# Supplementary material for: Assessment of magnetic properties of A2B′B′′O6 double perovskites by multivariate data analysis techniques
Source: Royal Society of Chemistry journal article supplement (doi:10.1039/c8cc09579e), 2019-01-01
Supplement: c8cc09579e1.xlsx [file c8cc09579e1.xlsx]

## Sheet: Data
Formula	A	Bʹ	Bʹʹ	X	Ablock	Bʹblock	Bʹʹblock	rA	rBʹ	rBʹʹ	rBave	rBdiff	t	fitness factor, f	cA	cBʹ	cBʹʹ	cBdiff	A cation	Bʹ cation	Bʹʹ cation	dA	dBʹ	dBʹʹ	EiA	EiBʹ	EiBʹʹ	χA	χBʹ	χBʹʹ	synthesis method (solid-state, sol-gel, HP, flux, floating-zone)	synthesis atmosphere	syn-T	Syn-t	syn-p	sys	spg	a	b	c	α	β	γ	Vol	c/a	Bʹ-O-Bʹʹ	type of ordering (disordered, rock-salt, layered)	S	color
Ba2AgIO6	Ba	Ag	I	O	s	d	p	1.61	1.15	0.53	0.84	0.62	0.950175	1.01647	2	1	7	6	Ba2	Ag1	I7	0	10	10	10.0038	7.57623	87.607	0.89	1.93	2.66	solution					c		8.46						75.687			rs?		brown
Ba2AgIO6	Ba	Ag	I	O	s	d	p	1.61	1.15	0.53	0.84	0.62	0.950175	1.01647	2	1	7	6	Ba2	Ag1	I7	0	10	10	10.0038	7.57623	87.607	0.89	1.93	2.66	solution					c		8.46						75.687			rs		yellow
Ba2AlNbO6	Ba	Al	Nb	O	s	p	d	1.61	0.535	0.64	0.5875	0.105	1.07089	1.1456	2	3	5	2	Ba2	Al3	Nb5	0		0	10.0038	28.4476	50.5728	0.89	1.61	1.6	HP		1400			c		3.984						63.2351			d
Ba2AlTaO6	Ba	Al	Ta	O	s	p	d	1.61	0.535	0.64	0.5875	0.105	1.07089	1.1456	2	3	5	2	Ba2	Al3	Ta5	0		0	10.0038	28.4476	48.272	0.89	1.61	1.5	HP		1400			c		3.982						63.1399			d
Ba2BaOsO6	Ba	Ba	Os	O	s	s	d	1.61	1.35	0.545	0.9475	0.805	0.906663	0.969919	2	2	6	4	Ba2	Ba2	Os6	0	0	2	10.0038	10.0038	70.1	0.89	0.89	2.2			1000			te		8.66		8.34				78.1829	0.963048		rs
Ba2BaReO6	Ba	Ba	Re	O	s	s	d	1.61	1.35	0.55	0.95	0.8	0.905698	0.968887	2	2	6	4	Ba2	Ba2	Re6	0	0	1	10.0038	10.0038	67	0.89	0.89	1.9						te		8.65		8.33				77.9089	0.963006		rs?
Ba2BaUO6	Ba	Ba	U	O	s	s	f	1.61	1.35	0.73	1.04	0.62	0.872292	0.933149	2	2	6	4	Ba2	Ba2	U6	0	0		10.0038	10.0038	62	0.89	0.89	1.38	ss	air	1000			c	Fm-3m	8.89						87.8244			rs		yellow-orange
Ba2BaUO6	Ba	Ba	U	O	s	s	f	1.61	1.35	0.73	1.04	0.62	0.872292	0.933149	2	2	6	4	Ba2	Ba2	U6	0	0		10.0038	10.0038	62	0.89	0.89	1.38						te		6.285		8.943				88.3149	1.00615		rs
Ba2BaUO6	Ba	Ba	U	O	s	s	f	1.61	1.35	0.73	1.04	0.62	0.872292	0.933149	2	2	6	4	Ba2	Ba2	U6	0	0		10.0038	10.0038	62	0.89	0.89	1.38	ss	air	1200			?		6.301	6.457	8.949				91.0238			rs?
Ba2BaWO6	Ba	Ba	W	O	s	s	d	1.61	1.35	0.6	0.975	0.75	0.896165	0.958688	2	2	6	4	Ba2	Ba2	W6	0	0	0	10.0038	10.0038	64.77	0.89	0.89	2.36						~c?		8.6						79.507			rs
Ba2BeUO6	Ba	Be	U	O	s	s	f	1.61	0.45	0.73	0.59	0.28	1.06954	1.14416	2	2	6	4	Ba2	Be2	U6	0			10.0038	18.2112	62	0.89	1.57	1.38			1300			c		8.82						85.7661			rs
Ba2BiBiO6	Ba	Bi	Bi	O	s	p	p	1.61	1.03	0.76	0.895	0.27	0.927404	0.992106	2	3	5	2	Ba2	Bi3	Bi5	0	10	10	10.0038	25.563	54.856	0.89	2.02	2.02	ss / hydrothermal	air	700				F2/m	8.7071	8.7071	8.6641	89.899	90.101	90.401	82.1071			rs
Ba2BiBiO6	Ba	Bi	Bi	O	s	p	p	1.61	1.03	0.76	0.895	0.27	0.927404	0.992106	2	3	5	2	Ba2	Bi3	Bi5	0	10	10	10.0038	25.563	54.856	0.89	2.02	2.02	ss	O2	750			tr		4.356	4.356	4.333	89.9	89.9	89.63	82.2156			rs		dusky gold
Ba2BiBiO6	Ba	Bi	Bi	O	s	p	p	1.61	1.03	0.76	0.895	0.27	0.927404	0.992106	2	3	5	2	Ba2	Bi3	Bi5	0	10	10	10.0038	25.563	54.856	0.89	2.02	2.02	ss	air	800			m		4.34	4.32	4.34		90.4		81.3678
Ba2BiBiO6	Ba	Bi	Bi	O	s	p	p	1.61	1.03	0.76	0.895	0.27	0.927404	0.992106	2	3	5	2	Ba2	Bi3	Bi5	0	10	10	10.0038	25.563	54.856	0.89	2.02	2.02						m	I2/m	6.181	6.136	8.67		90.17		82.2056			rs
Ba2BiBiO6	Ba	Bi	Bi	O	s	p	p	1.61	1.03	0.76	0.895	0.27	0.927404	0.992106	2	3	5	2	Ba2	Bi3	Bi5	0	10	10	10.0038	25.563	54.856	0.89	2.02	2.02	ss	air	800			m	I2/m	6.1895	6.1418	8.6741		90.18		82.4354		164.11	rs
Ba2BiIrO6	Ba	Bi	Ir	O	s	p	d	1.61	1.03	0.57	0.8	0.46	0.967451	1.03495	2	3	5	2	Ba2	Bi3	Ir5	0	10	4	10.0038	25.563	57	0.89	2.02	2.2	ss	air	273			r	R-3	6.0046		14.7497				76.7593			rs
Ba2BiNbO6	Ba	Bi	Nb	O	s	p	d	1.61	1.03	0.64	0.835	0.39	0.9523	1.01874	2	3	5	2	Ba2	Bi3	Nb5	0	10	0	10.0038	25.563	50.5728	0.89	2.02	1.6			800			r		8.63			90.3			80.342
Ba2BiRuO6	Ba	Bi	Ru	O	s	p	d	1.61	1.03	0.565	0.7975	0.465	0.968551	1.03612	2	3	5	2	Ba2	Bi3	Ru5	0	10	3	10.0038	25.563	59	0.89	2.02	2.2	ss	air	1200			c		4.35						82.3129			d	0
Ba2BiSbO6	Ba	Bi	Sb	O	s	p	p	1.61	0.895	0.68	0.7875	0.215	0.972979	1.04086	2	4	4	0	Ba2	Bi4	Sb4	0	10	10	10.0038	45.37	43.804	0.89	2.02	2.05	flux		1200			r	R-3m	6.043			60.06			78.1273		179.9	rs		dark brown
Ba2BiSbO6	Ba	Bi	Sb	O	s	p	p	1.61	0.895	0.68	0.7875	0.215	0.972979	1.04086	2	4	4	0	Ba2	Bi4	Sb4	0	10	10	10.0038	45.37	43.804	0.89	2.02	2.05	ss	air	850			r	R-3	6.05054			59.875			78.0915			rs
Ba2BiSbO6	Ba	Bi	Sb	O	s	p	p	1.61	0.895	0.68	0.7875	0.215	0.972979	1.04086	2	4	4	0	Ba2	Bi4	Sb4	0	10	10	10.0038	45.37	43.804	0.89	2.02	2.05	ss	O2	950			r	R-3	6.0424			60.178			78.3124			rs	0.98
Ba2BiTaO6	Ba	Bi	Ta	O	s	p	d	1.61	1.03	0.64	0.835	0.39	0.9523	1.01874	2	3	5	2	Ba2	Bi3	Ta5	0	10	0	10.0038	25.563	48.272	0.89	2.02	1.5			830			r		8.568			90.2167			78.6228
Ba2BiTaO6	Ba	Bi	Ta	O	s	p	d	1.61	1.03	0.64	0.835	0.39	0.9523	1.01874	2	3	5	2	Ba2	Bi3	Ta5	0	10	0	10.0038	25.563	48.272	0.89	2.02	1.5	ss					r	R-3	6.0492			60.269			78.7381			rs
Ba2BiTaO6	Ba	Bi	Ta	O	s	p	d	1.61	1.03	0.64	0.835	0.39	0.9523	1.01874	2	3	5	2	Ba2	Bi3	Ta5	0	10	0	10.0038	25.563	48.272	0.89	2.02	1.5	ss					r	R-3	6.0513			60.285			78.8485			rs
Ba2BiVO6	Ba	Bi	V	O	s	p	d	1.61	1.03	0.54	0.785	0.49	0.974092	1.04205	2	3	5	2	Ba2	Bi3	V5	0	10	0	10.0038	25.563	65.2816	0.89	2.02	1.63			900			m		8.7	8.622	8.7		90.5333		81.5714
Ba2CaIrO6	Ba	Ca	Ir	O	s	s	d	1.61	1		1	1	0.88683	0.948702	2	2	6	4	Ba2	Ca2	Ir6	0	0	3	10.0038	11.8717	72	0.89	1	2.2	ss	HP O2	900			c	Fm-3m	8.3639						73.1369			rs
Ba2CaIrO6	Ba	Ca	Ir	O	s	s	d	1.61	1		1	1	0.88683	0.948702	2	2	6	4	Ba2	Ca2	Ir6	0	0	3	10.0038	11.8717	72	0.89	1	2.2	ss	HP O2	880			c		8.364						73.1395			rs?		black
Ba2CaIrO6	Ba	Ca	Ir	O	s	s	d	1.61	1		1	1	0.88683	0.948702	2	2	6	4	Ba2	Ca2	Ir6	0	0	3	10.0038	11.8717	72	0.89	1	2.2	HP	O2	880			c	Fm-3m	?									rs
Ba2CaIrO6	Ba	Ca	Ir	O	s	s	d	1.61	1		1	1	0.88683	0.948702	2	2	6	4	Ba2	Ca2	Ir6	0	0	3	10.0038	11.8717	72	0.89	1	2.2																	rs?
Ba2CaIrO6	Ba	Ca	Ir	O	s	s	d	1.61	1		1	1	0.88683	0.948702	2	2	6	4	Ba2	Ca2	Ir6	0	0	3	10.0038	11.8717	72	0.89	1	2.2	ss	HP O2	880														rs
Ba2CaMoO6	Ba	Ca	Mo	O	s	s	d	1.61	1	0.59	0.795	0.41	0.969654	1.0373	2	2	6	4	Ba2	Ca2	Mo6	0	0	0	10.0038	11.8717	68.827	0.89	1	2.16						~c?		8.355						72.9037			rs
Ba2CaMoO6	Ba	Ca	Mo	O	s	s	d	1.61	1	0.59	0.795	0.41	0.969654	1.0373	2	2	6	4	Ba2	Ca2	Mo6	0	0	0	10.0038	11.8717	68.827	0.89	1	2.16						c	Fm-3m	8.37569						73.4466			rs
Ba2CaMoO6	Ba	Ca	Mo	O	s	s	d	1.61	1	0.59	0.795	0.41	0.969654	1.0373	2	2	6	4	Ba2	Ca2	Mo6	0	0	0	10.0038	11.8717	68.827	0.89	1	2.16	ss		1350			c	Fm-3m	8.38011						73.563			rs
Ba2CaMoO6	Ba	Ca	Mo	O	s	s	d	1.61	1	0.59	0.795	0.41	0.969654	1.0373	2	2	6	4	Ba2	Ca2	Mo6	0	0	0	10.0038	11.8717	68.827	0.89	1	2.16	ss		1300														rs?
Ba2CaNpO6	Ba	Ca	Np	O	s	s	f	1.61	1	0.72	0.86	0.28	0.941766	1.00747	2	2	6	4	Ba2	Ca2	Np6	0	0		10.0038	11.8717	65	0.89	1	1.36	ss	O2	1200			c	Fm-3m	8.6235						80.1606			rs?
Ba2CaOsO6	Ba	Ca	Os	O	s	s	d	1.61	1	0.545	0.7725	0.455	0.979697	1.04805	2	2	6	4	Ba2	Ca2	Os6	0	0	2	10.0038	11.8717	70.1	0.89	1	2.2	ss	air	1000			c	Fm-3m	8.359						73.0084			rs?
Ba2CaOsO6	Ba	Ca	Os	O	s	s	d	1.61	1	0.545	0.7725	0.455	0.979697	1.04805	2	2	6	4	Ba2	Ca2	Os6	0	0	2	10.0038	11.8717	70.1	0.89	1	2.2		vacuum	1000			c		8.362						73.0871			rs
Ba2CaPuO6	Ba	Ca	Pu	O	s	s	f	1.61	1	0.71	0.855	0.29	0.943854	1.0097	2	2	6	4	Ba2	Ca2	Pu6	0	0		10.0038	11.8717	80	0.89	1	1.28	ss	O2	1200			c	Fm-3m	8.6112						79.818			rs?
Ba2CaReO6	Ba	Ca	Re	O	s	s	d	1.61	1	0.55	0.775	0.45	0.978571	1.04684	2	2	6	4	Ba2	Ca2	Re6	0	0	1	10.0038	11.8717	67	0.89	1	1.9	ss	vacuum	1000			c		8.357						72.956			rs
Ba2CaReO6	Ba	Ca	Re	O	s	s	d	1.61	1	0.55	0.775	0.45	0.978571	1.04684	2	2	6	4	Ba2	Ca2	Re6	0	0	1	10.0038	11.8717	67	0.89	1	1.9	ss	N2	1000			?		8.35						72.7729			rs?
Ba2CaReO6	Ba	Ca	Re	O	s	s	d	1.61	1	0.55	0.775	0.45	0.978571	1.04684	2	2	6	4	Ba2	Ca2	Re6	0	0	1	10.0038	11.8717	67	0.89	1	1.9						c		8.356						72.9298			rs?
Ba2CaReO6	Ba	Ca	Re	O	s	s	d	1.61	1	0.55	0.775	0.45	0.978571	1.04684	2	2	6	4	Ba2	Ca2	Re6	0	0	1	10.0038	11.8717	67	0.89	1	1.9	ss	vacuum	1000			c		8.356						72.9298			rs		black-blue
Ba2CaReO6	Ba	Ca	Re	O	s	s	d	1.61	1	0.55	0.775	0.45	0.978571	1.04684	2	2	6	4	Ba2	Ca2	Re6	0	0	1	10.0038	11.8717	67	0.89	1	1.9	ss	vacuum	900			c	Fm-3m	8.371						73.3233			rs?
Ba2CaTeO6	Ba	Ca	Te	O	s	s	p	1.61	1	0.56	0.78	0.44	0.976326	1.04444	2	2	6	4	Ba2	Ca2	Te6	0	0	10	10.0038	11.8717	69.1	0.89	1	2.1			1100					8.38						73.5601
Ba2CaTeO6	Ba	Ca	Te	O	s	s	p	1.61	1	0.56	0.78	0.44	0.976326	1.04444	2	2	6	4	Ba2	Ca2	Te6	0	0	10	10.0038	11.8717	69.1	0.89	1	2.1	ss	air	1100			c		8.393						73.9029			rs?		yellow
Ba2CaTeO6	Ba	Ca	Te	O	s	s	p	1.61	1	0.56	0.78	0.44	0.976326	1.04444	2	2	6	4	Ba2	Ca2	Te6	0	0	10	10.0038	11.8717	69.1	0.89	1	2.1	ss	air	1100			c	Fm-3m	8.3946						73.9452			rs
Ba2CaUO6	Ba	Ca	U	O	s	s	f	1.61	1	0.73	0.865	0.27	0.939687	1.00525	2	2	6	4	Ba2	Ca2	U6	0	0		10.0038	11.8717	62	0.89	1	1.38	ss	O2	1200			c	Fm-3m	8.6691						81.4389			rs?
Ba2CaUO6	Ba	Ca	U	O	s	s	f	1.61	1	0.73	0.865	0.27	0.939687	1.00525	2	2	6	4	Ba2	Ca2	U6	0	0		10.0038	11.8717	62	0.89	1	1.38	ss	air	1200			m		6.129	6.129	8.673		89.7		81.4484			rs?
Ba2CaUO6	Ba	Ca	U	O	s	s	f	1.61	1	0.73	0.865	0.27	0.939687	1.00525	2	2	6	4	Ba2	Ca2	U6	0	0		10.0038	11.8717	62	0.89	1	1.38	ss	air	1000			c	Fm-3m	8.67						81.4643			rs		yellow-orange
Ba2CaUO6	Ba	Ca	U	O	s	s	f	1.61	1	0.73	0.865	0.27	0.939687	1.00525	2	2	6	4	Ba2	Ca2	U6	0	0		10.0038	11.8717	62	0.89	1	1.38	ss	air	1300			m	P21/n	6.16146	6.11877	8.6975		90.1005		81.975			rs
Ba2CaWO6	Ba	Ca	W	O	s	s	d	1.61	1	0.6	0.8	0.4	0.967451	1.03495	2	2	6	4	Ba2	Ca2	W6	0	0	0	10.0038	11.8717	64.77	0.89	1	2.36						te	I4/m	5.92946		8.39171				73.76	1.00074		rs
Ba2CaWO6	Ba	Ca	W	O	s	s	d	1.61	1	0.6	0.8	0.4	0.967451	1.03495	2	2	6	4	Ba2	Ca2	W6	0	0	0	10.0038	11.8717	64.77	0.89	1	2.36	ss	air	1300			te	I4/m	5.93		8.397				73.8199	1.00128		rs?
Ba2CaWO6	Ba	Ca	W	O	s	s	d	1.61	1	0.6	0.8	0.4	0.967451	1.03495	2	2	6	4	Ba2	Ca2	W6	0	0	0	10.0038	11.8717	64.77	0.89	1	2.36						~c?		8.39						73.8237			rs
Ba2CaWO6	Ba	Ca	W	O	s	s	d	1.61	1	0.6	0.8	0.4	0.967451	1.03495	2	2	6	4	Ba2	Ca2	W6	0	0	0	10.0038	11.8717	64.77	0.89	1	2.36	ss	air	1250			c		8.39						73.8237			rs
Ba2CaWO6	Ba	Ca	W	O	s	s	d	1.61	1	0.6	0.8	0.4	0.967451	1.03495	2	2	6	4	Ba2	Ca2	W6	0	0	0	10.0038	11.8717	64.77	0.89	1	2.36	ss	air	1350			c	Fm-3m	8.39405						73.9307			rs
Ba2CaWO6	Ba	Ca	W	O	s	s	d	1.61	1	0.6	0.8	0.4	0.967451	1.03495	2	2	6	4	Ba2	Ca2	W6	0	0	0	10.0038	11.8717	64.77	0.89	1	2.36	ss	air	1300			c	Fm-3m	8.39405						73.9307			rs
Ba2CaWO6	Ba	Ca	W	O	s	s	d	1.61	1	0.6	0.8	0.4	0.967451	1.03495	2	2	6	4	Ba2	Ca2	W6	0	0	0	10.0038	11.8717	64.77	0.89	1	2.36	ss		1350			te	I4/m	5.9374		8.4015				74.0439	1.00057	178.667	rs
Ba2CaWO6	Ba	Ca	W	O	s	s	d	1.61	1	0.6	0.8	0.4	0.967451	1.03495	2	2	6	4	Ba2	Ca2	W6	0	0	0	10.0038	11.8717	64.77	0.89	1	2.36	ss		1300														rs?
Ba2CdMoO6	Ba	Cd	Mo	O	s	d	d	1.61	0.95	0.59	0.77	0.36	0.980826	1.04926	2	2	6	4	Ba2	Cd2	Mo6	0	10	0	10.0038	16.9083	68.827	0.89	1.69	2.16	nitrate decomp	air	900			c		8.3242						72.1004			rs
Ba2CdMoO6	Ba	Cd	Mo	O	s	d	d	1.61	0.95	0.59	0.77	0.36	0.980826	1.04926	2	2	6	4	Ba2	Cd2	Mo6	0	10	0	10.0038	16.9083	68.827	0.89	1.69	2.16						c	Fm-3m	8.32695						72.1719			rs
Ba2CdMoO6	Ba	Cd	Mo	O	s	d	d	1.61	0.95	0.59	0.77	0.36	0.980826	1.04926	2	2	6	4	Ba2	Cd2	Mo6	0	10	0	10.0038	16.9083	68.827	0.89	1.69	2.16	ss		900			c		8.327						72.1732
Ba2CdOsO6	Ba	Cd	Os	O	s	d	d	1.61	0.95	0.545	0.7475	0.405	0.991102	1.06025	2	2	6	4	Ba2	Cd2	Os6	0	10	2	10.0038	16.9083	70.1	0.89	1.69	2.2			1000			c		8.325						72.1212			rs
Ba2CdReO6	Ba	Cd	Re	O	s	d	d	1.61	0.95	0.55	0.75	0.4	0.989949	1.05902	2	2	6	4	Ba2	Cd2	Re6	0	10	1	10.0038	16.9083	67	0.89	1.69	1.9						c		8.322						72.0432			rs?
Ba2CdReO6	Ba	Cd	Re	O	s	d	d	1.61	0.95	0.55	0.75	0.4	0.989949	1.05902	2	2	6	4	Ba2	Cd2	Re6	0	10	1	10.0038	16.9083	67	0.89	1.69	1.9	ss	vacuum	1000			c		8.322						72.0432			rs		black-blue
Ba2CdTeO6	Ba	Cd	Te	O	s	d	p	1.61	0.95	0.56	0.755	0.39	0.987653	1.05656	2	2	6	4	Ba2	Cd2	Te6	0	10	10	10.0038	16.9083	69.1	0.89	1.69	2.1			1100					8.36						73.0346
Ba2CdUO6	Ba	Cd	U	O	s	d	f	1.61	0.95	0.73	0.84	0.22	0.950175	1.01647	2	2	6	4	Ba2	Cd2	U6	0	10		10.0038	16.9083	62	0.89	1.69	1.38	ss	air	900			c	Fm-3m	8.6214						80.102			rs
Ba2CdUO6	Ba	Cd	U	O	s	d	f	1.61	0.95	0.73	0.84	0.22	0.950175	1.01647	2	2	6	4	Ba2	Cd2	U6	0	10		10.0038	16.9083	62	0.89	1.69	1.38	ss	air	1000			o		6.13	8.64	6.07				80.3717			rs
Ba2CdWO6	Ba	Cd	W	O	s	d	d	1.61	0.95	0.6	0.775	0.35	0.978571	1.04684	2	2	6	4	Ba2	Cd2	W6	0	10	0	10.0038	16.9083	64.77	0.89	1.69	2.36						c	Fm-3m	8.3412						72.543			rs
Ba2CeBiO6	Ba	Ce	Bi	O	s	f	p	1.61	0.87		0.87	0.87	0.937617	1.00303	2	4	4	0	Ba2	Ce4	Bi4	0	0	10	10.0038	36.906	45.37	0.89	1.12	2.02	ss	air	800			c		4.359						82.8248
Ba2CeBiO6	Ba	Ce	Bi	O	s	f	p	1.61	0.87		0.87	0.87	0.937617	1.00303	2	4	4	0	Ba2	Ce4	Bi4	0	0	10	10.0038	36.906	45.37	0.89	1.12	2.02	ss	air	1000			o	Pbnm	6.2158	6.1793	8.7286				83.8148		161.967	d	0	black
Ba2CeBiO6	Ba	Ce	Bi	O	s	f	p	1.61	0.87		0.87	0.87	0.937617	1.00303	2	4	4	0	Ba2	Ce4	Bi4	0	0	10	10.0038	36.906	45.37	0.89	1.12	2.02	ss	air	850			c	Fm-3m	8.754						83.8551			rs
Ba2CeBiO6	Ba	Ce	Bi	O	s	f	p	1.61	0.87		0.87	0.87	0.937617	1.00303	2	4	4	0	Ba2	Ce4	Bi4	0	0	10	10.0038	36.906	45.37	0.89	1.12	2.02	ss	air	850														d	0
Ba2CeIrO6	Ba	Ce	Ir	O	s	f	d	1.61	0.87	0.625	0.7475	0.245	0.991102	1.06025	2	4	4	0	Ba2	Ce4	Ir4	0	0	5	10.0038	36.906	40	0.89	1.12	2.2	ss	air	1200			m	P21/n	5.9663	5.9567	8.4266		89.986		74.8692			rs	1
Ba2CeMoO6	Ba	Ce	Mo	O	s	f	d	1.61	1.01	0.59	0.8	0.42	0.967451	1.03495	2	3	5	2	Ba2	Ce3	Mo5	0	0	1	10.0038	20.1974	54.4167	0.89	1.12	2.16	ss	H2/N2	1400			o		8.52	8.74	9.07				84.4245					black
Ba2CeNbO6	Ba	Ce	Nb	O	s	f	d	1.61	1.01	0.64	0.825	0.37	0.95658	1.02332	2	3	5	2	Ba2	Ce3	Nb5	0	0	0	10.0038	20.1974	50.5728	0.89	1.12	1.6						c		4.293						79.1193			d	0
Ba2CeNbO6	Ba	Ce	Nb	O	s	f	d	1.61	1.01	0.64	0.825	0.37	0.95658	1.02332	2	3	5	2	Ba2	Ce3	Nb5	0	0	0	10.0038	20.1974	50.5728	0.89	1.12	1.6	ss	H2/N2	1425			m	I2/m	6.1031	6.0617	8.5668		90.181		79.2321			rs	1
Ba2CePtO6	Ba	Ce	Pt	O	s	f	d	1.61	0.87	0.625	0.7475	0.245	0.991102	1.06025	2	4	4	0	Ba2	Ce4	Pt4	0	0	6	10.0038	36.906	43	0.89	1.12	2.28						c	Fm-3m	8.4088						74.3211			rs	1
Ba2CePuO6	Ba	Ce	Pu	O	s	f	f	1.61	1.01	0.74	0.875	0.27	0.935557	1.00083	2	3	5	2	Ba2	Ce3	Pu5	0	0		10.0038	20.1974	49	0.89	1.12	1.28	ss		950			c		8.72						82.8819
Ba2CeSnO6	Ba	Ce	Sn	O	s	f	p	1.61	0.87	0.69	0.78	0.18	0.976326	1.04444	2	4	4	0	Ba2	Ce4	Sn4	0	0	10	10.0038	36.906	40.735	0.89	1.12	1.96	sol-gel		1200			c	Fm-3m	8.548						78.0735					yellowish green
Ba2CeTaO6	Ba	Ce	Ta	O	s	f	d	1.61	1.01	0.64	0.825	0.37	0.95658	1.02332	2	3	5	2	Ba2	Ce3	Ta5	0	0	0	10.0038	20.1974	48.272	0.89	1.12	1.5	ss	H2/N2	1425			m	I2/m	6.10944	6.07119	8.57961		90.1986		79.5573			rs	1
Ba2CeUO6	Ba	Ce	U	O	s	f	f	1.61	1.01	0.76	0.885	0.25	0.931462	0.996448	2	3	5	2	Ba2	Ce3	U5	0	0		10.0038	20.1974	46	0.89	1.12	1.38			1300			c		8.87						87.233			rs
Ba2CoIrO6	Ba	Co	Ir	O	s	d	d	1.61	0.61	0.57	0.59	0.04	1.06954	1.14416	2	3	5	2	Ba2	Co3	Ir5	0	6	4	10.0038	33.5	57	0.89	1.88	2.2						h
Ba2CoMoO6	Ba	Co	Mo	O	s	d	d	1.61	0.745	0.59	0.6675	0.155	1.02945	1.10127	2	2	6	4	Ba2	Co2	Mo6	0	7	0	10.0038	17.0844	68.827	0.89	1.88	2.16	nitrate decomp	air	1000			c		8.076						65.8414			rs
Ba2CoMoO6	Ba	Co	Mo	O	s	d	d	1.61	0.745	0.59	0.6675	0.155	1.02945	1.10127	2	2	6	4	Ba2	Co2	Mo6	0	7	0	10.0038	17.0844	68.827	0.89	1.88	2.16	ss	air or Ar	1400			c		4.0429						66.0814			rs?		black
Ba2CoMoO6	Ba	Co	Mo	O	s	d	d	1.61	0.745	0.59	0.6675	0.155	1.02945	1.10127	2	2	6	4	Ba2	Co2	Mo6	0	7	0	10.0038	17.0844	68.827	0.89	1.88	2.16	sol-gel	air	1100			c	Fm-3m	8.08623						66.0919			rs	0.99	black
Ba2CoNbO6	Ba	Co	Nb	O	s	d	d	1.61	0.61	0.64	0.625	0.03	1.05106	1.12439	2	3	5	2	Ba2	Co3	Nb5	0	6	0	10.0038	33.5	50.5728	0.89	1.88	1.6	ss	air/O2	1300			c		4.06						66.9234			d	0
Ba2CoNbO6	Ba	Co	Nb	O	s	d	d	1.61	0.61	0.64	0.625	0.03	1.05106	1.12439	2	3	5	2	Ba2	Co3	Nb5	0	6	0	10.0038	33.5	50.5728	0.89	1.88	1.6	ss	air/O2	1200			c	Pm-3m	4.0789						67.8624			d	0
Ba2CoNbO6	Ba	Co	Nb	O	s	d	d	1.61	0.61	0.64	0.625	0.03	1.05106	1.12439	2	3	5	2	Ba2	Co3	Nb5	0	6	0	10.0038	33.5	50.5728	0.89	1.88	1.6	ss	air	1290			m	P21/n	5.766	5.7612	8.1743		89.8		67.8853		178.1	rs	0.3
Ba2CoOsO6	Ba	Co	Os	O	s	d	d	1.61	0.745	0.545	0.645	0.2	1.04078	1.11339	2	2	6	4	Ba2	Co2	Os6	0	7	2	10.0038	17.0844	70.1	0.89	1.88	2.2						h
Ba2CoReO6	Ba	Co	Re	O	s	d	d	1.61	0.745	0.55	0.6475	0.195	1.03951	1.11203	2	2	6	4	Ba2	Co2	Re6	0	7	1	10.0038	17.0844	67	0.89	1.88	1.9	hydrothermal		700			c	Fm-3m	8.078						65.8903			rs	0.9	black
Ba2CoReO6	Ba	Co	Re	O	s	d	d	1.61	0.745	0.55	0.6475	0.195	1.03951	1.11203	2	2	6	4	Ba2	Co2	Re6	0	7	1	10.0038	17.0844	67	0.89	1.88	1.9	ss	vacuum	273			c	Fm-3m	8.072						65.7436			rs
Ba2CoReO6	Ba	Co	Re	O	s	d	d	1.61	0.745	0.55	0.6475	0.195	1.03951	1.11203	2	2	6	4	Ba2	Co2	Re6	0	7	1	10.0038	17.0844	67	0.89	1.88	1.9						c		8.086						66.0863			rs?
Ba2CoReO6	Ba	Co	Re	O	s	d	d	1.61	0.745	0.55	0.6475	0.195	1.03951	1.11203	2	2	6	4	Ba2	Co2	Re6	0	7	1	10.0038	17.0844	67	0.89	1.88	1.9	ss	vacuum	1000			c		8.086						66.0863			rs		black-blue
Ba2CoReO6	Ba	Co	Re	O	s	d	d	1.61	0.745	0.55	0.6475	0.195	1.03951	1.11203	2	2	6	4	Ba2	Co2	Re6	0	7	1	10.0038	17.0844	67	0.89	1.88	1.9	ss	N2	1000			c		8.1						66.4301			rs?
Ba2CoReO6	Ba	Co	Re	O	s	d	d	1.61	0.745	0.55	0.6475	0.195	1.03951	1.11203	2	2	6	4	Ba2	Co2	Re6	0	7	1	10.0038	17.0844	67	0.89	1.88	1.9								8.1						66.4301
Ba2CoSbO6	Ba	Co	Sb	O	s	d	p	1.61	0.61	0.6	0.605	0.01	1.06154	1.1356	2	3	5	2	Ba2	Co3	Sb5	0	6	10	10.0038	33.5	55	0.89	1.88	2.05						h
Ba2CoTaO6	Ba	Co	Ta	O	s	d	d	1.61	0.61	0.64	0.625	0.03	1.05106	1.12439	2	3	5	2	Ba2	Co3	Ta5	0	6	0	10.0038	33.5	48.272	0.89	1.88	1.5	ss	air/O2	1200			c	Pm-3m	4.0769						67.7626			d	0
Ba2CoTaO6	Ba	Co	Ta	O	s	d	d	1.61	0.61	0.64	0.625	0.03	1.05106	1.12439	2	3	5	2	Ba2	Co3	Ta5	0	6	0	10.0038	33.5	48.272	0.89	1.88	1.5						c	Pm-3m	4.077						67.7676			d	0
Ba2CoTeO6	Ba	Co	Te	O	s	d	p	1.61	0.745	0.56	0.6525	0.185	1.03698	1.10932	2	2	6	4	Ba2	Co2	Te6	0	7	10	10.0038	17.0844	69.1	0.89	1.88	2.1			1100					8.13						67.171
Ba2CoTeO6	Ba	Co	Te	O	s	d	p	1.61	0.745	0.56	0.6525	0.185	1.03698	1.10932	2	2	6	4	Ba2	Co2	Te6	0	7	10	10.0038	17.0844	69.1	0.89	1.88	2.1						h
Ba2CoUO6	Ba	Co	U	O	s	d	f	1.61	0.745	0.73	0.7375	0.015	0.995739	1.06521	2	2	6	4	Ba2	Co2	U6	0	7		10.0038	17.0844	62	0.89	1.88	1.38	ss		1100					8.37						73.297			rs?		dark brown
Ba2CoUO6	Ba	Co	U	O	s	d	f	1.61	0.745	0.73	0.7375	0.015	0.995739	1.06521	2	2	6	4	Ba2	Co2	U6	0	7		10.0038	17.0844	62	0.89	1.88	1.38	ss	vacuum	900			c	Fm-3m	8.372						73.3496			rs
Ba2CoUO6	Ba	Co	U	O	s	d	f	1.61	0.745	0.73	0.7375	0.015	0.995739	1.06521	2	2	6	4	Ba2	Co2	U6	0	7		10.0038	17.0844	62	0.89	1.88	1.38	ss	air	1000			c	Fm-3m	8.3738						73.3969			rs
Ba2CoUO6	Ba	Co	U	O	s	d	f	1.61	0.745	0.73	0.7375	0.015	0.995739	1.06521	2	2	6	4	Ba2	Co2	U6	0	7		10.0038	17.0844	62	0.89	1.88	1.38	ss	air	1000			c	Fm-3m	8.374						73.4022			rs
Ba2CoUO6	Ba	Co	U	O	s	d	f	1.61	0.745	0.73	0.7375	0.015	0.995739	1.06521	2	2	6	4	Ba2	Co2	U6	0	7		10.0038	17.0844	62	0.89	1.88	1.38	ss	air	1000			c		8.377						73.4811			rs
Ba2CoWO6	Ba	Co	W	O	s	d	d	1.61	0.745	0.6	0.6725	0.145	1.02697	1.09862	2	2	6	4	Ba2	Co2	W6	0	7	0	10.0038	17.0844	64.77	0.89	1.88	2.36	flux		1245			c		8.1						66.4301			rs
Ba2CoWO6	Ba	Co	W	O	s	d	d	1.61	0.745	0.6	0.6725	0.145	1.02697	1.09862	2	2	6	4	Ba2	Co2	W6	0	7	0	10.0038	17.0844	64.77	0.89	1.88	2.36	ss	vacuum	1250			c		8.098						66.3809			rs
Ba2CoWO6	Ba	Co	W	O	s	d	d	1.61	0.745	0.6	0.6725	0.145	1.02697	1.09862	2	2	6	4	Ba2	Co2	W6	0	7	0	10.0038	17.0844	64.77	0.89	1.88	2.36	ss	air or Ar	1400			c		4.05						66.4301			rs?		black
Ba2CoWO6	Ba	Co	W	O	s	d	d	1.61	0.745	0.6	0.6725	0.145	1.02697	1.09862	2	2	6	4	Ba2	Co2	W6	0	7	0	10.0038	17.0844	64.77	0.89	1.88	2.36	ss	air	1300			c	Fm-3m	8.1						66.4301			rs	0.9
Ba2CoWO6	Ba	Co	W	O	s	d	d	1.61	0.745	0.6	0.6725	0.145	1.02697	1.09862	2	2	6	4	Ba2	Co2	W6	0	7	0	10.0038	17.0844	64.77	0.89	1.88	2.36	sol-gel	air	1100			c	Fm-3m	8.10799						66.6269			rs	0.99	brown
Ba2CoWO6	Ba	Co	W	O	s	d	d	1.61	0.745	0.6	0.6725	0.145	1.02697	1.09862	2	2	6	4	Ba2	Co2	W6	0	7	0	10.0038	17.0844	64.77	0.89	1.88	2.36	ss	air	1000			c	Fm-3m	8.1137						66.7678			rs
Ba2CrBiO6	Ba	Cr	Bi	O	s	d	p	1.61	0.615	0.76	0.6875	0.145	1.01959	1.09072	2	3	5	2	Ba2	Cr3	Bi5	0	3	10	10.0038	30.959	54.856	0.89	1.66	2.02	ss	air/O2	1300			c		4.33						81.1827			d	0
Ba2CrMoO6	Ba	Cr	Mo	O	s	d	d	1.61	0.615	0.61	0.6125	0.005	1.05759	1.13137	2	3	5	2	Ba2	Cr3	Mo5	0	3	1	10.0038	30.959	54.4167	0.89	1.66	2.16	ss	H2/Ar	1200			c	Fm-3m	8.013						64.3125			rs
Ba2CrNbO6	Ba	Cr	Nb	O	s	d	d	1.61	0.615	0.64	0.6275	0.025	1.04976	1.123	2	3	5	2	Ba2	Cr3	Nb5	0	3	0	10.0038	30.959	50.5728	0.89	1.66	1.6	HP		930			c	Fm-3m	8.055						65.3291			rs/d
Ba2CrNbO6	Ba	Cr	Nb	O	s	d	d	1.61	0.615	0.64	0.6275	0.025	1.04976	1.123	2	3	5	2	Ba2	Cr3	Nb5	0	3	0	10.0038	30.959	50.5728	0.89	1.66	1.6						h
Ba2CrOsO6	Ba	Cr	Os	O	s	d	d	1.61	0.615	0.575	0.595	0.04	1.06686	1.1413	2	3	5	2	Ba2	Cr3	Os5	0	3	3	10.0038	30.959	55	0.89	1.66	2.2						h
Ba2CrReO6	Ba	Cr	Re	O	s	d	d	1.61	0.615	0.58	0.5975	0.035	1.06553	1.13987	2	3	5	2	Ba2	Cr3	Re5	0	3	2	10.0038	30.959	51.9	0.89	1.66	1.9						h
Ba2CrTaO6	Ba	Cr	Ta	O	s	d	d	1.61	0.615	0.64	0.6275	0.025	1.04976	1.123	2	3	5	2	Ba2	Cr3	Ta5	0	3	0	10.0038	30.959	48.272	0.89	1.66	1.5	HP		900			c	Fm-3m	8.0518						65.2513			rs	0.716
Ba2CrTaO6	Ba	Cr	Ta	O	s	d	d	1.61	0.615	0.64	0.6275	0.025	1.04976	1.123	2	3	5	2	Ba2	Cr3	Ta5	0	3	0	10.0038	30.959	48.272	0.89	1.66	1.5						h
Ba2CrTaO6	Ba	Cr	Ta	O	s	d	d	1.61	0.615	0.64	0.6275	0.025	1.04976	1.123	2	3	5	2	Ba2	Cr3	Ta5	0	3	0	10.0038	30.959	48.272	0.89	1.66	1.5						h
Ba2CrUO6	Ba	Cr	U	O	s	d	f	1.61	0.615	0.76	0.6875	0.145	1.01959	1.09072	2	3	5	2	Ba2	Cr3	U5	0	3		10.0038	30.959	46	0.89	1.66	1.38	ss	vacuum	1000			c	Fm-3m	8.297						71.3959			rs		brown
Ba2CrUO6	Ba	Cr	U	O	s	d	f	1.61	0.615	0.76	0.6875	0.145	1.01959	1.09072	2	3	5	2	Ba2	Cr3	U5	0	3		10.0038	30.959	46	0.89	1.66	1.38	ss	vacuum	1000			h													black
Ba2CrWO6	Ba	Cr	W	O	s	d	d	1.61	0.615	0.62	0.6175	0.005	1.05496	1.12857	2	3	5	2	Ba2	Cr3	W5	0	3	1	10.0038	30.959	51.6	0.89	1.66	2.36	ss	H2/Ar	1450			h
Ba2CuTeO6	Ba	Cu	Te	O	s	d	p	1.61	0.73	0.56	0.645	0.17	1.04078	1.11339	2	2	6	4	Ba2	Cu2	Te6	0	9	10	10.0038	20.2924	69.1	0.89	1.9	2.1	HP		900			te	I4/m	5.5903		8.6426				67.5235	1.09319	177.333	rs	1
Ba2CuUO6	Ba	Cu	U	O	s	d	f	1.61	0.73	0.73	0.73	0	0.999245	1.06896	2	2	6	4	Ba2	Cu2	U6	0	9		10.0038	20.2924	62	0.89	1.9	1.38	ss	air	1200			te	I4/mmm	5.773		8.805				73.3622	1.07848		rs
Ba2CuUO6	Ba	Cu	U	O	s	d	f	1.61	0.73	0.73	0.73	0	0.999245	1.06896	2	2	6	4	Ba2	Cu2	U6	0	9		10.0038	20.2924	62	0.89	1.9	1.38	ss	O2	1500			te	I4/mmm	5.772		8.821				73.4701	1.08063		rs
Ba2CuUO6	Ba	Cu	U	O	s	d	f	1.61	0.73	0.73	0.73	0	0.999245	1.06896	2	2	6	4	Ba2	Cu2	U6	0	9		10.0038	20.2924	62	0.89	1.9	1.38	ss	air	1100			te	I4/m	5.77138		8.82331				73.4735	1.08103	178.4	rs		red-brown
Ba2CuUO6	Ba	Cu	U	O	s	d	f	1.61	0.73	0.73	0.73	0	0.999245	1.06896	2	2	6	4	Ba2	Cu2	U6	0	9		10.0038	20.2924	62	0.89	1.9	1.38	flux	air	1050			te	I4/mmm	5.7792		8.8102				73.5633	1.07796		rs	1	brown
Ba2CuUO6	Ba	Cu	U	O	s	d	f	1.61	0.73	0.73	0.73	0	0.999245	1.06896	2	2	6	4	Ba2	Cu2	U6	0	9		10.0038	20.2924	62	0.89	1.9	1.38	ss	air	900			te		5.782		8.81				73.6329	1.07741		rs
Ba2CuUO6	Ba	Cu	U	O	s	d	f	1.61	0.73	0.73	0.73	0	0.999245	1.06896	2	2	6	4	Ba2	Cu2	U6	0	9		10.0038	20.2924	62	0.89	1.9	1.38	ss	air	1000			te		8.18		8.84				73.9382	1.08068		rs
Ba2CuUO6	Ba	Cu	U	O	s	d	f	1.61	0.73	0.73	0.73	0	0.999245	1.06896	2	2	6	4	Ba2	Cu2	U6	0	9		10.0038	20.2924	62	0.89	1.9	1.38	ss	air	1100			te	I4/mmm	5.78473		8.8424				73.9735	1.08087		rs	1	brown
Ba2CuWO6	Ba	Cu	W	O	s	d	d	1.61	0.73	0.6	0.665	0.13	1.0307	1.10261	2	2	6	4	Ba2	Cu2	W6	0	9	0	10.0038	20.2924	64.77	0.89	1.9	2.36	ss	air	1200			te	I4/m	5.56392		8.6274				66.77	1.09644		rs		green-yellow
Ba2CuWO6	Ba	Cu	W	O	s	d	d	1.61	0.73	0.6	0.665	0.13	1.0307	1.10261	2	2	6	4	Ba2	Cu2	W6	0	9	0	10.0038	20.2924	64.77	0.89	1.9	2.36						te	I4/mmm	5.541		8.599				66.0031	1.09735		rs
Ba2CuWO6	Ba	Cu	W	O	s	d	d	1.61	0.73	0.6	0.665	0.13	1.0307	1.10261	2	2	6	4	Ba2	Cu2	W6	0	9	0	10.0038	20.2924	64.77	0.89	1.9	2.36	ss	air/O2	1300			te		7.88		8.61				66.8291	1.09264		rs
Ba2CuWO6	Ba	Cu	W	O	s	d	d	1.61	0.73	0.6	0.665	0.13	1.0307	1.10261	2	2	6	4	Ba2	Cu2	W6	0	9	0	10.0038	20.2924	64.77	0.89	1.9	2.36	ss	air	1000			te	I4/m	5.5642		8.6363				66.8457	1.09751	174.667	rs	1
Ba2CuWO6	Ba	Cu	W	O	s	d	d	1.61	0.73	0.6	0.665	0.13	1.0307	1.10261	2	2	6	4	Ba2	Cu2	W6	0	9	0	10.0038	20.2924	64.77	0.89	1.9	2.36	ss	air	1000														rs?
Ba2CuWO6	Ba	Cu	W	O	s	d	d	1.61	0.73	0.6	0.665	0.13	1.0307	1.10261	2	2	6	4	Ba2	Cu2	W6	0	9	0	10.0038	20.2924	64.77	0.89	1.9	2.36																	rs?
Ba2CuWO6	Ba	Cu	W	O	s	d	d	1.61	0.73	0.6	0.665	0.13	1.0307	1.10261	2	2	6	4	Ba2	Cu2	W6	0	9	0	10.0038	20.2924	64.77	0.89	1.9	2.36																	rs?
Ba2DyBiO6	Ba	Dy	Bi	O	s	f	p	1.61	0.912	0.76	0.836	0.152	0.951875	1.01828	2	3	5	2	Ba2	Dy3	Bi5	0		10	10.0038	22.93	54.856	0.89	1.22	2.02	ss	air	800			c		4.288						78.8432
Ba2DyBiO6	Ba	Dy	Bi	O	s	f	p	1.61	0.912	0.76	0.836	0.152	0.951875	1.01828	2	3	5	2	Ba2	Dy3	Bi5	0		10	10.0038	22.93	54.856	0.89	1.22	2.02						c	Fm-3m	8.5831						79.0392			rs
Ba2DyBiO6	Ba	Dy	Bi	O	s	f	p	1.61	0.912	0.76	0.836	0.152	0.951875	1.01828	2	3	5	2	Ba2	Dy3	Bi5	0		10	10.0038	22.93	54.856	0.89	1.22	2.02	ss	air	850			c	Fm-3m	8.6						79.507			rs
Ba2DyBiO6	Ba	Dy	Bi	O	s	f	p	1.61	0.912	0.76	0.836	0.152	0.951875	1.01828	2	3	5	2	Ba2	Dy3	Bi5	0		10	10.0038	22.93	54.856	0.89	1.22	2.02	ss	air	1000			m													brown
Ba2DyBiO6	Ba	Dy	Bi	O	s	f	p	1.61	0.912	0.76	0.836	0.152	0.951875	1.01828	2	3	5	2	Ba2	Dy3	Bi5	0		10	10.0038	22.93	54.856	0.89	1.22	2.02	ss	air	850														rs
Ba2DyIrO6	Ba	Dy	Ir	O	s	f	d	1.61	0.912	0.57	0.741	0.342	0.994111	1.06347	2	3	5	2	Ba2	Dy3	Ir5	0		4	10.0038	22.93	57	0.89	1.22	2.2	ss	air	1200			m	P21/n	5.9245	5.9186	8.3653		90.01		73.3318			rs	1
Ba2DyIrO6	Ba	Dy	Ir	O	s	f	d	1.61	0.912	0.57	0.741	0.342	0.994111	1.06347	2	3	5	2	Ba2	Dy3	Ir5	0		4	10.0038	22.93	57	0.89	1.22	2.2	ss	air	1100			c		8.38						73.5601			rs?		black
Ba2DyMoO6	Ba	Dy	Mo	O	s	f	d	1.61	0.912	0.61	0.761	0.302	0.98491	1.05363	2	3	5	2	Ba2	Dy3	Mo5	0		1	10.0038	22.93	54.4167	0.89	1.22	2.16	ss	H2/N2	1100			c	Fm-3m	8.4062						74.2522			rs
Ba2DyMoO6	Ba	Dy	Mo	O	s	f	d	1.61	0.912	0.61	0.761	0.302	0.98491	1.05363	2	3	5	2	Ba2	Dy3	Mo5	0		1	10.0038	22.93	54.4167	0.89	1.22	2.16	ss	H2/N2	1300			c	Fm-3m	8.39982						74.0832			rs	1
Ba2DyMoO6	Ba	Dy	Mo	O	s	f	d	1.61	0.912	0.61	0.761	0.302	0.98491	1.05363	2	3	5	2	Ba2	Dy3	Mo5	0		1	10.0038	22.93	54.4167	0.89	1.22	2.16	ss	H2/N2	1400			c		8.409						74.3264					black
Ba2DyNbO6	Ba	Dy	Nb	O	s	f	d	1.61	0.912	0.64	0.776	0.272	0.978121	1.04636	2	3	5	2	Ba2	Dy3	Nb5	0		0	10.0038	22.93	50.5728	0.89	1.22	1.6						c		4.224						75.3654			d	0
Ba2DyNbO6	Ba	Dy	Nb	O	s	f	d	1.61	0.912	0.64	0.776	0.272	0.978121	1.04636	2	3	5	2	Ba2	Dy3	Nb5	0		0	10.0038	22.93	50.5728	0.89	1.22	1.6						c		8.45						75.4189
Ba2DyNbO6	Ba	Dy	Nb	O	s	f	d	1.61	0.912	0.64	0.776	0.272	0.978121	1.04636	2	3	5	2	Ba2	Dy3	Nb5	0		0	10.0038	22.93	50.5728	0.89	1.22	1.6	ss	air	1400			m	P21/n	5.9752	5.9751	8.461		90.033		75.5195			rs
Ba2DyNbO6	Ba	Dy	Nb	O	s	f	d	1.61	0.912	0.64	0.776	0.272	0.978121	1.04636	2	3	5	2	Ba2	Dy3	Nb5	0		0	10.0038	22.93	50.5728	0.89	1.22	1.6	ss	air	1500					?	?	?	?	?	?				rs
Ba2DyNbO6	Ba	Dy	Nb	O	s	f	d	1.61	0.912	0.64	0.776	0.272	0.978121	1.04636	2	3	5	2	Ba2	Dy3	Nb5	0		0	10.0038	22.93	50.5728	0.89	1.22	1.6	ss	air	1350														rs
Ba2DyOsO6	Ba	Dy	Os	O	s	f	d	1.61	0.912	0.575	0.7435	0.337	0.992951	1.06223	2	3	5	2	Ba2	Dy3	Os5	0		3	10.0038	22.93	55	0.89	1.22	2.2	ss	air	1370			c		8.37						73.297					black
Ba2DyOsO6	Ba	Dy	Os	O	s	f	d	1.61	0.912	0.575	0.7435	0.337	0.992951	1.06223	2	3	5	2	Ba2	Dy3	Os5	0		3	10.0038	22.93	55	0.89	1.22	2.2	ss	vacuum	900			c	Fm-3m	8.3769						73.4785
Ba2DyReO6	Ba	Dy	Re	O	s	f	d	1.61	0.912	0.58	0.746	0.332	0.991795	1.06099	2	3	5	2	Ba2	Dy3	Re5	0		2	10.0038	22.93	51.9	0.89	1.22	1.9	ss	ampoule	1000			c	Fm-3m	8.391						73.8501			rs
Ba2DyReO6	Ba	Dy	Re	O	s	f	d	1.61	0.912	0.58	0.746	0.332	0.991795	1.06099	2	3	5	2	Ba2	Dy3	Re5	0		2	10.0038	22.93	51.9	0.89	1.22	1.9	ss	vacuum	1100			m	P21/n	5.934	5.933	8.391		90		73.8543			rs?
Ba2DyRuO6	Ba	Dy	Ru	O	s	f	d	1.61	0.912	0.565	0.7385	0.347	0.995273	1.06471	2	3	5	2	Ba2	Dy3	Ru5	0		3	10.0038	22.93	59	0.89	1.22	2.2	ss	air	1200			c		4.179						72.9822			d	0
Ba2DyRuO6	Ba	Dy	Ru	O	s	f	d	1.61	0.912	0.565	0.7385	0.347	0.995273	1.06471	2	3	5	2	Ba2	Dy3	Ru5	0		3	10.0038	22.93	59	0.89	1.22	2.2	ss	air	1140			c	Fm-3m	8.3604						73.0451			rs
Ba2DySbO6	Ba	Dy	Sb	O	s	f	p	1.61	0.912	0.6	0.756	0.312	0.987195	1.05607	2	3	5	2	Ba2	Dy3	Sb5	0		10	10.0038	22.93	55	0.89	1.22	2.05			1400			c		4.208						74.5122
Ba2DySbO6	Ba	Dy	Sb	O	s	f	p	1.61	0.912	0.6	0.756	0.312	0.987195	1.05607	2	3	5	2	Ba2	Dy3	Sb5	0		10	10.0038	22.93	55	0.89	1.22	2.05	ss	air				c		4.21						74.6185					white
Ba2DySbO6	Ba	Dy	Sb	O	s	f	p	1.61	0.912	0.6	0.756	0.312	0.987195	1.05607	2	3	5	2	Ba2	Dy3	Sb5	0		10	10.0038	22.93	55	0.89	1.22	2.05	ss	air	1400			c	Fm-3m	8.4247						74.7435			rs
Ba2DySbO6	Ba	Dy	Sb	O	s	f	p	1.61	0.912	0.6	0.756	0.312	0.987195	1.05607	2	3	5	2	Ba2	Dy3	Sb5	0		10	10.0038	22.93	55	0.89	1.22	2.05	ss	air	273			c	Fm-3m	8.431						74.9113			rs?		white-yellowish white-pale orange yellow
Ba2DyTaO6	Ba	Dy	Ta	O	s	f	d	1.61	0.912	0.64	0.776	0.272	0.978121	1.04636	2	3	5	2	Ba2	Dy3	Ta5	0		0	10.0038	22.93	48.272	0.89	1.22	1.5	ss	air	1400			c		8.42						74.6185			rs
Ba2DyTaO6	Ba	Dy	Ta	O	s	f	d	1.61	0.912	0.64	0.776	0.272	0.978121	1.04636	2	3	5	2	Ba2	Dy3	Ta5	0		0	10.0038	22.93	48.272	0.89	1.22	1.5						c		8.45						75.4189
Ba2DyTaO6	Ba	Dy	Ta	O	s	f	d	1.61	0.912	0.64	0.776	0.272	0.978121	1.04636	2	3	5	2	Ba2	Dy3	Ta5	0		0	10.0038	22.93	48.272	0.89	1.22	1.5	ss	air	1400			te	I4/m	5.97728		8.45899				75.5554	1.00069		rs
Ba2DyTaO6	Ba	Dy	Ta	O	s	f	d	1.61	0.912	0.64	0.776	0.272	0.978121	1.04636	2	3	5	2	Ba2	Dy3	Ta5	0		0	10.0038	22.93	48.272	0.89	1.22	1.5	ss	air	1300			c	Fm-3m	8.4571						75.6092			rs
Ba2DyTaO6	Ba	Dy	Ta	O	s	f	d	1.61	0.912	0.64	0.776	0.272	0.978121	1.04636	2	3	5	2	Ba2	Dy3	Ta5	0		0	10.0038	22.93	48.272	0.89	1.22	1.5	ss	air	1500			c	Fm-3m	?									rs
Ba2DyUO6	Ba	Dy	U	O	s	f	f	1.61	0.912	0.76	0.836	0.152	0.951875	1.01828	2	3	5	2	Ba2	Dy3	U5	0			10.0038	22.93	46	0.89	1.22	1.38			1300			c		8.65						80.9018			rs
Ba2DyWO6	Ba	Dy	W	O	s	f	d	1.61	0.912	0.62	0.766	0.292	0.982637	1.05119	2	3	5	2	Ba2	Dy3	W5	0		1	10.0038	22.93	51.6	0.89	1.22	2.36	ss		273			c	Fm-3m	8.3866						73.734
Ba2ErBiO6	Ba	Er	Bi	O	s	f	p	1.61	0.89	0.76	0.825	0.13	0.95658	1.02332	2	3	5	2	Ba2	Er3	Bi5	0		10	10.0038	22.74	54.856	0.89	1.24	2.02	ss	air	800			c		4.276						78.1831
Ba2ErBiO6	Ba	Er	Bi	O	s	f	p	1.61	0.89	0.76	0.825	0.13	0.95658	1.02332	2	3	5	2	Ba2	Er3	Bi5	0		10	10.0038	22.74	54.856	0.89	1.24	2.02	ss	air	1000			m													brown
Ba2ErIrO6	Ba	Er	Ir	O	s	f	d	1.61	0.89	0.57	0.73	0.32	0.999245	1.06896	2	3	5	2	Ba2	Er3	Ir5	0		4	10.0038	22.74	57	0.89	1.24	2.2	ss	air	1200			m	P21/n	5.8988	5.8899	8.3319		89.982		72.3695			rs	1
Ba2ErIrO6	Ba	Er	Ir	O	s	f	d	1.61	0.89	0.57	0.73	0.32	0.999245	1.06896	2	3	5	2	Ba2	Er3	Ir5	0		4	10.0038	22.74	57	0.89	1.24	2.2	ss	air	1300			c		8.35						72.7729			rs?		black
Ba2ErMoO6	Ba	Er	Mo	O	s	f	d	1.61	0.89	0.61	0.75	0.28	0.989949	1.05902	2	3	5	2	Ba2	Er3	Mo5	0		1	10.0038	22.74	54.4167	0.89	1.24	2.16	ss	H2/N2	1400			c		8.369						73.2708					black
Ba2ErMoO6	Ba	Er	Mo	O	s	f	d	1.61	0.89	0.61	0.75	0.28	0.989949	1.05902	2	3	5	2	Ba2	Er3	Mo5	0		1	10.0038	22.74	54.4167	0.89	1.24	2.16	ss	H2/N2	1300			c	Fm-3m	8.3717						73.3417			rs	1
Ba2ErNbO6	Ba	Er	Nb	O	s	f	d	1.61	0.89	0.64	0.765	0.25	0.983091	1.05168	2	3	5	2	Ba2	Er3	Nb5	0		0	10.0038	22.74	50.5728	0.89	1.24	1.6						c		4.208						74.5122			d	0
Ba2ErNbO6	Ba	Er	Nb	O	s	f	d	1.61	0.89	0.64	0.765	0.25	0.983091	1.05168	2	3	5	2	Ba2	Er3	Nb5	0		0	10.0038	22.74	50.5728	0.89	1.24	1.6	ss	air	1400			c	Fm-3m	8.4193						74.5999			rs
Ba2ErNbO6	Ba	Er	Nb	O	s	f	d	1.61	0.89	0.64	0.765	0.25	0.983091	1.05168	2	3	5	2	Ba2	Er3	Nb5	0		0	10.0038	22.74	50.5728	0.89	1.24	1.6	ss	air	1400			m	P21/n	5.9555	5.9538	8.4234		90.02		74.6689			rs
Ba2ErNbO6	Ba	Er	Nb	O	s	f	d	1.61	0.89	0.64	0.765	0.25	0.983091	1.05168	2	3	5	2	Ba2	Er3	Nb5	0		0	10.0038	22.74	50.5728	0.89	1.24	1.6	ss	air	1500					?	?	?	?	?	?				rs
Ba2ErOsO6	Ba	Er	Os	O	s	f	d	1.61	0.89	0.575	0.7325	0.315	0.998073	1.06771	2	3	5	2	Ba2	Er3	Os5	0		3	10.0038	22.74	55	0.89	1.24	2.2	ss	air	1400			c		8.34						72.5117					black
Ba2ErOsO6	Ba	Er	Os	O	s	f	d	1.61	0.89	0.575	0.7325	0.315	0.998073	1.06771	2	3	5	2	Ba2	Er3	Os5	0		3	10.0038	22.74	55	0.89	1.24	2.2	ss	vacuum	900			c	Fm-3m	8.3489						72.7441
Ba2ErReO6	Ba	Er	Re	O	s	f	d	1.61	0.89	0.58	0.735	0.31	0.996905	1.06646	2	3	5	2	Ba2	Er3	Re5	0		2	10.0038	22.74	51.9	0.89	1.24	1.9	ss	ampoule	1000			c	Fm-3m	8.354						72.8775			rs
Ba2ErReO6	Ba	Er	Re	O	s	f	d	1.61	0.89	0.58	0.735	0.31	0.996905	1.06646	2	3	5	2	Ba2	Er3	Re5	0		2	10.0038	22.74	51.9	0.89	1.24	1.9	ss	vacuum	1100			m	P21/n	5.9118	5.9126	8.3701		90		73.1423			rs?
Ba2ErReO6	Ba	Er	Re	O	s	f	d	1.61	0.89	0.58	0.735	0.31	0.996905	1.06646	2	3	5	2	Ba2	Er3	Re5	0		2	10.0038	22.74	51.9	0.89	1.24	1.9
Ba2ErRuO6	Ba	Er	Ru	O	s	f	d	1.61	0.89	0.565	0.7275	0.325	1.00042	1.07022	2	3	5	2	Ba2	Er3	Ru5	0		3	10.0038	22.74	59	0.89	1.24	2.2	ss	air	1200			c	Fm-3m	8.323						72.0692			rs
Ba2ErRuO6	Ba	Er	Ru	O	s	f	d	1.61	0.89	0.565	0.7275	0.325	1.00042	1.07022	2	3	5	2	Ba2	Er3	Ru5	0		3	10.0038	22.74	59	0.89	1.24	2.2	ss	air	1300			c	Fm-3m	?									rs
Ba2ErSbO6	Ba	Er	Sb	O	s	f	p	1.61	0.89	0.6	0.745	0.29	0.992257	1.06148	2	3	5	2	Ba2	Er3	Sb5	0		10	10.0038	22.74	55	0.89	1.24	2.05			1400			c		4.187						73.4022
Ba2ErSbO6	Ba	Er	Sb	O	s	f	p	1.61	0.89	0.6	0.745	0.29	0.992257	1.06148	2	3	5	2	Ba2	Er3	Sb5	0		10	10.0038	22.74	55	0.89	1.24	2.05	ss	air	1350			c	Fm-3m	8.396						73.9822			rs
Ba2ErSbO6	Ba	Er	Sb	O	s	f	p	1.61	0.89	0.6	0.745	0.29	0.992257	1.06148	2	3	5	2	Ba2	Er3	Sb5	0		10	10.0038	22.74	55	0.89	1.24	2.05	ss	air	273			c	Fm-3m	8.397						74.0086			rs?		white-yellowish white-pale orange yellow
Ba2ErSbO6	Ba	Er	Sb	O	s	f	p	1.61	0.89	0.6	0.745	0.29	0.992257	1.06148	2	3	5	2	Ba2	Er3	Sb5	0		10	10.0038	22.74	55	0.89	1.24	2.05
Ba2ErTaO6	Ba	Er	Ta	O	s	f	d	1.61	0.89	0.64	0.765	0.25	0.983091	1.05168	2	3	5	2	Ba2	Er3	Ta5	0		0	10.0038	22.74	48.272	0.89	1.24	1.5	ss	air	1400			c		8.398						74.0351			rs
Ba2ErTaO6	Ba	Er	Ta	O	s	f	d	1.61	0.89	0.64	0.765	0.25	0.983091	1.05168	2	3	5	2	Ba2	Er3	Ta5	0		0	10.0038	22.74	48.272	0.89	1.24	1.5	ss	air	1400			c	Fm-3m	8.42203						74.6724			rs
Ba2ErTaO6	Ba	Er	Ta	O	s	f	d	1.61	0.89	0.64	0.765	0.25	0.983091	1.05168	2	3	5	2	Ba2	Er3	Ta5	0		0	10.0038	22.74	48.272	0.89	1.24	1.5	ss	air	1300			c	Fm-3m	8.424						74.7249			rs
Ba2ErTaO6	Ba	Er	Ta	O	s	f	d	1.61	0.89	0.64	0.765	0.25	0.983091	1.05168	2	3	5	2	Ba2	Er3	Ta5	0		0	10.0038	22.74	48.272	0.89	1.24	1.5	ss	air	1500			c	Fm-3m	?									rs
Ba2ErUO6	Ba	Er	U	O	s	f	f	1.61	0.89	0.76	0.825	0.13	0.95658	1.02332	2	3	5	2	Ba2	Er3	U5	0			10.0038	22.74	46	0.89	1.24	1.38	ss	vacuum	1000			c	Fm-3m	8.67						81.4643			rs
Ba2EuBiO6	Ba	Eu	Bi	O	s	f	p	1.61	0.947	0.76	0.8535	0.187	0.944483	1.01038	2	3	5	2	Ba2	Eu3	Bi5	0		10	10.0038	24.92	54.856	0.89	0	2.02	ss	air	800			c		4.311						80.1187
Ba2EuBiO6	Ba	Eu	Bi	O	s	f	p	1.61	0.947	0.76	0.8535	0.187	0.944483	1.01038	2	3	5	2	Ba2	Eu3	Bi5	0		10	10.0038	24.92	54.856	0.89	0	2.02	ss	air	850			c	Fm-3m	8.643						80.7056			rs
Ba2EuBiO6	Ba	Eu	Bi	O	s	f	p	1.61	0.947	0.76	0.8535	0.187	0.944483	1.01038	2	3	5	2	Ba2	Eu3	Bi5	0		10	10.0038	24.92	54.856	0.89	0	2.02	ss	air	1000			m													brown
Ba2EuBiO6	Ba	Eu	Bi	O	s	f	p	1.61	0.947	0.76	0.8535	0.187	0.944483	1.01038	2	3	5	2	Ba2	Eu3	Bi5	0		10	10.0038	24.92	54.856	0.89	0	2.02	ss	air	850														rs
Ba2EuIrO6	Ba	Eu	Ir	O	s	f	d	1.61	0.947	0.57	0.7585	0.377	0.986051	1.05485	2	3	5	2	Ba2	Eu3	Ir5	0		4	10.0038	24.92	57	0.89	0	2.2	ss	air	1200			m	P21/n	5.9615	5.9588	8.4231		90.001		74.8043			rs	1
Ba2EuIrO6	Ba	Eu	Ir	O	s	f	d	1.61	0.947	0.57	0.7585	0.377	0.986051	1.05485	2	3	5	2	Ba2	Eu3	Ir5	0		4	10.0038	24.92	57	0.89	0	2.2	ss	air	1200			m	P21/n										rs	1	black
Ba2EuMoO6	Ba	Eu	Mo	O	s	f	d	1.61	0.947	0.61	0.7785	0.337	0.976999	1.04516	2	3	5	2	Ba2	Eu3	Mo5	0		1	10.0038	24.92	54.4167	0.89	0	2.16	ss	H2/N2	1100			c	Fm-3m	8.459						75.6601			rs
Ba2EuMoO6	Ba	Eu	Mo	O	s	f	d	1.61	0.947	0.61	0.7785	0.337	0.976999	1.04516	2	3	5	2	Ba2	Eu3	Mo5	0		1	10.0038	24.92	54.4167	0.89	0	2.16	ss	H2/N2	1300			c	Fm-3m	8.46131						75.7221			rs	1
Ba2EuMoO6	Ba	Eu	Mo	O	s	f	d	1.61	0.947	0.61	0.7785	0.337	0.976999	1.04516	2	3	5	2	Ba2	Eu3	Mo5	0		1	10.0038	24.92	54.4167	0.89	0	2.16	ss	H2/N2	1400			c		8.466						75.8481					black
Ba2EuNbO6	Ba	Eu	Nb	O	s	f	d	1.61	0.947	0.64	0.7935	0.307	0.970317	1.03801	2	3	5	2	Ba2	Eu3	Nb5	0		0	10.0038	24.92	50.5728	0.89	0	1.6						c		4.243						76.3869			d	0
Ba2EuNbO6	Ba	Eu	Nb	O	s	f	d	1.61	0.947	0.64	0.7935	0.307	0.970317	1.03801	2	3	5	2	Ba2	Eu3	Nb5	0		0	10.0038	24.92	50.5728	0.89	0	1.6						te		6.01		8.49				76.6649	0.998891
Ba2EuNbO6	Ba	Eu	Nb	O	s	f	d	1.61	0.947	0.64	0.7935	0.307	0.970317	1.03801	2	3	5	2	Ba2	Eu3	Nb5	0		0	10.0038	24.92	50.5728	0.89	0	1.6	ss	air	1400			m	P21/n	6.0035	6.0043	8.5242		90.108		76.8174			rs
Ba2EuNbO6	Ba	Eu	Nb	O	s	f	d	1.61	0.947	0.64	0.7935	0.307	0.970317	1.03801	2	3	5	2	Ba2	Eu3	Nb5	0		0	10.0038	24.92	50.5728	0.89	0	1.6	ss	air	1400			te	I4/m	6.00331		8.53163				76.8694	1.00491		rs
Ba2EuNbO6	Ba	Eu	Nb	O	s	f	d	1.61	0.947	0.64	0.7935	0.307	0.970317	1.03801	2	3	5	2	Ba2	Eu3	Nb5	0		0	10.0038	24.92	50.5728	0.89	0	1.6	ss	air	1500					?	?	?	?	?	?				rs
Ba2EuNbO6	Ba	Eu	Nb	O	s	f	d	1.61	0.947	0.64	0.7935	0.307	0.970317	1.03801	2	3	5	2	Ba2	Eu3	Nb5	0		0	10.0038	24.92	50.5728	0.89	0	1.6	ss	air	1350														rs
Ba2EuOsO6	Ba	Eu	Os	O	s	f	d	1.61	0.947	0.575	0.761	0.372	0.98491	1.05363	2	3	5	2	Ba2	Eu3	Os5	0		3	10.0038	24.92	55	0.89	0	2.2	ss	air	1350			c		8.43						74.8846					black
Ba2EuOsO6	Ba	Eu	Os	O	s	f	d	1.61	0.947	0.575	0.761	0.372	0.98491	1.05363	2	3	5	2	Ba2	Eu3	Os5	0		3	10.0038	24.92	55	0.89	0	2.2	ss	vacuum	900			c	Fm-3m	8.4336						74.9806
Ba2EuReO6	Ba	Eu	Re	O	s	f	d	1.61	0.947	0.58	0.7635	0.367	0.983772	1.05241	2	3	5	2	Ba2	Eu3	Re5	0		2	10.0038	24.92	51.9	0.89	0	1.9	ss	ampoule	1000			c	Fm-3m	8.438						75.098			rs
Ba2EuReO6	Ba	Eu	Re	O	s	f	d	1.61	0.947	0.58	0.7635	0.367	0.983772	1.05241	2	3	5	2	Ba2	Eu3	Re5	0		2	10.0038	24.92	51.9	0.89	0	1.9	ss	vacuum	1100			m	P21/n	5.9756	5.9737	8.4685		90		75.5738			rs?
Ba2EuRuO6	Ba	Eu	Ru	O	s	f	d	1.61	0.947	0.565	0.756	0.382	0.987195	1.05607	2	3	5	2	Ba2	Eu3	Ru5	0		3	10.0038	24.92	59	0.89	0	2.2	ss	air	1200			c		8.405						74.2204			rs
Ba2EuRuO6	Ba	Eu	Ru	O	s	f	d	1.61	0.947	0.565	0.756	0.382	0.987195	1.05607	2	3	5	2	Ba2	Eu3	Ru5	0		3	10.0038	24.92	59	0.89	0	2.2			1140			c		8.406						74.2469			rs	0.9
Ba2EuRuO6	Ba	Eu	Ru	O	s	f	d	1.61	0.947	0.565	0.756	0.382	0.987195	1.05607	2	3	5	2	Ba2	Eu3	Ru5	0		3	10.0038	24.92	59	0.89	0	2.2	ss	air	1200			c		4.206						74.406			d	0
Ba2EuSbO6	Ba	Eu	Sb	O	s	f	p	1.61	0.947	0.6	0.7735	0.347	0.979246	1.04757	2	3	5	2	Ba2	Eu3	Sb5	0		10	10.0038	24.92	55	0.89	0	2.05	ss	air				c		4.24						76.225					white
Ba2EuSbO6	Ba	Eu	Sb	O	s	f	p	1.61	0.947	0.6	0.7735	0.347	0.979246	1.04757	2	3	5	2	Ba2	Eu3	Sb5	0		10	10.0038	24.92	55	0.89	0	2.05	ss	air	273			c	Fm-3m	8.489						76.468			rs?		white-yellowish white-pale orange yellow
Ba2EuTaO6	Ba	Eu	Ta	O	s	f	d	1.61	0.947	0.64	0.7935	0.307	0.970317	1.03801	2	3	5	2	Ba2	Eu3	Ta5	0		0	10.0038	24.92	48.272	0.89	0	1.5	ss	air	1400			c		8.486						76.3869			rs
Ba2EuTaO6	Ba	Eu	Ta	O	s	f	d	1.61	0.947	0.64	0.7935	0.307	0.970317	1.03801	2	3	5	2	Ba2	Eu3	Ta5	0		0	10.0038	24.92	48.272	0.89	0	1.5	ss	air	1300			m	P21/n	6.0191	6.0152	8.4964		90		76.9054			rs
Ba2EuTaO6	Ba	Eu	Ta	O	s	f	d	1.61	0.947	0.64	0.7935	0.307	0.970317	1.03801	2	3	5	2	Ba2	Eu3	Ta5	0		0	10.0038	24.92	48.272	0.89	0	1.5	ss	air	1400			te	I4/m	6.00518		8.53106				76.9122	1.00453		rs
Ba2EuTaO6	Ba	Eu	Ta	O	s	f	d	1.61	0.947	0.64	0.7935	0.307	0.970317	1.03801	2	3	5	2	Ba2	Eu3	Ta5	0		0	10.0038	24.92	48.272	0.89	0	1.5						te		6.02		8.49				76.9202	0.997232
Ba2EuTaO6	Ba	Eu	Ta	O	s	f	d	1.61	0.947	0.64	0.7935	0.307	0.970317	1.03801	2	3	5	2	Ba2	Eu3	Ta5	0		0	10.0038	24.92	48.272	0.89	0	1.5	ss	air	1500			m	P21/n	?	?	?		?					rs
Ba2EuUO6	Ba	Eu	U	O	s	f	f	1.61	0.947	0.76	0.8535	0.187	0.944483	1.01038	2	3	5	2	Ba2	Eu3	U5	0			10.0038	24.92	46	0.89	0	1.38			1300			c		8.68						81.7465			rs
Ba2EuWO6	Ba	Eu	W	O	s	f	d	1.61	0.947	0.62	0.7835	0.327	0.974761	1.04277	2	3	5	2	Ba2	Eu3	W5	0		1	10.0038	24.92	51.6	0.89	0	2.36	ss		1000			c	Fm-3m	8.4256						74.7674
Ba2FeBiO6	Ba	Fe	Bi	O	s	d	p	1.61	0.645	0.76	0.7025	0.115	1.01231	1.08294	2	3	5	2	Ba2	Fe3	Bi5	0	5	10	10.0038	30.651	54.856	0.89	1.83	2.02	HP					~c		8.279						70.9322			rs
Ba2FeBiO6	Ba	Fe	Bi	O	s	d	p	1.61	0.645	0.76	0.7025	0.115	1.01231	1.08294	2	3	5	2	Ba2	Fe3	Bi5	0	5	10	10.0038	30.651	54.856	0.89	1.83	2.02	HP		900			c		8.279						70.9322			rs
Ba2FeBiO6	Ba	Fe	Bi	O	s	d	p	1.61	0.645	0.76	0.7025	0.115	1.01231	1.08294	2	3	5	2	Ba2	Fe3	Bi5	0	5	10	10.0038	30.651	54.856	0.89	1.83	2.02	HP	O2	900
Ba2FeMoO6	Ba	Fe	Mo	O	s	d	d	1.61	0.78	0.59	0.685	0.19	1.02081	1.09203	2	2	6	4	Ba2	Fe2	Mo6	0	6	0	10.0038	16.1992	68.827	0.89	1.83	2.16	ss	vacuum	1100			c	Fm-3m	8.0579						65.3997			rs?
Ba2FeMoO6	Ba	Fe	Mo	O	s	d	d	1.61	0.78	0.59	0.685	0.19	1.02081	1.09203	2	2	6	4	Ba2	Fe2	Mo6	0	6	0	10.0038	16.1992	68.827	0.89	1.83	2.16	ss	vacuum	1200			c	Fm-3m	8.059						65.4265			rs
Ba2FeMoO6	Ba	Fe	Mo	O	s	d	d	1.61	0.78	0.59	0.685	0.19	1.02081	1.09203	2	2	6	4	Ba2	Fe2	Mo6	0	6	0	10.0038	16.1992	68.827	0.89	1.83	2.16	ss	H2/Ar	1200			c	Fm-3m	8.061						65.4752			rs
Ba2FeMoO6	Ba	Fe	Mo	O	s	d	d	1.61	0.78	0.59	0.685	0.19	1.02081	1.09203	2	2	6	4	Ba2	Fe2	Mo6	0	6	0	10.0038	16.1992	68.827	0.89	1.83	2.16	ss	H2/Ar	1100			c	Fm-3m	8.062						65.4996			rs
Ba2FeMoO6	Ba	Fe	Mo	O	s	d	d	1.61	0.78	0.59	0.685	0.19	1.02081	1.09203	2	2	6	4	Ba2	Fe2	Mo6	0	6	0	10.0038	16.1992	68.827	0.89	1.83	2.16	ss	vacuum	1100			c		8.063						65.5239			rs?
Ba2FeMoO6	Ba	Fe	Mo	O	s	d	d	1.61	0.78	0.59	0.685	0.19	1.02081	1.09203	2	2	6	4	Ba2	Fe2	Mo6	0	6	0	10.0038	16.1992	68.827	0.89	1.83	2.16	ss	H2/Ar	1150			te	I4/mmm	5.70409		8.07014				65.6438	1.00041		rs
Ba2FeMoO6	Ba	Fe	Mo	O	s	d	d	1.61	0.78	0.59	0.685	0.19	1.02081	1.09203	2	2	6	4	Ba2	Fe2	Mo6	0	6	0	10.0038	16.1992	68.827	0.89	1.83	2.16	floating-zone	Ar				c	Fm-3m	8.0686						65.6606
Ba2FeMoO6	Ba	Fe	Mo	O	s	d	d	1.61	0.78	0.59	0.685	0.19	1.02081	1.09203	2	2	6	4	Ba2	Fe2	Mo6	0	6	0	10.0038	16.1992	68.827	0.89	1.83	2.16	ss	H2/Ar	1280			c	Fm-3m										rs
Ba2FeMoO6	Ba	Fe	Mo	O	s	d	d	1.61	0.78	0.59	0.685	0.19	1.02081	1.09203	2	2	6	4	Ba2	Fe2	Mo6	0	6	0	10.0038	16.1992	68.827	0.89	1.83	2.16	ss	H2/Ar	1200			c	Fm-3m	8.0697						65.6874			rs	1
Ba2FeMoO6	Ba	Fe	Mo	O	s	d	d	1.61	0.78	0.59	0.685	0.19	1.02081	1.09203	2	2	6	4	Ba2	Fe2	Mo6	0	6	0	10.0038	16.1992	68.827	0.89	1.83	2.16	ss	vacuum	1000			c		8.08						65.9393			rs		black
Ba2FeMoO6	Ba	Fe	Mo	O	s	d	d	1.61	0.78	0.59	0.685	0.19	1.02081	1.09203	2	2	6	4	Ba2	Fe2	Mo6	0	6	0	10.0038	16.1992	68.827	0.89	1.83	2.16																	rs?
Ba2FeMoO6	Ba	Fe	Mo	O	s	d	d	1.61	0.78	0.59	0.685	0.19	1.02081	1.09203	2	2	6	4	Ba2	Fe2	Mo6	0	6	0	10.0038	16.1992	68.827	0.89	1.83	2.16	ss	vacuum	1150														rs	0.97
Ba2FeMoO6	Ba	Fe	Mo	O	s	d	d	1.61	0.78	0.59	0.685	0.19	1.02081	1.09203	2	2	6	4	Ba2	Fe2	Mo6	0	6	0	10.0038	16.1992	68.827	0.89	1.83	2.16	ss	vacuum	273			c	Fm-3m										rs
Ba2FeNbO6	Ba	Fe	Nb	O	s	d	d	1.61	0.645	0.64	0.6425	0.005	1.04205	1.11475	2	3	5	2	Ba2	Fe3	Nb5	0	5	0	10.0038	30.651	50.5728	0.89	1.83	1.6	ss	air	1400			c		4.045						66.1844			d
Ba2FeNbO6	Ba	Fe	Nb	O	s	d	d	1.61	0.645	0.64	0.6425	0.005	1.04205	1.11475	2	3	5	2	Ba2	Fe3	Nb5	0	5	0	10.0038	30.651	50.5728	0.89	1.83	1.6	ss	air	1350			c		8.11						66.6765
Ba2FeNbO6	Ba	Fe	Nb	O	s	d	d	1.61	0.645	0.64	0.6425	0.005	1.04205	1.11475	2	3	5	2	Ba2	Fe3	Nb5	0	5	0	10.0038	30.651	50.5728	0.89	1.83	1.6	ss	air	1300			c	Fm-3m	8.1181						66.8764			rs	0.36
Ba2FeNbO6	Ba	Fe	Nb	O	s	d	d	1.61	0.645	0.64	0.6425	0.005	1.04205	1.11475	2	3	5	2	Ba2	Fe3	Nb5	0	5	0	10.0038	30.651	50.5728	0.89	1.83	1.6	ss	air	1200			c	Pm-3m	4.0626						67.0521			d?
Ba2FeOsO6	Ba	Fe	Os	O	s	d	d	1.61	0.78	0.545	0.6625	0.235	1.03195	1.10394	2	2	6	4	Ba2	Fe2	Os6	0	6	2	10.0038	16.1992	70.1	0.89	1.83	2.2						h
Ba2FeReO6	Ba	Fe	Re	O	s	d	d	1.61	0.645	0.58	0.6125	0.065	1.05759	1.13137	2	3	5	2	Ba2	Fe3	Re5	0	5	2	10.0038	30.651	51.9	0.89	1.83	1.9	hydrothermal		700			c	Fm-3m	8.05						65.2075			rs	0.9	black
Ba2FeReO6	Ba	Fe	Re	O	s	d	d	1.61	0.645	0.58	0.6125	0.065	1.05759	1.13137	2	3	5	2	Ba2	Fe3	Re5	0	5	2	10.0038	30.651	51.9	0.89	1.83	1.9	ss	vacuum	950			c	Fm-3m	8.0518						65.2513			rs	0.98
Ba2FeReO6	Ba	Fe	Re	O	s	d	d	1.61	0.645	0.58	0.6125	0.065	1.05759	1.13137	2	3	5	2	Ba2	Fe3	Re5	0	5	2	10.0038	30.651	51.9	0.89	1.83	1.9	ss	vacuum	960			c	Fm-3m	8.054						65.3048			rs
Ba2FeReO6	Ba	Fe	Re	O	s	d	d	1.61	0.645	0.58	0.6125	0.065	1.05759	1.13137	2	3	5	2	Ba2	Fe3	Re5	0	5	2	10.0038	30.651	51.9	0.89	1.83	1.9	ss	vacuum	960														rs?
Ba2FeReO6	Ba	Fe	Re	O	s	d	d	1.61	0.645	0.58	0.6125	0.065	1.05759	1.13137	2	3	5	2	Ba2	Fe3	Re5	0	5	2	10.0038	30.651	51.9	0.89	1.83	1.9	ss	Ar	1000			c	Fm-3m	8.05						65.2075			rs
Ba2FeReO6	Ba	Fe	Re	O	s	d	d	1.61	0.645	0.58	0.6125	0.065	1.05759	1.13137	2	3	5	2	Ba2	Fe3	Re5	0	5	2	10.0038	30.651	51.9	0.89	1.83	1.9	ss	vacuum	1200			c	Fm-3m	8.0435						65.0497			rs
Ba2FeReO6	Ba	Fe	Re	O	s	d	d	1.61	0.645	0.58	0.6125	0.065	1.05759	1.13137	2	3	5	2	Ba2	Fe3	Re5	0	5	2	10.0038	30.651	51.9	0.89	1.83	1.9								8.05						65.2075
Ba2FeReO6	Ba	Fe	Re	O	s	d	d	1.61	0.645	0.58	0.6125	0.065	1.05759	1.13137	2	3	5	2	Ba2	Fe3	Re5	0	5	2	10.0038	30.651	51.9	0.89	1.83	1.9	ss	ampoule	1000			c	Fm-3m	8.05						65.2075			rs
Ba2FeReO6	Ba	Fe	Re	O	s	d	d	1.61	0.645	0.58	0.6125	0.065	1.05759	1.13137	2	3	5	2	Ba2	Fe3	Re5	0	5	2	10.0038	30.651	51.9	0.89	1.83	1.9		vacuum	1000			c		8.05						65.2075			rs?
Ba2FeReO6	Ba	Fe	Re	O	s	d	d	1.61	0.645	0.58	0.6125	0.065	1.05759	1.13137	2	3	5	2	Ba2	Fe3	Re5	0	5	2	10.0038	30.651	51.9	0.89	1.83	1.9	ss	vacuum	1000			c		8.05						65.2075			rs		black-blue
Ba2FeReO6	Ba	Fe	Re	O	s	d	d	1.61	0.645	0.58	0.6125	0.065	1.05759	1.13137	2	3	5	2	Ba2	Fe3	Re5	0	5	2	10.0038	30.651	51.9	0.89	1.83	1.9	ss	N2	1000			c		8.05						65.2075			rs?
Ba2FeReO6	Ba	Fe	Re	O	s	d	d	1.61	0.645	0.58	0.6125	0.065	1.05759	1.13137	2	3	5	2	Ba2	Fe3	Re5	0	5	2	10.0038	30.651	51.9	0.89	1.83	1.9						c	Fm-3m	8.0571						65.3802			rs	0.99
Ba2FeReO6	Ba	Fe	Re	O	s	d	d	1.61	0.645	0.58	0.6125	0.065	1.05759	1.13137	2	3	5	2	Ba2	Fe3	Re5	0	5	2	10.0038	30.651	51.9	0.89	1.83	1.9	ss	vacuum	1000			te		5.7		8.05				65.3861	0.998633		rs		black-blue
Ba2FeReO6	Ba	Fe	Re	O	s	d	d	1.61	0.645	0.58	0.6125	0.065	1.05759	1.13137	2	3	5	2	Ba2	Fe3	Re5	0	5	2	10.0038	30.651	51.9	0.89	1.83	1.9	ss	vacuum	273			c	Fm-3m	8.059						65.4265			rs
Ba2FeReO6	Ba	Fe	Re	O	s	d	d	1.61	0.645	0.58	0.6125	0.065	1.05759	1.13137	2	3	5	2	Ba2	Fe3	Re5	0	5	2	10.0038	30.651	51.9	0.89	1.83	1.9	ss	vacuum	273			c	Fm-3m										rs
Ba2FeSbO6	Ba	Fe	Sb	O	s	d	p	1.61	0.645	0.6	0.6225	0.045	1.05236	1.12578	2	3	5	2	Ba2	Fe3	Sb5	0	5	10	10.0038	30.651	55	0.89	1.83	2.05			1400			c		4.092						68.5183
Ba2FeSbO6	Ba	Fe	Sb	O	s	d	p	1.61	0.645	0.6	0.6225	0.045	1.05236	1.12578	2	3	5	2	Ba2	Fe3	Sb5	0	5	10	10.0038	30.651	55	0.89	1.83	2.05						h
Ba2FeSbO6	Ba	Fe	Sb	O	s	d	p	1.61	0.645	0.6	0.6225	0.045	1.05236	1.12578	2	3	5	2	Ba2	Fe3	Sb5	0	5	10	10.0038	30.651	55	0.89	1.83	2.05						h
Ba2FeSbO6	Ba	Fe	Sb	O	s	d	p	1.61	0.645	0.6	0.6225	0.045	1.05236	1.12578	2	3	5	2	Ba2	Fe3	Sb5	0	5	10	10.0038	30.651	55	0.89	1.83	2.05						h
Ba2FeSbO6	Ba	Fe	Sb	O	s	d	p	1.61	0.645	0.6	0.6225	0.045	1.05236	1.12578	2	3	5	2	Ba2	Fe3	Sb5	0	5	10	10.0038	30.651	55	0.89	1.83	2.05
Ba2FeTaO6	Ba	Fe	Ta	O	s	d	d	1.61	0.645	0.64	0.6425	0.005	1.04205	1.11475	2	3	5	2	Ba2	Fe3	Ta5	0	5	0	10.0038	30.651	48.272	0.89	1.83	1.5	ss	air	1400			c		4.048						66.3318			d
Ba2FeTaO6	Ba	Fe	Ta	O	s	d	d	1.61	0.645	0.64	0.6425	0.005	1.04205	1.11475	2	3	5	2	Ba2	Fe3	Ta5	0	5	0	10.0038	30.651	48.272	0.89	1.83	1.5	nitrate	air				c		4.05						66.4301					dark brown
Ba2FeTaO6	Ba	Fe	Ta	O	s	d	d	1.61	0.645	0.64	0.6425	0.005	1.04205	1.11475	2	3	5	2	Ba2	Fe3	Ta5	0	5	0	10.0038	30.651	48.272	0.89	1.83	1.5	ss	air	1200			c	Pm-3m	4.064						67.1214			d?
Ba2FeUO6	Ba	Fe	U	O	s	d	f	1.61	0.645	0.76	0.7025	0.115	1.01231	1.08294	2	3	5	2	Ba2	Fe3	U5	0	5		10.0038	30.651	46	0.89	1.83	1.38	ss	vacuum	1000			c	Fm-3m	8.312						71.7838			rs
Ba2FeUO6	Ba	Fe	U	O	s	d	f	1.61	0.645	0.76	0.7025	0.115	1.01231	1.08294	2	3	5	2	Ba2	Fe3	U5	0	5		10.0038	30.651	46	0.89	1.83	1.38	ss		1100					8.358						72.9822			rs?		dark green
Ba2FeUO6	Ba	Fe	U	O	s	d	f	1.61	0.645	0.76	0.7025	0.115	1.01231	1.08294	2	3	5	2	Ba2	Fe3	U5	0	5		10.0038	30.651	46	0.89	1.83	1.38	ss					c	Fm-3m	8.361						73.0608			rs
Ba2FeUO6	Ba	Fe	U	O	s	d	f	1.61	0.645	0.76	0.7025	0.115	1.01231	1.08294	2	3	5	2	Ba2	Fe3	U5	0	5		10.0038	30.651	46	0.89	1.83	1.38	ss	vacuum	900			c	Fm-3m	8.363						73.1133			rs
Ba2FeUO6	Ba	Fe	U	O	s	d	f	1.61	0.645	0.76	0.7025	0.115	1.01231	1.08294	2	3	5	2	Ba2	Fe3	U5	0	5		10.0038	30.651	46	0.89	1.83	1.38	ss	He	1200			c		8.394						73.9294			rs
Ba2FeWO6	Ba	Fe	W	O	s	d	d	1.61	0.78	0.6	0.69	0.18	1.01837	1.08942	2	2	6	4	Ba2	Fe2	W6	0	6	0	10.0038	16.1992	64.77	0.89	1.83	2.36	ss	vacuum	1250			c		8.133						67.2454			rs
Ba2FeWO6	Ba	Fe	W	O	s	d	d	1.61	0.78	0.6	0.69	0.18	1.01837	1.08942	2	2	6	4	Ba2	Fe2	W6	0	6	0	10.0038	16.1992	64.77	0.89	1.83	2.36	ss	N2	1420			te	I4/m	5.7547		8.125				67.268	0.998357	178.613	rs	1
Ba2FeWO6	Ba	Fe	W	O	s	d	d	1.61	0.78	0.6	0.69	0.18	1.01837	1.08942	2	2	6	4	Ba2	Fe2	W6	0	6	0	10.0038	16.1992	64.77	0.89	1.83	2.36	ss	N2	273			te	I4/m	5.7479		8.1444				67.2694	1.00192		rs	1
Ba2FeWO6	Ba	Fe	W	O	s	d	d	1.61	0.78	0.6	0.69	0.18	1.01837	1.08942	2	2	6	4	Ba2	Fe2	W6	0	6	0	10.0038	16.1992	64.77	0.89	1.83	2.36	ss	vacuum	273			c	Fm-3m										rs
Ba2GaNbO6	Ba	Ga	Nb	O	s	p	d	1.61	0.62	0.64	0.63	0.02	1.04847	1.12162	2	3	5	2	Ba2	Ga3	Nb5	0	10	0	10.0038	30.7258	50.5728	0.89	1.81	1.6	HP		1400			c		4.025						65.2075			d
Ba2GaTaO6	Ba	Ga	Ta	O	s	p	d	1.61	0.62	0.64	0.63	0.02	1.04847	1.12162	2	3	5	2	Ba2	Ga3	Ta5	0	10	0	10.0038	30.7258	48.272	0.89	1.81	1.5	HP		1400			c		4.024						65.1589			d
Ba2GdBiO6	Ba	Gd	Bi	O	s	f	p	1.61	0.938	0.76	0.849	0.178	0.946372	1.0124	2	3	5	2	Ba2	Gd3	Bi5	0		10	10.0038	20.63	54.856	0.89	1.2	2.02	ss	air	800			c		4.306						79.8403
Ba2GdBiO6	Ba	Gd	Bi	O	s	f	p	1.61	0.938	0.76	0.849	0.178	0.946372	1.0124	2	3	5	2	Ba2	Gd3	Bi5	0		10	10.0038	20.63	54.856	0.89	1.2	2.02	ss	air	850			c	Fm-3m	8.626						80.2303			rs
Ba2GdBiO6	Ba	Gd	Bi	O	s	f	p	1.61	0.938	0.76	0.849	0.178	0.946372	1.0124	2	3	5	2	Ba2	Gd3	Bi5	0		10	10.0038	20.63	54.856	0.89	1.2	2.02	ss	air	1000			m													brown
Ba2GdBiO6	Ba	Gd	Bi	O	s	f	p	1.61	0.938	0.76	0.849	0.178	0.946372	1.0124	2	3	5	2	Ba2	Gd3	Bi5	0		10	10.0038	20.63	54.856	0.89	1.2	2.02	ss	air	850														rs
Ba2GdIrO6	Ba	Gd	Ir	O	s	f	d	1.61	0.938	0.57	0.754	0.368	0.988111	1.05705	2	3	5	2	Ba2	Gd3	Ir5	0		4	10.0038	20.63	57	0.89	1.2	2.2	ss	air	1100			c		8.41						74.3529			rs?		black
Ba2GdIrO6	Ba	Gd	Ir	O	s	f	d	1.61	0.938	0.57	0.754	0.368	0.988111	1.05705	2	3	5	2	Ba2	Gd3	Ir5	0		4	10.0038	20.63	57	0.89	1.2	2.2	ss	air	1200			m	P21/n	5.9504	5.9467	8.4108		90.005		74.4046			rs	1
Ba2GdIrO6	Ba	Gd	Ir	O	s	f	d	1.61	0.938	0.57	0.754	0.368	0.988111	1.05705	2	3	5	2	Ba2	Gd3	Ir5	0		4	10.0038	20.63	57	0.89	1.2	2.2	ss	air	1200			m	P21/n										rs	1	black
Ba2GdMoO6	Ba	Gd	Mo	O	s	f	d	1.61	0.938	0.61	0.774	0.328	0.979021	1.04732	2	3	5	2	Ba2	Gd3	Mo5	0		1	10.0038	20.63	54.4167	0.89	1.2	2.16	ss	H2/N2	1100			c	Fm-3m	8.4481						75.368			rs
Ba2GdMoO6	Ba	Gd	Mo	O	s	f	d	1.61	0.938	0.61	0.774	0.328	0.979021	1.04732	2	3	5	2	Ba2	Gd3	Mo5	0		1	10.0038	20.63	54.4167	0.89	1.2	2.16	ss	H2/N2	1300			c	Fm-3m	8.44816						75.3696			rs	1
Ba2GdMoO6	Ba	Gd	Mo	O	s	f	d	1.61	0.938	0.61	0.774	0.328	0.979021	1.04732	2	3	5	2	Ba2	Gd3	Mo5	0		1	10.0038	20.63	54.4167	0.89	1.2	2.16	ss	H2/N2	1400			c		8.454						75.526					black
Ba2GdMoO6	Ba	Gd	Mo	O	s	f	d	1.61	0.938	0.61	0.774	0.328	0.979021	1.04732	2	3	5	2	Ba2	Gd3	Mo5	0		1	10.0038	20.63	54.4167	0.89	1.2	2.16	ss	H2/N2	1200			c	Fm-3m	8.45509						75.5553			rs
Ba2GdNbO6	Ba	Gd	Nb	O	s	f	d	1.61	0.938	0.64	0.789	0.298	0.972312	1.04015	2	3	5	2	Ba2	Gd3	Nb5	0		0	10.0038	20.63	50.5728	0.89	1.2	1.6						c		4.242						76.3329			d	0
Ba2GdNbO6	Ba	Gd	Nb	O	s	f	d	1.61	0.938	0.64	0.789	0.298	0.972312	1.04015	2	3	5	2	Ba2	Gd3	Nb5	0		0	10.0038	20.63	50.5728	0.89	1.2	1.6	nitrate	air				te		5.99		8.51				76.3349	1.00459				light blue
Ba2GdNbO6	Ba	Gd	Nb	O	s	f	d	1.61	0.938	0.64	0.789	0.298	0.972312	1.04015	2	3	5	2	Ba2	Gd3	Nb5	0		0	10.0038	20.63	50.5728	0.89	1.2	1.6	ss	air	1400			m	P21/n	5.9962	5.9961	8.5119		90.05		76.5088			rs
Ba2GdNbO6	Ba	Gd	Nb	O	s	f	d	1.61	0.938	0.64	0.789	0.298	0.972312	1.04015	2	3	5	2	Ba2	Gd3	Nb5	0		0	10.0038	20.63	50.5728	0.89	1.2	1.6	ss	air	1350			te	I4/m	5.99856		8.52004				76.6436	1.00434		rs
Ba2GdNbO6	Ba	Gd	Nb	O	s	f	d	1.61	0.938	0.64	0.789	0.298	0.972312	1.04015	2	3	5	2	Ba2	Gd3	Nb5	0		0	10.0038	20.63	50.5728	0.89	1.2	1.6	ss	air	1500					?	?	?	?	?	?				rs
Ba2GdNbO6	Ba	Gd	Nb	O	s	f	d	1.61	0.938	0.64	0.789	0.298	0.972312	1.04015	2	3	5	2	Ba2	Gd3	Nb5	0		0	10.0038	20.63	50.5728	0.89	1.2	1.6
Ba2GdOsO6	Ba	Gd	Os	O	s	f	d	1.61	0.938	0.575	0.7565	0.363	0.986966	1.05582	2	3	5	2	Ba2	Gd3	Os5	0		3	10.0038	20.63	55	0.89	1.2	2.2	ss	vacuum	900			c	Fm-3m	8.4176						74.5547
Ba2GdOsO6	Ba	Gd	Os	O	s	f	d	1.61	0.938	0.575	0.7565	0.363	0.986966	1.05582	2	3	5	2	Ba2	Gd3	Os5	0		3	10.0038	20.63	55	0.89	1.2	2.2	ss	air	1400			c		8.42						74.6185					black
Ba2GdReO6	Ba	Gd	Re	O	s	f	d	1.61	0.938	0.58	0.759	0.358	0.985823	1.0546	2	3	5	2	Ba2	Gd3	Re5	0		2	10.0038	20.63	51.9	0.89	1.2	1.9	ss	ampoule	1000			c	Fm-3m	8.431						74.9113			rs
Ba2GdReO6	Ba	Gd	Re	O	s	f	d	1.61	0.938	0.58	0.759	0.358	0.985823	1.0546	2	3	5	2	Ba2	Gd3	Re5	0		2	10.0038	20.63	51.9	0.89	1.2	1.9	ss	vacuum	1100			m	P21/n	5.9602	5.9638	8.4329		90.025		74.9378			rs?
Ba2GdReO6	Ba	Gd	Re	O	s	f	d	1.61	0.938	0.58	0.759	0.358	0.985823	1.0546	2	3	5	2	Ba2	Gd3	Re5	0		2	10.0038	20.63	51.9	0.89	1.2	1.9
Ba2GdRuO6	Ba	Gd	Ru	O	s	f	d	1.61	0.938	0.565	0.7515	0.373	0.989259	1.05828	2	3	5	2	Ba2	Gd3	Ru5	0		3	10.0038	20.63	59	0.89	1.2	2.2	ss	air	1200			c		4.204						74.2999			d	0
Ba2GdRuO6	Ba	Gd	Ru	O	s	f	d	1.61	0.938	0.565	0.7515	0.373	0.989259	1.05828	2	3	5	2	Ba2	Gd3	Ru5	0		3	10.0038	20.63	59	0.89	1.2	2.2	ss	O2/Ar	1380
Ba2GdSbO6	Ba	Gd	Sb	O	s	f	p	1.61	0.938	0.6	0.769	0.338	0.981278	1.04974	2	3	5	2	Ba2	Gd3	Sb5	0		10	10.0038	20.63	55	0.89	1.2	2.05	ss	air	1530			c		8.488						76.441			rs
Ba2GdSbO6	Ba	Gd	Sb	O	s	f	p	1.61	0.938	0.6	0.769	0.338	0.981278	1.04974	2	3	5	2	Ba2	Gd3	Sb5	0		10	10.0038	20.63	55	0.89	1.2	2.05	ss	air/O2	1300			c		8.44						75.1514			rs
Ba2GdSbO6	Ba	Gd	Sb	O	s	f	p	1.61	0.938	0.6	0.769	0.338	0.981278	1.04974	2	3	5	2	Ba2	Gd3	Sb5	0		10	10.0038	20.63	55	0.89	1.2	2.05	ss	air				c		8.47						75.9557					white
Ba2GdSbO6	Ba	Gd	Sb	O	s	f	p	1.61	0.938	0.6	0.769	0.338	0.981278	1.04974	2	3	5	2	Ba2	Gd3	Sb5	0		10	10.0038	20.63	55	0.89	1.2	2.05	ss	air	273			c	Fm-3m	8.474						76.0633			rs?		white-yellowish white-pale orange yellow
Ba2GdSbO6	Ba	Gd	Sb	O	s	f	p	1.61	0.938	0.6	0.769	0.338	0.981278	1.04974	2	3	5	2	Ba2	Gd3	Sb5	0		10	10.0038	20.63	55	0.89	1.2	2.05	ss	air	1400			c	Fm-3m										rs
Ba2GdTaO6	Ba	Gd	Ta	O	s	f	d	1.61	0.938	0.64	0.789	0.298	0.972312	1.04015	2	3	5	2	Ba2	Gd3	Ta5	0		0	10.0038	20.63	48.272	0.89	1.2	1.5	ss	air	1400			c		8.47						75.9557			rs
Ba2GdTaO6	Ba	Gd	Ta	O	s	f	d	1.61	0.938	0.64	0.789	0.298	0.972312	1.04015	2	3	5	2	Ba2	Gd3	Ta5	0		0	10.0038	20.63	48.272	0.89	1.2	1.5	nitrate	air				te		5.99		8.51				76.3349	1.00459				white
Ba2GdTaO6	Ba	Gd	Ta	O	s	f	d	1.61	0.938	0.64	0.789	0.298	0.972312	1.04015	2	3	5	2	Ba2	Gd3	Ta5	0		0	10.0038	20.63	48.272	0.89	1.2	1.5	ss	air	1400			te	I4/m	6.00032		8.51793				76.6695	1.00379		rs
Ba2GdTaO6	Ba	Gd	Ta	O	s	f	d	1.61	0.938	0.64	0.789	0.298	0.972312	1.04015	2	3	5	2	Ba2	Gd3	Ta5	0		0	10.0038	20.63	48.272	0.89	1.2	1.5	ss	air	1300			m	P21/n	6.015	6.013	8.4852		90		76.7236			rs
Ba2GdTaO6	Ba	Gd	Ta	O	s	f	d	1.61	0.938	0.64	0.789	0.298	0.972312	1.04015	2	3	5	2	Ba2	Gd3	Ta5	0		0	10.0038	20.63	48.272	0.89	1.2	1.5	ss	air	1500			m	P21/n	?	?	?		?					rs
Ba2GdUO6	Ba	Gd	U	O	s	f	f	1.61	0.938	0.76	0.849	0.178	0.946372	1.0124	2	3	5	2	Ba2	Gd3	U5	0			10.0038	20.63	46	0.89	1.2	1.38	ss	air	900					6.12	8.714	5.967				79.575			rs
Ba2GdUO6	Ba	Gd	U	O	s	f	f	1.61	0.938	0.76	0.849	0.178	0.946372	1.0124	2	3	5	2	Ba2	Gd3	U5	0			10.0038	20.63	46	0.89	1.2	1.38			1300			c		8.66						81.1827			rs
Ba2GdUO6	Ba	Gd	U	O	s	f	f	1.61	0.938	0.76	0.849	0.178	0.946372	1.0124	2	3	5	2	Ba2	Gd3	U5	0			10.0038	20.63	46	0.89	1.2	1.38	ss	Ar	1300			c		8.738						83.3962
Ba2GdWO6	Ba	Gd	W	O	s	f	d	1.61	0.938	0.62	0.779	0.318	0.976774	1.04492	2	3	5	2	Ba2	Gd3	W5	0		1	10.0038	20.63	51.6	0.89	1.2	2.36	ss		1000			c	Fm-3m	8.416						74.5122
Ba2GeUO6	Ba	Ge	U	O	s	p	f	1.61	0.53	0.89	0.71	0.36	1.00872	1.07909	2	4	4	0	Ba2	Ge4	U4	0	10		10.0038	45.7155	36.7	0.89	2.01	1.38			1300			c		8.56						78.4028			rs
Ba2HfUO6	Ba	Hf	U	O	s	d	f	1.61	0.71	0.89	0.8	0.18	0.967451	1.03495	2	4	4	0	Ba2	Hf4	U4	0	0		10.0038	33.37	36.7	0.89	1.3	1.38			1300			c		8.31						71.732			rs
Ba2HgUO6	Ba	Hg	U	O	s	d	f	1.61	1.02	0.73	0.875	0.29	0.935557	1.00083	2	2	6	4	Ba2	Hg2	U6	0	10		10.0038	18.7569	62	0.89	2	1.38			1300			c		8.83						86.0582			rs
Ba2HoBiO6	Ba	Ho	Bi	O	s	f	p	1.61	0.901	0.76	0.8305	0.141	0.954222	1.0208	2	3	5	2	Ba2	Ho3	Bi5	0		10	10.0038	22.84	54.856	0.89	1.23	2.02	ss	air	800			c		4.276						78.1831
Ba2HoBiO6	Ba	Ho	Bi	O	s	f	p	1.61	0.901	0.76	0.8305	0.141	0.954222	1.0208	2	3	5	2	Ba2	Ho3	Bi5	0		10	10.0038	22.84	54.856	0.89	1.23	2.02	ss	air	1000			m													brown
Ba2HoIrO6	Ba	Ho	Ir	O	s	f	d	1.61	0.901	0.57	0.7355	0.331	0.996671	1.06621	2	3	5	2	Ba2	Ho3	Ir5	0		4	10.0038	22.84	57	0.89	1.23	2.2	ss	air	1200			o		5.905	5.893	8.34				72.5542			d	0
Ba2HoIrO6	Ba	Ho	Ir	O	s	f	d	1.61	0.901	0.57	0.7355	0.331	0.996671	1.06621	2	3	5	2	Ba2	Ho3	Ir5	0		4	10.0038	22.84	57	0.89	1.23	2.2	ss	air	1200			m	P21/n	5.9139	5.9048	8.3501		89.981		72.8972			rs	1
Ba2HoIrO6	Ba	Ho	Ir	O	s	f	d	1.61	0.901	0.57	0.7355	0.331	0.996671	1.06621	2	3	5	2	Ba2	Ho3	Ir5	0		4	10.0038	22.84	57	0.89	1.23	2.2	ss	air	1200			c	Fm-3m										rs?
Ba2HoMoO6	Ba	Ho	Mo	O	s	f	d	1.61	0.901	0.61	0.7555	0.291	0.987424	1.05631	2	3	5	2	Ba2	Ho3	Mo5	0		1	10.0038	22.84	54.4167	0.89	1.23	2.16	ss	H2/N2	1400			c		8.387						73.7446					black
Ba2HoNbO6	Ba	Ho	Nb	O	s	f	d	1.61	0.901	0.64	0.7705	0.261	0.9806	1.04901	2	3	5	2	Ba2	Ho3	Nb5	0		0	10.0038	22.84	50.5728	0.89	1.23	1.6						c		4.216						74.9379			d	0
Ba2HoNbO6	Ba	Ho	Nb	O	s	f	d	1.61	0.901	0.64	0.7705	0.261	0.9806	1.04901	2	3	5	2	Ba2	Ho3	Nb5	0		0	10.0038	22.84	50.5728	0.89	1.23	1.6	ss	air	1400			m	P21/n	5.9653	5.9644	8.4396		90.042		75.069			rs
Ba2HoNbO6	Ba	Ho	Nb	O	s	f	d	1.61	0.901	0.64	0.7705	0.261	0.9806	1.04901	2	3	5	2	Ba2	Ho3	Nb5	0		0	10.0038	22.84	50.5728	0.89	1.23	1.6	ss	air	1500					?	?	?	?	?	?				rs
Ba2HoNbO6	Ba	Ho	Nb	O	s	f	d	1.61	0.901	0.64	0.7705	0.261	0.9806	1.04901	2	3	5	2	Ba2	Ho3	Nb5	0		0	10.0038	22.84	50.5728	0.89	1.23	1.6	ss	air	1510			c											rs	?
Ba2HoNbO6	Ba	Ho	Nb	O	s	f	d	1.61	0.901	0.64	0.7705	0.261	0.9806	1.04901	2	3	5	2	Ba2	Ho3	Nb5	0		0	10.0038	22.84	50.5728	0.89	1.23	1.6	ss	air	1350														rs
Ba2HoOsO6	Ba	Ho	Os	O	s	f	d	1.61	0.901	0.575	0.738	0.326	0.995506	1.06496	2	3	5	2	Ba2	Ho3	Os5	0		3	10.0038	22.84	55	0.89	1.23	2.2	ss	vacuum	900			c	Fm-3m	8.3589						73.0058
Ba2HoOsO6	Ba	Ho	Os	O	s	f	d	1.61	0.901	0.575	0.738	0.326	0.995506	1.06496	2	3	5	2	Ba2	Ho3	Os5	0		3	10.0038	22.84	55	0.89	1.23	2.2	ss	air	1370			c		8.36						73.0346					black
Ba2HoReO6	Ba	Ho	Re	O	s	f	d	1.61	0.901	0.58	0.7405	0.321	0.994343	1.06372	2	3	5	2	Ba2	Ho3	Re5	0		2	10.0038	22.84	51.9	0.89	1.23	1.9	ss	vacuum	1100			m	P21/n	5.921	5.921	8.3748		90		73.4014			rs?
Ba2HoReO6	Ba	Ho	Re	O	s	f	d	1.61	0.901	0.58	0.7405	0.321	0.994343	1.06372	2	3	5	2	Ba2	Ho3	Re5	0		2	10.0038	22.84	51.9	0.89	1.23	1.9	ss	ampoule	1000			c	Fm-3m	8.375						73.4285			rs
Ba2HoRuO6	Ba	Ho	Ru	O	s	f	d	1.61	0.901	0.565	0.733	0.336	0.997839	1.06746	2	3	5	2	Ba2	Ho3	Ru5	0		3	10.0038	22.84	59	0.89	1.23	2.2	ss	air	1200			c	Fm-3m	8.3419						72.5613			rs?
Ba2HoRuO6	Ba	Ho	Ru	O	s	f	d	1.61	0.901	0.565	0.733	0.336	0.997839	1.06746	2	3	5	2	Ba2	Ho3	Ru5	0		3	10.0038	22.84	59	0.89	1.23	2.2	flux		1250
Ba2HoSbO6	Ba	Ho	Sb	O	s	f	p	1.61	0.901	0.6	0.7505	0.301	0.989719	1.05877	2	3	5	2	Ba2	Ho3	Sb5	0		10	10.0038	22.84	55	0.89	1.23	2.05			1400			c		4.203						74.2469
Ba2HoSbO6	Ba	Ho	Sb	O	s	f	p	1.61	0.901	0.6	0.7505	0.301	0.989719	1.05877	2	3	5	2	Ba2	Ho3	Sb5	0		10	10.0038	22.84	55	0.89	1.23	2.05	ss	air	1400			c	Fm-3m	8.4119						74.4033			rs
Ba2HoSbO6	Ba	Ho	Sb	O	s	f	p	1.61	0.901	0.6	0.7505	0.301	0.989719	1.05877	2	3	5	2	Ba2	Ho3	Sb5	0		10	10.0038	22.84	55	0.89	1.23	2.05	ss	air	1300			c	Fm-3m	8.417						74.5387			rs	1
Ba2HoSbO6	Ba	Ho	Sb	O	s	f	p	1.61	0.901	0.6	0.7505	0.301	0.989719	1.05877	2	3	5	2	Ba2	Ho3	Sb5	0		10	10.0038	22.84	55	0.89	1.23	2.05	ss	air	273			c	Fm-3m	8.417						74.5387			rs?		white-yellowish white-pale orange yellow
Ba2HoSbO6	Ba	Ho	Sb	O	s	f	p	1.61	0.901	0.6	0.7505	0.301	0.989719	1.05877	2	3	5	2	Ba2	Ho3	Sb5	0		10	10.0038	22.84	55	0.89	1.23	2.05	ss
Ba2HoTaO6	Ba	Ho	Ta	O	s	f	d	1.61	0.901	0.64	0.7705	0.261	0.9806	1.04901	2	3	5	2	Ba2	Ho3	Ta5	0		0	10.0038	22.84	48.272	0.89	1.23	1.5	ss	air	1400			c	Fm-3m	8.40748						74.2861			rs
Ba2HoTaO6	Ba	Ho	Ta	O	s	f	d	1.61	0.901	0.64	0.7705	0.261	0.9806	1.04901	2	3	5	2	Ba2	Ho3	Ta5	0		0	10.0038	22.84	48.272	0.89	1.23	1.5	ss	air	1400			c		8.416						74.5122			rs
Ba2HoTaO6	Ba	Ho	Ta	O	s	f	d	1.61	0.901	0.64	0.7705	0.261	0.9806	1.04901	2	3	5	2	Ba2	Ho3	Ta5	0		0	10.0038	22.84	48.272	0.89	1.23	1.5	ss	air	1400			c	Fm-3m	8.43985						75.1474			rs
Ba2HoTaO6	Ba	Ho	Ta	O	s	f	d	1.61	0.901	0.64	0.7705	0.261	0.9806	1.04901	2	3	5	2	Ba2	Ho3	Ta5	0		0	10.0038	22.84	48.272	0.89	1.23	1.5	ss	air	1300			c	Fm-3m	8.4427						75.2236			rs
Ba2HoTaO6	Ba	Ho	Ta	O	s	f	d	1.61	0.901	0.64	0.7705	0.261	0.9806	1.04901	2	3	5	2	Ba2	Ho3	Ta5	0		0	10.0038	22.84	48.272	0.89	1.23	1.5	ss	air	1500			c	Fm-3m	?									rs
Ba2HoUO6	Ba	Ho	U	O	s	f	f	1.61	0.901	0.76	0.8305	0.141	0.954222	1.0208	2	3	5	2	Ba2	Ho3	U5	0			10.0038	22.84	46	0.89	1.23	1.38			1300			c		8.65						80.9018			rs
Ba2InBiO6	Ba	In	Bi	O	s	p	p	1.61	0.8	0.76	0.78	0.04	0.976326	1.04444	2	3	5	2	Ba2	In3	Bi5	0	10	10	10.0038	28.0441	54.856	0.89	1.78	2.02	ss	O2	1050			te	I4/mcm	5.9779		8.4752				75.7159	1.0025		d	0
Ba2InBiO6	Ba	In	Bi	O	s	p	p	1.61	0.8	0.76	0.78	0.04	0.976326	1.04444	2	3	5	2	Ba2	In3	Bi5	0	10	10	10.0038	28.0441	54.856	0.89	1.78	2.02	ss	air	800			c		4.248						76.6573
Ba2InIrO6	Ba	In	Ir	O	s	p	d	1.61	0.8	0.57	0.685	0.23	1.02081	1.09203	2	3	5	2	Ba2	In3	Ir5	0	10	4	10.0038	28.0441	57	0.89	1.78	2.2						h
Ba2InNbO6	Ba	In	Nb	O	s	p	d	1.61	0.8	0.64	0.72	0.16	1.00396	1.074	2	3	5	2	Ba2	In3	Nb5	0	10	0	10.0038	28.0441	50.5728	0.89	1.78	1.6	nitrate	air				c		4.14						70.9579					light blue
Ba2InNbO6	Ba	In	Nb	O	s	p	d	1.61	0.8	0.64	0.72	0.16	1.00396	1.074	2	3	5	2	Ba2	In3	Nb5	0	10	0	10.0038	28.0441	50.5728	0.89	1.78	1.6	ss	air	1230			c	Fm-3m	8.2819						71.0068			rs	0.52
Ba2InNbO6	Ba	In	Nb	O	s	p	d	1.61	0.8	0.64	0.72	0.16	1.00396	1.074	2	3	5	2	Ba2	In3	Nb5	0	10	0	10.0038	28.0441	50.5728	0.89	1.78	1.6	ss	air	1230			c	Fm-3m	8.2854						71.0969			rs/d?
Ba2InNbO6	Ba	In	Nb	O	s	p	d	1.61	0.8	0.64	0.72	0.16	1.00396	1.074	2	3	5	2	Ba2	In3	Nb5	0	10	0	10.0038	28.0441	50.5728	0.89	1.78	1.6	ss	air or Ar	1400			c		4.1454						71.236					white
Ba2InNbO6	Ba	In	Nb	O	s	p	d	1.61	0.8	0.64	0.72	0.16	1.00396	1.074	2	3	5	2	Ba2	In3	Nb5	0	10	0	10.0038	28.0441	50.5728	0.89	1.78	1.6	ss	air	1230			c	Pm-3m	4.1454						71.236			d	0
Ba2InOsO6	Ba	In	Os	O	s	p	d	1.61	0.8	0.575	0.6875	0.225	1.01959	1.09072	2	3	5	2	Ba2	In3	Os5	0	10	3	10.0038	28.0441	55	0.89	1.78	2.2						c		8.224						69.5279
Ba2InPuO6	Ba	In	Pu	O	s	p	f	1.61	0.8	0.74	0.77	0.06	0.980826	1.04926	2	3	5	2	Ba2	In3	Pu5	0	10		10.0038	28.0441	49	0.89	1.78	1.28	ss		950			c		8.5						76.7656
Ba2InReO6	Ba	In	Re	O	s	p	d	1.61	0.8	0.58	0.69	0.22	1.01837	1.08942	2	3	5	2	Ba2	In3	Re5	0	10	2	10.0038	28.0441	51.9	0.89	1.78	1.9	ss	ampoule	1000			c	Fm-3m	8.258						70.3938			rs
Ba2InReO6	Ba	In	Re	O	s	p	d	1.61	0.8	0.58	0.69	0.22	1.01837	1.08942	2	3	5	2	Ba2	In3	Re5	0	10	2	10.0038	28.0441	51.9	0.89	1.78	1.9						c		8.258						70.3938			rs
Ba2InRuO6	Ba	In	Ru	O	s	p	d	1.61	0.8	0.565	0.6825	0.235	1.02204	1.09334	2	3	5	2	Ba2	In3	Ru5	0	10	3	10.0038	28.0441	59	0.89	1.78	2.2						h
Ba2InSbO6	Ba	In	Sb	O	s	p	p	1.61	0.8	0.6	0.7	0.2	1.01352	1.08423	2	3	5	2	Ba2	In3	Sb5	0	10	10	10.0038	28.0441	55	0.89	1.78	2.05			1400			c		4.128						70.3427
Ba2InSbO6	Ba	In	Sb	O	s	p	p	1.61	0.8	0.6	0.7	0.2	1.01352	1.08423	2	3	5	2	Ba2	In3	Sb5	0	10	10	10.0038	28.0441	55	0.89	1.78	2.05	ss	air/O2	1300			c		4.13						70.445			d	0
Ba2InSbO6	Ba	In	Sb	O	s	p	p	1.61	0.8	0.6	0.7	0.2	1.01352	1.08423	2	3	5	2	Ba2	In3	Sb5	0	10	10	10.0038	28.0441	55	0.89	1.78	2.05	ss	air				c		4.13						70.445					grey
Ba2InSbO6	Ba	In	Sb	O	s	p	p	1.61	0.8	0.6	0.7	0.2	1.01352	1.08423	2	3	5	2	Ba2	In3	Sb5	0	10	10	10.0038	28.0441	55	0.89	1.78	2.05	ss	air	1100			c		8.269						70.6755					black
Ba2InSbO6	Ba	In	Sb	O	s	p	p	1.61	0.8	0.6	0.7	0.2	1.01352	1.08423	2	3	5	2	Ba2	In3	Sb5	0	10	10	10.0038	28.0441	55	0.89	1.78	2.05	ss	air	1300			c	Fm-3m	8.2938						71.3133			rs	0.78
Ba2InSbO6	Ba	In	Sb	O	s	p	p	1.61	0.8	0.6	0.7	0.2	1.01352	1.08423	2	3	5	2	Ba2	In3	Sb5	0	10	10	10.0038	28.0441	55	0.89	1.78	2.05	ss	air	1300			c		4.174						72.7206			d	0	black
Ba2InTaO6	Ba	In	Ta	O	s	p	d	1.61	0.8	0.64	0.72	0.16	1.00396	1.074	2	3	5	2	Ba2	In3	Ta5	0	10	0	10.0038	28.0441	48.272	0.89	1.78	1.5	ss	air	1400			c		8.282						71.0094			rs
Ba2InTaO6	Ba	In	Ta	O	s	p	d	1.61	0.8	0.64	0.72	0.16	1.00396	1.074	2	3	5	2	Ba2	In3	Ta5	0	10	0	10.0038	28.0441	48.272	0.89	1.78	1.5	ss	air	1500			c	Fm-3m	8.28279						71.0297			rs	1
Ba2InTaO6	Ba	In	Ta	O	s	p	d	1.61	0.8	0.64	0.72	0.16	1.00396	1.074	2	3	5	2	Ba2	In3	Ta5	0	10	0	10.0038	28.0441	48.272	0.89	1.78	1.5	nitrate	air				c		8.29						71.2153					white
Ba2InTaO6	Ba	In	Ta	O	s	p	d	1.61	0.8	0.64	0.72	0.16	1.00396	1.074	2	3	5	2	Ba2	In3	Ta5	0	10	0	10.0038	28.0441	48.272	0.89	1.78	1.5	ss	air	1200			c	Fm-3m	8.2964						71.3804			rs	<1
Ba2InUO6	Ba	In	U	O	s	p	f	1.61	0.8	0.76	0.78	0.04	0.976326	1.04444	2	3	5	2	Ba2	In3	U5	0	10		10.0038	28.0441	46	0.89	1.78	1.38	ss	vacuum	1000			c	Fm-3m	8.521						77.336			rs
Ba2InUO6	Ba	In	U	O	s	p	f	1.61	0.8	0.76	0.78	0.04	0.976326	1.04444	2	3	5	2	Ba2	In3	U5	0	10		10.0038	28.0441	46	0.89	1.78	1.38	ss		1100					8.54						77.8545					light brown
Ba2KIO6	Ba	K	I	O	s	s	p	1.61	1.38	0.53	0.955	0.85	0.903776	0.96683	2	1	7	6	Ba2	K1	I7	0	0	10	10.0038	4.34066	87.607	0.89	0.82	2.66	solution		400			c		8.49						76.495			rs		white
Ba2LaBiO6	Ba	La	Bi	O	s	d	p	1.61	1.032	0.76	0.896	0.272	0.927	0.991674	2	3	5	2	Ba2	La3	Bi5	0	0	10	10.0038	19.1773	54.856	0.89	1.1	2.02	ss	air	800			c		4.372						83.5681
Ba2LaBiO6	Ba	La	Bi	O	s	d	p	1.61	1.032	0.76	0.896	0.272	0.927	0.991674	2	3	5	2	Ba2	La3	Bi5	0	0	10	10.0038	19.1773	54.856	0.89	1.1	2.02	ss	air	850			c	Fm-3m	8.765						84.1716			rs
Ba2LaBiO6	Ba	La	Bi	O	s	d	p	1.61	1.032	0.76	0.896	0.272	0.927	0.991674	2	3	5	2	Ba2	La3	Bi5	0	0	10	10.0038	19.1773	54.856	0.89	1.1	2.02	ss	air	850														rs
Ba2LaIrO6	Ba	La	Ir	O	s	d	d	1.61	1.032	0.57	0.801	0.462	0.967011	1.03448	2	3	5	2	Ba2	La3	Ir5	0	0	4	10.0038	19.1773	57	0.89	1.1	2.2	ss	air	1200			o		6.041	6.046	8.541				77.9876			d	0
Ba2LaIrO6	Ba	La	Ir	O	s	d	d	1.61	1.032	0.57	0.801	0.462	0.967011	1.03448	2	3	5	2	Ba2	La3	Ir5	0	0	4	10.0038	19.1773	57	0.89	1.1	2.2	ss	air	1100			c		8.56						78.4028			rs?		black
Ba2LaIrO6	Ba	La	Ir	O	s	d	d	1.61	1.032	0.57	0.801	0.462	0.967011	1.03448	2	3	5	2	Ba2	La3	Ir5	0	0	4	10.0038	19.1773	57	0.89	1.1	2.2	ss	air	1200			m	I2/m	6.0481	6.0664	8.5634		90.256		78.5474			rs
Ba2LaIrO6	Ba	La	Ir	O	s	d	d	1.61	1.032	0.57	0.801	0.462	0.967011	1.03448	2	3	5	2	Ba2	La3	Ir5	0	0	4	10.0038	19.1773	57	0.89	1.1	2.2	ss	air	1250			r	R-3	6.0437			60.2984			78.5754			rs
Ba2LaIrO6	Ba	La	Ir	O	s	d	d	1.61	1.032	0.57	0.801	0.462	0.967011	1.03448	2	3	5	2	Ba2	La3	Ir5	0	0	4	10.0038	19.1773	57	0.89	1.1	2.2	ss	air	1200			r	R-3	6.04542			60.264			78.5818			rs?
Ba2LaIrO6	Ba	La	Ir	O	s	d	d	1.61	1.032	0.57	0.801	0.462	0.967011	1.03448	2	3	5	2	Ba2	La3	Ir5	0	0	4	10.0038	19.1773	57	0.89	1.1	2.2	ss	air	1200			m	P21/n	6.051	6.0603	8.5737		90.297		78.6002			rs	1
Ba2LaIrO6	Ba	La	Ir	O	s	d	d	1.61	1.032	0.57	0.801	0.462	0.967011	1.03448	2	3	5	2	Ba2	La3	Ir5	0	0	4	10.0038	19.1773	57	0.89	1.1	2.2	ss	air	1200			m	P21/n	6.051	6.0603	8.5737		90.297		78.6002		168.767	rs		black
Ba2LaMoO6	Ba	La	Mo	O	s	d	d	1.61	1.032	0.61	0.821	0.422	0.958303	1.02516	2	3	5	2	Ba2	La3	Mo5	0	0	1	10.0038	19.1773	54.4167	0.89	1.1	2.16	ss	H2/N2	1400			o													black
Ba2LaNbO6	Ba	La	Nb	O	s	d	d	1.61	1.032	0.64	0.836	0.392	0.951875	1.01828	2	3	5	2	Ba2	La3	Nb5	0	0	0	10.0038	19.1773	50.5728	0.89	1.1	1.6	ss	air	1400			r		4.29			90.3			78.9536			d
Ba2LaNbO6	Ba	La	Nb	O	s	d	d	1.61	1.032	0.64	0.836	0.392	0.951875	1.01828	2	3	5	2	Ba2	La3	Nb5	0	0	0	10.0038	19.1773	50.5728	0.89	1.1	1.6	ss	air	1400			r		6.06			60.37			79.34			rs
Ba2LaNbO6	Ba	La	Nb	O	s	d	d	1.61	1.032	0.64	0.836	0.392	0.951875	1.01828	2	3	5	2	Ba2	La3	Nb5	0	0	0	10.0038	19.1773	50.5728	0.89	1.1	1.6						te		4.298		4.337				80.1166	1.00907		d	0
Ba2LaNbO6	Ba	La	Nb	O	s	d	d	1.61	1.032	0.64	0.836	0.392	0.951875	1.01828	2	3	5	2	Ba2	La3	Nb5	0	0	0	10.0038	19.1773	50.5728	0.89	1.1	1.6	nitrate	air				m		6.14	6.09	8.6		90.33		80.3928					light blue
Ba2LaNbO6	Ba	La	Nb	O	s	d	d	1.61	1.032	0.64	0.836	0.392	0.951875	1.01828	2	3	5	2	Ba2	La3	Nb5	0	0	0	10.0038	19.1773	50.5728	0.89	1.1	1.6	ss	air	1400			m	P21/n	6.1407	6.0899	8.6031		90.32		80.4297			rs
Ba2LaNbO6	Ba	La	Nb	O	s	d	d	1.61	1.032	0.64	0.836	0.392	0.951875	1.01828	2	3	5	2	Ba2	La3	Nb5	0	0	0	10.0038	19.1773	50.5728	0.89	1.1	1.6	ss	air	1350			m	I2/m	6.14448	6.09131	8.604		90.348		80.506			rs
Ba2LaNbO6	Ba	La	Nb	O	s	d	d	1.61	1.032	0.64	0.836	0.392	0.951875	1.01828	2	3	5	2	Ba2	La3	Nb5	0	0	0	10.0038	19.1773	50.5728	0.89	1.1	1.6	ss	air	1500					?	?	?	?	?	?				rs
Ba2LaOsO6	Ba	La	Os	O	s	d	d	1.61	1.032	0.575	0.8035	0.457	0.965914	1.0333	2	3	5	2	Ba2	La3	Os5	0	0	3	10.0038	19.1773	55	0.89	1.1	2.2	ss	air	1300			r		6.04			60.2			78.2579					black
Ba2LaPuO6	Ba	La	Pu	O	s	d	f	1.61	1.032	0.74	0.886	0.292	0.931055	0.996012	2	3	5	2	Ba2	La3	Pu5	0	0		10.0038	19.1773	49	0.89	1.1	1.28	ss		950			~c?		8.63						80.342
Ba2LaReO6	Ba	La	Re	O	s	d	d	1.61	1.032	0.58	0.806	0.452	0.964819	1.03213	2	3	5	2	Ba2	La3	Re5	0	0	2	10.0038	19.1773	51.9	0.89	1.1	1.9	ss	ampoule	1100			c	Fm-3m	8.547						78.0461			rs
Ba2LaRuO6	Ba	La	Ru	O	s	d	d	1.61	1.032	0.565	0.7985	0.467	0.968111	1.03565	2	3	5	2	Ba2	La3	Ru5	0	0	3	10.0038	19.1773	59	0.89	1.1	2.2	ss	air	1200			c		8.545						77.9913			rs
Ba2LaRuO6	Ba	La	Ru	O	s	d	d	1.61	1.032	0.565	0.7985	0.467	0.968111	1.03565	2	3	5	2	Ba2	La3	Ru5	0	0	3	10.0038	19.1773	59	0.89	1.1	2.2	ss	air	1200			m	P21/n	6.0285	6.043	8.5409		90.44		77.7844			rs	1
Ba2LaRuO6	Ba	La	Ru	O	s	d	d	1.61	1.032	0.565	0.7985	0.467	0.968111	1.03565	2	3	5	2	Ba2	La3	Ru5	0	0	3	10.0038	19.1773	59	0.89	1.1	2.2						tr	I-1	6.0299	6.0587	8.5371	89.86	90.33	90.03	77.9707			rs
Ba2LaRuO6	Ba	La	Ru	O	s	d	d	1.61	1.032	0.565	0.7985	0.467	0.968111	1.03565	2	3	5	2	Ba2	La3	Ru5	0	0	3	10.0038	19.1773	59	0.89	1.1	2.2	ss	air	1200			c		4.273						78.0187			d	0
Ba2LaRuO6	Ba	La	Ru	O	s	d	d	1.61	1.032	0.565	0.7985	0.467	0.968111	1.03565	2	3	5	2	Ba2	La3	Ru5	0	0	3	10.0038	19.1773	59	0.89	1.1	2.2	ss	air	1350			r	R-3	6.03196			60.298			78.1177			rs
Ba2LaSbO6	Ba	La	Sb	O	s	d	p	1.61	1.032	0.6	0.816	0.432	0.960465	1.02747	2	3	5	2	Ba2	La3	Sb5	0	0	10	10.0038	19.1773	55	0.89	1.1	2.05			1400			c		4.305						79.7847
Ba2LaSbO6	Ba	La	Sb	O	s	d	p	1.61	1.032	0.6	0.816	0.432	0.960465	1.02747	2	3	5	2	Ba2	La3	Sb5	0	0	10	10.0038	19.1773	55	0.89	1.1	2.05	ss	air	1300			r	R-3	6.0825			60.292			80.087			rs
Ba2LaSbO6	Ba	La	Sb	O	s	d	p	1.61	1.032	0.6	0.816	0.432	0.960465	1.02747	2	3	5	2	Ba2	La3	Sb5	0	0	10	10.0038	19.1773	55	0.89	1.1	2.05	ss	air				m		6.08	6.11	8.68		90.38		80.6111					white
Ba2LaTaO6	Ba	La	Ta	O	s	d	d	1.61	1.032	0.64	0.836	0.392	0.951875	1.01828	2	3	5	2	Ba2	La3	Ta5	0	0	0	10.0038	19.1773	48.272	0.89	1.1	1.5	ss	air	1400			~c		4.29						78.9536			d
Ba2LaTaO6	Ba	La	Ta	O	s	d	d	1.61	1.032	0.64	0.836	0.392	0.951875	1.01828	2	3	5	2	Ba2	La3	Ta5	0	0	0	10.0038	19.1773	48.272	0.89	1.1	1.5	ss	air	1400			r		6.07			60.42			79.8226			rs
Ba2LaTaO6	Ba	La	Ta	O	s	d	d	1.61	1.032	0.64	0.836	0.392	0.951875	1.01828	2	3	5	2	Ba2	La3	Ta5	0	0	0	10.0038	19.1773	48.272	0.89	1.1	1.5	nitrate	air				m		6.14	6.09	8.61		90.4		80.4856					white
Ba2LaTaO6	Ba	La	Ta	O	s	d	d	1.61	1.032	0.64	0.836	0.392	0.951875	1.01828	2	3	5	2	Ba2	La3	Ta5	0	0	0	10.0038	19.1773	48.272	0.89	1.1	1.5	ss	air	1300			m	P21/n	6.1453	6.0946	8.6091		90.335		80.6081			rs
Ba2LaTaO6	Ba	La	Ta	O	s	d	d	1.61	1.032	0.64	0.836	0.392	0.951875	1.01828	2	3	5	2	Ba2	La3	Ta5	0	0	0	10.0038	19.1773	48.272	0.89	1.1	1.5	ss	air	1400			m	I2/m	6.1486	6.09643	8.6109		90.3447		80.6924			rs
Ba2LaTaO6	Ba	La	Ta	O	s	d	d	1.61	1.032	0.64	0.836	0.392	0.951875	1.01828	2	3	5	2	Ba2	La3	Ta5	0	0	0	10.0038	19.1773	48.272	0.89	1.1	1.5	ss	air	1500			m	P21/n	?	?	?		?					rs
Ba2LaUO6	Ba	La	U	O	s	d	f	1.61	1.032	0.76	0.896	0.272	0.927	0.991674	2	3	5	2	Ba2	La3	U5	0	0		10.0038	19.1773	46	0.89	1.1	1.38			1300			~c?		8.73						83.1673			rs
Ba2LiIO6	Ba	Li	I	O	s	s	p	1.61	0.76	0.53	0.645	0.23	1.04078	1.11339	2	1	7	6	Ba2	Li1	I7	0		10	10.0038	5.39171	87.607	0.89	0.98	2.66	solution					c		8.18						68.4179			rs		white
Ba2LiOsO6	Ba	Li	Os	O	s	s	d	1.61	0.76	0.525	0.6425	0.235	1.04205	1.11475	2	1	7	6	Ba2	Li1	Os7	0		1	10.0038	5.39171	85.1	0.89	0.98	2.2	ss	air	800			c		8.1						66.4301			rs
Ba2LiOsO6	Ba	Li	Os	O	s	s	d	1.61	0.76	0.525	0.6425	0.235	1.04205	1.11475	2	1	7	6	Ba2	Li1	Os7	0		1	10.0038	5.39171	85.1	0.89	0.98	2.2	flux	air	600			c	Fm-3m	8.1046						66.5434			rs?
Ba2LiReO6	Ba	Li	Re	O	s	s	d	1.61	0.76	0.53	0.645	0.23	1.04078	1.11339	2	1	7	6	Ba2	Li1	Re7	0		0	10.0038	5.39171	82.71	0.89	0.98	1.9						c		8.118						66.874			rs?
Ba2LiReO6	Ba	Li	Re	O	s	s	d	1.61	0.76	0.53	0.645	0.23	1.04078	1.11339	2	1	7	6	Ba2	Li1	Re7	0		0	10.0038	5.39171	82.71	0.89	0.98	1.9	ss	air	900			c		8.1183						66.8814			rs?		yellow
Ba2LiReO6	Ba	Li	Re	O	s	s	d	1.61	0.76	0.53	0.645	0.23	1.04078	1.11339	2	1	7	6	Ba2	Li1	Re7	0		0	10.0038	5.39171	82.71	0.89	0.98	1.9	flux / ss		750			c	Fm-3m	8.1214						66.958			rs		yellow/orange
Ba2LuBiO6	Ba	Lu	Bi	O	s	f	p	1.61	0.861	0.76	0.8105	0.101	0.962855	1.03003	2	3	5	2	Ba2	Lu3	Bi5	0	0	10	10.0038	20.959	54.856	0.89	1.27	2.02	ss	air	800			c		4.255						77.0369
Ba2LuBiO6	Ba	Lu	Bi	O	s	f	p	1.61	0.861	0.76	0.8105	0.101	0.962855	1.03003	2	3	5	2	Ba2	Lu3	Bi5	0	0	10	10.0038	20.959	54.856	0.89	1.27	2.02	ss	air	1050			c	Fm-3m	8.5154						77.1836			rs		light tan
Ba2LuBiO6	Ba	Lu	Bi	O	s	f	p	1.61	0.861	0.76	0.8105	0.101	0.962855	1.03003	2	3	5	2	Ba2	Lu3	Bi5	0	0	10	10.0038	20.959	54.856	0.89	1.27	2.02	ss	air	1000			c													brown
Ba2LuIrO6	Ba	Lu	Ir	O	s	f	d	1.61	0.861	0.57	0.7155	0.291	1.00609	1.07629	2	3	5	2	Ba2	Lu3	Ir5	0	0	4	10.0038	20.959	57	0.89	1.27	2.2	ss	air	1200			m	P21/n	5.8689	5.8608	8.2885		89.994		71.2737			rs	1
Ba2LuIrO6	Ba	Lu	Ir	O	s	f	d	1.61	0.861	0.57	0.7155	0.291	1.00609	1.07629	2	3	5	2	Ba2	Lu3	Ir5	0	0	4	10.0038	20.959	57	0.89	1.27	2.2	ss	air	1200			m	P21/n	5.8689	5.8608	8.2885		89.994		71.2737		174.1	rs		black
Ba2LuMoO6	Ba	Lu	Mo	O	s	f	d	1.61	0.861	0.61	0.7355	0.251	0.996671	1.06621	2	3	5	2	Ba2	Lu3	Mo5	0	0	1	10.0038	20.959	54.4167	0.89	1.27	2.16	ss	H2/N2	1400			c		8.321						72.0173					black
Ba2LuMoO6	Ba	Lu	Mo	O	s	f	d	1.61	0.861	0.61	0.7355	0.251	0.996671	1.06621	2	3	5	2	Ba2	Lu3	Mo5	0	0	1	10.0038	20.959	54.4167	0.89	1.27	2.16	ss	H2/Ar	1250			c	Fm-3m	8.3265						72.1602			rs	1	black
Ba2LuNbO6	Ba	Lu	Nb	O	s	f	d	1.61	0.861	0.64	0.7505	0.221	0.989719	1.05877	2	3	5	2	Ba2	Lu3	Nb5	0	0	0	10.0038	20.959	50.5728	0.89	1.27	1.6						c		4.187						73.4022			d	0
Ba2LuNbO6	Ba	Lu	Nb	O	s	f	d	1.61	0.861	0.64	0.7505	0.221	0.989719	1.05877	2	3	5	2	Ba2	Lu3	Nb5	0	0	0	10.0038	20.959	50.5728	0.89	1.27	1.6	ss	air	1400			m	P21/n	5.9248	5.9214	8.3735		90.015		73.4421			rs
Ba2LuNbO6	Ba	Lu	Nb	O	s	f	d	1.61	0.861	0.64	0.7505	0.221	0.989719	1.05877	2	3	5	2	Ba2	Lu3	Nb5	0	0	0	10.0038	20.959	50.5728	0.89	1.27	1.6	ss	air	1500					?	?	?	?	?	?				rs
Ba2LuOsO6	Ba	Lu	Os	O	s	f	d	1.61	0.861	0.575	0.718	0.286	1.00491	1.07502	2	3	5	2	Ba2	Lu3	Os5	0	0	3	10.0038	20.959	55	0.89	1.27	2.2	ss	air	1350			c		8.29						71.2153					black
Ba2LuOsO6	Ba	Lu	Os	O	s	f	d	1.61	0.861	0.575	0.718	0.286	1.00491	1.07502	2	3	5	2	Ba2	Lu3	Os5	0	0	3	10.0038	20.959	55	0.89	1.27	2.2	ss	vacuum	900			c	Fm-3m	8.2953						71.352
Ba2LuReO6	Ba	Lu	Re	O	s	f	d	1.61	0.861	0.58	0.7205	0.281	1.00372	1.07375	2	3	5	2	Ba2	Lu3	Re5	0	0	2	10.0038	20.959	51.9	0.89	1.27	1.9	ss	vacuum	1100			m	P21/n	5.88	5.88	8.3171		90.01		71.8897			rs?
Ba2LuRuO6	Ba	Lu	Ru	O	s	f	d	1.61	0.861	0.565	0.713	0.296	1.00728	1.07756	2	3	5	2	Ba2	Lu3	Ru5	0	0	3	10.0038	20.959	59	0.89	1.27	2.2	ss	air	1300			c	Fm-3m	8.272						70.7525			rs
Ba2LuSbO6	Ba	Lu	Sb	O	s	f	p	1.61	0.861	0.6	0.7305	0.261	0.99901	1.06871	2	3	5	2	Ba2	Lu3	Sb5	0	0	10	10.0038	20.959	55	0.89	1.27	2.05			1400			c		4.167						72.3553
Ba2LuSbO6	Ba	Lu	Sb	O	s	f	p	1.61	0.861	0.6	0.7305	0.261	0.99901	1.06871	2	3	5	2	Ba2	Lu3	Sb5	0	0	10	10.0038	20.959	55	0.89	1.27	2.05	ss	air				c		8.35						72.7729					white
Ba2LuTaO6	Ba	Lu	Ta	O	s	f	d	1.61	0.861	0.64	0.7505	0.221	0.989719	1.05877	2	3	5	2	Ba2	Lu3	Ta5	0	0	0	10.0038	20.959	48.272	0.89	1.27	1.5	ss	air	1400			c		8.354						72.8775			rs
Ba2LuTaO6	Ba	Lu	Ta	O	s	f	d	1.61	0.861	0.64	0.7505	0.221	0.989719	1.05877	2	3	5	2	Ba2	Lu3	Ta5	0	0	0	10.0038	20.959	48.272	0.89	1.27	1.5	ss	air	1400			c	Fm-3m	8.3737						73.3943			rs
Ba2LuTaO6	Ba	Lu	Ta	O	s	f	d	1.61	0.861	0.64	0.7505	0.221	0.989719	1.05877	2	3	5	2	Ba2	Lu3	Ta5	0	0	0	10.0038	20.959	48.272	0.89	1.27	1.5	ss	air	1300			c	Fm-3m	8.376						73.4548			rs
Ba2LuTaO6	Ba	Lu	Ta	O	s	f	d	1.61	0.861	0.64	0.7505	0.221	0.989719	1.05877	2	3	5	2	Ba2	Lu3	Ta5	0	0	0	10.0038	20.959	48.272	0.89	1.27	1.5	ss	air	1500			c	Fm-3m	?									rs
Ba2LuUO6	Ba	Lu	U	O	s	f	f	1.61	0.861	0.76	0.8105	0.101	0.962855	1.03003	2	3	5	2	Ba2	Lu3	U5	0	0		10.0038	20.959	46	0.89	1.27	1.38			1300			c		8.57						78.6778			rs
Ba2MgMoO6	Ba	Mg	Mo	O	s	s	d	1.61	0.72	0.59	0.655	0.13	1.03571	1.10797	2	2	6	4	Ba2	Mg2	Mo6	0		0	10.0038	15.0353	68.827	0.89	1.31	2.16						c	Fm-3m	8.08377						66.0316			rs
Ba2MgMoO6	Ba	Mg	Mo	O	s	s	d	1.61	0.72	0.59	0.655	0.13	1.03571	1.10797	2	2	6	4	Ba2	Mg2	Mo6	0		0	10.0038	15.0353	68.827	0.89	1.31	2.16	ss		1000			c		8.086						66.0863
Ba2MgMoO6	Ba	Mg	Mo	O	s	s	d	1.61	0.72	0.59	0.655	0.13	1.03571	1.10797	2	2	6	4	Ba2	Mg2	Mo6	0		0	10.0038	15.0353	68.827	0.89	1.31	2.16	ss		1350														rs?
Ba2MgNpO6	Ba	Mg	Np	O	s	s	f	1.61	0.72	0.72	0.72	0	1.00396	1.074	2	2	6	4	Ba2	Mg2	Np6	0			10.0038	15.0353	65	0.89	1.31	1.36	ss	air	1200			c	Fm-3m	8.35						72.7729			rs
Ba2MgOsO6	Ba	Mg	Os	O	s	s	d	1.61	0.72	0.545	0.6325	0.175	1.04718	1.12024	2	2	6	4	Ba2	Mg2	Os6	0		2	10.0038	15.0353	70.1	0.89	1.31	2.2			1000			c		8.08						65.9393			rs
Ba2MgPuO6	Ba	Mg	Pu	O	s	s	f	1.61	0.72	0.71	0.715	0.01	1.00633	1.07654	2	2	6	4	Ba2	Mg2	Pu6	0			10.0038	15.0353	80	0.89	1.31	1.28	ss	O2	1200			c	Fm-3m	8.3318						72.298			rs?
Ba2MgReO6	Ba	Mg	Re	O	s	s	d	1.61	0.72	0.55	0.635	0.17	1.04589	1.11886	2	2	6	4	Ba2	Mg2	Re6	0		1	10.0038	15.0353	67	0.89	1.31	1.9	hydrothermal		700			c	Fm-3m	8.0848						66.0568			rs	0.9	black
Ba2MgReO6	Ba	Mg	Re	O	s	s	d	1.61	0.72	0.55	0.635	0.17	1.04589	1.11886	2	2	6	4	Ba2	Mg2	Re6	0		1	10.0038	15.0353	67	0.89	1.31	1.9						c		8.082						65.9882			rs?
Ba2MgReO6	Ba	Mg	Re	O	s	s	d	1.61	0.72	0.55	0.635	0.17	1.04589	1.11886	2	2	6	4	Ba2	Mg2	Re6	0		1	10.0038	15.0353	67	0.89	1.31	1.9	ss	vacuum	1000			c		8.082						65.9882			rs		black-blue
Ba2MgReO6	Ba	Mg	Re	O	s	s	d	1.61	0.72	0.55	0.635	0.17	1.04589	1.11886	2	2	6	4	Ba2	Mg2	Re6	0		1	10.0038	15.0353	67	0.89	1.31	1.9	ss	vacuum	850			c	Fm-3m	8.0847						66.0544			rs
Ba2MgReO6	Ba	Mg	Re	O	s	s	d	1.61	0.72	0.55	0.635	0.17	1.04589	1.11886	2	2	6	4	Ba2	Mg2	Re6	0		1	10.0038	15.0353	67	0.89	1.31	1.9	ss	N2	1000			c		8.1						66.4301			rs?
Ba2MgSbO6	Ba	Mg	Sb	O	s	s	p	1.61	0.72		0.72	0.72	1.00396	1.074	2	2	6	4	Ba2	Mg2	Sb6	0		9	10.0038	15.0353	99.51	0.89	1.31	2.05						h
Ba2MgTeO6	Ba	Mg	Te	O	s	s	p	1.61	0.72	0.56	0.64	0.16	1.04333	1.11612	2	2	6	4	Ba2	Mg2	Te6	0		10	10.0038	15.0353	69.1	0.89	1.31	2.1			1100					8.13						67.171
Ba2MgTeO6	Ba	Mg	Te	O	s	s	p	1.61	0.72	0.56	0.64	0.16	1.04333	1.11612	2	2	6	4	Ba2	Mg2	Te6	0		10	10.0038	15.0353	69.1	0.89	1.31	2.1	ss	air	1100			c		8.13						67.171			rs?		yellow
Ba2MgUO6	Ba	Mg	U	O	s	s	f	1.61	0.72	0.73	0.725	0.01	1.0016	1.07147	2	2	6	4	Ba2	Mg2	U6	0			10.0038	15.0353	62	0.89	1.31	1.38	ss		1100					8.379						73.5337			rs?		yellow-orange
Ba2MgUO6	Ba	Mg	U	O	s	s	f	1.61	0.72	0.73	0.725	0.01	1.0016	1.07147	2	2	6	4	Ba2	Mg2	U6	0			10.0038	15.0353	62	0.89	1.31	1.38	ss	air	1200			c	Fm-3m	8.38						73.5601			rs
Ba2MgUO6	Ba	Mg	U	O	s	s	f	1.61	0.72	0.73	0.725	0.01	1.0016	1.07147	2	2	6	4	Ba2	Mg2	U6	0			10.0038	15.0353	62	0.89	1.31	1.38	ss	air	1000			c	Fm-3m	8.381						73.5864			rs		yellow-orange
Ba2MgUO6	Ba	Mg	U	O	s	s	f	1.61	0.72	0.73	0.725	0.01	1.0016	1.07147	2	2	6	4	Ba2	Mg2	U6	0			10.0038	15.0353	62	0.89	1.31	1.38	ss	air	1200			c		8.397						74.0086			rs?
Ba2MgWO6	Ba	Mg	W	O	s	s	d	1.61	0.72	0.6	0.66	0.12	1.0332	1.10528	2	2	6	4	Ba2	Mg2	W6	0		0	10.0038	15.0353	64.77	0.89	1.31	2.36						c	Fm-3m	8.09849						66.393			rs
Ba2MgWO6	Ba	Mg	W	O	s	s	d	1.61	0.72	0.6	0.66	0.12	1.0332	1.10528	2	2	6	4	Ba2	Mg2	W6	0		0	10.0038	15.0353	64.77	0.89	1.31	2.36						~c?		8.099						66.4055			rs
Ba2MgWO6	Ba	Mg	W	O	s	s	d	1.61	0.72	0.6	0.66	0.12	1.0332	1.10528	2	2	6	4	Ba2	Mg2	W6	0		0	10.0038	15.0353	64.77	0.89	1.31	2.36	ss	air	1250			c		8.099						66.4055			rs
Ba2MgWO6	Ba	Mg	W	O	s	s	d	1.61	0.72	0.6	0.66	0.12	1.0332	1.10528	2	2	6	4	Ba2	Mg2	W6	0		0	10.0038	15.0353	64.77	0.89	1.31	2.36	flux	air	950			c	Fm-3m	8.1046						66.5434			rs	1
Ba2MgWO6	Ba	Mg	W	O	s	s	d	1.61	0.72	0.6	0.66	0.12	1.0332	1.10528	2	2	6	4	Ba2	Mg2	W6	0		0	10.0038	15.0353	64.77	0.89	1.31	2.36	ss		1350			c	Fm-3m	8.10838						66.6365			rs
Ba2MgWO6	Ba	Mg	W	O	s	s	d	1.61	0.72	0.6	0.66	0.12	1.0332	1.10528	2	2	6	4	Ba2	Mg2	W6	0		0	10.0038	15.0353	64.77	0.89	1.31	2.36	ss	air	1200			c	Fm-3m	8.1345						67.2826			rs
Ba2MgWO6	Ba	Mg	W	O	s	s	d	1.61	0.72	0.6	0.66	0.12	1.0332	1.10528	2	2	6	4	Ba2	Mg2	W6	0		0	10.0038	15.0353	64.77	0.89	1.31	2.36	ss		1350														rs?
Ba2MnIrO6	Ba	Mn	Ir	O	s	d	d	1.61	0.53	0.625	0.5775	0.095	1.0763	1.1514	2	4	4	0	Ba2	Mn4	Ir4	0	3	5	10.0038	51.2	40	0.89	1.55	2.2						h
Ba2MnMoO6	Ba	Mn	Mo	O	s	d	d	1.61	0.83	0.59	0.71	0.24	1.00872	1.07909	2	2	6	4	Ba2	Mn2	Mo6	0	5	0	10.0038	15.64	68.827	0.89	1.55	2.16	ss	N2	1400			c	Fm-3m	8.168						68.1173			rs	1
Ba2MnNbO6	Ba	Mn	Nb	O	s	d	d	1.61	0.645	0.64	0.6425	0.005	1.04205	1.11475	2	3	5	2	Ba2	Mn3	Nb5	0	4	0	10.0038	33.668	50.5728	0.89	1.55	1.6	ss	air	1350			c		8.12						66.9234
Ba2MnNbO6	Ba	Mn	Nb	O	s	d	d	1.61	0.645	0.64	0.6425	0.005	1.04205	1.11475	2	3	5	2	Ba2	Mn3	Nb5	0	4	0	10.0038	33.668	50.5728	0.89	1.55	1.6	ss	air	1400			c		4.083						68.0672			d
Ba2MnOsO6	Ba	Mn	Os	O	s	d	d	1.61	0.83	0.545	0.6875	0.285	1.01959	1.09072	2	2	6	4	Ba2	Mn2	Os6	0	5	2	10.0038	15.64	70.1	0.89	1.55	2.2						h
Ba2MnPuO6	Ba	Mn	Pu	O	s	d	f	1.61	0.645	0.74	0.6925	0.095	1.01715	1.08812	2	3	5	2	Ba2	Mn3	Pu5	0	4		10.0038	33.668	49	0.89	1.55	1.28	ss		950			c		8.32						71.9913			rs?
Ba2MnReO6	Ba	Mn	Re	O	s	d	d	1.61	0.83	0.55	0.69	0.28	1.01837	1.08942	2	2	6	4	Ba2	Mn2	Re6	0	5	1	10.0038	15.64	67	0.89	1.55	1.9	ss	vacuum	1000			c	Fm-3m	8.16						67.9173			rs	1
Ba2MnReO6	Ba	Mn	Re	O	s	d	d	1.61	0.83	0.55	0.69	0.28	1.01837	1.08942	2	2	6	4	Ba2	Mn2	Re6	0	5	1	10.0038	15.64	67	0.89	1.55	1.9	hydrothermal		700			c	Fm-3m	8.181						68.443			rs	0.9	black
Ba2MnReO6	Ba	Mn	Re	O	s	d	d	1.61	0.83	0.55	0.69	0.28	1.01837	1.08942	2	2	6	4	Ba2	Mn2	Re6	0	5	1	10.0038	15.64	67	0.89	1.55	1.9	ss	vacuum	273			c	Fm-3m	8.177						68.3427			rs
Ba2MnReO6	Ba	Mn	Re	O	s	d	d	1.61	0.83	0.55	0.69	0.28	1.01837	1.08942	2	2	6	4	Ba2	Mn2	Re6	0	5	1	10.0038	15.64	67	0.89	1.55	1.9						c		8.18						68.4179			rs?
Ba2MnReO6	Ba	Mn	Re	O	s	d	d	1.61	0.83	0.55	0.69	0.28	1.01837	1.08942	2	2	6	4	Ba2	Mn2	Re6	0	5	1	10.0038	15.64	67	0.89	1.55	1.9	ss	vacuum	1000			c		8.18						68.4179			rs		black-blue
Ba2MnReO6	Ba	Mn	Re	O	s	d	d	1.61	0.83	0.55	0.69	0.28	1.01837	1.08942	2	2	6	4	Ba2	Mn2	Re6	0	5	1	10.0038	15.64	67	0.89	1.55	1.9	ss	N2	1000			?		8.18						68.4179			rs?
Ba2MnReO6	Ba	Mn	Re	O	s	d	d	1.61	0.83	0.55	0.69	0.28	1.01837	1.08942	2	2	6	4	Ba2	Mn2	Re6	0	5	1	10.0038	15.64	67	0.89	1.55	1.9								8.18						68.4179
Ba2MnReO6	Ba	Mn	Re	O	s	d	d	1.61	0.83	0.55	0.69	0.28	1.01837	1.08942	2	2	6	4	Ba2	Mn2	Re6	0	5	1	10.0038	15.64	67	0.89	1.55	1.9	ss	vacuum	1000			c	Fm-3m	8.1865						68.5812			rs	0.98
Ba2MnReO6	Ba	Mn	Re	O	s	d	d	1.61	0.83	0.55	0.69	0.28	1.01837	1.08942	2	2	6	4	Ba2	Mn2	Re6	0	5	1	10.0038	15.64	67	0.89	1.55	1.9																	rs?
Ba2MnRuO6	Ba	Mn	Ru	O	s	d	d	1.61	0.645	0.565	0.605	0.08	1.06154	1.1356	2	3	5	2	Ba2	Mn3	Ru5	0	4	3	10.0038	33.668	59	0.89	1.55	2.2						h
Ba2MnTaO6	Ba	Mn	Ta	O	s	d	d	1.61	0.645	0.64	0.6425	0.005	1.04205	1.11475	2	3	5	2	Ba2	Mn3	Ta5	0	4	0	10.0038	33.668	48.272	0.89	1.55	1.5	ss	air	1400			c		4.076						67.7178			d
Ba2MnTeO6	Ba	Mn	Te	O	s	d	p	1.61	0.83	0.56	0.695	0.27	1.01594	1.08682	2	2	6	4	Ba2	Mn2	Te6	0	5	10	10.0038	15.64	69.1	0.89	1.55	2.1			1100					8.19						68.6692
Ba2MnTeO6	Ba	Mn	Te	O	s	d	p	1.61	0.83	0.56	0.695	0.27	1.01594	1.08682	2	2	6	4	Ba2	Mn2	Te6	0	5	10	10.0038	15.64	69.1	0.89	1.55	2.1	flux					r	R-3m	5.817		14.244				69.568			rs
Ba2MnTeO6	Ba	Mn	Te	O	s	d	p	1.61	0.83	0.56	0.695	0.27	1.01594	1.08682	2	2	6	4	Ba2	Mn2	Te6	0	5	10	10.0038	15.64	69.1	0.89	1.55	2.1						r	R-3										rs?
Ba2MnUO6	Ba	Mn	U	O	s	d	f	1.61	0.83	0.73	0.78	0.1	0.976326	1.04444	2	2	6	4	Ba2	Mn2	U6	0	5		10.0038	15.64	62	0.89	1.55	1.38	ss		1100					8.465						75.8212			rs?		dark brown
Ba2MnUO6	Ba	Mn	U	O	s	d	f	1.61	0.83	0.73	0.78	0.1	0.976326	1.04444	2	2	6	4	Ba2	Mn2	U6	0	5		10.0038	15.64	62	0.89	1.55	1.38	ss	vacuum	900			c	Fm-3m	8.469						75.9288			rs
Ba2MnUO6	Ba	Mn	U	O	s	d	f	1.61	0.83	0.73	0.78	0.1	0.976326	1.04444	2	2	6	4	Ba2	Mn2	U6	0	5		10.0038	15.64	62	0.89	1.55	1.38	ss	Ar	1300			c		8.519						77.2816			rs?
Ba2MnUO6	Ba	Mn	U	O	s	d	f	1.61	0.83	0.73	0.78	0.1	0.976326	1.04444	2	2	6	4	Ba2	Mn2	U6	0	5		10.0038	15.64	62	0.89	1.55	1.38	ss	vacuum	1000			c	Fm-3m	8.52						77.3088			rs
Ba2MnUO6	Ba	Mn	U	O	s	d	f	1.61	0.83	0.73	0.78	0.1	0.976326	1.04444	2	2	6	4	Ba2	Mn2	U6	0	5		10.0038	15.64	62	0.89	1.55	1.38			1300			c		8.36/8.47									rs
Ba2MnWO6	Ba	Mn	W	O	s	d	d	1.61	0.83	0.6	0.715	0.23	1.00633	1.07654	2	2	6	4	Ba2	Mn2	W6	0	5	0	10.0038	15.64	64.77	0.89	1.55	2.36	ss	N2	273			c	Fm-3m	8.1985						68.8832			rs	1
Ba2MnWO6	Ba	Mn	W	O	s	d	d	1.61	0.83	0.6	0.715	0.23	1.00633	1.07654	2	2	6	4	Ba2	Mn2	W6	0	5	0	10.0038	15.64	64.77	0.89	1.55	2.36	ss	N2	800			c	Fm-3m										rs	0.96
Ba2NaIO6	Ba	Na	I	O	s	s	p	1.61	1.02	0.53	0.775	0.49	0.978571	1.04684	2	1	7	6	Ba2	Na1	I7	0		10	10.0038	5.13908	87.607	0.89	0.93	2.66	ss	air	400			c		8.33						72.2512			rs?		white
Ba2NaIO6	Ba	Na	I	O	s	s	p	1.61	1.02	0.53	0.775	0.49	0.978571	1.04684	2	1	7	6	Ba2	Na1	I7	0		10	10.0038	5.13908	87.607	0.89	0.93	2.66	solution					c		8.33						72.2512			rs		white
Ba2NaOsO6	Ba	Na	Os	O	s	s	d	1.61	1.02	0.525	0.7725	0.495	0.979697	1.04805	2	1	7	6	Ba2	Na1	Os7	0		1	10.0038	5.13908	85.1	0.89	0.93	2.2	flux																rs?
Ba2NaOsO6	Ba	Na	Os	O	s	s	d	1.61	1.02	0.525	0.7725	0.495	0.979697	1.04805	2	1	7	6	Ba2	Na1	Os7	0		1	10.0038	5.13908	85.1	0.89	0.93	2.2	ss	air	800			c		8.281						70.9837			rs
Ba2NaOsO6	Ba	Na	Os	O	s	s	d	1.61	1.02	0.525	0.7725	0.495	0.979697	1.04805	2	1	7	6	Ba2	Na1	Os7	0		1	10.0038	5.13908	85.1	0.89	0.93	2.2	flux	air	600				Fm-3m	8.287						71.1381			rs?
Ba2NaReO6	Ba	Na	Re	O	s	s	d	1.61	1.02	0.53	0.775	0.49	0.978571	1.04684	2	1	7	6	Ba2	Na1	Re7	0		0	10.0038	5.13908	82.71	0.89	0.93	1.9						c		8.296						71.3701			rs?
Ba2NaReO6	Ba	Na	Re	O	s	s	d	1.61	1.02	0.53	0.775	0.49	0.978571	1.04684	2	1	7	6	Ba2	Na1	Re7	0		0	10.0038	5.13908	82.71	0.89	0.93	1.9	ss	air	900			c		8.2963						71.3778			rs?		yellow
Ba2NaReO6	Ba	Na	Re	O	s	s	d	1.61	1.02	0.53	0.775	0.49	0.978571	1.04684	2	1	7	6	Ba2	Na1	Re7	0		0	10.0038	5.13908	82.71	0.89	0.93	1.9	flux / ss		750			c	Fm-3m	8.2975						71.4088			rs		yellow/orange
Ba2NdBiO6	Ba	Nd	Bi	O	s	f	p	1.61	0.983	0.76	0.8715	0.223	0.936998	1.00237	2	3	5	2	Ba2	Nd3	Bi5	0		10	10.0038	22.05	54.856	0.89	1.14	2.02	ss	air	800			c		4.337						81.5771
Ba2NdBiO6	Ba	Nd	Bi	O	s	f	p	1.61	0.983	0.76	0.8715	0.223	0.936998	1.00237	2	3	5	2	Ba2	Nd3	Bi5	0		10	10.0038	22.05	54.856	0.89	1.14	2.02	ss	air	850			c	Fm-3m	8.692						82.086			rs
Ba2NdBiO6	Ba	Nd	Bi	O	s	f	p	1.61	0.983	0.76	0.8715	0.223	0.936998	1.00237	2	3	5	2	Ba2	Nd3	Bi5	0		10	10.0038	22.05	54.856	0.89	1.14	2.02	ss	air	1000			m	I2/m	6.1776	6.1366	8.6686		89.801		82.155		163.893	rs	1	brown
Ba2NdBiO6	Ba	Nd	Bi	O	s	f	p	1.61	0.983	0.76	0.8715	0.223	0.936998	1.00237	2	3	5	2	Ba2	Nd3	Bi5	0		10	10.0038	22.05	54.856	0.89	1.14	2.02	ss	air	850														rs
Ba2NdIrO6	Ba	Nd	Ir	O	s	f	d	1.61	0.983	0.57	0.7765	0.413	0.977896	1.04612	2	3	5	2	Ba2	Nd3	Ir5	0		4	10.0038	22.05	57	0.89	1.14	2.2	ss	air	1200			m	P21/n	6.0008	5.9999	8.4843		90.042		76.3676			rs	1
Ba2NdIrO6	Ba	Nd	Ir	O	s	f	d	1.61	0.983	0.57	0.7765	0.413	0.977896	1.04612	2	3	5	2	Ba2	Nd3	Ir5	0		4	10.0038	22.05	57	0.89	1.14	2.2	ss	air	1100			c		8.49						76.495			rs?		black
Ba2NdMoO6	Ba	Nd	Mo	O	s	f	d	1.61	0.983	0.61	0.7965	0.373	0.968992	1.0366	2	3	5	2	Ba2	Nd3	Mo5	0		1	10.0038	22.05	54.4167	0.89	1.14	2.16	ss	H2/N2	1400			te		8.491		8.556				77.1078	1.00766				black
Ba2NdMoO6	Ba	Nd	Mo	O	s	f	d	1.61	0.983	0.61	0.7965	0.373	0.968992	1.0366	2	3	5	2	Ba2	Nd3	Mo5	0		1	10.0038	22.05	54.4167	0.89	1.14	2.16	ss	H2/N2	1300			te	I4/m	6.01412		8.57494				77.5381	1.00819		rs	1
Ba2NdNbO6	Ba	Nd	Nb	O	s	f	d	1.61	0.983	0.64	0.8115	0.343	0.96242	1.02957	2	3	5	2	Ba2	Nd3	Nb5	0		0	10.0038	22.05	50.5728	0.89	1.14	1.6	ss	air	1400			~c		4.27						77.8545			d
Ba2NdNbO6	Ba	Nd	Nb	O	s	f	d	1.61	0.983	0.64	0.8115	0.343	0.96242	1.02957	2	3	5	2	Ba2	Nd3	Nb5	0		0	10.0038	22.05	50.5728	0.89	1.14	1.6	ss	air	1400			r		6.04			60.07			78.0287			rs
Ba2NdNbO6	Ba	Nd	Nb	O	s	f	d	1.61	0.983	0.64	0.8115	0.343	0.96242	1.02957	2	3	5	2	Ba2	Nd3	Nb5	0		0	10.0038	22.05	50.5728	0.89	1.14	1.6						c		4.277						78.238			d	0
Ba2NdNbO6	Ba	Nd	Nb	O	s	f	d	1.61	0.983	0.64	0.8115	0.343	0.96242	1.02957	2	3	5	2	Ba2	Nd3	Nb5	0		0	10.0038	22.05	50.5728	0.89	1.14	1.6	ss	air	1400			m	P21/n	6.0764	6.0437	8.5365		90.133		78.3733			rs
Ba2NdNbO6	Ba	Nd	Nb	O	s	f	d	1.61	0.983	0.64	0.8115	0.343	0.96242	1.02957	2	3	5	2	Ba2	Nd3	Nb5	0		0	10.0038	22.05	50.5728	0.89	1.14	1.6						m		6.08	6.04	8.54		90.13		78.4038
Ba2NdNbO6	Ba	Nd	Nb	O	s	f	d	1.61	0.983	0.64	0.8115	0.343	0.96242	1.02957	2	3	5	2	Ba2	Nd3	Nb5	0		0	10.0038	22.05	50.5728	0.89	1.14	1.6	ss	air	1400			m	I2/m	6.0796	6.0452	8.53823		90.147		78.4498			rs
Ba2NdNbO6	Ba	Nd	Nb	O	s	f	d	1.61	0.983	0.64	0.8115	0.343	0.96242	1.02957	2	3	5	2	Ba2	Nd3	Nb5	0		0	10.0038	22.05	50.5728	0.89	1.14	1.6	ss	air	1350			m	I2/m	6.07918	6.04547	8.53909		90.134		78.4559			rs
Ba2NdNbO6	Ba	Nd	Nb	O	s	f	d	1.61	0.983	0.64	0.8115	0.343	0.96242	1.02957	2	3	5	2	Ba2	Nd3	Nb5	0		0	10.0038	22.05	50.5728	0.89	1.14	1.6	ss	air	1400			m	I2/m	6.08122	6.04673	8.54026		90.143		78.5093			rs
Ba2NdNbO6	Ba	Nd	Nb	O	s	f	d	1.61	0.983	0.64	0.8115	0.343	0.96242	1.02957	2	3	5	2	Ba2	Nd3	Nb5	0		0	10.0038	22.05	50.5728	0.89	1.14	1.6	ss	air	1500					?	?	?	?	?	?				rs
Ba2NdOsO6	Ba	Nd	Os	O	s	f	d	1.61	0.983	0.575	0.779	0.408	0.976774	1.04492	2	3	5	2	Ba2	Nd3	Os5	0		3	10.0038	22.05	55	0.89	1.14	2.2	ss	vacuum	1000			m	P21/n	5.995	6	8.48		90.02		76.2564			rs
Ba2NdOsO6	Ba	Nd	Os	O	s	f	d	1.61	0.983	0.575	0.779	0.408	0.976774	1.04492	2	3	5	2	Ba2	Nd3	Os5	0		3	10.0038	22.05	55	0.89	1.14	2.2	ss	air	1400			c		8.49						76.495					black
Ba2NdOsO6	Ba	Nd	Os	O	s	f	d	1.61	0.983	0.575	0.779	0.408	0.976774	1.04492	2	3	5	2	Ba2	Nd3	Os5	0		3	10.0038	22.05	55	0.89	1.14	2.2	ss	vacuum	900			c	Fm-3m	8.4909						76.5193
Ba2NdPuO6	Ba	Nd	Pu	O	s	f	f	1.61	0.983	0.74	0.8615	0.243	0.941141	1.0068	2	3	5	2	Ba2	Nd3	Pu5	0			10.0038	22.05	49	0.89	1.14	1.28	ss		950			c		8.66						81.1827
Ba2NdReO6	Ba	Nd	Re	O	s	f	d	1.61	0.983	0.58	0.7815	0.403	0.975655	1.04372	2	3	5	2	Ba2	Nd3	Re5	0		2	10.0038	22.05	51.9	0.89	1.14	1.9	ss	vacuum	1100			m	P21/n	6.0064	6.0067	8.5229		90.045		76.8736			rs?
Ba2NdReO6	Ba	Nd	Re	O	s	f	d	1.61	0.983	0.58	0.7815	0.403	0.975655	1.04372	2	3	5	2	Ba2	Nd3	Re5	0		2	10.0038	22.05	51.9	0.89	1.14	1.9	ss	ampoule	1000			c	Fm-3m	8.51						77.0369			rs
Ba2NdRuO6	Ba	Nd	Ru	O	s	f	d	1.61	0.983	0.565	0.774	0.418	0.979021	1.04732	2	3	5	2	Ba2	Nd3	Ru5	0		3	10.0038	22.05	59	0.89	1.14	2.2	ss	air	1200			c		4.234						75.9019			d	0
Ba2NdRuO6	Ba	Nd	Ru	O	s	f	d	1.61	0.983	0.565	0.774	0.418	0.979021	1.04732	2	3	5	2	Ba2	Nd3	Ru5	0		3	10.0038	22.05	59	0.89	1.14	2.2	ss	air	1300			m	P21/n	5.9888	5.9916	8.4667		90.026		75.9516			rs	1
Ba2NdRuO6	Ba	Nd	Ru	O	s	f	d	1.61	0.983	0.565	0.774	0.418	0.979021	1.04732	2	3	5	2	Ba2	Nd3	Ru5	0		3	10.0038	22.05	59	0.89	1.14	2.2	ss	air	1350			c	Fm-3m	8.47061						75.9721			rs
Ba2NdRuO6	Ba	Nd	Ru	O	s	f	d	1.61	0.983	0.565	0.774	0.418	0.979021	1.04732	2	3	5	2	Ba2	Nd3	Ru5	0		3	10.0038	22.05	59	0.89	1.14	2.2	ss	air	1300			m	P21/n	?	?	?		?					rs
Ba2NdSbO6	Ba	Nd	Sb	O	s	f	p	1.61	0.983	0.6	0.7915	0.383	0.971203	1.03896	2	3	5	2	Ba2	Nd3	Sb5	0		10	10.0038	22.05	55	0.89	1.14	2.05	ss	air	1350			r	R-3	6.0184			60.077			77.2068			rs
Ba2NdSbO6	Ba	Nd	Sb	O	s	f	p	1.61	0.983	0.6	0.7915	0.383	0.971203	1.03896	2	3	5	2	Ba2	Nd3	Sb5	0		10	10.0038	22.05	55	0.89	1.14	2.05			1400			c		4.271						77.9092
Ba2NdSbO6	Ba	Nd	Sb	O	s	f	p	1.61	0.983	0.6	0.7915	0.383	0.971203	1.03896	2	3	5	2	Ba2	Nd3	Sb5	0		10	10.0038	22.05	55	0.89	1.14	2.05	ss	air	273			c	Fm-3m	8.544						77.9639			rs?		white-yellowish white-pale orange yellow
Ba2NdSbO6	Ba	Nd	Sb	O	s	f	p	1.61	0.983	0.6	0.7915	0.383	0.971203	1.03896	2	3	5	2	Ba2	Nd3	Sb5	0		10	10.0038	22.05	55	0.89	1.14	2.05	ss	air				m		6.04	6.05	8.54		90.15		78.0169					white
Ba2NdSbO6	Ba	Nd	Sb	O	s	f	p	1.61	0.983	0.6	0.7915	0.383	0.971203	1.03896	2	3	5	2	Ba2	Nd3	Sb5	0		10	10.0038	22.05	55	0.89	1.14	2.05	ss	air	1300			r	R-3	6.04003			60.086			78.0581			rs
Ba2NdSbO6	Ba	Nd	Sb	O	s	f	p	1.61	0.983	0.6	0.7915	0.383	0.971203	1.03896	2	3	5	2	Ba2	Nd3	Sb5	0		10	10.0038	22.05	55	0.89	1.14	2.05	ss	air	1400			r	R-3	6.04069			60.0998			78.108			rs
Ba2NdTaO6	Ba	Nd	Ta	O	s	f	d	1.61	0.983	0.64	0.8115	0.343	0.96242	1.02957	2	3	5	2	Ba2	Nd3	Ta5	0		0	10.0038	22.05	48.272	0.89	1.14	1.5	ss	air	1400			~c		4.27						77.8545			d
Ba2NdTaO6	Ba	Nd	Ta	O	s	f	d	1.61	0.983	0.64	0.8115	0.343	0.96242	1.02957	2	3	5	2	Ba2	Nd3	Ta5	0		0	10.0038	22.05	48.272	0.89	1.14	1.5	ss	air	1400			r		6.04			60.07			78.0287			rs
Ba2NdTaO6	Ba	Nd	Ta	O	s	f	d	1.61	0.983	0.64	0.8115	0.343	0.96242	1.02957	2	3	5	2	Ba2	Nd3	Ta5	0		0	10.0038	22.05	48.272	0.89	1.14	1.5	ss	air	1400			m	I2/m	6.07821	6.04597	8.53967		90.1365		78.4552			rs
Ba2NdTaO6	Ba	Nd	Ta	O	s	f	d	1.61	0.983	0.64	0.8115	0.343	0.96242	1.02957	2	3	5	2	Ba2	Nd3	Ta5	0		0	10.0038	22.05	48.272	0.89	1.14	1.5	nitrate	air				m		6.08	6.05	8.54		90.14		78.5336					white
Ba2NdTaO6	Ba	Nd	Ta	O	s	f	d	1.61	0.983	0.64	0.8115	0.343	0.96242	1.02957	2	3	5	2	Ba2	Nd3	Ta5	0		0	10.0038	22.05	48.272	0.89	1.14	1.5	ss	air	1300			m	P21/n	6.0808	6.0476	8.5425		90.142		78.5358			rs
Ba2NdTaO6	Ba	Nd	Ta	O	s	f	d	1.61	0.983	0.64	0.8115	0.343	0.96242	1.02957	2	3	5	2	Ba2	Nd3	Ta5	0		0	10.0038	22.05	48.272	0.89	1.14	1.5	ss	air	1500			m	P21/n	?	?	?		?					rs
Ba2NdUO6	Ba	Nd	U	O	s	f	f	1.61	0.983	0.76	0.8715	0.223	0.936998	1.00237	2	3	5	2	Ba2	Nd3	U5	0			10.0038	22.05	46	0.89	1.14	1.38			1300			c		8.76						84.0277			rs
Ba2NdWO6	Ba	Nd	W	O	s	f	d	1.61	0.983	0.62	0.8015	0.363	0.966791	1.03424	2	3	5	2	Ba2	Nd3	W5	0		1	10.0038	22.05	51.6	0.89	1.14	2.36	ss		273			c	Fm-3m	8.4702						75.9611
Ba2NiMoO6	Ba	Ni	Mo	O	s	d	d	1.61	0.69	0.59	0.64	0.1	1.04333	1.11612	2	2	6	4	Ba2	Ni2	Mo6	0	8	0	10.0038	18.1688	68.827	0.89	1.91	2.16	nitrate decomp	air	1100			c		8.035						64.8437			rs
Ba2NiMoO6	Ba	Ni	Mo	O	s	d	d	1.61	0.69	0.59	0.64	0.1	1.04333	1.11612	2	2	6	4	Ba2	Ni2	Mo6	0	8	0	10.0038	18.1688	68.827	0.89	1.91	2.16	ss	air or Ar	1400			c		4.0225						65.0861			rs?		olive
Ba2NiMoO6	Ba	Ni	Mo	O	s	d	d	1.61	0.69	0.59	0.64	0.1	1.04333	1.11612	2	2	6	4	Ba2	Ni2	Mo6	0	8	0	10.0038	18.1688	68.827	0.89	1.91	2.16	sol-gel	air	1100			c	Fm-3m	8.04862						65.174			rs	0.99	yellowish green
Ba2NiNbO6	Ba	Ni	Nb	O	s	d	d	1.61	0.6	0.64	0.62	0.04	1.05366	1.12717	2	3	5	2	Ba2	Ni3	Nb5	0	7	0	10.0038	35.187	50.5728	0.89	1.91	1.6	ss	air/O2	1300			c		4.1						68.921			d	0
Ba2NiOsO6	Ba	Ni	Os	O	s	d	d	1.61	0.69	0.545	0.6175	0.145	1.05496	1.12857	2	2	6	4	Ba2	Ni2	Os6	0	8	2	10.0038	18.1688	70.1	0.89	1.91	2.2						h
Ba2NiReO6	Ba	Ni	Re	O	s	d	d	1.61	0.69	0.55	0.62	0.14	1.05366	1.12717	2	2	6	4	Ba2	Ni2	Re6	0	8	1	10.0038	18.1688	67	0.89	1.91	1.9	hydrothermal		700			c	Fm-3m	8.053						65.2804			rs	0.9	black
Ba2NiReO6	Ba	Ni	Re	O	s	d	d	1.61	0.69	0.55	0.62	0.14	1.05366	1.12717	2	2	6	4	Ba2	Ni2	Re6	0	8	1	10.0038	18.1688	67	0.89	1.91	1.9	ss	vacuum	273			c	Fm-3m	7.598						54.8287			rs
Ba2NiReO6	Ba	Ni	Re	O	s	d	d	1.61	0.69	0.55	0.62	0.14	1.05366	1.12717	2	2	6	4	Ba2	Ni2	Re6	0	8	1	10.0038	18.1688	67	0.89	1.91	1.9						c		8.04						64.9648			rs?
Ba2NiReO6	Ba	Ni	Re	O	s	d	d	1.61	0.69	0.55	0.62	0.14	1.05366	1.12717	2	2	6	4	Ba2	Ni2	Re6	0	8	1	10.0038	18.1688	67	0.89	1.91	1.9	ss	vacuum	1000			c		8.04						64.9648			rs		dirty green
Ba2NiTeO6	Ba	Ni	Te	O	s	d	p	1.61	0.69	0.56	0.625	0.13	1.05106	1.12439	2	2	6	4	Ba2	Ni2	Te6	0	8	10	10.0038	18.1688	69.1	0.89	1.91	2.1						h
Ba2NiUO6	Ba	Ni	U	O	s	d	f	1.61	0.69	0.73	0.71	0.04	1.00872	1.07909	2	2	6	4	Ba2	Ni2	U6	0	8		10.0038	18.1688	62	0.89	1.91	1.38	ss	air	1000			c	Fm-3m	8.3311						72.2798			rs
Ba2NiUO6	Ba	Ni	U	O	s	d	f	1.61	0.69	0.73	0.71	0.04	1.00872	1.07909	2	2	6	4	Ba2	Ni2	U6	0	8		10.0038	18.1688	62	0.89	1.91	1.38	ss		1100					8.334						72.3553			rs?		ocher
Ba2NiUO6	Ba	Ni	U	O	s	d	f	1.61	0.69	0.73	0.71	0.04	1.00872	1.07909	2	2	6	4	Ba2	Ni2	U6	0	8		10.0038	18.1688	62	0.89	1.91	1.38	flux	air	1050			c	Fm-3m	8.3346						72.371			rs	1	dark amber
Ba2NiUO6	Ba	Ni	U	O	s	d	f	1.61	0.69	0.73	0.71	0.04	1.00872	1.07909	2	2	6	4	Ba2	Ni2	U6	0	8		10.0038	18.1688	62	0.89	1.91	1.38	ss	air	1000			c	Fm-3m	8.336						72.4074			rs
Ba2NiUO6	Ba	Ni	U	O	s	d	f	1.61	0.69	0.73	0.71	0.04	1.00872	1.07909	2	2	6	4	Ba2	Ni2	U6	0	8		10.0038	18.1688	62	0.89	1.91	1.38	ss	air	1000			c		8.336						72.4074			rs
Ba2NiUO6	Ba	Ni	U	O	s	d	f	1.61	0.69	0.73	0.71	0.04	1.00872	1.07909	2	2	6	4	Ba2	Ni2	U6	0	8		10.0038	18.1688	62	0.89	1.91	1.38	ss	air	900			c	Fm-3m	8.336						72.4074			rs
Ba2NiUO6	Ba	Ni	U	O	s	d	f	1.61	0.69	0.73	0.71	0.04	1.00872	1.07909	2	2	6	4	Ba2	Ni2	U6	0	8		10.0038	18.1688	62	0.89	1.91	1.38	ss	air				c	Fm-3m	8.336						72.4074			rs
Ba2NiWO6	Ba	Ni	W	O	s	d	d	1.61	0.69	0.6	0.645	0.09	1.04078	1.11339	2	2	6	4	Ba2	Ni2	W6	0	8	0	10.0038	18.1688	64.77	0.89	1.91	2.36	ss	air	1400			c		3.43						40.3536			rs		light green
Ba2NiWO6	Ba	Ni	W	O	s	d	d	1.61	0.69	0.6	0.645	0.09	1.04078	1.11339	2	2	6	4	Ba2	Ni2	W6	0	8	0	10.0038	18.1688	64.77	0.89	1.91	2.36	ss	air	1300			c	Fm-3m	8.06						65.4508			rs	1
Ba2NiWO6	Ba	Ni	W	O	s	d	d	1.61	0.69	0.6	0.645	0.09	1.04078	1.11339	2	2	6	4	Ba2	Ni2	W6	0	8	0	10.0038	18.1688	64.77	0.89	1.91	2.36	ss	air or Ar	1400			c		4.0326						65.5776			rs?		light green
Ba2NiWO6	Ba	Ni	W	O	s	d	d	1.61	0.69	0.6	0.645	0.09	1.04078	1.11339	2	2	6	4	Ba2	Ni2	W6	0	8	0	10.0038	18.1688	64.77	0.89	1.91	2.36	ss	air	1250			c		8.066						65.5971			rs
Ba2NiWO6	Ba	Ni	W	O	s	d	d	1.61	0.69	0.6	0.645	0.09	1.04078	1.11339	2	2	6	4	Ba2	Ni2	W6	0	8	0	10.0038	18.1688	64.77	0.89	1.91	2.36	ss	air	1150			c	Fm-3m	8.0703						65.7021			rs		pale green
Ba2NiWO6	Ba	Ni	W	O	s	d	d	1.61	0.69	0.6	0.645	0.09	1.04078	1.11339	2	2	6	4	Ba2	Ni2	W6	0	8	0	10.0038	18.1688	64.77	0.89	1.91	2.36	floating-zone	air															rs?
Ba2PbBiO6	Ba	Pb	Bi	O	s	p	p	1.61	0.775		0.775	0.775	0.978571	1.04684	2	4	4	0	Ba2	Pb4	Bi4	0	10	10	10.0038	42.3326	45.37	0.89	2.33	2.02	ss	air	800			o	Ibmm	6.1181	6.0892	8.5976				80.0745			d	0
Ba2PbMoO6	Ba	Pb	Mo	O	s	p	d	1.61	0.9825	0.61	0.79625	0.3725	0.969103	1.03671	2	3	5	2	Ba2	Pb3	Mo5	0	10	1	10.0038	31.9373	54.4167	0.89	2.33	2.16	ss		850					4.26						77.3088
Ba2PbPuO6	Ba	Pb	Pu	O	s	p	f	1.61	1.19	0.71	0.95	0.48	0.905698	0.968887	2	2	6	4	Ba2	Pb2	Pu6	0	10		10.0038	15.0325	80	0.89	2.33	1.28	ss		950			c		8.58						78.9536			rs?
Ba2PbUO6	Ba	Pb	U	O	s	p	f	1.61	1.19	0.73	0.96	0.46	0.901861	0.964781	2	2	6	4	Ba2	Pb2	U6	0	10		10.0038	15.0325	62	0.89	2.33	1.38	ss	air	900			c	Fm-3m	8.833						86.1459			rs
Ba2PbUO6	Ba	Pb	U	O	s	p	f	1.61	1.19	0.73	0.96	0.46	0.901861	0.964781	2	2	6	4	Ba2	Pb2	U6	0	10		10.0038	15.0325	62	0.89	2.33	1.38	ss	air	900			c	Fm-3m	8.838						86.2923			rs
Ba2PbUO6	Ba	Pb	U	O	s	p	f	1.61	1.19	0.73	0.96	0.46	0.901861	0.964781	2	2	6	4	Ba2	Pb2	U6	0	10		10.0038	15.0325	62	0.89	2.33	1.38			1300			c		8.85						86.6443			rs
Ba2PrBiO6	Ba	Pr	Bi	O	s	f	p	1.61	0.99	0.76	0.875	0.23	0.935557	1.00083	2	3	5	2	Ba2	Pr3	Bi5	0		10	10.0038	21.6237	54.856	0.89	1.13	2.02	ss	air	800			c		4.338						81.6335
Ba2PrBiO6	Ba	Pr	Bi	O	s	f	p	1.61	0.99	0.76	0.875	0.23	0.935557	1.00083	2	3	5	2	Ba2	Pr3	Bi5	0		10	10.0038	21.6237	54.856	0.89	1.13	2.02	ss	air	850			c	Fm-3m	8.719						82.8533			rs
Ba2PrBiO6	Ba	Pr	Bi	O	s	f	p	1.61	0.99	0.76	0.875	0.23	0.935557	1.00083	2	3	5	2	Ba2	Pr3	Bi5	0		10	10.0038	21.6237	54.856	0.89	1.13	2.02	ss	air	1000			m	I2/m	6.2011	6.1583	8.6968		89.922		83.0288		162.967	rs	0.75	black
Ba2PrBiO6	Ba	Pr	Bi	O	s	f	p	1.61	0.99	0.76	0.875	0.23	0.935557	1.00083	2	3	5	2	Ba2	Pr3	Bi5	0		10	10.0038	21.6237	54.856	0.89	1.13	2.02	sol-gel	air	273														rs	<1
Ba2PrIrO6	Ba	Pr	Ir	O	s	f	d	1.61	0.85	0.625	0.7375	0.225	0.995739	1.06521	2	4	4	0	Ba2	Pr4	Ir4	0		5	10.0038	38.981	40	0.89	1.13	2.2	ss	air	1200			o		5.941	5.927	8.393				73.8842			d	0
Ba2PrIrO6	Ba	Pr	Ir	O	s	f	d	1.61	0.85	0.625	0.7375	0.225	0.995739	1.06521	2	4	4	0	Ba2	Pr4	Ir4	0		5	10.0038	38.981	40	0.89	1.13	2.2	ss	air	1200			te	P4/mnc	5.9395		8.4007				74.0893	1.00012		rs
Ba2PrIrO6	Ba	Pr	Ir	O	s	f	d	1.61	0.85	0.625	0.7375	0.225	0.995739	1.06521	2	4	4	0	Ba2	Pr4	Ir4	0		5	10.0038	38.981	40	0.89	1.13	2.2	ss	air	1200			m	P21/n	5.9443	5.9379	8.3984		89.979		74.1089			rs	1
Ba2PrIrO6	Ba	Pr	Ir	O	s	f	d	1.61	0.85	0.625	0.7375	0.225	0.995739	1.06521	2	4	4	0	Ba2	Pr4	Ir4	0		5	10.0038	38.981	40	0.89	1.13	2.2	ss	air	1200			m	P21/n	5.9443	5.9379	8.3984		89.98		74.1089			rs
Ba2PrIrO6	Ba	Pr	Ir	O	s	f	d	1.61	0.85	0.625	0.7375	0.225	0.995739	1.06521	2	4	4	0	Ba2	Pr4	Ir4	0		5	10.0038	38.981	40	0.89	1.13	2.2	ss	air	1250			c	Fm-3m	8.40135						74.1237			rs
Ba2PrIrO6	Ba	Pr	Ir	O	s	f	d	1.61	0.85	0.625	0.7375	0.225	0.995739	1.06521	2	4	4	0	Ba2	Pr4	Ir4	0		5	10.0038	38.981	40	0.89	1.13	2.2	ss					c	Fm-3m	8.40235						74.1502			rs	0.99
Ba2PrMoO6	Ba	Pr	Mo	O	s	f	d	1.61	0.99	0.61	0.8	0.38	0.967451	1.03495	2	3	5	2	Ba2	Pr3	Mo5	0		1	10.0038	21.6237	54.4167	0.89	1.13	2.16	ss	H2/N2	1400			te		8.495		8.597				77.5503	1.01201				black
Ba2PrNbO6	Ba	Pr	Nb	O	s	f	d	1.61	0.99	0.64	0.815	0.35	0.960899	1.02794	2	3	5	2	Ba2	Pr3	Nb5	0		0	10.0038	21.6237	50.5728	0.89	1.13	1.6	ss	air	1400			~c		4.27						77.8545			d
Ba2PrNbO6	Ba	Pr	Nb	O	s	f	d	1.61	0.99	0.64	0.815	0.35	0.960899	1.02794	2	3	5	2	Ba2	Pr3	Nb5	0		0	10.0038	21.6237	50.5728	0.89	1.13	1.6	ss	air	1400			r		6.05			60.17			78.5941			rs
Ba2PrNbO6	Ba	Pr	Nb	O	s	f	d	1.61	0.99	0.64	0.815	0.35	0.960899	1.02794	2	3	5	2	Ba2	Pr3	Nb5	0		0	10.0038	21.6237	50.5728	0.89	1.13	1.6						c		4.285						78.6778			d	0
Ba2PrNbO6	Ba	Pr	Nb	O	s	f	d	1.61	0.99	0.64	0.815	0.35	0.960899	1.02794	2	3	5	2	Ba2	Pr3	Nb5	0		0	10.0038	21.6237	50.5728	0.89	1.13	1.6	ss	air	1400			m	P21/n	6.0913	6.0539	8.5509		90.161		78.8307			rs
Ba2PrNbO6	Ba	Pr	Nb	O	s	f	d	1.61	0.99	0.64	0.815	0.35	0.960899	1.02794	2	3	5	2	Ba2	Pr3	Nb5	0		0	10.0038	21.6237	50.5728	0.89	1.13	1.6	ss	air	1500					?	?	?	?	?	?				rs
Ba2PrNbO6	Ba	Pr	Nb	O	s	f	d	1.61	0.99	0.64	0.815	0.35	0.960899	1.02794	2	3	5	2	Ba2	Pr3	Nb5	0		0	10.0038	21.6237	50.5728	0.89	1.13	1.6	ss	air	1350														rs
Ba2PrOsO6	Ba	Pr	Os	O	s	f	d	1.61	0.99	0.575	0.7825	0.415	0.975208	1.04325	2	3	5	2	Ba2	Pr3	Os5	0		3	10.0038	21.6237	55	0.89	1.13	2.2	ss	air	1450			c		8.5						76.7656					black
Ba2PrOsO6	Ba	Pr	Os	O	s	f	d	1.61	0.99	0.575	0.7825	0.415	0.975208	1.04325	2	3	5	2	Ba2	Pr3	Os5	0		3	10.0038	21.6237	55	0.89	1.13	2.2	ss	vacuum	900			c	Fm-3m	8.5097						77.0287
Ba2PrPtO6	Ba	Pr	Pt	O	s	f	d	1.61	0.85	0.625	0.7375	0.225	0.995739	1.06521	2	4	4	0	Ba2	Pr4	Pt4	0		6	10.0038	38.981	43	0.89	1.13	2.28	ss		273			c	Fm-3m	8.3892						73.8026			rs
Ba2PrRuO6	Ba	Pr	Ru	O	s	f	d	1.61	0.99	0.565	0.7775	0.425	0.977447	1.04564	2	3	5	2	Ba2	Pr3	Ru5	0		3	10.0038	21.6237	59	0.89	1.13	2.2	flux		1180			m		5.999	5.982	8.469		89.98		75.9797			rs
Ba2PrRuO6	Ba	Pr	Ru	O	s	f	d	1.61	0.99	0.565	0.7775	0.425	0.977447	1.04564	2	3	5	2	Ba2	Pr3	Ru5	0		3	10.0038	21.6237	59	0.89	1.13	2.2	ss	air	1200			c		4.2388						76.1603			d	0
Ba2PrRuO6	Ba	Pr	Ru	O	s	f	d	1.61	0.99	0.565	0.7775	0.425	0.977447	1.04564	2	3	5	2	Ba2	Pr3	Ru5	0		3	10.0038	21.6237	59	0.89	1.13	2.2	ss	air	1350			c	Fm-3m	8.48415						76.337			rs
Ba2PrRuO6	Ba	Pr	Ru	O	s	f	d	1.61	0.99	0.565	0.7775	0.425	0.977447	1.04564	2	3	5	2	Ba2	Pr3	Ru5	0		3	10.0038	21.6237	59	0.89	1.13	2.2	ss	air	1200			m	P21/n	6.0049	5.9912	8.4914		90.02		76.3728			rs
Ba2PrRuO6	Ba	Pr	Ru	O	s	f	d	1.61	0.99	0.565	0.7775	0.425	0.977447	1.04564	2	3	5	2	Ba2	Pr3	Ru5	0		3	10.0038	21.6237	59	0.89	1.13	2.2	ss	air	1200			m	P21/n	6.0069	5.993	8.4912		90.04		76.4194			rs	1
Ba2PrRuO6	Ba	Pr	Ru	O	s	f	d	1.61	0.99	0.565	0.7775	0.425	0.977447	1.04564	2	3	5	2	Ba2	Pr3	Ru5	0		3	10.0038	21.6237	59	0.89	1.13	2.2	ss	air	1200			m	P21/n	6.0077	5.9929	8.4915		89.99		76.431			rs
Ba2PrRuO6	Ba	Pr	Ru	O	s	f	d	1.61	0.99	0.565	0.7775	0.425	0.977447	1.04564	2	3	5	2	Ba2	Pr3	Ru5	0		3	10.0038	21.6237	59	0.89	1.13	2.2	ss	air	1300			m	P21/n	?	?	?		?					rs
Ba2PrRuO6	Ba	Pr	Ru	O	s	f	d	1.61	0.99	0.565	0.7775	0.425	0.977447	1.04564	2	3	5	2	Ba2	Pr3	Ru5	0		3	10.0038	21.6237	59	0.89	1.13	2.2	ss	O2	1300
Ba2PrSbO6	Ba	Pr	Sb	O	s	f	p	1.61	0.99	0.6	0.795	0.39	0.969654	1.0373	2	3	5	2	Ba2	Pr3	Sb5	0		10	10.0038	21.6237	55	0.89	1.13	2.05	ss	air	1500			c		8.572						78.7329			rs
Ba2PrSbO6	Ba	Pr	Sb	O	s	f	p	1.61	0.99	0.6	0.795	0.39	0.969654	1.0373	2	3	5	2	Ba2	Pr3	Sb5	0		10	10.0038	21.6237	55	0.89	1.13	2.05			1400			c		4.275						78.1283
Ba2PrSbO6	Ba	Pr	Sb	O	s	f	p	1.61	0.99	0.6	0.795	0.39	0.969654	1.0373	2	3	5	2	Ba2	Pr3	Sb5	0		10	10.0038	21.6237	55	0.89	1.13	2.05	ss	air				m		6.05	6.06	8.57		90.15		78.5502					yellow
Ba2PrSbO6	Ba	Pr	Sb	O	s	f	p	1.61	0.99	0.6	0.795	0.39	0.969654	1.0373	2	3	5	2	Ba2	Pr3	Sb5	0		10	10.0038	21.6237	55	0.89	1.13	2.05	ss	air	1400			r	R-3	6.0527			60.1484			78.6611			rs
Ba2PrSbO6	Ba	Pr	Sb	O	s	f	p	1.61	0.99	0.6	0.795	0.39	0.969654	1.0373	2	3	5	2	Ba2	Pr3	Sb5	0		10	10.0038	21.6237	55	0.89	1.13	2.05	ss	air	1350			r	R-3	6.0529			60.147			78.6664			rs
Ba2PrSbO6	Ba	Pr	Sb	O	s	f	p	1.61	0.99	0.6	0.795	0.39	0.969654	1.0373	2	3	5	2	Ba2	Pr3	Sb5	0		10	10.0038	21.6237	55	0.89	1.13	2.05	ss	air	1450			r	R-3	6.0529			60.147			78.6664			rs	1
Ba2PrSbO6	Ba	Pr	Sb	O	s	f	p	1.61	0.99	0.6	0.795	0.39	0.969654	1.0373	2	3	5	2	Ba2	Pr3	Sb5	0		10	10.0038	21.6237	55	0.89	1.13	2.05	ss	air	1300			r	R-3	6.0549			60.124			78.7035			rs
Ba2PrSnO6	Ba	Pr	Sn	O	s	f	p	1.61	0.85	0.69	0.77	0.16	0.980826	1.04926	2	4	4	0	Ba2	Pr4	Sn4	0		10	10.0038	38.981	40.735	0.89	1.13	1.96	ss	air	1450			r	R-3c	6.0099			60.056			76.8436			d	0
Ba2PrTaO6	Ba	Pr	Ta	O	s	f	d	1.61	0.99	0.64	0.815	0.35	0.960899	1.02794	2	3	5	2	Ba2	Pr3	Ta5	0		0	10.0038	21.6237	48.272	0.89	1.13	1.5	ss	air	1400			~c		4.27						77.8545			d
Ba2PrTaO6	Ba	Pr	Ta	O	s	f	d	1.61	0.99	0.64	0.815	0.35	0.960899	1.02794	2	3	5	2	Ba2	Pr3	Ta5	0		0	10.0038	21.6237	48.272	0.89	1.13	1.5	ss	air	1400			r		6.05			60.17			78.5941			rs
Ba2PrTaO6	Ba	Pr	Ta	O	s	f	d	1.61	0.99	0.64	0.815	0.35	0.960899	1.02794	2	3	5	2	Ba2	Pr3	Ta5	0		0	10.0038	21.6237	48.272	0.89	1.13	1.5	ss	air	1300			m	P21/n	6.0919	6.0561	8.5545		90.157		78.9003			rs
Ba2PrTaO6	Ba	Pr	Ta	O	s	f	d	1.61	0.99	0.64	0.815	0.35	0.960899	1.02794	2	3	5	2	Ba2	Pr3	Ta5	0		0	10.0038	21.6237	48.272	0.89	1.13	1.5	ss	air	1400			m	I2/m	6.09518	6.05862	8.5571		90.1705		78.9996			rs
Ba2PrTaO6	Ba	Pr	Ta	O	s	f	d	1.61	0.99	0.64	0.815	0.35	0.960899	1.02794	2	3	5	2	Ba2	Pr3	Ta5	0		0	10.0038	21.6237	48.272	0.89	1.13	1.5	ss	air	1500			m	P21/n	?	?	?		?					rs
Ba2PrWO6	Ba	Pr	W	O	s	f	d	1.61	0.99	0.62	0.805	0.37	0.965257	1.0326	2	3	5	2	Ba2	Pr3	W5	0		1	10.0038	21.6237	51.6	0.89	1.13	2.36	ss		273			c	Fm-3m	8.5023						76.828
Ba2RhNbO6	Ba	Rh	Nb	O	s	d	d	1.61	0.665	0.64	0.6525	0.025	1.03698	1.10932	2	3	5	2	Ba2	Rh3	Nb5	0	6	0	10.0038	31.06	50.5728	0.89	2.28	1.6	ss	air/O2	1300			c		8.17						68.1673			rs
Ba2RhRuO6	Ba	Rh	Ru	O	s	d	d	1.61	0.665	0.565	0.615	0.1	1.05627	1.12997	2	3	5	2	Ba2	Rh3	Ru5	0	6	3	10.0038	31.06	59	0.89	2.28	2.2						h
Ba2RhSbO6	Ba	Rh	Sb	O	s	d	p	1.61	0.665	0.6	0.6325	0.065	1.04718	1.12024	2	3	5	2	Ba2	Rh3	Sb5	0	6	10	10.0038	31.06	55	0.89	2.28	2.05						h
Ba2RhUO6	Ba	Rh	U	O	s	d	f	1.61	0.6	0.89	0.745	0.29	0.992257	1.06148	2	4	4	0	Ba2	Rh4	U4	0	5		10.0038	42	36.7	0.89	2.28	1.38	ss	vacuum	1000			h
Ba2ScBiO6	Ba	Sc	Bi	O	s	d	p	1.61	0.745	0.76	0.7525	0.015	0.9888	1.05779	2	3	5	2	Ba2	Sc3	Bi5	0	0	10	10.0038	24.7568	54.856	0.89	1.36	2.02	ss		1000			c	Fm-3m	8.366						73.192			rs	0.75
Ba2ScBiO6	Ba	Sc	Bi	O	s	d	p	1.61	0.745	0.76	0.7525	0.015	0.9888	1.05779	2	3	5	2	Ba2	Sc3	Bi5	0	0	10	10.0038	24.7568	54.856	0.89	1.36	2.02	ss	air	800			c		4.193						73.7182
Ba2ScIrO6	Ba	Sc	Ir	O	s	d	d	1.61	0.745	0.57	0.6575	0.175	1.03446	1.10663	2	3	5	2	Ba2	Sc3	Ir5	0	0	4	10.0038	24.7568	57	0.89	1.36	2.2	ss	air	1400			m	P21/n	5.7666	5.7593	8.1427		89.947		67.608		173.733	rs	0.946	black
Ba2ScMoO6	Ba	Sc	Mo	O	s	d	d	1.61	0.745	0.61	0.6775	0.135	1.0245	1.09597	2	3	5	2	Ba2	Sc3	Mo5	0	0	1	10.0038	24.7568	54.4167	0.89	1.36	2.16						h													black
Ba2ScNbO6	Ba	Sc	Nb	O	s	d	d	1.61	0.745	0.64	0.6925	0.105	1.01715	1.08812	2	3	5	2	Ba2	Sc3	Nb5	0	0	0	10.0038	24.7568	50.5728	0.89	1.36	1.6	nitrate	air				c		8.21						69.1735					light blue
Ba2ScNbO6	Ba	Sc	Nb	O	s	d	d	1.61	0.745	0.64	0.6925	0.105	1.01715	1.08812	2	3	5	2	Ba2	Sc3	Nb5	0	0	0	10.0038	24.7568	50.5728	0.89	1.36	1.6	ss	air	1400			c		8.22						69.4265			rs
Ba2ScNbO6	Ba	Sc	Nb	O	s	d	d	1.61	0.745	0.64	0.6925	0.105	1.01715	1.08812	2	3	5	2	Ba2	Sc3	Nb5	0	0	0	10.0038	24.7568	50.5728	0.89	1.36	1.6						c	Fm-3m	8.23402						69.7824			rs	0.53
Ba2ScNbO6	Ba	Sc	Nb	O	s	d	d	1.61	0.745	0.64	0.6925	0.105	1.01715	1.08812	2	3	5	2	Ba2	Sc3	Nb5	0	0	0	10.0038	24.7568	50.5728	0.89	1.36	1.6	ss	air	1250			c	Fm-3m	8.23402						69.7824			rs	0.53
Ba2ScNbO6	Ba	Sc	Nb	O	s	d	d	1.61	0.745	0.64	0.6925	0.105	1.01715	1.08812	2	3	5	2	Ba2	Sc3	Nb5	0	0	0	10.0038	24.7568	50.5728	0.89	1.36	1.6						c		4.121						69.9855			d	0
Ba2ScNbO6	Ba	Sc	Nb	O	s	d	d	1.61	0.745	0.64	0.6925	0.105	1.01715	1.08812	2	3	5	2	Ba2	Sc3	Nb5	0	0	0	10.0038	24.7568	50.5728	0.89	1.36	1.6	ss		1250
Ba2ScOsO6	Ba	Sc	Os	O	s	d	d	1.61	0.745	0.575	0.66	0.17	1.0332	1.10528	2	3	5	2	Ba2	Sc3	Os5	0	0	3	10.0038	24.7568	55	0.89	1.36	2.2						c		8.152						67.7178			rs
Ba2ScReO6	Ba	Sc	Re	O	s	d	d	1.61	0.745	0.58	0.6625	0.165	1.03195	1.10394	2	3	5	2	Ba2	Sc3	Re5	0	0	2	10.0038	24.7568	51.9	0.89	1.36	1.9	ss	ampoule	1000			c	Fm-3m	8.163						67.9922			rs
Ba2ScReO6	Ba	Sc	Re	O	s	d	d	1.61	0.745	0.58	0.6625	0.165	1.03195	1.10394	2	3	5	2	Ba2	Sc3	Re5	0	0	2	10.0038	24.7568	51.9	0.89	1.36	1.9						c		8.163						67.9922			rs
Ba2ScSbO6	Ba	Sc	Sb	O	s	d	p	1.61	0.745	0.6	0.6725	0.145	1.02697	1.09862	2	3	5	2	Ba2	Sc3	Sb5	0	0	10	10.0038	24.7568	55	0.89	1.36	2.05	ss	air	1400			c		8.172						68.2174			rs		white
Ba2ScSbO6	Ba	Sc	Sb	O	s	d	p	1.61	0.745	0.6	0.6725	0.145	1.02697	1.09862	2	3	5	2	Ba2	Sc3	Sb5	0	0	10	10.0038	24.7568	55	0.89	1.36	2.05			1400			c		4.096						68.7195
Ba2ScSbO6	Ba	Sc	Sb	O	s	d	p	1.61	0.745	0.6	0.6725	0.145	1.02697	1.09862	2	3	5	2	Ba2	Sc3	Sb5	0	0	10	10.0038	24.7568	55	0.89	1.36	2.05	ss	air	1100			c		8.197						68.8454					white
Ba2ScSbO6	Ba	Sc	Sb	O	s	d	p	1.61	0.745	0.6	0.6725	0.145	1.02697	1.09862	2	3	5	2	Ba2	Sc3	Sb5	0	0	10	10.0038	24.7568	55	0.89	1.36	2.05	ss	air				c		8.2						68.921					white
Ba2ScTaO6	Ba	Sc	Ta	O	s	d	d	1.61	0.745	0.64	0.6925	0.105	1.01715	1.08812	2	3	5	2	Ba2	Sc3	Ta5	0	0	0	10.0038	24.7568	48.272	0.89	1.36	1.5						c	Fm-3m	8.22						69.4265			rs	0.91
Ba2ScTaO6	Ba	Sc	Ta	O	s	d	d	1.61	0.745	0.64	0.6925	0.105	1.01715	1.08812	2	3	5	2	Ba2	Sc3	Ta5	0	0	0	10.0038	24.7568	48.272	0.89	1.36	1.5	ss	air	1400			c		8.228						69.6294			rs
Ba2ScTaO6	Ba	Sc	Ta	O	s	d	d	1.61	0.745	0.64	0.6925	0.105	1.01715	1.08812	2	3	5	2	Ba2	Sc3	Ta5	0	0	0	10.0038	24.7568	48.272	0.89	1.36	1.5	nitrate	air				c		8.23						69.6802					white
Ba2ScTaO6	Ba	Sc	Ta	O	s	d	d	1.61	0.745	0.64	0.6925	0.105	1.01715	1.08812	2	3	5	2	Ba2	Sc3	Ta5	0	0	0	10.0038	24.7568	48.272	0.89	1.36	1.5						c	Fm-3m	8.23147						69.7176			rs	0.51
Ba2ScTaO6	Ba	Sc	Ta	O	s	d	d	1.61	0.745	0.64	0.6925	0.105	1.01715	1.08812	2	3	5	2	Ba2	Sc3	Ta5	0	0	0	10.0038	24.7568	48.272	0.89	1.36	1.5	ss	air	1250			c	Fm-3m	8.23147						69.7176			rs	0.51
Ba2ScUO6	Ba	Sc	U	O	s	d	f	1.61	0.745	0.76	0.7525	0.015	0.9888	1.05779	2	3	5	2	Ba2	Sc3	U5	0	0		10.0038	24.7568	46	0.89	1.36	1.38	ss	vacuum	1000			c	Fm-3m	8.49						76.495			rs
Ba2ScUO6	Ba	Sc	U	O	s	d	f	1.61	0.745	0.76	0.7525	0.015	0.9888	1.05779	2	3	5	2	Ba2	Sc3	U5	0	0		10.0038	24.7568	46	0.89	1.36	1.38	ss	Ar	1300			c		8.497						76.6844
Ba2SmBiO6	Ba	Sm	Bi	O	s	f	p	1.61	0.958	0.76	0.859	0.198	0.942183	1.00792	2	3	5	2	Ba2	Sm3	Bi5	0		10	10.0038	23.56	54.856	0.89	1.17	2.02	ss	air	800			c		4.318						80.5096
Ba2SmBiO6	Ba	Sm	Bi	O	s	f	p	1.61	0.958	0.76	0.859	0.198	0.942183	1.00792	2	3	5	2	Ba2	Sm3	Bi5	0		10	10.0038	23.56	54.856	0.89	1.17	2.02	ss	air	850			c	Fm-3m	8.649						80.8738			rs
Ba2SmBiO6	Ba	Sm	Bi	O	s	f	p	1.61	0.958	0.76	0.859	0.198	0.942183	1.00792	2	3	5	2	Ba2	Sm3	Bi5	0		10	10.0038	23.56	54.856	0.89	1.17	2.02	ss	air	1000			m													brown
Ba2SmBiO6	Ba	Sm	Bi	O	s	f	p	1.61	0.958	0.76	0.859	0.198	0.942183	1.00792	2	3	5	2	Ba2	Sm3	Bi5	0		10	10.0038	23.56	54.856	0.89	1.17	2.02	ss	air	850														rs
Ba2SmIrO6	Ba	Sm	Ir	O	s	f	d	1.61	0.958	0.57	0.764	0.388	0.983545	1.05216	2	3	5	2	Ba2	Sm3	Ir5	0		4	10.0038	23.56	57	0.89	1.17	2.2	ss	air	1100			c		8.44						75.1514			rs?		black
Ba2SmIrO6	Ba	Sm	Ir	O	s	f	d	1.61	0.958	0.57	0.764	0.388	0.983545	1.05216	2	3	5	2	Ba2	Sm3	Ir5	0		4	10.0038	23.56	57	0.89	1.17	2.2	ss	air	1200			m	P21/n	5.9731	5.9718	8.4468		90.03		75.3247			rs	1
Ba2SmIrO6	Ba	Sm	Ir	O	s	f	d	1.61	0.958	0.57	0.764	0.388	0.983545	1.05216	2	3	5	2	Ba2	Sm3	Ir5	0		4	10.0038	23.56	57	0.89	1.17	2.2	ss	air	1200			m	P21/n										rs	1	black
Ba2SmMoO6	Ba	Sm	Mo	O	s	f	d	1.61	0.958	0.61	0.784	0.348	0.974538	1.04253	2	3	5	2	Ba2	Sm3	Mo5	0		1	10.0038	23.56	54.4167	0.89	1.17	2.16	ss	H2/N2	1100			c	Fm-3m	8.4762						76.1226			rs
Ba2SmMoO6	Ba	Sm	Mo	O	s	f	d	1.61	0.958	0.61	0.784	0.348	0.974538	1.04253	2	3	5	2	Ba2	Sm3	Mo5	0		1	10.0038	23.56	54.4167	0.89	1.17	2.16	ss	H2/N2	1300			te	I4/mmm	5.98954		8.5003				76.2362	1.00352		rs	1
Ba2SmMoO6	Ba	Sm	Mo	O	s	f	d	1.61	0.958	0.61	0.784	0.348	0.974538	1.04253	2	3	5	2	Ba2	Sm3	Mo5	0		1	10.0038	23.56	54.4167	0.89	1.17	2.16	ss	H2/N2	1400			te		8.472		8.5				76.2607	1.00331				black
Ba2SmMoO6	Ba	Sm	Mo	O	s	f	d	1.61	0.958	0.61	0.784	0.348	0.974538	1.04253	2	3	5	2	Ba2	Sm3	Mo5	0		1	10.0038	23.56	54.4167	0.89	1.17	2.16	ss	H2/N2	1200			tr	I-1										rs	1
Ba2SmNbO6	Ba	Sm	Nb	O	s	f	d	1.61	0.958	0.64	0.799	0.318	0.967891	1.03542	2	3	5	2	Ba2	Sm3	Nb5	0		0	10.0038	23.56	50.5728	0.89	1.17	1.6	ss	air	1400			~c		4.24						76.225			d
Ba2SmNbO6	Ba	Sm	Nb	O	s	f	d	1.61	0.958	0.64	0.799	0.318	0.967891	1.03542	2	3	5	2	Ba2	Sm3	Nb5	0		0	10.0038	23.56	50.5728	0.89	1.17	1.6						c		4.248						76.6573			d	0
Ba2SmNbO6	Ba	Sm	Nb	O	s	f	d	1.61	0.958	0.64	0.799	0.318	0.967891	1.03542	2	3	5	2	Ba2	Sm3	Nb5	0		0	10.0038	23.56	50.5728	0.89	1.17	1.6	ss	air	1400			r		6.01			60.07			76.8718			rs
Ba2SmNbO6	Ba	Sm	Nb	O	s	f	d	1.61	0.958	0.64	0.799	0.318	0.967891	1.03542	2	3	5	2	Ba2	Sm3	Nb5	0		0	10.0038	23.56	50.5728	0.89	1.17	1.6	ss	air	1400			m	P21/n	6.0187	6.0156	8.5355		90.2		77.2588			rs
Ba2SmNbO6	Ba	Sm	Nb	O	s	f	d	1.61	0.958	0.64	0.799	0.318	0.967891	1.03542	2	3	5	2	Ba2	Sm3	Nb5	0		0	10.0038	23.56	50.5728	0.89	1.17	1.6	ss	air	1500					?	?	?	?	?	?				rs
Ba2SmNbO6	Ba	Sm	Nb	O	s	f	d	1.61	0.958	0.64	0.799	0.318	0.967891	1.03542	2	3	5	2	Ba2	Sm3	Nb5	0		0	10.0038	23.56	50.5728	0.89	1.17	1.6	ss	air	1350														rs
Ba2SmOsO6	Ba	Sm	Os	O	s	f	d	1.61	0.958	0.575	0.7665	0.383	0.98241	1.05095	2	3	5	2	Ba2	Sm3	Os5	0		3	10.0038	23.56	55	0.89	1.17	2.2	ss	air	1300			c		8.45						75.4189					black
Ba2SmOsO6	Ba	Sm	Os	O	s	f	d	1.61	0.958	0.575	0.7665	0.383	0.98241	1.05095	2	3	5	2	Ba2	Sm3	Os5	0		3	10.0038	23.56	55	0.89	1.17	2.2	ss	vacuum	900			c	Fm-3m	8.4505						75.4323
Ba2SmReO6	Ba	Sm	Re	O	s	f	d	1.61	0.958	0.58	0.769	0.378	0.981278	1.04974	2	3	5	2	Ba2	Sm3	Re5	0		2	10.0038	23.56	51.9	0.89	1.17	1.9	ss	ampoule	1000			c	Fm-3m	8.458						75.6333			rs
Ba2SmReO6	Ba	Sm	Re	O	s	f	d	1.61	0.958	0.58	0.769	0.378	0.981278	1.04974	2	3	5	2	Ba2	Sm3	Re5	0		2	10.0038	23.56	51.9	0.89	1.17	1.9	ss	vacuum	1100			m	P21/n	5.9847	5.9868	8.4685		90.043		75.8549			rs?
Ba2SmRuO6	Ba	Sm	Ru	O	s	f	d	1.61	0.958	0.565	0.7615	0.393	0.984683	1.05338	2	3	5	2	Ba2	Sm3	Ru5	0		3	10.0038	23.56	59	0.89	1.17	2.2	ss	air	1140			c	Fm-3m	8.4259						74.7754			rs
Ba2SmRuO6	Ba	Sm	Ru	O	s	f	d	1.61	0.958	0.565	0.7615	0.393	0.984683	1.05338	2	3	5	2	Ba2	Sm3	Ru5	0		3	10.0038	23.56	59	0.89	1.17	2.2	ss	air	1200			c		4.215						74.8846			d	0
Ba2SmSbO6	Ba	Sm	Sb	O	s	f	p	1.61	0.958	0.6	0.779	0.358	0.976774	1.04492	2	3	5	2	Ba2	Sm3	Sb5	0		10	10.0038	23.56	55	0.89	1.17	2.05	ss	air	1550			c		8.52						77.3088			rs
Ba2SmSbO6	Ba	Sm	Sb	O	s	f	p	1.61	0.958	0.6	0.779	0.358	0.976774	1.04492	2	3	5	2	Ba2	Sm3	Sb5	0		10	10.0038	23.56	55	0.89	1.17	2.05	ss	air				c		4.25						76.7656					white
Ba2SmSbO6	Ba	Sm	Sb	O	s	f	p	1.61	0.958	0.6	0.779	0.358	0.976774	1.04492	2	3	5	2	Ba2	Sm3	Sb5	0		10	10.0038	23.56	55	0.89	1.17	2.05	ss	air	273			c	Fm-3m	8.503						76.8469			rs?		white-yellowish white-pale orange yellow
Ba2SmSbO6	Ba	Sm	Sb	O	s	f	p	1.61	0.958	0.6	0.779	0.358	0.976774	1.04492	2	3	5	2	Ba2	Sm3	Sb5	0		10	10.0038	23.56	55	0.89	1.17	2.05			1400			c		4.253						76.9283
Ba2SmSbO6	Ba	Sm	Sb	O	s	f	p	1.61	0.958	0.6	0.779	0.358	0.976774	1.04492	2	3	5	2	Ba2	Sm3	Sb5	0		10	10.0038	23.56	55	0.89	1.17	2.05	ss	air	1300			c	Fm-3m	8.50908						77.0119			rs
Ba2SmTaO6	Ba	Sm	Ta	O	s	f	d	1.61	0.958	0.64	0.799	0.318	0.967891	1.03542	2	3	5	2	Ba2	Sm3	Ta5	0		0	10.0038	23.56	48.272	0.89	1.17	1.5	ss	air	1400			~c		4.24						76.225			d
Ba2SmTaO6	Ba	Sm	Ta	O	s	f	d	1.61	0.958	0.64	0.799	0.318	0.967891	1.03542	2	3	5	2	Ba2	Sm3	Ta5	0		0	10.0038	23.56	48.272	0.89	1.17	1.5	ss	air	1400			r		6.01			60.07			76.8718			rs
Ba2SmTaO6	Ba	Sm	Ta	O	s	f	d	1.61	0.958	0.64	0.799	0.318	0.967891	1.03542	2	3	5	2	Ba2	Sm3	Ta5	0		0	10.0038	23.56	48.272	0.89	1.17	1.5	ss	air	1400			m	I2/m	6.04574	6.02154	8.50828		90.0711		77.4352			rs
Ba2SmTaO6	Ba	Sm	Ta	O	s	f	d	1.61	0.958	0.64	0.799	0.318	0.967891	1.03542	2	3	5	2	Ba2	Sm3	Ta5	0		0	10.0038	23.56	48.272	0.89	1.17	1.5	ss	air	1300			m	P21/n	6.0468	6.0225	8.5107		90.038		77.4832			rs
Ba2SmTaO6	Ba	Sm	Ta	O	s	f	d	1.61	0.958	0.64	0.799	0.318	0.967891	1.03542	2	3	5	2	Ba2	Sm3	Ta5	0		0	10.0038	23.56	48.272	0.89	1.17	1.5	ss	air	1500			m	P21/n	?	?	?		?					rs
Ba2SmUO6	Ba	Sm	U	O	s	f	f	1.61	0.958	0.76	0.859	0.198	0.942183	1.00792	2	3	5	2	Ba2	Sm3	U5	0			10.0038	23.56	46	0.89	1.17	1.38			1300			c		8.76						84.0277			rs
Ba2SmWO6	Ba	Sm	W	O	s	f	d	1.61	0.958	0.62	0.789	0.338	0.972312	1.04015	2	3	5	2	Ba2	Sm3	W5	0		1	10.0038	23.56	51.6	0.89	1.17	2.36	ss		273			c	Fm-3m	8.4467						75.3306
Ba2SrIrO6	Ba	Sr	Ir	O	s	s	d	1.61	1.18		1.18	1.18	0.824958	0.882513	2	2	6	4	Ba2	Sr2	Ir6	0	0	3	10.0038	11.0303	72	0.89	0.95	2.2	ss	HP O2	880			r		5.025			60.48			45.3471			rs?		black
Ba2SrIrO6	Ba	Sr	Ir	O	s	s	d	1.61	1.18		1.18	1.18	0.824958	0.882513	2	2	6	4	Ba2	Sr2	Ir6	0	0	3	10.0038	11.0303	72	0.89	0.95	2.2	ss	HP O2	900			r	R-3m	6.025			60.48			78.165			rs
Ba2SrIrO6	Ba	Sr	Ir	O	s	s	d	1.61	1.18		1.18	1.18	0.824958	0.882513	2	2	6	4	Ba2	Sr2	Ir6	0	0	3	10.0038	11.0303	72	0.89	0.95	2.2																	rs?
Ba2SrMoO6	Ba	Sr	Mo	O	s	s	d	1.61	1.18	0.59	0.885	0.59	0.931462	0.996448	2	2	6	4	Ba2	Sr2	Mo6	0	0	0	10.0038	11.0303	68.827	0.89	0.95	2.16	ss		1000					4.2						74.088
Ba2SrNpO6	Ba	Sr	Np	O	s	s	f	1.61	1.18	0.72	0.95	0.46	0.905698	0.968887	2	2	6	4	Ba2	Sr2	Np6	0	0		10.0038	11.0303	65	0.89	0.95	1.36	ss	O2	1200			o		6.221	6.215	8.863				85.6687			rs?
Ba2SrOsO6	Ba	Sr	Os	O	s	s	d	1.61	1.18	0.545	0.8625	0.635	0.940725	1.00636	2	2	6	4	Ba2	Sr2	Os6	0	0	2	10.0038	11.0303	70.1	0.89	0.95	2.2			1000			te		8.43		8.72				77.4607	1.0344		rs
Ba2SrPuO6	Ba	Sr	Pu	O	s	s	f	1.61	1.18	0.71	0.945	0.47	0.90763	0.970953	2	2	6	4	Ba2	Sr2	Pu6	0	0		10.0038	11.0303	80	0.89	0.95	1.28	ss	O2	1200			o		6.204	6.188	8.822				84.6699			rs?
Ba2SrReO6	Ba	Sr	Re	O	s	s	d	1.61	1.18	0.55	0.865	0.63	0.939687	1.00525	2	2	6	4	Ba2	Sr2	Re6	0	0	1	10.0038	11.0303	67	0.89	0.95	1.9		vacuum	1000			te		8.6		8.29				76.641	0.963953		rs?
Ba2SrReO6	Ba	Sr	Re	O	s	s	d	1.61	1.18	0.55	0.865	0.63	0.939687	1.00525	2	2	6	4	Ba2	Sr2	Re6	0	0	1	10.0038	11.0303	67	0.89	0.95	1.9	ss	vacuum	1000			te		6.36		8.29				83.8318	0.921685		rs		black-blue
Ba2SrTeO6	Ba	Sr	Te	O	s	s	p	1.61	1.18	0.56	0.87	0.62	0.937617	1.00303	2	2	6	4	Ba2	Sr2	Te6	0	0	10	10.0038	11.0303	69.1	0.89	0.95	2.1	ss	air	1100			r	R-3	6.0566			60.342			79.1569			rs
Ba2SrUO6	Ba	Sr	U	O	s	s	f	1.61	1.18	0.73	0.955	0.45	0.903776	0.96683	2	2	6	4	Ba2	Sr2	U6	0	0		10.0038	11.0303	62	0.89	0.95	1.38	ss	air	1400			m	P21/n	6.24163	6.26392	8.82472		89.7892		86.2546			rs	1
Ba2SrUO6	Ba	Sr	U	O	s	s	f	1.61	1.18	0.73	0.955	0.45	0.903776	0.96683	2	2	6	4	Ba2	Sr2	U6	0	0		10.0038	11.0303	62	0.89	0.95	1.38	ss	air	1000			c	Fm-3m	8.84						86.3509			rs		yellow-orange
Ba2SrUO6	Ba	Sr	U	O	s	s	f	1.61	1.18	0.73	0.955	0.45	0.903776	0.96683	2	2	6	4	Ba2	Sr2	U6	0	0		10.0038	11.0303	62	0.89	0.95	1.38	ss	air	1200			m		6.247	6.273	8.823		89.715		86.4366			rs?
Ba2SrUO6	Ba	Sr	U	O	s	s	f	1.61	1.18	0.73	0.955	0.45	0.903776	0.96683	2	2	6	4	Ba2	Sr2	U6	0	0		10.0038	11.0303	62	0.89	0.95	1.38	ss	air	1100			m	P21/n	6.2501	6.2697	8.8355		89.76		86.5568			rs
Ba2SrUO6	Ba	Sr	U	O	s	s	f	1.61	1.18	0.73	0.955	0.45	0.903776	0.96683	2	2	6	4	Ba2	Sr2	U6	0	0		10.0038	11.0303	62	0.89	0.95	1.38	ss	O2	1200			o		6.241	6.259	8.8858				86.7752			rs?
Ba2SrWO6	Ba	Sr	W	O	s	s	d	1.61	1.18	0.6	0.89	0.58	0.929429	0.994272	2	2	6	4	Ba2	Sr2	W6	0	0	0	10.0038	11.0303	64.77	0.89	0.95	2.36						~c?		8.5						76.7656			rs
Ba2SrWO6	Ba	Sr	W	O	s	s	d	1.61	1.18	0.6	0.89	0.58	0.929429	0.994272	2	2	6	4	Ba2	Sr2	W6	0	0	0	10.0038	11.0303	64.77	0.89	0.95	2.36						m	I2/m	6.1039	6.03592	8.53814		90.4325		78.6397			rs
Ba2SrWO6	Ba	Sr	W	O	s	s	d	1.61	1.18	0.6	0.89	0.58	0.929429	0.994272	2	2	6	4	Ba2	Sr2	W6	0	0	0	10.0038	11.0303	64.77	0.89	0.95	2.36	ss	air	1600			tr	F-1	8.5409	8.586	8.586	89.35	90.31	90.31	78.6964			rs	1
Ba2SrWO6	Ba	Sr	W	O	s	s	d	1.61	1.18	0.6	0.89	0.58	0.929429	0.994272	2	2	6	4	Ba2	Sr2	W6	0	0	0	10.0038	11.0303	64.77	0.89	0.95	2.36	ss	air	1300			m	I2/m	6.10677	6.03732	8.5399		90.4457		78.711			rs
Ba2SrWO6	Ba	Sr	W	O	s	s	d	1.61	1.18	0.6	0.89	0.58	0.929429	0.994272	2	2	6	4	Ba2	Sr2	W6	0	0	0	10.0038	11.0303	64.77	0.89	0.95	2.36	ss	air	1350			m	I2/m	6.10676	6.03736	8.5399		90.446		78.7114			rs
Ba2TbBiO6	Ba	Tb	Bi	O	s	f	p	1.61	0.923	0.76	0.8415	0.163	0.949539	1.01579	2	3	5	2	Ba2	Tb3	Bi5	0		10	10.0038	21.91	54.856	0.89	0	2.02	ss	air	800			c		4.299						79.4515
Ba2TbBiO6	Ba	Tb	Bi	O	s	f	p	1.61	0.923	0.76	0.8415	0.163	0.949539	1.01579	2	3	5	2	Ba2	Tb3	Bi5	0		10	10.0038	21.91	54.856	0.89	0	2.02	ss	air	1000			m	I2/m	6.1104	6.0813	8.5922		89.97		79.8198		166.567	rs	1	black
Ba2TbIrO6	Ba	Tb	Ir	O	s	f	d	1.61	0.923	0.57	0.7465	0.353	0.991564	1.06074	2	3	5	2	Ba2	Tb3	Ir5	0		4	10.0038	21.91	57	0.89	0	2.2	ss	air	1200			m	P21/n	5.9319	5.9227	8.3866		90.01		73.6613			rs	1
Ba2TbIrO6	Ba	Tb	Ir	O	s	f	d	1.61	0.923	0.57	0.7465	0.353	0.991564	1.06074	2	3	5	2	Ba2	Tb3	Ir5	0		4	10.0038	21.91	57	0.89	0	2.2	ss	air	1200			c	Fm-3m	8.3848						73.6865			rs
Ba2TbMoO6	Ba	Tb	Mo	O	s	f	d	1.61	0.923	0.61	0.7665	0.313	0.98241	1.05095	2	3	5	2	Ba2	Tb3	Mo5	0		1	10.0038	21.91	54.4167	0.89	0	2.16	ss	H2/N2	1400			c		8.425						74.7515					black
Ba2TbNbO6	Ba	Tb	Nb	O	s	f	d	1.61	0.923	0.64	0.7815	0.283	0.975655	1.04372	2	3	5	2	Ba2	Tb3	Nb5	0		0	10.0038	21.91	50.5728	0.89	0	1.6						c		4.229						75.6333			d	0
Ba2TbNbO6	Ba	Tb	Nb	O	s	f	d	1.61	0.923	0.64	0.7815	0.283	0.975655	1.04372	2	3	5	2	Ba2	Tb3	Nb5	0		0	10.0038	21.91	50.5728	0.89	0	1.6	ss	air	1400			te	I4/m	5.9816		8.4757				75.8142	1.00194		rs
Ba2TbNbO6	Ba	Tb	Nb	O	s	f	d	1.61	0.923	0.64	0.7815	0.283	0.975655	1.04372	2	3	5	2	Ba2	Tb3	Nb5	0		0	10.0038	21.91	50.5728	0.89	0	1.6	ss	air	1400			m	P21/n	5.9845	5.9838	8.482		90.063		75.9352			rs
Ba2TbNbO6	Ba	Tb	Nb	O	s	f	d	1.61	0.923	0.64	0.7815	0.283	0.975655	1.04372	2	3	5	2	Ba2	Tb3	Nb5	0		0	10.0038	21.91	50.5728	0.89	0	1.6	ss	air	1350			te	I4/m	5.98428		8.48173				75.9361	1.00221		rs
Ba2TbNbO6	Ba	Tb	Nb	O	s	f	d	1.61	0.923	0.64	0.7815	0.283	0.975655	1.04372	2	3	5	2	Ba2	Tb3	Nb5	0		0	10.0038	21.91	50.5728	0.89	0	1.6	ss	air	1500					?	?	?	?	?	?				rs
Ba2TbOsO6	Ba	Tb	Os	O	s	f	d	1.61	0.923	0.575	0.749	0.348	0.99041	1.05951	2	3	5	2	Ba2	Tb3	Os5	0		3	10.0038	21.91	55	0.89	0	2.2	ss	air	1430			c		8.39						73.8237					black
Ba2TbOsO6	Ba	Tb	Os	O	s	f	d	1.61	0.923	0.575	0.749	0.348	0.99041	1.05951	2	3	5	2	Ba2	Tb3	Os5	0		3	10.0038	21.91	55	0.89	0	2.2	ss	vacuum	900			c	Fm-3m	8.4028						74.1621
Ba2TbReO6	Ba	Tb	Re	O	s	f	d	1.61	0.923	0.58	0.7515	0.343	0.989259	1.05828	2	3	5	2	Ba2	Tb3	Re5	0		2	10.0038	21.91	51.9	0.89	0	1.9	ss	ampoule	1000			c	Fm-3m	8.399						74.0615			rs
Ba2TbReO6	Ba	Tb	Re	O	s	f	d	1.61	0.923	0.58	0.7515	0.343	0.989259	1.05828	2	3	5	2	Ba2	Tb3	Re5	0		2	10.0038	21.91	51.9	0.89	0	1.9	ss	vacuum	1100			m	P21/n	5.944	5.946	8.4075		90.02		74.2866			rs?
Ba2TbSbO6	Ba	Tb	Sb	O	s	f	p	1.61	0.923	0.6	0.7615	0.323	0.984683	1.05338	2	3	5	2	Ba2	Tb3	Sb5	0		10	10.0038	21.91	55	0.89	0	2.05			1400			c		4.214						74.8314
Ba2TbSbO6	Ba	Tb	Sb	O	s	f	p	1.61	0.923	0.6	0.7615	0.323	0.984683	1.05338	2	3	5	2	Ba2	Tb3	Sb5	0		10	10.0038	21.91	55	0.89	0	2.05	ss	air				c		4.22						75.1514					yellow
Ba2TbSbO6	Ba	Tb	Sb	O	s	f	p	1.61	0.923	0.6	0.7615	0.323	0.984683	1.05338	2	3	5	2	Ba2	Tb3	Sb5	0		10	10.0038	21.91	55	0.89	0	2.05	ss	air	1450			c	Fm-3m	8.4494						75.4028			rs	1
Ba2TbSbO6	Ba	Tb	Sb	O	s	f	p	1.61	0.923	0.6	0.7615	0.323	0.984683	1.05338	2	3	5	2	Ba2	Tb3	Sb5	0		10	10.0038	21.91	55	0.89	0	2.05	ss	air	273			c	Fm-3m	8.452						75.4725			rs?		white-yellowish white-pale orange yellow
Ba2TbSnO6	Ba	Tb	Sn	O	s	f	p	1.61	0.76	0.69	0.725	0.07	1.0016	1.07147	2	4	4	0	Ba2	Tb4	Sn4	0		10	10.0038	39.36	40.735	0.89	0	1.96	ss	air	1450			c	Pm-3m	4.19925						74.0483			d	0
Ba2TbTaO6	Ba	Tb	Ta	O	s	f	d	1.61	0.923	0.64	0.7815	0.283	0.975655	1.04372	2	3	5	2	Ba2	Tb3	Ta5	0		0	10.0038	21.91	48.272	0.89	0	1.5	ss	air	1400			c		8.44						75.1514			rs
Ba2TbTaO6	Ba	Tb	Ta	O	s	f	d	1.61	0.923	0.64	0.7815	0.283	0.975655	1.04372	2	3	5	2	Ba2	Tb3	Ta5	0		0	10.0038	21.91	48.272	0.89	0	1.5	ss	air	1400			te	I4/m	5.98166		8.47121				75.7755	1.0014		rs
Ba2TbTaO6	Ba	Tb	Ta	O	s	f	d	1.61	0.923	0.64	0.7815	0.283	0.975655	1.04372	2	3	5	2	Ba2	Tb3	Ta5	0		0	10.0038	21.91	48.272	0.89	0	1.5	ss	air	1300			m	P21/n	5.993	5.993	8.4651		90		76.0082			rs
Ba2TbTaO6	Ba	Tb	Ta	O	s	f	d	1.61	0.923	0.64	0.7815	0.283	0.975655	1.04372	2	3	5	2	Ba2	Tb3	Ta5	0		0	10.0038	21.91	48.272	0.89	0	1.5	ss	air	1500			m	P21/n	?	?	?		?					rs
Ba2TiBiO6	Ba	Ti	Bi	O	s	d	p	1.61	0.67	0.76	0.715	0.09	1.00633	1.07654	2	3	5	2	Ba2	Ti3	Bi5	0	1	10	10.0038	27.4917	54.856	0.89	1.54	2.02	ss		273			m		6.1842	6.1014	8.7523		90.222		82.5604
Ba2TiMnO6	Ba	Ti	Mn	O	s	d	d	1.61	0.605	0.53	0.5675	0.075	1.08177	1.15725	2	4	4	0	Ba2	Ti4	Mn4	0	0	3	10.0038	43.2672	51.2	0.89	1.54	1.55						h
Ba2TiMoO6	Ba	Ti	Mo	O	s	d	d	1.61	0.67	0.61	0.64	0.06	1.04333	1.11612	2	3	5	2	Ba2	Ti3	Mo5	0	1	1	10.0038	27.4917	54.4167	0.89	1.54	2.16		CO/CO2				c		4.103						69.0724
Ba2TiNbO6	Ba	Ti	Nb	O	s	d	d	1.61	0.67	0.64	0.655	0.03	1.03571	1.10797	2	3	5	2	Ba2	Ti3	Nb5	0	1	0	10.0038	27.4917	50.5728	0.89	1.54	1.6		CO/CO2				c		4.051						66.4793
Ba2TiPuO6	Ba	Ti	Pu	O	s	d	f	1.61	0.605	0.86	0.7325	0.255	0.998073	1.06771	2	4	4	0	Ba2	Ti4	Pu4	0	0		10.0038	43.2672	35	0.89	1.54	1.28	ss		950			c		8.06						65.4508
Ba2TiPuO6	Ba	Ti	Pu	O	s	d	f	1.61	0.605	0.86	0.7325	0.255	0.998073	1.06771	2	4	4	0	Ba2	Ti4	Pu4	0	0		10.0038	43.2672	35	0.89	1.54	1.28	ss		950			c		8.87						87.233
Ba2TiTaO6	Ba	Ti	Ta	O	s	d	d	1.61	0.67	0.64	0.655	0.03	1.03571	1.10797	2	3	5	2	Ba2	Ti3	Ta5	0	1	0	10.0038	27.4917	48.272	0.89	1.54	1.5		CO/CO2				c		4.063						67.0719
Ba2TiTaO6	Ba	Ti	Ta	O	s	d	d	1.61	0.67	0.64	0.655	0.03	1.03571	1.10797	2	3	5	2	Ba2	Ti3	Ta5	0	1	0	10.0038	27.4917	48.272	0.89	1.54	1.5	ss	vacuum	1500			c		4.068						67.3198
Ba2TiUO6	Ba	Ti	U	O	s	d	f	1.61	0.605	0.89	0.7475	0.285	0.991102	1.06025	2	4	4	0	Ba2	Ti4	U4	0	0		10.0038	43.2672	36.7	0.89	1.54	1.38			1300			c		8.05						65.2075			rs
Ba2TlBiO6	Ba	Tl	Bi	O	s	p	p	1.61	0.885	0.76	0.8225	0.125	0.957656	1.02447	2	3	5	2	Ba2	Tl3	Bi5	0	10	10	10.0038	29.852	54.856	0.89	1.62	2.02	ss	O2	800			te		6.0778		8.5418				78.8828	0.993775				black
Ba2TlSbO6	Ba	Tl	Sb	O	s	p	p	1.61	0.885	0.6	0.7425	0.285	0.993415	1.06272	2	3	5	2	Ba2	Tl3	Sb5	0	10	10	10.0038	29.852	55	0.89	1.62	2.05	ss	vacuum	900			c	Fm-3m	8.3809						73.5838			rs	0.9
Ba2TlSbO6	Ba	Tl	Sb	O	s	p	p	1.61	0.885	0.6	0.7425	0.285	0.993415	1.06272	2	3	5	2	Ba2	Tl3	Sb5	0	10	10	10.0038	29.852	55	0.89	1.62	2.05	ss	Au tube	900			o	Imma	5.9136	8.3969	5.9304				73.6198			d	0
Ba2TlTaO6	Ba	Tl	Ta	O	s	p	d	1.61	0.885	0.64	0.7625	0.245	0.984227	1.05289	2	3	5	2	Ba2	Tl3	Ta5	0	10	0	10.0038	29.852	48.272	0.89	1.62	1.5	ss	air	1000			c		8.42						74.6185					black
Ba2TmBiO6	Ba	Tm	Bi	O	s	f	p	1.61	0.88	0.76	0.82	0.12	0.958735	1.02562	2	3	5	2	Ba2	Tm3	Bi5	0		10	10.0038	23.68	54.856	0.89	1.25	2.02	ss	air	800			c		4.268						77.7451
Ba2TmIrO6	Ba	Tm	Ir	O	s	f	d	1.61	0.88	0.57	0.725	0.31	1.0016	1.07147	2	3	5	2	Ba2	Tm3	Ir5	0		4	10.0038	23.68	57	0.89	1.25	2.2	ss	air	1200			m	P21/n	5.8916	5.8799	8.3148		89.974		72.0104			rs	1
Ba2TmMoO6	Ba	Tm	Mo	O	s	f	d	1.61	0.88	0.61	0.745	0.27	0.992257	1.06148	2	3	5	2	Ba2	Tm3	Mo5	0		1	10.0038	23.68	54.4167	0.89	1.25	2.16	ss	H2/N2	1400			c		8.356						72.9298					black
Ba2TmNbO6	Ba	Tm	Nb	O	s	f	d	1.61	0.88	0.64	0.76	0.24	0.985366	1.05411	2	3	5	2	Ba2	Tm3	Nb5	0		0	10.0038	23.68	50.5728	0.89	1.25	1.6						c		4.201						74.1409			d	0
Ba2TmNbO6	Ba	Tm	Nb	O	s	f	d	1.61	0.88	0.64	0.76	0.24	0.985366	1.05411	2	3	5	2	Ba2	Tm3	Nb5	0		0	10.0038	23.68	50.5728	0.89	1.25	1.6	ss	air	1400			m	P21/n	5.9435	5.9423	8.4053		90.041		74.2147			rs
Ba2TmNbO6	Ba	Tm	Nb	O	s	f	d	1.61	0.88	0.64	0.76	0.24	0.985366	1.05411	2	3	5	2	Ba2	Tm3	Nb5	0		0	10.0038	23.68	50.5728	0.89	1.25	1.6	ss	air	1500					?	?	?	?	?	?				rs
Ba2TmOsO6	Ba	Tm	Os	O	s	f	d	1.61	0.88	0.575	0.7275	0.305	1.00042	1.07022	2	3	5	2	Ba2	Tm3	Os5	0		3	10.0038	23.68	55	0.89	1.25	2.2	ss	air	1420			c		8.32						71.9913					black
Ba2TmOsO6	Ba	Tm	Os	O	s	f	d	1.61	0.88	0.575	0.7275	0.305	1.00042	1.07022	2	3	5	2	Ba2	Tm3	Os5	0		3	10.0038	23.68	55	0.89	1.25	2.2	ss	vacuum	900			c	Fm-3m	8.3334						72.3397
Ba2TmReO6	Ba	Tm	Re	O	s	f	d	1.61	0.88	0.58	0.73	0.3	0.999245	1.06896	2	3	5	2	Ba2	Tm3	Re5	0		2	10.0038	23.68	51.9	0.89	1.25	1.9	ss	vacuum	1100			m	P21/n	5.898	5.898	8.3417		90		72.5444			rs?
Ba2TmReO6	Ba	Tm	Re	O	s	f	d	1.61	0.88	0.58	0.73	0.3	0.999245	1.06896	2	3	5	2	Ba2	Tm3	Re5	0		2	10.0038	23.68	51.9	0.89	1.25	1.9	ss	ampoule	1000			c	Fm-3m	8.342						72.5639			rs
Ba2TmRuO6	Ba	Tm	Ru	O	s	f	d	1.61	0.88	0.565	0.7225	0.315	1.00278	1.07274	2	3	5	2	Ba2	Tm3	Ru5	0		3	10.0038	23.68	59	0.89	1.25	2.2	ss	air	1300			c	Fm-3m	8.29						71.2153			rs
Ba2TmRuO6	Ba	Tm	Ru	O	s	f	d	1.61	0.88	0.565	0.7225	0.315	1.00278	1.07274	2	3	5	2	Ba2	Tm3	Ru5	0		3	10.0038	23.68	59	0.89	1.25	2.2	ss	air	1300			c	Fm-3m	?									rs
Ba2TmSbO6	Ba	Tm	Sb	O	s	f	p	1.61	0.88	0.6	0.74	0.28	0.994575	1.06396	2	3	5	2	Ba2	Tm3	Sb5	0		10	10.0038	23.68	55	0.89	1.25	2.05			1400			c		4.185						73.297
Ba2TmTaO6	Ba	Tm	Ta	O	s	f	d	1.61	0.88	0.64	0.76	0.24	0.985366	1.05411	2	3	5	2	Ba2	Tm3	Ta5	0		0	10.0038	23.68	48.272	0.89	1.25	1.5	ss	air	1400			c	Fm-3m	8.40487						74.2169			rs
Ba2TmTaO6	Ba	Tm	Ta	O	s	f	d	1.61	0.88	0.64	0.76	0.24	0.985366	1.05411	2	3	5	2	Ba2	Tm3	Ta5	0		0	10.0038	23.68	48.272	0.89	1.25	1.5	ss	air	1300			c	Fm-3m	8.4064						74.2575			rs
Ba2TmTaO6	Ba	Tm	Ta	O	s	f	d	1.61	0.88	0.64	0.76	0.24	0.985366	1.05411	2	3	5	2	Ba2	Tm3	Ta5	0		0	10.0038	23.68	48.272	0.89	1.25	1.5	ss	air	1500			c	Fm-3m	?									rs
Ba2VNbO6	Ba	V	Nb	O	s	d	d	1.61	0.64	0.64	0.64	0	1.04333	1.11612	2	3	5	2	Ba2	V3	Nb5	0	2	0	10.0038	29.3111	50.5728	0.89	1.63	1.6	ss	inert	1200			c	Pm-3m	4.051						66.4793
Ba2VNbO6	Ba	V	Nb	O	s	d	d	1.61	0.64	0.64	0.64	0	1.04333	1.11612	2	3	5	2	Ba2	V3	Nb5	0	2	0	10.0038	29.3111	50.5728	0.89	1.63	1.6	ss		1200			c	Pm-3m	4.051						66.4793
Ba2VTaO6	Ba	V	Ta	O	s	d	d	1.61	0.64	0.64	0.64	0	1.04333	1.11612	2	3	5	2	Ba2	V3	Ta5	0	2	0	10.0038	29.3111	48.272	0.89	1.63	1.5	ss	inert	1200			c	Pm-3m	4.053						66.5779
Ba2YbBiO6	Ba	Yb	Bi	O	s	f	p	1.61	0.868	0.76	0.814	0.108	0.961333	1.0284	2	3	5	2	Ba2	Yb3	Bi5	0		10	10.0038	25.053	54.856	0.89	0	2.02	ss	air	800			c		4.26						77.3088
Ba2YbBiO6	Ba	Yb	Bi	O	s	f	p	1.61	0.868	0.76	0.814	0.108	0.961333	1.0284	2	3	5	2	Ba2	Yb3	Bi5	0		10	10.0038	25.053	54.856	0.89	0	2.02	ss	air	1000			r	R-3	6.0252			60.037			77.3987		172.21	rs		brown
Ba2YBiO6	Ba	Y	Bi	O	s	d	p	1.61	0.9	0.76	0.83	0.14	0.954436	1.02102	2	3	5	2	Ba2	Y3	Bi5	0	0	10	10.0038	20.5244	54.856	0.89	1.22	2.02	ss	O2	1075			c	Fm-3m	8.5675						78.609			rs
Ba2YBiO6	Ba	Y	Bi	O	s	d	p	1.61	0.9	0.76	0.83	0.14	0.954436	1.02102	2	3	5	2	Ba2	Y3	Bi5	0	0	10	10.0038	20.5244	54.856	0.89	1.22	2.02						c	Fm-3m	8.5681						78.6255			rs
Ba2YBiO6	Ba	Y	Bi	O	s	d	p	1.61	0.9	0.76	0.83	0.14	0.954436	1.02102	2	3	5	2	Ba2	Y3	Bi5	0	0	10	10.0038	20.5244	54.856	0.89	1.22	2.02	ss	air	800			c		4.286						78.7329
Ba2YbIrO6	Ba	Yb	Ir	O	s	f	d	1.61	0.868	0.57	0.719	0.298	1.00443	1.07451	2	3	5	2	Ba2	Yb3	Ir5	0		4	10.0038	25.053	57	0.89	0	2.2	ss	air	1300			c		8.3						71.4734			rs?		black
Ba2YbIrO6	Ba	Yb	Ir	O	s	f	d	1.61	0.868	0.57	0.719	0.298	1.00443	1.07451	2	3	5	2	Ba2	Yb3	Ir5	0		4	10.0038	25.053	57	0.89	0	2.2	ss	air	1200			m	P21/n	5.8793	5.8682	8.301		89.969		71.598			rs	1
Ba2YbIrO6	Ba	Yb	Ir	O	s	f	d	1.61	0.868	0.57	0.719	0.298	1.00443	1.07451	2	3	5	2	Ba2	Yb3	Ir5	0		4	10.0038	25.053	57	0.89	0	2.2	ss	air	1200			m	P21/n										rs	1	black
Ba2YbMoO6	Ba	Yb	Mo	O	s	f	d	1.61	0.868	0.61	0.739	0.258	0.99504	1.06446	2	3	5	2	Ba2	Yb3	Mo5	0		1	10.0038	25.053	54.4167	0.89	0	2.16	ss	H2/N2	1400			c		8.331						72.2772					black
Ba2YbMoO6	Ba	Yb	Mo	O	s	f	d	1.61	0.868	0.61	0.739	0.258	0.99504	1.06446	2	3	5	2	Ba2	Yb3	Mo5	0		1	10.0038	25.053	54.4167	0.89	0	2.16	ss	H2/N2	1300			c	Fm-3m	8.3378						72.4543			rs	1
Ba2YbNbO6	Ba	Yb	Nb	O	s	f	d	1.61	0.868	0.64	0.754	0.228	0.988111	1.05705	2	3	5	2	Ba2	Yb3	Nb5	0		0	10.0038	25.053	50.5728	0.89	0	1.6						c		8.38						73.5601
Ba2YbNbO6	Ba	Yb	Nb	O	s	f	d	1.61	0.868	0.64	0.754	0.228	0.988111	1.05705	2	3	5	2	Ba2	Yb3	Nb5	0		0	10.0038	25.053	50.5728	0.89	0	1.6						c		4.192						73.6654			d	0
Ba2YbNbO6	Ba	Yb	Nb	O	s	f	d	1.61	0.868	0.64	0.754	0.228	0.988111	1.05705	2	3	5	2	Ba2	Yb3	Nb5	0		0	10.0038	25.053	50.5728	0.89	0	1.6	ss	air	1400			m	P21/n	5.9311	5.9303	8.3897		90.026		73.7731			rs
Ba2YbNbO6	Ba	Yb	Nb	O	s	f	d	1.61	0.868	0.64	0.754	0.228	0.988111	1.05705	2	3	5	2	Ba2	Yb3	Nb5	0		0	10.0038	25.053	50.5728	0.89	0	1.6	ss	air	1500					?	?	?	?	?	?				rs
Ba2YbOsO6	Ba	Yb	Os	O	s	f	d	1.61	0.868	0.575	0.7215	0.293	1.00325	1.07324	2	3	5	2	Ba2	Yb3	Os5	0		3	10.0038	25.053	55	0.89	0	2.2	ss	air	1350			c		8.3						71.4734					black
Ba2YbOsO6	Ba	Yb	Os	O	s	f	d	1.61	0.868	0.575	0.7215	0.293	1.00325	1.07324	2	3	5	2	Ba2	Yb3	Os5	0		3	10.0038	25.053	55	0.89	0	2.2	ss	vacuum	900			c	Fm-3m	8.3098						71.7268
Ba2YbReO6	Ba	Yb	Re	O	s	f	d	1.61	0.868	0.58	0.724	0.288	1.00207	1.07198	2	3	5	2	Ba2	Yb3	Re5	0		2	10.0038	25.053	51.9	0.89	0	1.9	ss	vacuum	1100			m	P21/n	5.89	5.89	8.3		90		71.9861			rs?
Ba2YbReO6	Ba	Yb	Re	O	s	f	d	1.61	0.868	0.58	0.724	0.288	1.00207	1.07198	2	3	5	2	Ba2	Yb3	Re5	0		2	10.0038	25.053	51.9	0.89	0	1.9	ss	ampoule	1000			c	Fm-3m	8.329						72.2252			rs
Ba2YbRuO6	Ba	Yb	Ru	O	s	f	d	1.61	0.868	0.565	0.7165	0.303	1.00562	1.07578	2	3	5	2	Ba2	Yb3	Ru5	0		3	10.0038	25.053	59	0.89	0	2.2	ss	air	1300			c	Fm-3m	8.28						70.9579			rs
Ba2YbRuO6	Ba	Yb	Ru	O	s	f	d	1.61	0.868	0.565	0.7165	0.303	1.00562	1.07578	2	3	5	2	Ba2	Yb3	Ru5	0		3	10.0038	25.053	59	0.89	0	2.2	ss	air	1300			c	Fm-3m	?									rs
Ba2YbRuO6	Ba	Yb	Ru	O	s	f	d	1.61	0.868	0.565	0.7165	0.303	1.00562	1.07578	2	3	5	2	Ba2	Yb3	Ru5	0		3	10.0038	25.053	59	0.89	0	2.2						h
Ba2YbSbO6	Ba	Yb	Sb	O	s	f	p	1.61	0.868	0.6	0.734	0.268	0.997372	1.06696	2	3	5	2	Ba2	Yb3	Sb5	0		10	10.0038	25.053	55	0.89	0	2.05			1400			c		4.18						73.0346
Ba2YbSbO6	Ba	Yb	Sb	O	s	f	p	1.61	0.868	0.6	0.734	0.268	0.997372	1.06696	2	3	5	2	Ba2	Yb3	Sb5	0		10	10.0038	25.053	55	0.89	0	2.05	ss	air				c		8.36						73.0346					white
Ba2YbSbO6	Ba	Yb	Sb	O	s	f	p	1.61	0.868	0.6	0.734	0.268	0.997372	1.06696	2	3	5	2	Ba2	Yb3	Sb5	0		10	10.0038	25.053	55	0.89	0	2.05	ss	air	273			c	Fm-3m	8.368						73.2445			rs?		white-yellowish white-pale orange yellow
Ba2YbTaO6	Ba	Yb	Ta	O	s	f	d	1.61	0.868	0.64	0.754	0.228	0.988111	1.05705	2	3	5	2	Ba2	Yb3	Ta5	0		0	10.0038	25.053	48.272	0.89	0	1.5	nitrate	air				c		4.19						73.5601					white
Ba2YbTaO6	Ba	Yb	Ta	O	s	f	d	1.61	0.868	0.64	0.754	0.228	0.988111	1.05705	2	3	5	2	Ba2	Yb3	Ta5	0		0	10.0038	25.053	48.272	0.89	0	1.5	ss	air	1400			c	Fm-3m	8.38443						73.6768			rs
Ba2YbTaO6	Ba	Yb	Ta	O	s	f	d	1.61	0.868	0.64	0.754	0.228	0.988111	1.05705	2	3	5	2	Ba2	Yb3	Ta5	0		0	10.0038	25.053	48.272	0.89	0	1.5	ss	air	1300			c	Fm-3m	8.3894						73.8079			rs
Ba2YbTaO6	Ba	Yb	Ta	O	s	f	d	1.61	0.868	0.64	0.754	0.228	0.988111	1.05705	2	3	5	2	Ba2	Yb3	Ta5	0		0	10.0038	25.053	48.272	0.89	0	1.5	ss	air	1500			c	Fm-3m	8.3903						73.8316			rs	1
Ba2YbTaO6	Ba	Yb	Ta	O	s	f	d	1.61	0.868	0.64	0.754	0.228	0.988111	1.05705	2	3	5	2	Ba2	Yb3	Ta5	0		0	10.0038	25.053	48.272	0.89	0	1.5	ss	air	1500			c	Fm-3m	?									rs
Ba2YbUO6	Ba	Yb	U	O	s	f	f	1.61	0.868	0.76	0.814	0.108	0.961333	1.0284	2	3	5	2	Ba2	Yb3	U5	0			10.0038	25.053	46	0.89	0	1.38			1300			c		8.6						79.507			rs
Ba2YbUO6	Ba	Yb	U	O	s	f	f	1.61	0.868	0.76	0.814	0.108	0.961333	1.0284	2	3	5	2	Ba2	Yb3	U5	0			10.0038	25.053	46	0.89	0	1.38	ss	Ar	1300			c		8.647						80.8177
Ba2YIrO6	Ba	Y	Ir	O	s	d	d	1.61	0.9	0.57	0.735	0.33	0.996905	1.06646	2	3	5	2	Ba2	Y3	Ir5	0	0	4	10.0038	20.5244	57	0.89	1.22	2.2	ss	air	1200			c		8.34						72.5117			rs?		black
Ba2YIrO6	Ba	Y	Ir	O	s	d	d	1.61	0.9	0.57	0.735	0.33	0.996905	1.06646	2	3	5	2	Ba2	Y3	Ir5	0	0	4	10.0038	20.5244	57	0.89	1.22	2.2	ss	air	1200			m	P21/n	5.9028	5.9029	8.351		90.039		72.7448		174.233	rs		black
Ba2YIrO6	Ba	Y	Ir	O	s	d	d	1.61	0.9	0.57	0.735	0.33	0.996905	1.06646	2	3	5	2	Ba2	Y3	Ir5	0	0	4	10.0038	20.5244	57	0.89	1.22	2.2	ss	air	1200			c	Fm-3m	8.35032						72.7812			rs?
Ba2YIrO6	Ba	Y	Ir	O	s	d	d	1.61	0.9	0.57	0.735	0.33	0.996905	1.06646	2	3	5	2	Ba2	Y3	Ir5	0	0	4	10.0038	20.5244	57	0.89	1.22	2.2	ss	HP O2	880			c		8.355						72.9037					black
Ba2YMoO6	Ba	Y	Mo	O	s	d	d	1.61	0.9	0.61	0.755	0.29	0.987653	1.05656	2	3	5	2	Ba2	Y3	Mo5	0	0	1	10.0038	20.5244	54.4167	0.89	1.22	2.16	ss	H2/N2	1250			c	Fm-3m	8.3892						73.8026			rs	1
Ba2YMoO6	Ba	Y	Mo	O	s	d	d	1.61	0.9	0.61	0.755	0.29	0.987653	1.05656	2	3	5	2	Ba2	Y3	Mo5	0	0	1	10.0038	20.5244	54.4167	0.89	1.22	2.16	ss	H2/N2	1300			c	Fm-3m	8.39091						73.8477			rs	1
Ba2YMoO6	Ba	Y	Mo	O	s	d	d	1.61	0.9	0.61	0.755	0.29	0.987653	1.05656	2	3	5	2	Ba2	Y3	Mo5	0	0	1	10.0038	20.5244	54.4167	0.89	1.22	2.16	ss	H2/N2	1400			c		8.391						73.8501					black
Ba2YMoO6	Ba	Y	Mo	O	s	d	d	1.61	0.9	0.61	0.755	0.29	0.987653	1.05656	2	3	5	2	Ba2	Y3	Mo5	0	0	1	10.0038	20.5244	54.4167	0.89	1.22	2.16	ss	H2/Ar	1300			c	Fm-3m	8.392						73.8765			rs	0.97
Ba2YMoO6	Ba	Y	Mo	O	s	d	d	1.61	0.9	0.61	0.755	0.29	0.987653	1.05656	2	3	5	2	Ba2	Y3	Mo5	0	0	1	10.0038	20.5244	54.4167	0.89	1.22	2.16	ss	H2/N2	1250														rs	1
Ba2YNbO6	Ba	Y	Nb	O	s	d	d	1.61	0.9	0.64	0.77	0.26	0.980826	1.04926	2	3	5	2	Ba2	Y3	Nb5	0	0	0	10.0038	20.5244	50.5728	0.89	1.22	1.6						c		4.18						73.0346			d	0
Ba2YNbO6	Ba	Y	Nb	O	s	d	d	1.61	0.9	0.64	0.77	0.26	0.980826	1.04926	2	3	5	2	Ba2	Y3	Nb5	0	0	0	10.0038	20.5244	50.5728	0.89	1.22	1.6	ss	air	1400			c		4.2						74.088			d
Ba2YNbO6	Ba	Y	Nb	O	s	d	d	1.61	0.9	0.64	0.77	0.26	0.980826	1.04926	2	3	5	2	Ba2	Y3	Nb5	0	0	0	10.0038	20.5244	50.5728	0.89	1.22	1.6	nitrate	air				c		4.21						74.6185					light blue
Ba2YNbO6	Ba	Y	Nb	O	s	d	d	1.61	0.9	0.64	0.77	0.26	0.980826	1.04926	2	3	5	2	Ba2	Y3	Nb5	0	0	0	10.0038	20.5244	50.5728	0.89	1.22	1.6	ss	air	1400			c		8.424						74.7249			rs
Ba2YNbO6	Ba	Y	Nb	O	s	d	d	1.61	0.9	0.64	0.77	0.26	0.980826	1.04926	2	3	5	2	Ba2	Y3	Nb5	0	0	0	10.0038	20.5244	50.5728	0.89	1.22	1.6	ss	air	1350			c	Fm-3m	8.43159						74.927			rs
Ba2YNbO6	Ba	Y	Nb	O	s	d	d	1.61	0.9	0.64	0.77	0.26	0.980826	1.04926	2	3	5	2	Ba2	Y3	Nb5	0	0	0	10.0038	20.5244	50.5728	0.89	1.22	1.6	ss	air	1400			m	P21/n	5.9647	5.9617	8.4362		90.017		74.9973			rs
Ba2YNbO6	Ba	Y	Nb	O	s	d	d	1.61	0.9	0.64	0.77	0.26	0.980826	1.04926	2	3	5	2	Ba2	Y3	Nb5	0	0	0	10.0038	20.5244	50.5728	0.89	1.22	1.6						c	Fm-3m	8.44073						75.1709			rs	1
Ba2YNbO6	Ba	Y	Nb	O	s	d	d	1.61	0.9	0.64	0.77	0.26	0.980826	1.04926	2	3	5	2	Ba2	Y3	Nb5	0	0	0	10.0038	20.5244	50.5728	0.89	1.22	1.6	ss	air	1250			c	Fm-3m	8.44073						75.1709			rs	1
Ba2YNbO6	Ba	Y	Nb	O	s	d	d	1.61	0.9	0.64	0.77	0.26	0.980826	1.04926	2	3	5	2	Ba2	Y3	Nb5	0	0	0	10.0038	20.5244	50.5728	0.89	1.22	1.6	ss	air	1250			c	Fm-3m	8.44073						75.1709			rs	1
Ba2YNbO6	Ba	Y	Nb	O	s	d	d	1.61	0.9	0.64	0.77	0.26	0.980826	1.04926	2	3	5	2	Ba2	Y3	Nb5	0	0	0	10.0038	20.5244	50.5728	0.89	1.22	1.6	ss	air	1500			c	Fm-3m	8.4411						75.1808			rs	1
Ba2YNbO6	Ba	Y	Nb	O	s	d	d	1.61	0.9	0.64	0.77	0.26	0.980826	1.04926	2	3	5	2	Ba2	Y3	Nb5	0	0	0	10.0038	20.5244	50.5728	0.89	1.22	1.6	ss	air	1500					?	?	?	?	?	?				rs
Ba2YNbO6	Ba	Y	Nb	O	s	d	d	1.61	0.9	0.64	0.77	0.26	0.980826	1.04926	2	3	5	2	Ba2	Y3	Nb5	0	0	0	10.0038	20.5244	50.5728	0.89	1.22	1.6	ss		1400
Ba2YOsO6	Ba	Y	Os	O	s	d	d	1.61	0.9	0.575	0.7375	0.325	0.995739	1.06521	2	3	5	2	Ba2	Y3	Os5	0	0	3	10.0038	20.5244	55	0.89	1.22	2.2	ss	air	1420			c		8.35						72.7729					black
Ba2YReO6	Ba	Y	Re	O	s	d	d	1.61	0.9	0.58	0.74	0.32	0.994575	1.06396	2	3	5	2	Ba2	Y3	Re5	0	0	2	10.0038	20.5244	51.9	0.89	1.22	1.9	hydrothermal		700			c	Fm-3m	8.364						73.1395			rs	0.9	black
Ba2YReO6	Ba	Y	Re	O	s	d	d	1.61	0.9	0.58	0.74	0.32	0.994575	1.06396	2	3	5	2	Ba2	Y3	Re5	0	0	2	10.0038	20.5244	51.9	0.89	1.22	1.9	ss	Ar	1300			c	Fm-3m	8.3627						73.1054			rs	1	black
Ba2YReO6	Ba	Y	Re	O	s	d	d	1.61	0.9	0.58	0.74	0.32	0.994575	1.06396	2	3	5	2	Ba2	Y3	Re5	0	0	2	10.0038	20.5244	51.9	0.89	1.22	1.9	ss	ampoule	1000			c	Fm-3m	8.372						73.3496			rs
Ba2YReO6	Ba	Y	Re	O	s	d	d	1.61	0.9	0.58	0.74	0.32	0.994575	1.06396	2	3	5	2	Ba2	Y3	Re5	0	0	2	10.0038	20.5244	51.9	0.89	1.22	1.9	ss	vacuum	1100			m	P21/n	5.9205	5.9202	8.375		90.026		73.3871			rs?
Ba2YRuO6	Ba	Y	Ru	O	s	d	d	1.61	0.9	0.565	0.7325	0.335	0.998073	1.06771	2	3	5	2	Ba2	Y3	Ru5	0	0	3	10.0038	20.5244	59	0.89	1.22	2.2	ss	air	1350			c	Fm-3m	8.33559						72.3967			rs	0.99
Ba2YRuO6	Ba	Y	Ru	O	s	d	d	1.61	0.9	0.565	0.7325	0.335	0.998073	1.06771	2	3	5	2	Ba2	Y3	Ru5	0	0	3	10.0038	20.5244	59	0.89	1.22	2.2	ss	air	1350			c	Fm-3m	8.339						72.4856			rs
Ba2YRuO6	Ba	Y	Ru	O	s	d	d	1.61	0.9	0.565	0.7325	0.335	0.998073	1.06771	2	3	5	2	Ba2	Y3	Ru5	0	0	3	10.0038	20.5244	59	0.89	1.22	2.2	ss	air	1300			c	Fm-3m	?									rs
Ba2YRuO6	Ba	Y	Ru	O	s	d	d	1.61	0.9	0.565	0.7325	0.335	0.998073	1.06771	2	3	5	2	Ba2	Y3	Ru5	0	0	3	10.0038	20.5244	59	0.89	1.22	2.2	ss	air	1300			c	Fm-3m										rs
Ba2YRuO6	Ba	Y	Ru	O	s	d	d	1.61	0.9	0.565	0.7325	0.335	0.998073	1.06771	2	3	5	2	Ba2	Y3	Ru5	0	0	3	10.0038	20.5244	59	0.89	1.22	2.2						h
Ba2YSbO6	Ba	Y	Sb	O	s	d	p	1.61	0.9	0.6	0.75	0.3	0.989949	1.05902	2	3	5	2	Ba2	Y3	Sb5	0	0	10	10.0038	20.5244	55	0.89	1.22	2.05			1400			c		4.205						74.3529
Ba2YSbO6	Ba	Y	Sb	O	s	d	p	1.61	0.9	0.6	0.75	0.3	0.989949	1.05902	2	3	5	2	Ba2	Y3	Sb5	0	0	10	10.0038	20.5244	55	0.89	1.22	2.05	ss	air				c		8.41						74.3529					white
Ba2YSbO6	Ba	Y	Sb	O	s	d	p	1.61	0.9	0.6	0.75	0.3	0.989949	1.05902	2	3	5	2	Ba2	Y3	Sb5	0	0	10	10.0038	20.5244	55	0.89	1.22	2.05	ss	air	1300			c	Fm-3m	8.4117						74.398			rs
Ba2YSbO6	Ba	Y	Sb	O	s	d	p	1.61	0.9	0.6	0.75	0.3	0.989949	1.05902	2	3	5	2	Ba2	Y3	Sb5	0	0	10	10.0038	20.5244	55	0.89	1.22	2.05	hydrothermal		260			c	Fm-3m	8.4117						74.398			rs	1
Ba2YSbO6	Ba	Y	Sb	O	s	d	p	1.61	0.9	0.6	0.75	0.3	0.989949	1.05902	2	3	5	2	Ba2	Y3	Sb5	0	0	10	10.0038	20.5244	55	0.89	1.22	2.05	ss	air	1300			c	Fm-3m	8.424						74.7249			rs	1
Ba2YTaO6	Ba	Y	Ta	O	s	d	d	1.61	0.9	0.64	0.77	0.26	0.980826	1.04926	2	3	5	2	Ba2	Y3	Ta5	0	0	0	10.0038	20.5244	48.272	0.89	1.22	1.5	ss	air	1400			c		4.205						74.3529			d
Ba2YTaO6	Ba	Y	Ta	O	s	d	d	1.61	0.9	0.64	0.77	0.26	0.980826	1.04926	2	3	5	2	Ba2	Y3	Ta5	0	0	0	10.0038	20.5244	48.272	0.89	1.22	1.5	ss	air	1400			c		8.424						74.7249			rs
Ba2YTaO6	Ba	Y	Ta	O	s	d	d	1.61	0.9	0.64	0.77	0.26	0.980826	1.04926	2	3	5	2	Ba2	Y3	Ta5	0	0	0	10.0038	20.5244	48.272	0.89	1.22	1.5	ss	air	1400			c	Fm-3m	8.43539						75.0284			rs
Ba2YTaO6	Ba	Y	Ta	O	s	d	d	1.61	0.9	0.64	0.77	0.26	0.980826	1.04926	2	3	5	2	Ba2	Y3	Ta5	0	0	0	10.0038	20.5244	48.272	0.89	1.22	1.5	ss	air	1300			c	Fm-3m	8.4368						75.066			rs
Ba2YTaO6	Ba	Y	Ta	O	s	d	d	1.61	0.9	0.64	0.77	0.26	0.980826	1.04926	2	3	5	2	Ba2	Y3	Ta5	0	0	0	10.0038	20.5244	48.272	0.89	1.22	1.5	nitrate	air				c		8.44						75.1514					white
Ba2YTaO6	Ba	Y	Ta	O	s	d	d	1.61	0.9	0.64	0.77	0.26	0.980826	1.04926	2	3	5	2	Ba2	Y3	Ta5	0	0	0	10.0038	20.5244	48.272	0.89	1.22	1.5	ss	air	1400			c	Fm-3m	8.44152						75.1921			rs
Ba2YTaO6	Ba	Y	Ta	O	s	d	d	1.61	0.9	0.64	0.77	0.26	0.980826	1.04926	2	3	5	2	Ba2	Y3	Ta5	0	0	0	10.0038	20.5244	48.272	0.89	1.22	1.5	ss	air	1500			c	Fm-3m	?									rs
Ba2YTaO6	Ba	Y	Ta	O	s	d	d	1.61	0.9	0.64	0.77	0.26	0.980826	1.04926	2	3	5	2	Ba2	Y3	Ta5	0	0	0	10.0038	20.5244	48.272	0.89	1.22	1.5	ss		1400
Ba2YUO6	Ba	Y	U	O	s	d	f	1.61	0.9	0.76	0.83	0.14	0.954436	1.02102	2	3	5	2	Ba2	Y3	U5	0	0		10.0038	20.5244	46	0.89	1.22	1.38	ss	Ar	1300			c		8.682						81.803
Ba2YUO6	Ba	Y	U	O	s	d	f	1.61	0.9	0.76	0.83	0.14	0.954436	1.02102	2	3	5	2	Ba2	Y3	U5	0	0		10.0038	20.5244	46	0.89	1.22	1.38	ss	vacuum	1000			c	Fm-3m	8.69						82.0294			rs
Ba2YVO6	Ba	Y	V	O	s	d	d	1.61	0.9	0.54	0.72	0.36	1.00396	1.074	2	3	5	2	Ba2	Y3	V5	0	0	0	10.0038	20.5244	65.2816	0.89	1.22	1.63	ss	air	900			o		9.739	7.848	7.228									white
Ba2ZnIrO6	Ba	Zn	Ir	O	s	d	d	1.61	0.74		0.74	0.74	0.994575	1.06396	2	2	6	4	Ba2	Zn2	Ir6	0	10	3	10.0038	17.9644	72	0.89	1.65	2.2	ss	HP O2	880			c		8.103						66.504			rs?		black
Ba2ZnMoO6	Ba	Zn	Mo	O	s	d	d	1.61	0.74	0.59	0.665	0.15	1.0307	1.10261	2	2	6	4	Ba2	Zn2	Mo6	0	10	0	10.0038	17.9644	68.827	0.89	1.65	2.16						c	Fm-3m	8.10339						66.5136			rs
Ba2ZnMoO6	Ba	Zn	Mo	O	s	d	d	1.61	0.74	0.59	0.665	0.15	1.0307	1.10261	2	2	6	4	Ba2	Zn2	Mo6	0	10	0	10.0038	17.9644	68.827	0.89	1.65	2.16	ss		1000			c		8.108						66.6271
Ba2ZnMoO6	Ba	Zn	Mo	O	s	d	d	1.61	0.74	0.59	0.665	0.15	1.0307	1.10261	2	2	6	4	Ba2	Zn2	Mo6	0	10	0	10.0038	17.9644	68.827	0.89	1.65	2.16	ss		1200														rs?
Ba2ZnOsO6	Ba	Zn	Os	O	s	d	d	1.61	0.74	0.545	0.6425	0.195	1.04205	1.11475	2	2	6	4	Ba2	Zn2	Os6	0	10	2	10.0038	17.9644	70.1	0.89	1.65	2.2		vacuum	1000			c		8.095						66.3072			rs
Ba2ZnPuO6	Ba	Zn	Pu	O	s	d	f	1.61	0.74	0.71	0.725	0.03	1.0016	1.07147	2	2	6	4	Ba2	Zn2	Pu6	0	10		10.0038	17.9644	80	0.89	1.65	1.28	ss		950			~c?		8.38						73.5601			rs?
Ba2ZnReO6	Ba	Zn	Re	O	s	d	d	1.61	0.74	0.55	0.645	0.19	1.04078	1.11339	2	2	6	4	Ba2	Zn2	Re6	0	10	1	10.0038	17.9644	67	0.89	1.65	1.9						c		8.106						66.5779			rs?
Ba2ZnReO6	Ba	Zn	Re	O	s	d	d	1.61	0.74	0.55	0.645	0.19	1.04078	1.11339	2	2	6	4	Ba2	Zn2	Re6	0	10	1	10.0038	17.9644	67	0.89	1.65	1.9	ss	vacuum	1000			c		8.106						66.5779			rs		black-blue
Ba2ZnReO6	Ba	Zn	Re	O	s	d	d	1.61	0.74	0.55	0.645	0.19	1.04078	1.11339	2	2	6	4	Ba2	Zn2	Re6	0	10	1	10.0038	17.9644	67	0.89	1.65	1.9	ss	N2	1000			?		8.12						66.9234			rs?
Ba2ZnTeO6	Ba	Zn	Te	O	s	d	p	1.61	0.74	0.56	0.65	0.18	1.03824	1.11068	2	2	6	4	Ba2	Zn2	Te6	0	10	10	10.0038	17.9644	69.1	0.89	1.65	2.1						h
Ba2ZnUO6	Ba	Zn	U	O	s	d	f	1.61	0.74	0.73	0.735	0.01	0.996905	1.06646	2	2	6	4	Ba2	Zn2	U6	0	10		10.0038	17.9644	62	0.89	1.65	1.38	flux	air	1150			c	Fm-3m	8.3832						73.6444			rs	1	orange
Ba2ZnUO6	Ba	Zn	U	O	s	d	f	1.61	0.74	0.73	0.735	0.01	0.996905	1.06646	2	2	6	4	Ba2	Zn2	U6	0	10		10.0038	17.9644	62	0.89	1.65	1.38	ss		1100					8.393						73.9029			rs?		orange
Ba2ZnUO6	Ba	Zn	U	O	s	d	f	1.61	0.74	0.73	0.735	0.01	0.996905	1.06646	2	2	6	4	Ba2	Zn2	U6	0	10		10.0038	17.9644	62	0.89	1.65	1.38	ss	air	1000			c	Fm-3m	8.397						74.0086			rs
Ba2ZnUO6	Ba	Zn	U	O	s	d	f	1.61	0.74	0.73	0.735	0.01	0.996905	1.06646	2	2	6	4	Ba2	Zn2	U6	0	10		10.0038	17.9644	62	0.89	1.65	1.38	ss	air	900			c	Fm-3m	8.398						74.0351			rs
Ba2ZnUO6	Ba	Zn	U	O	s	d	f	1.61	0.74	0.73	0.735	0.01	0.996905	1.06646	2	2	6	4	Ba2	Zn2	U6	0	10		10.0038	17.9644	62	0.89	1.65	1.38	ss	air				c	Fm-3m	8.398						74.0351			rs
Ba2ZnUO6	Ba	Zn	U	O	s	d	f	1.61	0.74	0.73	0.735	0.01	0.996905	1.06646	2	2	6	4	Ba2	Zn2	U6	0	10		10.0038	17.9644	62	0.89	1.65	1.38	ss	air	900			c	Fm-3m	8.4						74.088			rs
Ba2ZnWO6	Ba	Zn	W	O	s	d	d	1.61	0.74	0.6	0.67	0.14	1.02821	1.09994	2	2	6	4	Ba2	Zn2	W6	0	10	0	10.0038	17.9644	64.77	0.89	1.65	2.36	ss	air	1250			c		8.116						66.8246			rs
Ba2ZnWO6	Ba	Zn	W	O	s	d	d	1.61	0.74	0.6	0.67	0.14	1.02821	1.09994	2	2	6	4	Ba2	Zn2	W6	0	10	0	10.0038	17.9644	64.77	0.89	1.65	2.36						c	Fm-3m	8.11612						66.8275			rs
Ba2ZnWO6	Ba	Zn	W	O	s	d	d	1.61	0.74	0.6	0.67	0.14	1.02821	1.09994	2	2	6	4	Ba2	Zn2	W6	0	10	0	10.0038	17.9644	64.77	0.89	1.65	2.36	flux	air	950			c	Fm-3m	8.1362						67.3248			rs	1
Ba2ZnWO6	Ba	Zn	W	O	s	d	d	1.61	0.74	0.6	0.67	0.14	1.02821	1.09994	2	2	6	4	Ba2	Zn2	W6	0	10	0	10.0038	17.9644	64.77	0.89	1.65	2.36	ss		1200														rs?
Ba2ZrUO6	Ba	Zr	U	O	s	d	f	1.61	0.72	0.89	0.805	0.17	0.965257	1.0326	2	4	4	0	Ba2	Zr4	U4	0	0		10.0038	34.4184	36.7	0.89	1.33	1.38			1300			c		8.35						72.7729			rs
Bi2CoMnO6	Bi	Co	Mn	O	p	d	d		0.745	0.53	0.6375	0.215	0.485865	0	3	2	4	2	Bi3	Co2	Mn4	10	7	3	25.563	17.0844	51.2	2.02	1.88	1.55	HP		800			m	C2	9.4886	5.4444	9.5678		107.603					rs
Bi2CoMnO6	Bi	Co	Mn	O	p	d	d		0.745	0.53	0.6375	0.215	0.485865	0	3	2	4	2	Bi3	Co2	Mn4	10	7	3	25.563	17.0844	51.2	2.02	1.88	1.55
Bi2CuMnO6	Bi	Cu	Mn	O	p	d	d		0.73	0.53	0.63	0.2	0.48766	0	3	2	4	2	Bi3	Cu2	Mn4	10	9	3	25.563	20.2924	51.2	2.02	1.9	1.55
Bi2FeRhO6	Bi	Fe	Rh	O	p	d	d		0.645	0.55	0.5975	0.095	0.495594	0	2	3	5	2	Bi2	Fe3	Rh5	10	5	4	16.703	30.651	63	2.02	1.83	2.28	ss	air	765			o	Pnma	5.427	7.817	5.682				60.2617			d	0
Bi2NiMnO6	Bi	Ni	Mn	O	p	d	d		0.69	0.53	0.61	0.16	0.492512	0	3	2	4	2	Bi3	Ni2	Mn4	10	8	3	25.563	18.1688	51.2	2.02	1.91	1.55	HP		800			m	C2	9.463	5.42553	9.5352		107.84					rs
Bi2NiMnO6	Bi	Ni	Mn	O	p	d	d		0.69	0.53	0.61	0.16	0.492512	0	3	2	4	2	Bi3	Ni2	Mn4	10	8	3	25.563	18.1688	51.2	2.02	1.91	1.55	HP		800			m	C2	9.4646	5.423	9.5431		107.823					rs
Ca2AlNbO6	Ca	Al	Nb	O	s	p	d	1.34	0.535	0.64	0.5875	0.105	0.974829	0.953482	2	3	5	2	Ca2	Al3	Nb5	0		0	11.8717	28.4476	50.5728	1	1.61	1.6	ss	air	1400			o		5.38	5.4	7.61				55.2714			rs
Ca2AlNbO6	Ca	Al	Nb	O	s	p	d	1.34	0.535	0.64	0.5875	0.105	0.974829	0.953482	2	3	5	2	Ca2	Al3	Nb5	0		0	11.8717	28.4476	50.5728	1	1.61	1.6						m	P21/n	5.37443	5.41386	7.62197		89.955		55.443			rs	0.87
Ca2AlNbO6	Ca	Al	Nb	O	s	p	d	1.34	0.535	0.64	0.5875	0.105	0.974829	0.953482	2	3	5	2	Ca2	Al3	Nb5	0		0	11.8717	28.4476	50.5728	1	1.61	1.6	ss	air	1500			m	P21/n	5.37706	5.41557	7.6255		89.98		55.5133		157.833	rs	0.88
Ca2AlNbO6	Ca	Al	Nb	O	s	p	d	1.34	0.535	0.64	0.5875	0.105	0.974829	0.953482	2	3	5	2	Ca2	Al3	Nb5	0		0	11.8717	28.4476	50.5728	1	1.61	1.6	ss	air	1500			m	P21/n	5.37735	5.4153	7.62619		89.969		55.5186			rs	0.894
Ca2AlNbO6	Ca	Al	Nb	O	s	p	d	1.34	0.535	0.64	0.5875	0.105	0.974829	0.953482	2	3	5	2	Ca2	Al3	Nb5	0		0	11.8717	28.4476	50.5728	1	1.61	1.6	ss	air	1400			o		5.377	5.421	7.624				55.5575
Ca2AlSbO6	Ca	Al	Sb	O	s	p	p	1.34	0.535	0.6	0.5675	0.065	0.984738	0.963175	2	3	5	2	Ca2	Al3	Sb5	0		10	11.8717	28.4476	55	1	1.61	2.05			1400			~c		3.81						55.3063
Ca2AlTaO6	Ca	Al	Ta	O	s	p	d	1.34	0.535	0.64	0.5875	0.105	0.974829	0.953482	2	3	5	2	Ca2	Al3	Ta5	0		0	11.8717	28.4476	48.272	1	1.61	1.5	ss	air	1400			o		5.38	5.4	7.61				55.2714			rs
Ca2AlTaO6	Ca	Al	Ta	O	s	p	d	1.34	0.535	0.64	0.5875	0.105	0.974829	0.953482	2	3	5	2	Ca2	Al3	Ta5	0		0	11.8717	28.4476	48.272	1	1.61	1.5	ss	air	1400			o		5.382	5.427	7.631				55.7218
Ca2AlTaO6	Ca	Al	Ta	O	s	p	d	1.34	0.535	0.64	0.5875	0.105	0.974829	0.953482	2	3	5	2	Ca2	Al3	Ta5	0		0	11.8717	28.4476	48.272	1	1.61	1.5	ss	air	1450			m	P21/n	5.3915	5.4321	7.6508		90.076		56.0175			rs	0.94
Ca2CaMoO6	Ca	Ca	Mo	O	s	s	d	1.34	1	0.59	0.795	0.41	0.882675	0.863347	2	2	6	4	Ca2	Ca2	Mo6	0	0	0	11.8717	11.8717	68.827	1	1	2.16						m	P21/n	5.5518	5.81	8.0066		89.808		64.5648			rs
Ca2CaOsO6	Ca	Ca	Os	O	s	s	d	1.34	1	0.545	0.7725	0.455	0.891817	0.872288	2	2	6	4	Ca2	Ca2	Os6	0	0	2	11.8717	11.8717	70.1	1	1	2.2	HP		1400			m	P21/n	5.5403	5.8049	7.9761		90.02		64.1296		143.733	rs	1
Ca2CaOsO6	Ca	Ca	Os	O	s	s	d	1.34	1	0.545	0.7725	0.455	0.891817	0.872288	2	2	6	4	Ca2	Ca2	Os6	0	0	2	11.8717	11.8717	70.1	1	1	2.2						o		5.73	7.87	5.8				65.3879			rs
Ca2CaReO6	Ca	Ca	Re	O	s	s	d	1.34	1	0.55	0.775	0.45	0.890792	0.871286	2	2	6	4	Ca2	Ca2	Re6	0	0	1	11.8717	11.8717	67	1	1	1.9	ss	vacuum	1000			o		11.48	16.02	10.96							rs
Ca2CaReO6	Ca	Ca	Re	O	s	s	d	1.34	1	0.55	0.775	0.45	0.890792	0.871286	2	2	6	4	Ca2	Ca2	Re6	0	0	1	11.8717	11.8717	67	1	1	1.9	ss	vacuum	800			m	P21/n	5.53664	5.80322	7.98492		90.073		64.1395		144.067	rs
Ca2CaReO6	Ca	Ca	Re	O	s	s	d	1.34	1	0.55	0.775	0.45	0.890792	0.871286	2	2	6	4	Ca2	Ca2	Re6	0	0	1	11.8717	11.8717	67	1	1	1.9		vacuum	1000			o		5.67	8.05	5.78				65.9549			rs
Ca2CaTeO6	Ca	Ca	Te	O	s	s	p	1.34	1	0.56	0.78	0.44	0.888749	0.869287	2	2	6	4	Ca2	Ca2	Te6	0	0	10	11.8717	11.8717	69.1	1	1	2.1			1350			m		4	3.99	4		92.1		63.7971			rs?
Ca2CaTeO6	Ca	Ca	Te	O	s	s	p	1.34	1	0.56	0.78	0.44	0.888749	0.869287	2	2	6	4	Ca2	Ca2	Te6	0	0	10	11.8717	11.8717	69.1	1	1	2.1	ss					m											rs?
Ca2CaUO6	Ca	Ca	U	O	s	s	f	1.34	1	0.73	0.865	0.27	0.855396	0.836665	2	2	6	4	Ca2	Ca2	U6	0	0		11.8717	11.8717	62	1	1	1.38	ss	air	1000			o		5.95	8.26	5.73				70.4031			rs		yellow-orange
Ca2CaUO6	Ca	Ca	U	O	s	s	f	1.34	1	0.73	0.865	0.27	0.855396	0.836665	2	2	6	4	Ca2	Ca2	U6	0	0		11.8717	11.8717	62	1	1	1.38	flux	N2	900			m	P21/n	5.728	5.956	8.298		90.55		70.7703			rs	0.92
Ca2CaUO6	Ca	Ca	U	O	s	s	f	1.34	1	0.73	0.865	0.27	0.855396	0.836665	2	2	6	4	Ca2	Ca2	U6	0	0		11.8717	11.8717	62	1	1	1.38	ss	air	1200			m	P21/n	5.7292	5.9562	8.2991		90.56		70.7968			rs
Ca2CaUO6	Ca	Ca	U	O	s	s	f	1.34	1	0.73	0.865	0.27	0.855396	0.836665	2	2	6	4	Ca2	Ca2	U6	0	0		11.8717	11.8717	62	1	1	1.38						m		5.7278	5.9583	8.3008		90.573		70.8188		138.533	rs
Ca2CaWO6	Ca	Ca	W	O	s	s	d	1.34	1	0.6	0.8	0.4	0.880669	0.861385	2	2	6	4	Ca2	Ca2	W6	0	0	0	11.8717	11.8717	64.77	1	1	2.36						~c?		8						64			rs
Ca2CaWO6	Ca	Ca	W	O	s	s	d	1.34	1	0.6	0.8	0.4	0.880669	0.861385	2	2	6	4	Ca2	Ca2	W6	0	0	0	11.8717	11.8717	64.77	1	1	2.36	ss		1350			m	P21/n	5.5518	5.81	8.0066		89.808		64.5648		143.187	rs
Ca2CaWO6	Ca	Ca	W	O	s	s	d	1.34	1	0.6	0.8	0.4	0.880669	0.861385	2	2	6	4	Ca2	Ca2	W6	0	0	0	11.8717	11.8717	64.77	1	1	2.36	ss		1200														rs?
Ca2CdReO6	Ca	Cd	Re	O	s	d	d	1.34	0.95	0.55	0.75	0.4	0.90115	0.881417	2	2	6	4	Ca2	Cd2	Re6	0	10	1	11.8717	16.9083	67	1	1.69	1.9		vacuum	1000			o		5.64	7.99	5.77				65.0042			rs
Ca2CdTeO6	Ca	Cd	Te	O	s	d	p	1.34	0.95	0.56	0.755	0.39	0.899059	0.879372	2	2	6	4	Ca2	Cd2	Te6	0	10	10	11.8717	16.9083	69.1	1	1.69	2.1			1200			m		4.01	3.98	4.01		92		63.9598			rs?
Ca2CdTeO6	Ca	Cd	Te	O	s	d	p	1.34	0.95	0.56	0.755	0.39	0.899059	0.879372	2	2	6	4	Ca2	Cd2	Te6	0	10	10	11.8717	16.9083	69.1	1	1.69	2.1	ss					m											rs?
Ca2CdWO6	Ca	Cd	W	O	s	d	d	1.34	0.95	0.6	0.775	0.35	0.890792	0.871286	2	2	6	4	Ca2	Cd2	W6	0	10	0	11.8717	16.9083	64.77	1	1.69	2.36	ss		1250			o	Pmm2	5.835	5.572	8.024				65.2203
Ca2CoNbO6	Ca	Co	Nb	O	s	d	d	1.34	0.61	0.64	0.625	0.03	0.956777	0.935825	2	3	5	2	Ca2	Co3	Nb5	0	6	0	11.8717	33.5	50.5728	1	1.88	1.6	ss	air	1250			m	P21/n	5.4797	5.6051	7.8119		89.96		59.9842		156.06	rs	0.38
Ca2CoOsO6	Ca	Co	Os	O	s	d	d	1.34	0.745	0.545	0.645	0.2	0.947419	0.926673	2	2	6	4	Ca2	Co2	Os6	0	7	2	11.8717	17.0844	70.1	1	1.88	2.2						o		5.47	7.7	5.59				58.8613			rs?
Ca2CoReO6	Ca	Co	Re	O	s	d	d	1.34	0.745	0.55	0.6475	0.195	0.946263	0.925541	2	2	6	4	Ca2	Co2	Re6	0	7	1	11.8717	17.0844	67	1	1.88	1.9	ss	Ar/vacuum	1400			m	P21/n	5.40266	5.57347	7.68607		89.7949		57.8595		150.487	rs	1
Ca2CoReO6	Ca	Co	Re	O	s	d	d	1.34	0.745	0.55	0.6475	0.195	0.946263	0.925541	2	2	6	4	Ca2	Co2	Re6	0	7	1	11.8717	17.0844	67	1	1.88	1.9		vacuum	1000			o		5.46	7.71	5.58				58.7248			rs
Ca2CoTaO6	Ca	Co	Ta	O	s	d	d	1.34	0.61	0.64	0.625	0.03	0.956777	0.935825	2	3	5	2	Ca2	Co3	Ta5	0	6	0	11.8717	33.5	48.272	1	1.88	1.5	ss	air	1250			m	P21/n	5.507	5.564	7.798		89.99		59.7345			rs?
Ca2CoTeO6	Ca	Co	Te	O	s	d	p	1.34	0.745	0.56	0.6525	0.185	0.943957	0.923287	2	2	6	4	Ca2	Co2	Te6	0	7	10	11.8717	17.0844	69.1	1	1.88	2.1			1350			m		3.88	3.85	3.88		91.4		57.9421			rs?
Ca2CoTeO6	Ca	Co	Te	O	s	d	p	1.34	0.745	0.56	0.6525	0.185	0.943957	0.923287	2	2	6	4	Ca2	Co2	Te6	0	7	10	11.8717	17.0844	69.1	1	1.88	2.1	ss	air	950			m	P21/n	5.4569	5.5904	7.7399		90.239		59.0283		149.727	rs	1	gray
Ca2CoTeO6	Ca	Co	Te	O	s	d	p	1.34	0.745	0.56	0.6525	0.185	0.943957	0.923287	2	2	6	4	Ca2	Co2	Te6	0	7	10	11.8717	17.0844	69.1	1	1.88	2.1	ss					m	P21/n							59.319		150	rs	0.8
Ca2CoTeO6	Ca	Co	Te	O	s	d	p	1.34	0.745	0.56	0.6525	0.185	0.943957	0.923287	2	2	6	4	Ca2	Co2	Te6	0	7	10	11.8717	17.0844	69.1	1	1.88	2.1	ss					m											rs?
Ca2CoWO6	Ca	Co	W	O	s	d	d	1.34	0.745	0.6	0.6725	0.145	0.934848	0.914377	2	2	6	4	Ca2	Co2	W6	0	7	0	11.8717	17.0844	64.77	1	1.88	2.36	sol-gel	air	1100			m	P21/n	5.42475	5.57959	7.7134		90.245		58.3665		150.32	rs	1	brown
Ca2CoWO6	Ca	Co	W	O	s	d	d	1.34	0.745	0.6	0.6725	0.145	0.934848	0.914377	2	2	6	4	Ca2	Co2	W6	0	7	0	11.8717	17.0844	64.77	1	1.88	2.36	ss	air	1000			m	P21/n	5.4264	5.5778	7.7175		90.218		58.3967			rs
Ca2CoWO6	Ca	Co	W	O	s	d	d	1.34	0.745	0.6	0.6725	0.145	0.934848	0.914377	2	2	6	4	Ca2	Co2	W6	0	7	0	11.8717	17.0844	64.77	1	1.88	2.36	ss	air/O2	1300			o		5.6	5.43	7.73				58.7635			rs
Ca2CrMoO6	Ca	Cr	Mo	O	s	d	d	1.34	0.615	0.61	0.6125	0.005	0.962719	0.941638	2	3	5	2	Ca2	Cr3	Mo5	0	3	1	11.8717	30.959	54.4167	1	1.66	2.16	ss	vacuum	1000			o		5.49	7.7	5.36				56.6458					black
Ca2CrMoO6	Ca	Cr	Mo	O	s	d	d	1.34	0.615	0.61	0.6125	0.005	0.962719	0.941638	2	3	5	2	Ca2	Cr3	Mo5	0	3	1	11.8717	30.959	54.4167	1	1.66	2.16	ss	H2/Ar	1290			o	Pbnm	5.411	5.4795	7.6938				57.0295		155.2	d	0	black
Ca2CrNbO6	Ca	Cr	Nb	O	s	d	d	1.34	0.615	0.64	0.6275	0.025	0.955597	0.934671	2	3	5	2	Ca2	Cr3	Nb5	0	3	0	11.8717	30.959	50.5728	1	1.66	1.6	ss	air	1400			m		3.85	3.85	3.85		90.7833		57.0613			d	0
Ca2CrNbO6	Ca	Cr	Nb	O	s	d	d	1.34	0.615	0.64	0.6275	0.025	0.955597	0.934671	2	3	5	2	Ca2	Cr3	Nb5	0	3	0	11.8717	30.959	50.5728	1	1.66	1.6	ss	air	1200			m	P21/n	5.4198	5.4868	7.706		89.99		57.289			rs	0.52	green
Ca2CrNbO6	Ca	Cr	Nb	O	s	d	d	1.34	0.615	0.64	0.6275	0.025	0.955597	0.934671	2	3	5	2	Ca2	Cr3	Nb5	0	3	0	11.8717	30.959	50.5728	1	1.66	1.6	ss/solution	N2	1300			m	P21/n	5.4195	5.4907	7.7073		90.01		57.3362		154.557	rs/d	0.48	brown
Ca2CrOsO6	Ca	Cr	Os	O	s	d	d	1.34	0.615	0.575	0.595	0.04	0.971164	0.949898	2	3	5	2	Ca2	Cr3	Os5	0	3	3	11.8717	30.959	55	1	1.66	2.2		vacuum	1000			o		5.38	7.66	5.47				56.3558
Ca2CrReO6	Ca	Cr	Re	O	s	d	d	1.34	0.615	0.58	0.5975	0.035	0.969949	0.948709	2	3	5	2	Ca2	Cr3	Re5	0	3	2	11.8717	30.959	51.9	1	1.66	1.9	ss	Ar/vacuum	1400			m	P21/n	5.38863	5.46039	7.65984		89.962		56.3458		154.137	rs	0.853
Ca2CrReO6	Ca	Cr	Re	O	s	d	d	1.34	0.615	0.58	0.5975	0.035	0.969949	0.948709	2	3	5	2	Ca2	Cr3	Re5	0	3	2	11.8717	30.959	51.9	1	1.66	1.9	ss	vacuum/Ar	1400			m	P21/n	5.38	5.46	7.95		90		58.3824			rs	0.88
Ca2CrReO6	Ca	Cr	Re	O	s	d	d	1.34	0.615	0.58	0.5975	0.035	0.969949	0.948709	2	3	5	2	Ca2	Cr3	Re5	0	3	2	11.8717	30.959	51.9	1	1.66	1.9	ss	ampoule	1000			o		5.38	7.67	5.47				56.4293			rs
Ca2CrReO6	Ca	Cr	Re	O	s	d	d	1.34	0.615	0.58	0.5975	0.035	0.969949	0.948709	2	3	5	2	Ca2	Cr3	Re5	0	3	2	11.8717	30.959	51.9	1	1.66	1.9						o		5.38	7.67	5.47				56.4293
Ca2CrSbO6	Ca	Cr	Sb	O	s	d	p	1.34	0.615	0.6	0.6075	0.015	0.965117	0.943983	2	3	5	2	Ca2	Cr3	Sb5	0	3	10	11.8717	30.959	55	1	1.66	2.05	ss	air	1150			m	P21/n	5.4077	5.4935	7.6899		90.101		57.1113		152.47	rs	0.844
Ca2CrSbO6	Ca	Cr	Sb	O	s	d	p	1.34	0.615	0.6	0.6075	0.015	0.965117	0.943983	2	3	5	2	Ca2	Cr3	Sb5	0	3	10	11.8717	30.959	55	1	1.66	2.05	ss	air	1150			m	P21/n	5.4932	5.4081	7.6901		90.0022		57.1139		153	rs	0.844	brown
Ca2CrSbO6	Ca	Cr	Sb	O	s	d	p	1.34	0.615	0.6	0.6075	0.015	0.965117	0.943983	2	3	5	2	Ca2	Cr3	Sb5	0	3	10	11.8717	30.959	55	1	1.66	2.05			1400			~c		3.86						57.5125
Ca2CrTaO6	Ca	Cr	Ta	O	s	d	d	1.34	0.615	0.64	0.6275	0.025	0.955597	0.934671	2	3	5	2	Ca2	Cr3	Ta5	0	3	0	11.8717	30.959	48.272	1	1.66	1.5	ss	air	1400			m		3.85	3.85	3.85		90.7833		57.0613			d	0
Ca2CrTaO6	Ca	Cr	Ta	O	s	d	d	1.34	0.615	0.64	0.6275	0.025	0.955597	0.934671	2	3	5	2	Ca2	Cr3	Ta5	0	3	0	11.8717	30.959	48.272	1	1.66	1.5	ss	N2	1350			m	P21/n	5.4199	5.4936	7.7108		90.02		57.3968		153.667	rs	0.452
Ca2CrTaO6	Ca	Cr	Ta	O	s	d	d	1.34	0.615	0.64	0.6275	0.025	0.955597	0.934671	2	3	5	2	Ca2	Cr3	Ta5	0	3	0	11.8717	30.959	48.272	1	1.66	1.5	ss	air	1200			m	P21/n	5.4283	5.4904	7.7137		89.99		57.4739			rs	?
Ca2CrTaO6	Ca	Cr	Ta	O	s	d	d	1.34	0.615	0.64	0.6275	0.025	0.955597	0.934671	2	3	5	2	Ca2	Cr3	Ta5	0	3	0	11.8717	30.959	48.272	1	1.66	1.5	ss	air	1500			m	P21/n	5.42456	5.49772	7.7166		90.014		57.5325		154.033	rs	0.6
Ca2CrTaO6	Ca	Cr	Ta	O	s	d	d	1.34	0.615	0.64	0.6275	0.025	0.955597	0.934671	2	3	5	2	Ca2	Cr3	Ta5	0	3	0	11.8717	30.959	48.272	1	1.66	1.5						m	P21/n	5.4287	5.50201	7.72254		90.031		57.6657			rs	0.56
Ca2CrTaO6	Ca	Cr	Ta	O	s	d	d	1.34	0.615	0.64	0.6275	0.025	0.955597	0.934671	2	3	5	2	Ca2	Cr3	Ta5	0	3	0	11.8717	30.959	48.272	1	1.66	1.5	ss	air	1500			m	P21/n	5.4287	5.50201	7.72254		90.031		57.6657		153.8	rs	0.56
Ca2CrTiO6	Ca	Cr	Ti	O	s	d	d	1.34	0.55	0.605	0.5775	0.055	0.979759	0.958304	2	4	4	0	Ca2	Cr4	Ti4	0	2	0	11.8717	49.16	43.2672	1	1.66	1.54	ss	air	1350			o	Pbnm	5.3511	5.39366	7.58738				54.7468			d	0
Ca2CrWO6	Ca	Cr	W	O	s	d	d	1.34	0.615	0.62	0.6175	0.005	0.960333	0.939304	2	3	5	2	Ca2	Cr3	W5	0	3	1	11.8717	30.959	51.6	1	1.66	2.36	ss	H2/Ar	1400			m	P21/n	5.39	5.45	7.66		90.1		56.254			rs	0.74
Ca2CrWO6	Ca	Cr	W	O	s	d	d	1.34	0.615	0.62	0.6175	0.005	0.960333	0.939304	2	3	5	2	Ca2	Cr3	W5	0	3	1	11.8717	30.959	51.6	1	1.66	2.36	ss	vacuum	1000			o		5.47	7.7	5.35				56.3342					black
Ca2DyNbO6	Ca	Dy	Nb	O	s	f	d	1.34	0.912	0.64	0.776	0.272	0.890383	0.870885	2	3	5	2	Ca2	Dy3	Nb5	0		0	11.8717	22.93	50.5728	1	1.22	1.6	ss	air	1400			o		5.58	5.81	8.06				65.3259			rs
Ca2DyNbO6	Ca	Dy	Nb	O	s	f	d	1.34	0.912	0.64	0.776	0.272	0.890383	0.870885	2	3	5	2	Ca2	Dy3	Nb5	0		0	11.8717	22.93	50.5728	1	1.22	1.6			1400			o		5.575	5.823	8.052				65.3485
Ca2DyNbO6	Ca	Dy	Nb	O	s	f	d	1.34	0.912	0.64	0.776	0.272	0.890383	0.870885	2	3	5	2	Ca2	Dy3	Nb5	0		0	11.8717	22.93	50.5728	1	1.22	1.6	ss		1350			m	P21/n	5.573	5.833	8.068		90		65.5672			rs
Ca2DyRuO6	Ca	Dy	Ru	O	s	f	d	1.34	0.912	0.565	0.7385	0.347	0.905996	0.886157	2	3	5	2	Ca2	Dy3	Ru5	0		3	11.8717	22.93	59	1	1.22	2.2	ss	air	1200			m	P21/n	5.5	5.63	8.20244		90.05		63.4971			rs	1
Ca2DyRuO6	Ca	Dy	Ru	O	s	f	d	1.34	0.912	0.565	0.7385	0.347	0.905996	0.886157	2	3	5	2	Ca2	Dy3	Ru5	0		3	11.8717	22.93	59	1	1.22	2.2	ss
Ca2DySbO6	Ca	Dy	Sb	O	s	f	p	1.34	0.912	0.6	0.756	0.312	0.898642	0.878964	2	3	5	2	Ca2	Dy3	Sb5	0		10	11.8717	22.93	55	1	1.22	2.05			1300			o		5.58	5.809	8.053				65.2579
Ca2DySbO6	Ca	Dy	Sb	O	s	f	p	1.34	0.912	0.6	0.756	0.312	0.898642	0.878964	2	3	5	2	Ca2	Dy3	Sb5	0		10	11.8717	22.93	55	1	1.22	2.05			1400			m		4.044	4.036	4.044		92.3		65.9513
Ca2DyTaO6	Ca	Dy	Ta	O	s	f	d	1.34	0.912	0.64	0.776	0.272	0.890383	0.870885	2	3	5	2	Ca2	Dy3	Ta5	0		0	11.8717	22.93	48.272	1	1.22	1.5			1300			o		5.576	5.82	8.052				65.3265
Ca2DyTaO6	Ca	Dy	Ta	O	s	f	d	1.34	0.912	0.64	0.776	0.272	0.890383	0.870885	2	3	5	2	Ca2	Dy3	Ta5	0		0	11.8717	22.93	48.272	1	1.22	1.5	ss	air	1400			o		5.58	5.82	8.06				65.4383			rs
Ca2DyTaO6	Ca	Dy	Ta	O	s	f	d	1.34	0.912	0.64	0.776	0.272	0.890383	0.870885	2	3	5	2	Ca2	Dy3	Ta5	0		0	11.8717	22.93	48.272	1	1.22	1.5	ss		1400			m	P21/n	5.584	5.828	8.076		90.1		65.7053
Ca2ErNbO6	Ca	Er	Nb	O	s	f	d	1.34	0.89	0.64	0.765	0.25	0.894907	0.87531	2	3	5	2	Ca2	Er3	Nb5	0		0	11.8717	22.74	50.5728	1	1.24	1.6	ss	air	1400			o		5.57	5.79	8.02				64.6619			rs
Ca2ErNbO6	Ca	Er	Nb	O	s	f	d	1.34	0.89	0.64	0.765	0.25	0.894907	0.87531	2	3	5	2	Ca2	Er3	Nb5	0		0	11.8717	22.74	50.5728	1	1.24	1.6			1400			o		5.576	5.787	8.03				64.7786
Ca2ErNbO6	Ca	Er	Nb	O	s	f	d	1.34	0.89	0.64	0.765	0.25	0.894907	0.87531	2	3	5	2	Ca2	Er3	Nb5	0		0	11.8717	22.74	50.5728	1	1.24	1.6	flux		1350			m	P21/n	5.579	5.795	8.032		90.04		64.9192			rs
Ca2ErRuO6	Ca	Er	Ru	O	s	f	d	1.34	0.89	0.565	0.7275	0.325	0.91068	0.890739	2	3	5	2	Ca2	Er3	Ru5	0		3	11.8717	22.74	59	1	1.24	2.2	ss	air	1200			m	P21/n	5.53	5.62	8.13173		90.3		63.1798			rs	1
Ca2ErRuO6	Ca	Er	Ru	O	s	f	d	1.34	0.89	0.565	0.7275	0.325	0.91068	0.890739	2	3	5	2	Ca2	Er3	Ru5	0		3	11.8717	22.74	59	1	1.24	2.2	ss
Ca2ErSbO6	Ca	Er	Sb	O	s	f	p	1.34	0.89	0.6	0.745	0.29	0.903251	0.883471	2	3	5	2	Ca2	Er3	Sb5	0		10	11.8717	22.74	55	1	1.24	2.05			1300			o		5.577	5.788	8.032				64.8176
Ca2ErSbO6	Ca	Er	Sb	O	s	f	p	1.34	0.89	0.6	0.745	0.29	0.903251	0.883471	2	3	5	2	Ca2	Er3	Sb5	0		10	11.8717	22.74	55	1	1.24	2.05			1400			m		4.02	4.019	4.02		92		64.9091
Ca2ErTaO6	Ca	Er	Ta	O	s	f	d	1.34	0.89	0.64	0.765	0.25	0.894907	0.87531	2	3	5	2	Ca2	Er3	Ta5	0		0	11.8717	22.74	48.272	1	1.24	1.5	ss	air	1400			o		5.58	5.79	8.03				64.8587			rs
Ca2ErTaO6	Ca	Er	Ta	O	s	f	d	1.34	0.89	0.64	0.765	0.25	0.894907	0.87531	2	3	5	2	Ca2	Er3	Ta5	0		0	11.8717	22.74	48.272	1	1.24	1.5			1300			o		5.574	5.796	8.032				64.8723
Ca2ErTaO6	Ca	Er	Ta	O	s	f	d	1.34	0.89	0.64	0.765	0.25	0.894907	0.87531	2	3	5	2	Ca2	Er3	Ta5	0		0	11.8717	22.74	48.272	1	1.24	1.5	ss		1400			m	P21/n	5.588	5.798	8.042		90		65.1386
Ca2EuNbO6	Ca	Eu	Nb	O	s	f	d	1.34	0.947	0.64	0.7935	0.307	0.883279	0.863937	2	3	5	2	Ca2	Eu3	Nb5	0		0	11.8717	24.92	50.5728	1	0	1.6			1400			o		5.576	5.85	8.073				65.8345
Ca2EuNbO6	Ca	Eu	Nb	O	s	f	d	1.34	0.947	0.64	0.7935	0.307	0.883279	0.863937	2	3	5	2	Ca2	Eu3	Nb5	0		0	11.8717	24.92	50.5728	1	0	1.6	ss		1350			m	P21/n	5.58	5.86	8.093		90.25		66.1572			rs
Ca2EuRuO6	Ca	Eu	Ru	O	s	f	d	1.34	0.947	0.565	0.756	0.382	0.898642	0.878964	2	3	5	2	Ca2	Eu3	Ru5	0		3	11.8717	24.92	59	1	0	2.2	ss	air	1200			te?		7.968		7.872				62.4732			d?
Ca2EuRuO6	Ca	Eu	Ru	O	s	f	d	1.34	0.947	0.565	0.756	0.382	0.898642	0.878964	2	3	5	2	Ca2	Eu3	Ru5	0		3	11.8717	24.92	59	1	0	2.2			1120			te / c		7.96 / 7.95		7.87				62.332			d	0
Ca2EuRuO6	Ca	Eu	Ru	O	s	f	d	1.34	0.947	0.565	0.756	0.382	0.898642	0.878964	2	3	5	2	Ca2	Eu3	Ru5	0		3	11.8717	24.92	59	1	0	2.2	ss	air	1200			m	P21/n	5.53	5.65	8.24487		90.05		64.4016			rs	1
Ca2EuRuO6	Ca	Eu	Ru	O	s	f	d	1.34	0.947	0.565	0.756	0.382	0.898642	0.878964	2	3	5	2	Ca2	Eu3	Ru5	0		3	11.8717	24.92	59	1	0	2.2	ss
Ca2EuSbO6	Ca	Eu	Sb	O	s	f	p	1.34	0.947	0.6	0.7735	0.347	0.891407	0.871887	2	3	5	2	Ca2	Eu3	Sb5	0		10	11.8717	24.92	55	1	0	2.05			1300			o		5.579	5.846	8.076				65.8493
Ca2EuTaO6	Ca	Eu	Ta	O	s	f	d	1.34	0.947	0.64	0.7935	0.307	0.883279	0.863937	2	3	5	2	Ca2	Eu3	Ta5	0		0	11.8717	24.92	48.272	1	0	1.5			1300			o		5.581	5.855	8.086				66.0561
Ca2EuTaO6	Ca	Eu	Ta	O	s	f	d	1.34	0.947	0.64	0.7935	0.307	0.883279	0.863937	2	3	5	2	Ca2	Eu3	Ta5	0		0	11.8717	24.92	48.272	1	0	1.5	ss		1400			m	P21/n	5.586	5.861	8.098		90.29		66.2804
Ca2FeBiO6	Ca	Fe	Bi	O	s	d	p	1.34	0.645	0.76	0.7025	0.115	0.921509	0.90133	2	3	5	2	Ca2	Fe3	Bi5	0	5	10	11.8717	30.651	54.856	1	1.83	2.02	ss	O2	800			m		4.164	4.155	4.164		90.65		72.0385
Ca2FeIrO6	Ca	Fe	Ir	O	s	d	d	1.34	0.645	0.57	0.6075	0.075	0.965117	0.943983	2	3	5	2	Ca2	Fe3	Ir5	0	5	4	11.8717	30.651	57	1	1.83	2.2	ss	air	1100			m	P21/n	5.397	5.507	7.684		90.01		57.0946			rs	0.8
Ca2FeMoO6	Ca	Fe	Mo	O	s	d	d	1.34	0.78	0.59	0.685	0.19	0.929243	0.908895	2	2	6	4	Ca2	Fe2	Mo6	0	6	0	11.8717	16.1992	68.827	1	1.83	2.16	ss	H2/N2	1200			m	P21/n	5.4121	5.5183	7.7046		90.04		57.5256		151.03	rs	0.92
Ca2FeMoO6	Ca	Fe	Mo	O	s	d	d	1.34	0.78	0.59	0.685	0.19	0.929243	0.908895	2	2	6	4	Ca2	Fe2	Mo6	0	6	0	11.8717	16.1992	68.827	1	1.83	2.16	ss	H2/Ar	1100			m	P21/n	5.416	5.527	7.698		90.04		57.6084			rs
Ca2FeMoO6	Ca	Fe	Mo	O	s	d	d	1.34	0.78	0.59	0.685	0.19	0.929243	0.908895	2	2	6	4	Ca2	Fe2	Mo6	0	6	0	11.8717	16.1992	68.827	1	1.83	2.16	sol-gel	H2/N2	850			m	P21/n	5.415	5.5224	7.7066		89.969		57.6141		152.8	rs		black
Ca2FeMoO6	Ca	Fe	Mo	O	s	d	d	1.34	0.78	0.59	0.685	0.19	0.929243	0.908895	2	2	6	4	Ca2	Fe2	Mo6	0	6	0	11.8717	16.1992	68.827	1	1.83	2.16	floating-zone	Ar				m	P21/n	5.4165	5.5392	7.7152		89.927		57.8699
Ca2FeMoO6	Ca	Fe	Mo	O	s	d	d	1.34	0.78	0.59	0.685	0.19	0.929243	0.908895	2	2	6	4	Ca2	Fe2	Mo6	0	6	0	11.8717	16.1992	68.827	1	1.83	2.16	ss	vacuum	1100			o		5.53	5.42	7.73				57.922			rs?
Ca2FeMoO6	Ca	Fe	Mo	O	s	d	d	1.34	0.78	0.59	0.685	0.19	0.929243	0.908895	2	2	6	4	Ca2	Fe2	Mo6	0	6	0	11.8717	16.1992	68.827	1	1.83	2.16	ss	H2/Ar	1150			m		5.426	7.72	5.536		90.01		57.974			rs
Ca2FeMoO6	Ca	Fe	Mo	O	s	d	d	1.34	0.78	0.59	0.685	0.19	0.929243	0.908895	2	2	6	4	Ca2	Fe2	Mo6	0	6	0	11.8717	16.1992	68.827	1	1.83	2.16	ss	H2/Ar	1200			m	P21/n	5.4131	5.5209	7.7065		89.95		57.5775			rs	1
Ca2FeMoO6	Ca	Fe	Mo	O	s	d	d	1.34	0.78	0.59	0.685	0.19	0.929243	0.908895	2	2	6	4	Ca2	Fe2	Mo6	0	6	0	11.8717	16.1992	68.827	1	1.83	2.16	ss	H2/Ar	1200			m	P21/n	5.4145	5.5176	7.7098		90.018		57.5827		152.7	rs
Ca2FeMoO6	Ca	Fe	Mo	O	s	d	d	1.34	0.78	0.59	0.685	0.19	0.929243	0.908895	2	2	6	4	Ca2	Fe2	Mo6	0	6	0	11.8717	16.1992	68.827	1	1.83	2.16	ss	H2/Ar	1100			m	P21/n	5.416	5.527	7.698		90.04		57.6084			rs
Ca2FeMoO6	Ca	Fe	Mo	O	s	d	d	1.34	0.78	0.59	0.685	0.19	0.929243	0.908895	2	2	6	4	Ca2	Fe2	Mo6	0	6	0	11.8717	16.1992	68.827	1	1.83	2.16	ss	vacuum	1000			o		5.53	7.73	5.42				57.922			rs		black
Ca2FeMoO6	Ca	Fe	Mo	O	s	d	d	1.34	0.78	0.59	0.685	0.19	0.929243	0.908895	2	2	6	4	Ca2	Fe2	Mo6	0	6	0	11.8717	16.1992	68.827	1	1.83	2.16																	rs?
Ca2FeMoO6	Ca	Fe	Mo	O	s	d	d	1.34	0.78	0.59	0.685	0.19	0.929243	0.908895	2	2	6	4	Ca2	Fe2	Mo6	0	6	0	11.8717	16.1992	68.827	1	1.83	2.16	ss	vacuum	1150														rs	0.92
Ca2FeNbO6	Ca	Fe	Nb	O	s	d	d	1.34	0.645	0.64	0.6425	0.005	0.948579	0.927807	2	3	5	2	Ca2	Fe3	Nb5	0	5	0	11.8717	30.651	50.5728	1	1.83	1.6	ss	air	1200			o	Pbnm	5.5482	5.4454	7.7553				58.5761			d	0
Ca2FeNbO6	Ca	Fe	Nb	O	s	d	d	1.34	0.645	0.64	0.6425	0.005	0.948579	0.927807	2	3	5	2	Ca2	Fe3	Nb5	0	5	0	11.8717	30.651	50.5728	1	1.83	1.6	flux		1350			o	Pbnm	5.444	5.559	7.754				58.6652			d	0
Ca2FeNbO6	Ca	Fe	Nb	O	s	d	d	1.34	0.645	0.64	0.6425	0.005	0.948579	0.927807	2	3	5	2	Ca2	Fe3	Nb5	0	5	0	11.8717	30.651	50.5728	1	1.83	1.6	ss	air	1300			m	P21/n	5.448	5.5517	7.7612		90.11		58.6855			rs	0.32
Ca2FeNbO6	Ca	Fe	Nb	O	s	d	d	1.34	0.645	0.64	0.6425	0.005	0.948579	0.927807	2	3	5	2	Ca2	Fe3	Nb5	0	5	0	11.8717	30.651	50.5728	1	1.83	1.6	ss	air	1400			m		3.89	3.88	3.89		91.0333		58.703			d	0
Ca2FeReO6	Ca	Fe	Re	O	s	d	d	1.34	0.645	0.58	0.6125	0.065	0.962719	0.941638	2	3	5	2	Ca2	Fe3	Re5	0	5	2	11.8717	30.651	51.9	1	1.83	1.9	ss	vacuum	950			m	P21/n	5.4019	5.5246	7.6847		90.02		57.3343		156.3	rs	0.95
Ca2FeReO6	Ca	Fe	Re	O	s	d	d	1.34	0.645	0.58	0.6125	0.065	0.962719	0.941638	2	3	5	2	Ca2	Fe3	Re5	0	5	2	11.8717	30.651	51.9	1	1.83	1.9	ss	vacuum	1100			o	Pmm2	5.51	5.4	7.7				57.2765			rs	0.95
Ca2FeReO6	Ca	Fe	Re	O	s	d	d	1.34	0.645	0.58	0.6125	0.065	0.962719	0.941638	2	3	5	2	Ca2	Fe3	Re5	0	5	2	11.8717	30.651	51.9	1	1.83	1.9	ss	Ar/vacuum	1400			m	P21/n	5.40078	5.52525	7.6839		90.0695		57.3231		152.303	rs	1
Ca2FeReO6	Ca	Fe	Re	O	s	d	d	1.34	0.645	0.58	0.6125	0.065	0.962719	0.941638	2	3	5	2	Ca2	Fe3	Re5	0	5	2	11.8717	30.651	51.9	1	1.83	1.9	ss	vacuum	960			m	P21/n	5.396	5.522	7.688		90.4		57.2679			rs
Ca2FeReO6	Ca	Fe	Re	O	s	d	d	1.34	0.645	0.58	0.6125	0.065	0.962719	0.941638	2	3	5	2	Ca2	Fe3	Re5	0	5	2	11.8717	30.651	51.9	1	1.83	1.9	ss	vacuum	900			m	P21/n	5.404	5.529	7.686				57.412			rs
Ca2FeReO6	Ca	Fe	Re	O	s	d	d	1.34	0.645	0.58	0.6125	0.065	0.962719	0.941638	2	3	5	2	Ca2	Fe3	Re5	0	5	2	11.8717	30.651	51.9	1	1.83	1.9	ss	Ar	1000			m	P21/n	7.65	7.81	7.69		?		57.5			rs
Ca2FeReO6	Ca	Fe	Re	O	s	d	d	1.34	0.645	0.58	0.6125	0.065	0.962719	0.941638	2	3	5	2	Ca2	Fe3	Re5	0	5	2	11.8717	30.651	51.9	1	1.83	1.9	ss	vacuum	900			m	P21/n	5.415	5.54	7.70746		90.05		57.8042			rs?		black
Ca2FeReO6	Ca	Fe	Re	O	s	d	d	1.34	0.645	0.58	0.6125	0.065	0.962719	0.941638	2	3	5	2	Ca2	Fe3	Re5	0	5	2	11.8717	30.651	51.9	1	1.83	1.9	ss	vacuum	960														rs?
Ca2FeReO6	Ca	Fe	Re	O	s	d	d	1.34	0.645	0.58	0.6125	0.065	0.962719	0.941638	2	3	5	2	Ca2	Fe3	Re5	0	5	2	11.8717	30.651	51.9	1	1.83	1.9						m	P21/n	5.3992	5.5269	7.6826		90		57.3138			rs	0.96
Ca2FeReO6	Ca	Fe	Re	O	s	d	d	1.34	0.645	0.58	0.6125	0.065	0.962719	0.941638	2	3	5	2	Ca2	Fe3	Re5	0	5	2	11.8717	30.651	51.9	1	1.83	1.9	ss	Ar	1300			m	P21/n	5.40078	5.52525	7.6839		90.0695		57.3231		152.303	rs	<1
Ca2FeReO6	Ca	Fe	Re	O	s	d	d	1.34	0.645	0.58	0.6125	0.065	0.962719	0.941638	2	3	5	2	Ca2	Fe3	Re5	0	5	2	11.8717	30.651	51.9	1	1.83	1.9						m	P21/n	5.401	5.525	7.684		90.07		57.3236			rs	0.97
Ca2FeReO6	Ca	Fe	Re	O	s	d	d	1.34	0.645	0.58	0.6125	0.065	0.962719	0.941638	2	3	5	2	Ca2	Fe3	Re5	0	5	2	11.8717	30.651	51.9	1	1.83	1.9	ss	vacuum	1000			o		5.41	5.53	7.69				57.516			rs		black-blue
Ca2FeReO6	Ca	Fe	Re	O	s	d	d	1.34	0.645	0.58	0.6125	0.065	0.962719	0.941638	2	3	5	2	Ca2	Fe3	Re5	0	5	2	11.8717	30.651	51.9	1	1.83	1.9	ss	ampoule	1000			o		5.41	7.69	5.53				57.516			rs
Ca2FeReO6	Ca	Fe	Re	O	s	d	d	1.34	0.645	0.58	0.6125	0.065	0.962719	0.941638	2	3	5	2	Ca2	Fe3	Re5	0	5	2	11.8717	30.651	51.9	1	1.83	1.9						o		5.41	7.69	5.53				57.516			rs?
Ca2FeReO6	Ca	Fe	Re	O	s	d	d	1.34	0.645	0.58	0.6125	0.065	0.962719	0.941638	2	3	5	2	Ca2	Fe3	Re5	0	5	2	11.8717	30.651	51.9	1	1.83	1.9	ss																rs	1
Ca2FeSbO6	Ca	Fe	Sb	O	s	d	p	1.34	0.645	0.6	0.6225	0.045	0.957959	0.936982	2	3	5	2	Ca2	Fe3	Sb5	0	5	10	11.8717	30.651	55	1	1.83	2.05			1400			~c		3.87						57.9606
Ca2FeSbO6	Ca	Fe	Sb	O	s	d	p	1.34	0.645	0.6	0.6225	0.045	0.957959	0.936982	2	3	5	2	Ca2	Fe3	Sb5	0	5	10	11.8717	30.651	55	1	1.83	2.05	ss	O2	1000			m	P21/n	5.4371	5.5259	7.734		89.97		58.0917			rs	1
Ca2FeSbO6	Ca	Fe	Sb	O	s	d	p	1.34	0.645	0.6	0.6225	0.045	0.957959	0.936982	2	3	5	2	Ca2	Fe3	Sb5	0	5	10	11.8717	30.651	55	1	1.83	2.05	ss	air	1050			m	P21/n	5.5283	5.4389	7.7358		90		58.1498			rs	0.9
Ca2FeSbO6	Ca	Fe	Sb	O	s	d	p	1.34	0.645	0.6	0.6225	0.045	0.957959	0.936982	2	3	5	2	Ca2	Fe3	Sb5	0	5	10	11.8717	30.651	55	1	1.83	2.05	ss	air	1150			o	Pbnm	5.4439	5.5301	7.7433				58.2786		151.98	d	0
Ca2FeSbO6	Ca	Fe	Sb	O	s	d	p	1.34	0.645	0.6	0.6225	0.045	0.957959	0.936982	2	3	5	2	Ca2	Fe3	Sb5	0	5	10	11.8717	30.651	55	1	1.83	2.05	ss	air	1500			m	P21/n	5.4389	5.538	7.7403		89.94		58.2856			rs	0.86
Ca2FeSbO6	Ca	Fe	Sb	O	s	d	p	1.34	0.645	0.6	0.6225	0.045	0.957959	0.936982	2	3	5	2	Ca2	Fe3	Sb5	0	5	10	11.8717	30.651	55	1	1.83	2.05	ss	air/O2	1300			o		5.54	5.47	7.74				58.6379			rs
Ca2FeSbO6	Ca	Fe	Sb	O	s	d	p	1.34	0.645	0.6	0.6225	0.045	0.957959	0.936982	2	3	5	2	Ca2	Fe3	Sb5	0	5	10	11.8717	30.651	55	1	1.83	2.05
Ca2FeTaO6	Ca	Fe	Ta	O	s	d	d	1.34	0.645	0.64	0.6425	0.005	0.948579	0.927807	2	3	5	2	Ca2	Fe3	Ta5	0	5	0	11.8717	30.651	48.272	1	1.83	1.5	ss	air	1400			m		3.89	3.88	3.89		91.1167		58.7014			d	0
Ca2FeTaO6	Ca	Fe	Ta	O	s	d	d	1.34	0.645	0.64	0.6425	0.005	0.948579	0.927807	2	3	5	2	Ca2	Fe3	Ta5	0	5	0	11.8717	30.651	48.272	1	1.83	1.5	ss	air	1200			o	Pbnm	5.5508	5.4505	7.7626				58.7137			d	0
Ca2FeWO6	Ca	Fe	W	O	s	d	d	1.34	0.78	0.6	0.69	0.18	0.92702	0.906721	2	2	6	4	Ca2	Fe2	W6	0	6	0	11.8717	16.1992	64.77	1	1.83	2.36	ss		1200			o	Pmm2	7.7051	5.4242	5.5108				57.5796
Ca2GaNbO6	Ca	Ga	Nb	O	s	p	d	1.34	0.62	0.64	0.63	0.02	0.95442	0.93352	2	3	5	2	Ca2	Ga3	Nb5	0	10	0	11.8717	30.7258	50.5728	1	1.81	1.6			1400			o		5.414	5.501	7.709				57.3982
Ca2GaNbO6	Ca	Ga	Nb	O	s	p	d	1.34	0.62	0.64	0.63	0.02	0.95442	0.93352	2	3	5	2	Ca2	Ga3	Nb5	0	10	0	11.8717	30.7258	50.5728	1	1.81	1.6	ss	air	1400			o		5.441	5.498	7.724				57.7651
Ca2GaTaO6	Ca	Ga	Ta	O	s	p	d	1.34	0.62	0.64	0.63	0.02	0.95442	0.93352	2	3	5	2	Ca2	Ga3	Ta5	0	10	0	11.8717	30.7258	48.272	1	1.81	1.5						m	P21/n	5.43228	5.51024	7.72365		89.99		57.7983			rs	0.48
Ca2GaTaO6	Ca	Ga	Ta	O	s	p	d	1.34	0.62	0.64	0.63	0.02	0.95442	0.93352	2	3	5	2	Ca2	Ga3	Ta5	0	10	0	11.8717	30.7258	48.272	1	1.81	1.5	ss	air	1350			m	P21/n	5.43228	5.51024	7.72365		89.99		57.7983		154.433	rs	0.48
Ca2GaTaO6	Ca	Ga	Ta	O	s	p	d	1.34	0.62	0.64	0.63	0.02	0.95442	0.93352	2	3	5	2	Ca2	Ga3	Ta5	0	10	0	11.8717	30.7258	48.272	1	1.81	1.5	ss	air	1400			o		5.437	5.527	7.73				58.0722
Ca2GaTaO6	Ca	Ga	Ta	O	s	p	d	1.34	0.62	0.64	0.63	0.02	0.95442	0.93352	2	3	5	2	Ca2	Ga3	Ta5	0	10	0	11.8717	30.7258	48.272	1	1.81	1.5			1300			o		5.543	5.493	7.704				58.6423
Ca2GdNbO6	Ca	Gd	Nb	O	s	f	d	1.34	0.938	0.64	0.789	0.298	0.885095	0.865713	2	3	5	2	Ca2	Gd3	Nb5	0		0	11.8717	20.63	50.5728	1	1.2	1.6			1400			o		5.568	5.845	8.065				65.6188
Ca2GdNbO6	Ca	Gd	Nb	O	s	f	d	1.34	0.938	0.64	0.789	0.298	0.885095	0.865713	2	3	5	2	Ca2	Gd3	Nb5	0		0	11.8717	20.63	50.5728	1	1.2	1.6	ss	air	1400			m		5.57	5.84	8.08		90.2		65.7078			rs
Ca2GdNbO6	Ca	Gd	Nb	O	s	f	d	1.34	0.938	0.64	0.789	0.298	0.885095	0.865713	2	3	5	2	Ca2	Gd3	Nb5	0		0	11.8717	20.63	50.5728	1	1.2	1.6	flux		1350			m	P21/n	5.572	5.853	8.085		90.25		65.9182			rs
Ca2GdRuO6	Ca	Gd	Ru	O	s	f	d	1.34	0.938	0.565	0.7515	0.373	0.900522	0.880802	2	3	5	2	Ca2	Gd3	Ru5	0		3	11.8717	20.63	59	1	1.2	2.2	ss	air	1200			m	P21/n	5.52	5.64	8.24487		90.05		64.1714			rs	1
Ca2GdRuO6	Ca	Gd	Ru	O	s	f	d	1.34	0.938	0.565	0.7515	0.373	0.900522	0.880802	2	3	5	2	Ca2	Gd3	Ru5	0		3	11.8717	20.63	59	1	1.2	2.2	ss
Ca2GdRuO6	Ca	Gd	Ru	O	s	f	d	1.34	0.938	0.565	0.7515	0.373	0.900522	0.880802	2	3	5	2	Ca2	Gd3	Ru5	0		3	11.8717	20.63	59	1	1.2	2.2	ss	O2/Ar	1380
Ca2GdSbO6	Ca	Gd	Sb	O	s	f	p	1.34	0.938	0.6	0.769	0.338	0.893256	0.873696	2	3	5	2	Ca2	Gd3	Sb5	0		10	11.8717	20.63	55	1	1.2	2.05			1300			o		5.577	5.838	8.065				65.6461
Ca2GdSbO6	Ca	Gd	Sb	O	s	f	p	1.34	0.938	0.6	0.769	0.338	0.893256	0.873696	2	3	5	2	Ca2	Gd3	Sb5	0		10	11.8717	20.63	55	1	1.2	2.05			1400			m		4.056	4.051	4.056		92.5		66.5801
Ca2GdTaO6	Ca	Gd	Ta	O	s	f	d	1.34	0.938	0.64	0.789	0.298	0.885095	0.865713	2	3	5	2	Ca2	Gd3	Ta5	0		0	11.8717	20.63	48.272	1	1.2	1.5			1300			o		5.575	5.842	8.065				65.6675
Ca2GdTaO6	Ca	Gd	Ta	O	s	f	d	1.34	0.938	0.64	0.789	0.298	0.885095	0.865713	2	3	5	2	Ca2	Gd3	Ta5	0		0	11.8717	20.63	48.272	1	1.2	1.5	ss	air	1400			m		5.57	5.84	8.08		90.2		65.7078			rs
Ca2GdTaO6	Ca	Gd	Ta	O	s	f	d	1.34	0.938	0.64	0.789	0.298	0.885095	0.865713	2	3	5	2	Ca2	Gd3	Ta5	0		0	11.8717	20.63	48.272	1	1.2	1.5	flux		1450			m	P21/n	5.576	5.848	8.084		90.3		65.9008
Ca2HoNbO6	Ca	Ho	Nb	O	s	f	d	1.34	0.901	0.64	0.7705	0.261	0.892639	0.873092	2	3	5	2	Ca2	Ho3	Nb5	0		0	11.8717	22.84	50.5728	1	1.23	1.6			1400			o		5.577	5.79	8.039				64.8965
Ca2HoNbO6	Ca	Ho	Nb	O	s	f	d	1.34	0.901	0.64	0.7705	0.261	0.892639	0.873092	2	3	5	2	Ca2	Ho3	Nb5	0		0	11.8717	22.84	50.5728	1	1.23	1.6	flux		1350			m	P21/n	5.576	5.811	8.05		90		65.2093			rs
Ca2HoNbO6	Ca	Ho	Nb	O	s	f	d	1.34	0.901	0.64	0.7705	0.261	0.892639	0.873092	2	3	5	2	Ca2	Ho3	Nb5	0		0	11.8717	22.84	50.5728	1	1.23	1.6	ss	air	1400			o		5.58	5.81	8.05				65.2448			rs
Ca2HoRuO6	Ca	Ho	Ru	O	s	f	d	1.34	0.901	0.565	0.733	0.336	0.908332	0.888442	2	3	5	2	Ca2	Ho3	Ru5	0		3	11.8717	22.84	59	1	1.23	2.2	ss	air	1100			m	P21/n	5.4991	5.7725	7.9381		90.18		62.9956			rs	1
Ca2HoRuO6	Ca	Ho	Ru	O	s	f	d	1.34	0.901	0.565	0.733	0.336	0.908332	0.888442	2	3	5	2	Ca2	Ho3	Ru5	0		3	11.8717	22.84	59	1	1.23	2.2	ss	air	1200			m	P21/n	5.51	5.63	8.17415		90.2		63.3928			rs	1
Ca2HoRuO6	Ca	Ho	Ru	O	s	f	d	1.34	0.901	0.565	0.733	0.336	0.908332	0.888442	2	3	5	2	Ca2	Ho3	Ru5	0		3	11.8717	22.84	59	1	1.23	2.2	ss
Ca2HoSbO6	Ca	Ho	Sb	O	s	f	p	1.34	0.901	0.6	0.7505	0.301	0.900941	0.881212	2	3	5	2	Ca2	Ho3	Sb5	0		10	11.8717	22.84	55	1	1.23	2.05			1300			o		5.578	5.8	8.042				65.0445
Ca2HoSbO6	Ca	Ho	Sb	O	s	f	p	1.34	0.901	0.6	0.7505	0.301	0.900941	0.881212	2	3	5	2	Ca2	Ho3	Sb5	0		10	11.8717	22.84	55	1	1.23	2.05			1400			m		4.048	4.045	4.048		92.25		66.2315
Ca2HoTaO6	Ca	Ho	Ta	O	s	f	d	1.34	0.901	0.64	0.7705	0.261	0.892639	0.873092	2	3	5	2	Ca2	Ho3	Ta5	0		0	11.8717	22.84	48.272	1	1.23	1.5			1300			o		5.577	5.808	8.043				65.1306
Ca2HoTaO6	Ca	Ho	Ta	O	s	f	d	1.34	0.901	0.64	0.7705	0.261	0.892639	0.873092	2	3	5	2	Ca2	Ho3	Ta5	0		0	11.8717	22.84	48.272	1	1.23	1.5	ss	air	1400			o		5.58	5.81	8.05				65.2448			rs
Ca2HoTaO6	Ca	Ho	Ta	O	s	f	d	1.34	0.901	0.64	0.7705	0.261	0.892639	0.873092	2	3	5	2	Ca2	Ho3	Ta5	0		0	11.8717	22.84	48.272	1	1.23	1.5	flux		1450			m	P21/n	5.585	5.817	8.06		90		65.4632
Ca2InNbO6	Ca	In	Nb	O	s	p	d	1.34	0.8	0.64	0.72	0.16	0.913902	0.89389	2	3	5	2	Ca2	In3	Nb5	0	10	0	11.8717	28.0441	50.5728	1	1.78	1.6			1400			o		5.523	5.687	7.925				62.2297
Ca2InNbO6	Ca	In	Nb	O	s	p	d	1.34	0.8	0.64	0.72	0.16	0.913902	0.89389	2	3	5	2	Ca2	In3	Nb5	0	10	0	11.8717	28.0441	50.5728	1	1.78	1.6	ss	air	1400			o		5.53	5.71	7.91				62.4421			rs
Ca2InNbO6	Ca	In	Nb	O	s	p	d	1.34	0.8	0.64	0.72	0.16	0.913902	0.89389	2	3	5	2	Ca2	In3	Nb5	0	10	0	11.8717	28.0441	50.5728	1	1.78	1.6	ss	air	1230			o	Pnma	5.532	5.715	7.918				62.5826			d	0
Ca2InNbO6	Ca	In	Nb	O	s	p	d	1.34	0.8	0.64	0.72	0.16	0.913902	0.89389	2	3	5	2	Ca2	In3	Nb5	0	10	0	11.8717	28.0441	50.5728	1	1.78	1.6	ss	air	1230			m	P21/n	5.5284	5.7109	7.929		90		62.5839			rs/d?
Ca2InNbO6	Ca	In	Nb	O	s	p	d	1.34	0.8	0.64	0.72	0.16	0.913902	0.89389	2	3	5	2	Ca2	In3	Nb5	0	10	0	11.8717	28.0441	50.5728	1	1.78	1.6	ss	air	1230														rs
Ca2InSbO6	Ca	In	Sb	O	s	p	p	1.34	0.8	0.6	0.7	0.2	0.922606	0.902403	2	3	5	2	Ca2	In3	Sb5	0	10	10	11.8717	28.0441	55	1	1.78	2.05			1300			o		5.515	5.669	7.892				61.6849
Ca2InSbO6	Ca	In	Sb	O	s	p	p	1.34	0.8	0.6	0.7	0.2	0.922606	0.902403	2	3	5	2	Ca2	In3	Sb5	0	10	10	11.8717	28.0441	55	1	1.78	2.05	ss	air	1300			m	P21/n	5.5273	5.6937	7.9049		89.92		62.1933		145.167	rs	0.78
Ca2InSbO6	Ca	In	Sb	O	s	p	p	1.34	0.8	0.6	0.7	0.2	0.922606	0.902403	2	3	5	2	Ca2	In3	Sb5	0	10	10	11.8717	28.0441	55	1	1.78	2.05			1400			m		3.968	3.967	3.968		91.5		62.4391
Ca2InTaO6	Ca	In	Ta	O	s	p	d	1.34	0.8	0.64	0.72	0.16	0.913902	0.89389	2	3	5	2	Ca2	In3	Ta5	0	10	0	11.8717	28.0441	48.272	1	1.78	1.5						m	P21/n	5.52884	5.70805	7.92248		90.097		62.5061			rs	1
Ca2InTaO6	Ca	In	Ta	O	s	p	d	1.34	0.8	0.64	0.72	0.16	0.913902	0.89389	2	3	5	2	Ca2	In3	Ta5	0	10	0	11.8717	28.0441	48.272	1	1.78	1.5	ss	air	1450			m	P21/n	5.52884	5.70805	7.92248		90.097		62.5061		148.3	rs	1
Ca2InTaO6	Ca	In	Ta	O	s	p	d	1.34	0.8	0.64	0.72	0.16	0.913902	0.89389	2	3	5	2	Ca2	In3	Ta5	0	10	0	11.8717	28.0441	48.272	1	1.78	1.5	ss	air	1400			o		5.53	5.71	7.92				62.5211			rs
Ca2InTaO6	Ca	In	Ta	O	s	p	d	1.34	0.8	0.64	0.72	0.16	0.913902	0.89389	2	3	5	2	Ca2	In3	Ta5	0	10	0	11.8717	28.0441	48.272	1	1.78	1.5			1300			o		5.537	5.697	7.938				62.5996
Ca2LaNbO6	Ca	La	Nb	O	s	d	d	1.34	1.032	0.64	0.836	0.392	0.86649	0.847516	2	3	5	2	Ca2	La3	Nb5	0	0	0	11.8717	19.1773	50.5728	1	1.1	1.6	ss	air	1400			o		5.65	5.86	8.14				67.3768			rs
Ca2LaNbO6	Ca	La	Nb	O	s	d	d	1.34	1.032	0.64	0.836	0.392	0.86649	0.847516	2	3	5	2	Ca2	La3	Nb5	0	0	0	11.8717	19.1773	50.5728	1	1.1	1.6			1400			o		5.666	5.877	8.155				67.8885
Ca2LaNbO6	Ca	La	Nb	O	s	d	d	1.34	1.032	0.64	0.836	0.392	0.86649	0.847516	2	3	5	2	Ca2	La3	Nb5	0	0	0	11.8717	19.1773	50.5728	1	1.1	1.6	ss		1350			m	P21/n	5.673	5.895	8.168		90		68.2892			rs
Ca2LaRuO6	Ca	La	Ru	O	s	d	d	1.34	1.032	0.565	0.7985	0.467	0.88127	0.861972	2	3	5	2	Ca2	La3	Ru5	0	0	3	11.8717	19.1773	59	1	1.1	2.2	ss	air	1200			o		5.817	5.6	8.038				65.4599			rs
Ca2LaRuO6	Ca	La	Ru	O	s	d	d	1.34	1.032	0.565	0.7985	0.467	0.88127	0.861972	2	3	5	2	Ca2	La3	Ru5	0	0	3	11.8717	19.1773	59	1	1.1	2.2	ss	air	1200			tr	P-1	5.6179	5.835	8.0667	90	89.76	90	66.1069			rs	1
Ca2LaRuO6	Ca	La	Ru	O	s	d	d	1.34	1.032	0.565	0.7985	0.467	0.88127	0.861972	2	3	5	2	Ca2	La3	Ru5	0	0	3	11.8717	19.1773	59	1	1.1	2.2						m	P21/n	5.618	5.8366	8.0677		90.24		66.1344			rs
Ca2LaRuO6	Ca	La	Ru	O	s	d	d	1.34	1.032	0.565	0.7985	0.467	0.88127	0.861972	2	3	5	2	Ca2	La3	Ru5	0	0	3	11.8717	19.1773	59	1	1.1	2.2	ss	air	1200			m	P21/n	5.63	5.71	8.24487		90.25		66.2619			rs	1
Ca2LaRuO6	Ca	La	Ru	O	s	d	d	1.34	1.032	0.565	0.7985	0.467	0.88127	0.861972	2	3	5	2	Ca2	La3	Ru5	0	0	3	11.8717	19.1773	59	1	1.1	2.2	ss
Ca2LaSbO6	Ca	La	Sb	O	s	d	p	1.34	1.032	0.6	0.816	0.432	0.874311	0.855165	2	3	5	2	Ca2	La3	Sb5	0	0	10	11.8717	19.1773	55	1	1.1	2.05			1300			o		5.679	5.872	8.162				68.0447
Ca2LaSbO6	Ca	La	Sb	O	s	d	p	1.34	1.032	0.6	0.816	0.432	0.874311	0.855165	2	3	5	2	Ca2	La3	Sb5	0	0	10	11.8717	19.1773	55	1	1.1	2.05			1400			m		4.087	4.085	4.087		91.78		68.2012
Ca2LaTaO6	Ca	La	Ta	O	s	d	d	1.34	1.032	0.64	0.836	0.392	0.86649	0.847516	2	3	5	2	Ca2	La3	Ta5	0	0	0	11.8717	19.1773	48.272	1	1.1	1.5	ss	air	1400			o		5.65	5.89	8.14				67.7217			rs
Ca2LaTaO6	Ca	La	Ta	O	s	d	d	1.34	1.032	0.64	0.836	0.392	0.86649	0.847516	2	3	5	2	Ca2	La3	Ta5	0	0	0	11.8717	19.1773	48.272	1	1.1	1.5			1300			o		5.669	5.888	8.168				68.1601
Ca2LaTaO6	Ca	La	Ta	O	s	d	d	1.34	1.032	0.64	0.836	0.392	0.86649	0.847516	2	3	5	2	Ca2	La3	Ta5	0	0	0	11.8717	19.1773	48.272	1	1.1	1.5	flux		1450			m	P21/n	5.672	5.89	8.166		90.09		68.2025
Ca2LiOsO6	Ca	Li	Os	O	s	s	d	1.34	0.76	0.525	0.6425	0.235	0.948579	0.927807	2	1	7	6	Ca2	Li1	Os7	0		1	11.8717	5.39171	85.1	1	0.98	2.2	ss	air	600			c		7.83						60.0061			rs
Ca2LiReO6	Ca	Li	Re	O	s	s	d	1.34	0.76	0.53	0.645	0.23	0.947419	0.926673	2	1	7	6	Ca2	Li1	Re7	0		0	11.8717	5.39171	82.71	1	0.98	1.9	ss	air	600			c		7.83						60.0061			rs
Ca2LuNbO6	Ca	Lu	Nb	O	s	f	d	1.34	0.861	0.64	0.7505	0.221	0.900941	0.881212	2	3	5	2	Ca2	Lu3	Nb5	0	0	0	11.8717	20.959	50.5728	1	1.27	1.6			1400			o		5.563	5.751	7.991				63.9136
Ca2LuNbO6	Ca	Lu	Nb	O	s	f	d	1.34	0.861	0.64	0.7505	0.221	0.900941	0.881212	2	3	5	2	Ca2	Lu3	Nb5	0	0	0	11.8717	20.959	50.5728	1	1.27	1.6	flux		1350			m	P21/n	5.569	5.767	8		90.05		64.2328			rs
Ca2LuNbO6	Ca	Lu	Nb	O	s	f	d	1.34	0.861	0.64	0.7505	0.221	0.900941	0.881212	2	3	5	2	Ca2	Lu3	Nb5	0	0	0	11.8717	20.959	50.5728	1	1.27	1.6	ss		1400			m		4.016	4	4.016		91.8		64.4812
Ca2LuRuO6	Ca	Lu	Ru	O	s	f	d	1.34	0.861	0.565	0.713	0.296	0.91693	0.896851	2	3	5	2	Ca2	Lu3	Ru5	0	0	3	11.8717	20.959	59	1	1.27	2.2	ss	air	1200			m	P21/n	5.52	5.6	8.06102		90.2		62.2952			rs	1
Ca2LuRuO6	Ca	Lu	Ru	O	s	f	d	1.34	0.861	0.565	0.713	0.296	0.91693	0.896851	2	3	5	2	Ca2	Lu3	Ru5	0	0	3	11.8717	20.959	59	1	1.27	2.2	ss
Ca2LuSbO6	Ca	Lu	Sb	O	s	f	p	1.34	0.861	0.6	0.7305	0.261	0.909398	0.889484	2	3	5	2	Ca2	Lu3	Sb5	0	0	10	11.8717	20.959	55	1	1.27	2.05			1300			o		5.564	5.745	7.992				63.8664
Ca2LuSbO6	Ca	Lu	Sb	O	s	f	p	1.34	0.861	0.6	0.7305	0.261	0.909398	0.889484	2	3	5	2	Ca2	Lu3	Sb5	0	0	10	11.8717	20.959	55	1	1.27	2.05			1400			m		4.007	3.999	4.007		91.68		64.1805
Ca2LuTaO6	Ca	Lu	Ta	O	s	f	d	1.34	0.861	0.64	0.7505	0.221	0.900941	0.881212	2	3	5	2	Ca2	Lu3	Ta5	0	0	0	11.8717	20.959	48.272	1	1.27	1.5			1300			o		5.565	5.753	7.997				64.0069
Ca2LuTaO6	Ca	Lu	Ta	O	s	f	d	1.34	0.861	0.64	0.7505	0.221	0.900941	0.881212	2	3	5	2	Ca2	Lu3	Ta5	0	0	0	11.8717	20.959	48.272	1	1.27	1.5	ss		1400			m	P21/n	5.573	5.765	8.011		90.01		64.345
Ca2MgMoO6	Ca	Mg	Mo	O	s	s	d	1.34	0.72	0.59	0.655	0.13	0.942809	0.922164	2	2	6	4	Ca2	Mg2	Mo6	0		0	11.8717	15.0353	68.827	1	1.31	2.16	ss		1250			o	Pmm2	5.53	5.403	7.72				57.6657
Ca2MgReO6	Ca	Mg	Re	O	s	s	d	1.34	0.72	0.55	0.635	0.17	0.952075	0.931227	2	2	6	4	Ca2	Mg2	Re6	0		1	11.8717	15.0353	67	1	1.31	1.9	ss	vacuum	850			m	P21/n	5.4132	5.54174	7.70415		90.07		57.7783			rs
Ca2MgReO6	Ca	Mg	Re	O	s	s	d	1.34	0.72	0.55	0.635	0.17	0.952075	0.931227	2	2	6	4	Ca2	Mg2	Re6	0		1	11.8717	15.0353	67	1	1.31	1.9		vacuum	1000			o		5.48	7.77	5.56				59.1856			rs
Ca2MgTeO6	Ca	Mg	Te	O	s	s	p	1.34	0.72	0.56	0.64	0.16	0.949741	0.928944	2	2	6	4	Ca2	Mg2	Te6	0		10	11.8717	15.0353	69.1	1	1.31	2.1			1200			m		3.86	3.84	3.86		91		57.2057			rs?
Ca2MgTeO6	Ca	Mg	Te	O	s	s	p	1.34	0.72	0.56	0.64	0.16	0.949741	0.928944	2	2	6	4	Ca2	Mg2	Te6	0		10	11.8717	15.0353	69.1	1	1.31	2.1	ss					m											rs?
Ca2MgWO6	Ca	Mg	W	O	s	s	d	1.34	0.72	0.6	0.66	0.12	0.940521	0.919925	2	2	6	4	Ca2	Mg2	W6	0		0	11.8717	15.0353	64.77	1	1.31	2.36						m	P21/n	5.4199	5.5479	7.7147		90.092		57.9934			rs
Ca2MgWO6	Ca	Mg	W	O	s	s	d	1.34	0.72	0.6	0.66	0.12	0.940521	0.919925	2	2	6	4	Ca2	Mg2	W6	0		0	11.8717	15.0353	64.77	1	1.31	2.36						m	P21/n	5.42325	5.54915	7.7191		89.918		58.0754			rs
Ca2MgWO6	Ca	Mg	W	O	s	s	d	1.34	0.72	0.6	0.66	0.12	0.940521	0.919925	2	2	6	4	Ca2	Mg2	W6	0		0	11.8717	15.0353	64.77	1	1.31	2.36	ss	air	1200			m	P21/n	5.42548	5.55103	7.72236		89.916		58.1435		152.467	rs		white
Ca2MnIrO6	Ca	Mn	Ir	O	s	d	d	1.34	0.645	0.57	0.6075	0.075	0.965117	0.943983	2	3	5	2	Ca2	Mn3	Ir5	0	4	4	11.8717	33.668	57	1	1.55	2.2	ss	air	1200			o	Pbnm	5.35	5.45	7.61				55.4721			d?
Ca2MnMoO6	Ca	Mn	Mo	O	s	d	d	1.34	0.83	0.59	0.71	0.24	0.918233	0.898126	2	2	6	4	Ca2	Mn2	Mo6	0	5	0	11.8717	15.64	68.827	1	1.55	2.16	floating-zone	Ar				m	P21/n	5.4145	5.5149	7.7818		89.913		58.0919
Ca2MnNbO6	Ca	Mn	Nb	O	s	d	d	1.34	0.645	0.64	0.6425	0.005	0.948579	0.927807	2	3	5	2	Ca2	Mn3	Nb5	0	4	0	11.8717	33.668	50.5728	1	1.55	1.6	ss		1400			o	Pbnm	5.4527	5.5622	7.7062				58.4304			d	0
Ca2MnNbO6	Ca	Mn	Nb	O	s	d	d	1.34	0.645	0.64	0.6425	0.005	0.948579	0.927807	2	3	5	2	Ca2	Mn3	Nb5	0	4	0	11.8717	33.668	50.5728	1	1.55	1.6	ss	air	1385			o	Pnma	5.5635	7.6996	5.453				58.3972		152.367	d	0	black
Ca2MnNbO6	Ca	Mn	Nb	O	s	d	d	1.34	0.645	0.64	0.6425	0.005	0.948579	0.927807	2	3	5	2	Ca2	Mn3	Nb5	0	4	0	11.8717	33.668	50.5728	1	1.55	1.6	ss		1400			?		3.98						63.0448
Ca2MnReO6	Ca	Mn	Re	O	s	d	d	1.34	0.83	0.55	0.69	0.28	0.92702	0.906721	2	2	6	4	Ca2	Mn2	Re6	0	5	1	11.8717	15.64	67	1	1.55	1.9	ss	Ar/vacuum	1400			m	P21/n	5.44651	5.63997	7.77657		90.1775		59.7202		148.257	rs	1
Ca2MnReO6	Ca	Mn	Re	O	s	d	d	1.34	0.83	0.55	0.69	0.28	0.92702	0.906721	2	2	6	4	Ca2	Mn2	Re6	0	5	1	11.8717	15.64	67	1	1.55	1.9	ss	vacuum	985			m	P21/n	5.44445	5.63957	7.77524		90.18		59.6831		148.7	rs	0.954
Ca2MnReO6	Ca	Mn	Re	O	s	d	d	1.34	0.83	0.55	0.69	0.28	0.92702	0.906721	2	2	6	4	Ca2	Mn2	Re6	0	5	1	11.8717	15.64	67	1	1.55	1.9		vacuum	1000			o		5.52	7.82	5.55				59.8934			rs
Ca2MnRuO6	Ca	Mn	Ru	O	s	d	d	1.34	0.53	0.62	0.575	0.09	0.980999	0.959517	2	4	4	0	Ca2	Mn4	Ru4	0	3	4	11.8717	51.2	45	1	1.55	2.2	ss	air	1150			o	Pnma	5.4305	7.587	5.3403				55.0067			d	0
Ca2MnRuO6	Ca	Mn	Ru	O	s	d	d	1.34	0.53	0.62	0.575	0.09	0.980999	0.959517	2	4	4	0	Ca2	Mn4	Ru4	0	3	4	11.8717	51.2	45	1	1.55	2.2	ss	air	1300			o	Pnma										rs?
Ca2MnRuO6	Ca	Mn	Ru	O	s	d	d	1.34	0.53	0.62	0.575	0.09	0.980999	0.959517	2	4	4	0	Ca2	Mn4	Ru4	0	3	4	11.8717	51.2	45	1	1.55	2.2	ss	air	1385			o	Pnma	5.4207	7.5757	5.3346				54.7671		153.527	d	0	black
Ca2MnRuO6	Ca	Mn	Ru	O	s	d	d	1.34	0.53	0.62	0.575	0.09	0.980999	0.959517	2	4	4	0	Ca2	Mn4	Ru4	0	3	4	11.8717	51.2	45	1	1.55	2.2	ss	air	1150			o	Pbnm	5.33909	5.41953	7.57844				54.8212			d	0
Ca2MnRuO6	Ca	Mn	Ru	O	s	d	d	1.34	0.53	0.62	0.575	0.09	0.980999	0.959517	2	4	4	0	Ca2	Mn4	Ru4	0	3	4	11.8717	51.2	45	1	1.55	2.2	ss	air	1300			o	Pnma	5.407	7.607	5.341				54.9202			rs?
Ca2MnRuO6	Ca	Mn	Ru	O	s	d	d	1.34	0.53	0.62	0.575	0.09	0.980999	0.959517	2	4	4	0	Ca2	Mn4	Ru4	0	3	4	11.8717	51.2	45	1	1.55	2.2	ss	air+O2	1200			o	Pnma	5.35	5.43	7.59				55.1233			rs?
Ca2MnRuO6	Ca	Mn	Ru	O	s	d	d	1.34	0.53	0.62	0.575	0.09	0.980999	0.959517	2	4	4	0	Ca2	Mn4	Ru4	0	3	4	11.8717	51.2	45	1	1.55	2.2	ss	air	1385			o	Pnma	5.4302	7.5989	5.3492				55.1817		153.257	d	0
Ca2MnSbO6	Ca	Mn	Sb	O	s	d	p	1.34	0.645	0.6	0.6225	0.045	0.957959	0.936982	2	3	5	2	Ca2	Mn3	Sb5	0	4	10	11.8717	33.668	55	1	1.55	2.05	ss	air	1400			m	P21/m	5.4624	7.6972	5.559		90.09		58.4322			d	0
Ca2MnSbO6	Ca	Mn	Sb	O	s	d	p	1.34	0.645	0.6	0.6225	0.045	0.957959	0.936982	2	3	5	2	Ca2	Mn3	Sb5	0	4	10	11.8717	33.668	55	1	1.55	2.05	ss	air	1385			o	Pnma	5.5549	7.6941	5.4591				58.3304		151.667	d	0	black
Ca2MnSbO6	Ca	Mn	Sb	O	s	d	p	1.34	0.645	0.6	0.6225	0.045	0.957959	0.936982	2	3	5	2	Ca2	Mn3	Sb5	0	4	10	11.8717	33.668	55	1	1.55	2.05	ss	air	1350			m	P21/m	5.4607	7.6934	5.5548		90.134		58.341			d	0
Ca2MnSbO6	Ca	Mn	Sb	O	s	d	p	1.34	0.645	0.6	0.6225	0.045	0.957959	0.936982	2	3	5	2	Ca2	Mn3	Sb5	0	4	10	11.8717	33.668	55	1	1.55	2.05			1400			~c		3.88						58.4111
Ca2MnSbO6	Ca	Mn	Sb	O	s	d	p	1.34	0.645	0.6	0.6225	0.045	0.957959	0.936982	2	3	5	2	Ca2	Mn3	Sb5	0	4	10	11.8717	33.668	55	1	1.55	2.05	sol-gel	N2	1200			o	Pbnm	5.4695	5.575	7.741				59.0105		151.32	d	0
Ca2MnTaO6	Ca	Mn	Ta	O	s	d	d	1.34	0.645	0.64	0.6425	0.005	0.948579	0.927807	2	3	5	2	Ca2	Mn3	Ta5	0	4	0	11.8717	33.668	48.272	1	1.55	1.5	ss	air	1300			m	P21/m	5.46	7.72	5.5674		90.078		58.6681			d	0
Ca2MnTaO6	Ca	Mn	Ta	O	s	d	d	1.34	0.645	0.64	0.6425	0.005	0.948579	0.927807	2	3	5	2	Ca2	Mn3	Ta5	0	4	0	11.8717	33.668	48.272	1	1.55	1.5	ss	air	1400			m		3.9	3.87	3.9		91.15		58.8508			d	0
Ca2MnTeO6	Ca	Mn	Te	O	s	d	p	1.34	0.83	0.56	0.695	0.27	0.924808	0.904557	2	2	6	4	Ca2	Mn2	Te6	0	5	10	11.8717	15.64	69.1	1	1.55	2.1			1350			m		3.91	3.89	3.91		91.5		59.4503			rs?
Ca2MnTeO6	Ca	Mn	Te	O	s	d	p	1.34	0.83	0.56	0.695	0.27	0.924808	0.904557	2	2	6	4	Ca2	Mn2	Te6	0	5	10	11.8717	15.64	69.1	1	1.55	2.1	ss					m											rs?
Ca2MnWO6	Ca	Mn	W	O	s	d	d	1.34	0.83	0.6	0.715	0.23	0.916063	0.896003	2	2	6	4	Ca2	Mn2	W6	0	5	0	11.8717	15.64	64.77	1	1.55	2.36	ss	N2	1340			m	P21/n	5.4617	5.6545	7.8022		90.193		60.2389		148.205	rs	1
Ca2MnWO6	Ca	Mn	W	O	s	d	d	1.34	0.83	0.6	0.715	0.23	0.916063	0.896003	2	2	6	4	Ca2	Mn2	W6	0	5	0	11.8717	15.64	64.77	1	1.55	2.36	sol-gel	H2/N2	1050			m	P21/n	5.4694	5.6504	7.8122		90.179		60.3573		148.083	rs	1
Ca2NbBiO6	Ca	Nb	Bi	O	s	d	p	1.34	0.72	0.76	0.74	0.04	0.905361	0.885536	2	3	5	2	Ca2	Nb3	Bi5	0	2	10	11.8717	25.04	54.856	1	1.6	2.02			1400			o		5.539	5.765	7.99				63.7848
Ca2NdNbO6	Ca	Nd	Nb	O	s	f	d	1.34	0.983	0.64	0.8115	0.343	0.87609	0.856905	2	3	5	2	Ca2	Nd3	Nb5	0		0	11.8717	22.05	50.5728	1	1.14	1.6	ss	air	1400			m		5.61	5.85	8.1		90.08		66.4574			rs
Ca2NdNbO6	Ca	Nd	Nb	O	s	f	d	1.34	0.983	0.64	0.8115	0.343	0.87609	0.856905	2	3	5	2	Ca2	Nd3	Nb5	0		0	11.8717	22.05	50.5728	1	1.14	1.6			1400			o		5.608	5.859	8.1				66.536
Ca2NdNbO6	Ca	Nd	Nb	O	s	f	d	1.34	0.983	0.64	0.8115	0.343	0.87609	0.856905	2	3	5	2	Ca2	Nd3	Nb5	0		0	11.8717	22.05	50.5728	1	1.14	1.6	flux		1350			m	P21/n	5.615	5.877	8.114		90.2		66.9388			rs
Ca2NdRuO6	Ca	Nd	Ru	O	s	f	d	1.34	0.983	0.565	0.774	0.418	0.891202	0.871686	2	3	5	2	Ca2	Nd3	Ru5	0		3	11.8717	22.05	59	1	1.14	2.2	ss	air	1100			m	P21/n	5.5564	5.8296	8.0085		90.07		64.852			rs	1
Ca2NdRuO6	Ca	Nd	Ru	O	s	f	d	1.34	0.983	0.565	0.774	0.418	0.891202	0.871686	2	3	5	2	Ca2	Nd3	Ru5	0		3	11.8717	22.05	59	1	1.14	2.2	ss	air	1200			m	P21/n	5.57	5.67	8.23072		90.1		64.9854			rs	1
Ca2NdRuO6	Ca	Nd	Ru	O	s	f	d	1.34	0.983	0.565	0.774	0.418	0.891202	0.871686	2	3	5	2	Ca2	Nd3	Ru5	0		3	11.8717	22.05	59	1	1.14	2.2	ss
Ca2NdSbO6	Ca	Nd	Sb	O	s	f	p	1.34	0.983	0.6	0.7915	0.383	0.884085	0.864726	2	3	5	2	Ca2	Nd3	Sb5	0		10	11.8717	22.05	55	1	1.14	2.05			1300			o		5.62	5.85	8.106				66.6252
Ca2NdSbO6	Ca	Nd	Sb	O	s	f	p	1.34	0.983	0.6	0.7915	0.383	0.884085	0.864726	2	3	5	2	Ca2	Nd3	Sb5	0		10	11.8717	22.05	55	1	1.14	2.05			1400			m		4.085	4.082	4.085		92.33		68.0609
Ca2NdTaO6	Ca	Nd	Ta	O	s	f	d	1.34	0.983	0.64	0.8115	0.343	0.87609	0.856905	2	3	5	2	Ca2	Nd3	Ta5	0		0	11.8717	22.05	48.272	1	1.14	1.5	ss	air	1400			m		5.61	5.85	8.1		90.08		66.4574			rs
Ca2NdTaO6	Ca	Nd	Ta	O	s	f	d	1.34	0.983	0.64	0.8115	0.343	0.87609	0.856905	2	3	5	2	Ca2	Nd3	Ta5	0		0	11.8717	22.05	48.272	1	1.14	1.5			1300			o		5.62	5.864	8.113				66.8424
Ca2NdTaO6	Ca	Nd	Ta	O	s	f	d	1.34	0.983	0.64	0.8115	0.343	0.87609	0.856905	2	3	5	2	Ca2	Nd3	Ta5	0		0	11.8717	22.05	48.272	1	1.14	1.5	flux		1450			m	P21/n	5.618	5.871	8.114		90.25		66.9059
Ca2NiOsO6	Ca	Ni	Os	O	s	d	d	1.34	0.69	0.545	0.6175	0.145	0.960333	0.939304	2	2	6	4	Ca2	Ni2	Os6	0	8	2	11.8717	18.1688	70.1	1	1.91	2.2	ss	vacuum/Ar	850			m	P21/n	5.3763	5.5304	7.6448		90.241		56.8254		?	rs	1	black
Ca2NiReO6	Ca	Ni	Re	O	s	d	d	1.34	0.69	0.55	0.62	0.14	0.959145	0.938142	2	2	6	4	Ca2	Ni2	Re6	0	8	1	11.8717	18.1688	67	1	1.91	1.9	ss	Ar/vacuum	1400			?											rs?
Ca2NiReO6	Ca	Ni	Re	O	s	d	d	1.34	0.69	0.55	0.62	0.14	0.959145	0.938142	2	2	6	4	Ca2	Ni2	Re6	0	8	1	11.8717	18.1688	67	1	1.91	1.9		vacuum	1000			o		5.45	7.67	5.55				57.9996			rs
Ca2NiWO6	Ca	Ni	W	O	s	d	d	1.34	0.69	0.6	0.645	0.09	0.947419	0.926673	2	2	6	4	Ca2	Ni2	W6	0	8	0	11.8717	18.1688	64.77	1	1.91	2.36	sol-gel	air	1100			m	P21/n	5.4048	5.5369	7.6889		90.246		57.5237		151.4	rs	1	green
Ca2NiWO6	Ca	Ni	W	O	s	d	d	1.34	0.69	0.6	0.645	0.09	0.947419	0.926673	2	2	6	4	Ca2	Ni2	W6	0	8	0	11.8717	18.1688	64.77	1	1.91	2.36	ss	air	1280			o	Pmm2	7.6824	5.3996	5.5319				57.3684			rs?
Ca2NiWO6	Ca	Ni	W	O	s	d	d	1.34	0.69	0.6	0.645	0.09	0.947419	0.926673	2	2	6	4	Ca2	Ni2	W6	0	8	0	11.8717	18.1688	64.77	1	1.91	2.36	ss	air	1150			m	P21/n	5.4021	5.5351	7.6862		90.241		57.4561			rs		pale green
Ca2NiWO6	Ca	Ni	W	O	s	d	d	1.34	0.69	0.6	0.645	0.09	0.947419	0.926673	2	2	6	4	Ca2	Ni2	W6	0	8	0	11.8717	18.1688	64.77	1	1.91	2.36	ss	air	1200			m	P21/n	5.4056	5.5396	7.682		90.204		57.5087			rs
Ca2NiWO6	Ca	Ni	W	O	s	d	d	1.34	0.69	0.6	0.645	0.09	0.947419	0.926673	2	2	6	4	Ca2	Ni2	W6	0	8	0	11.8717	18.1688	64.77	1	1.91	2.36	ss	air	1150			m	P21/n	5.4061	5.5389	7.6895		90.232		57.5628			rs
Ca2NiWO6	Ca	Ni	W	O	s	d	d	1.34	0.69	0.6	0.645	0.09	0.947419	0.926673	2	2	6	4	Ca2	Ni2	W6	0	8	0	11.8717	18.1688	64.77	1	1.91	2.36	ss	air/O2	1300			o		5.55	5.4	7.7				57.6923			rs
Ca2NiWO6	Ca	Ni	W	O	s	d	d	1.34	0.69	0.6	0.645	0.09	0.947419	0.926673	2	2	6	4	Ca2	Ni2	W6	0	8	0	11.8717	18.1688	64.77	1	1.91	2.36	ss	air	1650			o		5.417	5.557	7.704				57.977					bright green
Ca2NiWO6	Ca	Ni	W	O	s	d	d	1.34	0.69	0.6	0.645	0.09	0.947419	0.926673	2	2	6	4	Ca2	Ni2	W6	0	8	0	11.8717	18.1688	64.77	1	1.91	2.36	ss	air	1650			c		8.069						65.6703					green
Ca2PdWO6	Ca	Pd	W	O	s	d	d	1.34	0.76	0.62	0.69	0.14	0.92702	0.906721	2	3	5	2	Ca2	Pd3	W5	0	7	1	11.8717	32.93	51.6	1	2.2	2.36	ss		1200			o	Pmm2	7.9946	5.5404	5.8008				64.2341
Ca2PrNbO6	Ca	Pr	Nb	O	s	f	d	1.34	0.99	0.64	0.815	0.35	0.874705	0.855551	2	3	5	2	Ca2	Pr3	Nb5	0		0	11.8717	21.6237	50.5728	1	1.13	1.6	ss	air	1400			m		5.62	5.86	8.11		90.08		66.772			rs
Ca2PrNbO6	Ca	Pr	Nb	O	s	f	d	1.34	0.99	0.64	0.815	0.35	0.874705	0.855551	2	3	5	2	Ca2	Pr3	Nb5	0		0	11.8717	21.6237	50.5728	1	1.13	1.6			1400			o		5.625	5.87	8.119				67.0198
Ca2PrNbO6	Ca	Pr	Nb	O	s	f	d	1.34	0.99	0.64	0.815	0.35	0.874705	0.855551	2	3	5	2	Ca2	Pr3	Nb5	0		0	11.8717	21.6237	50.5728	1	1.13	1.6	ss		1350			m	P21/n	5.631	5.88	8.127		90.2		67.2714			rs
Ca2PrRuO6	Ca	Pr	Ru	O	s	f	d	1.34	0.99	0.565	0.7775	0.425	0.889769	0.870285	2	3	5	2	Ca2	Pr3	Ru5	0		3	11.8717	21.6237	59	1	1.13	2.2	ss	air	1200			m	P21/n	5.58	5.68	8.23072		90.1		65.2169			rs	1
Ca2PrRuO6	Ca	Pr	Ru	O	s	f	d	1.34	0.99	0.565	0.7775	0.425	0.889769	0.870285	2	3	5	2	Ca2	Pr3	Ru5	0		3	11.8717	21.6237	59	1	1.13	2.2	ss
Ca2PrSbO6	Ca	Pr	Sb	O	s	f	p	1.34	0.99	0.6	0.795	0.39	0.882675	0.863347	2	3	5	2	Ca2	Pr3	Sb5	0		10	11.8717	21.6237	55	1	1.13	2.05			1300			o		5.633	5.859	8.119				66.9894
Ca2PrSbO6	Ca	Pr	Sb	O	s	f	p	1.34	0.99	0.6	0.795	0.39	0.882675	0.863347	2	3	5	2	Ca2	Pr3	Sb5	0		10	11.8717	21.6237	55	1	1.13	2.05			1400			m		4.082	4.077	4.082		92.15		67.8861
Ca2PrTaO6	Ca	Pr	Ta	O	s	f	d	1.34	0.99	0.64	0.815	0.35	0.874705	0.855551	2	3	5	2	Ca2	Pr3	Ta5	0		0	11.8717	21.6237	48.272	1	1.13	1.5	ss	air	1400			m		5.62	5.86	8.11		90.08		66.772			rs
Ca2PrTaO6	Ca	Pr	Ta	O	s	f	d	1.34	0.99	0.64	0.815	0.35	0.874705	0.855551	2	3	5	2	Ca2	Pr3	Ta5	0		0	11.8717	21.6237	48.272	1	1.13	1.5			1300			o		5.632	5.87	8.124				67.1445
Ca2PrTaO6	Ca	Pr	Ta	O	s	f	d	1.34	0.99	0.64	0.815	0.35	0.874705	0.855551	2	3	5	2	Ca2	Pr3	Ta5	0		0	11.8717	21.6237	48.272	1	1.13	1.5	ss		1400			m	P21/n	5.641	5.883	8.136		90.12		67.5002
Ca2ScNbO6	Ca	Sc	Nb	O	s	d	d	1.34	0.745	0.64	0.6925	0.105	0.925913	0.905637	2	3	5	2	Ca2	Sc3	Nb5	0	0	0	11.8717	24.7568	50.5728	1	1.36	1.6						m	P21/n	5.51222	5.63333	7.8688		89.995		61.0858			rs	0.96
Ca2ScNbO6	Ca	Sc	Nb	O	s	d	d	1.34	0.745	0.64	0.6925	0.105	0.925913	0.905637	2	3	5	2	Ca2	Sc3	Nb5	0	0	0	11.8717	24.7568	50.5728	1	1.36	1.6	ss	air	1400			m	P21/n	5.51222	5.63333	7.8688		89.995		61.0858		149.167	rs	0.96
Ca2ScNbO6	Ca	Sc	Nb	O	s	d	d	1.34	0.745	0.64	0.6925	0.105	0.925913	0.905637	2	3	5	2	Ca2	Sc3	Nb5	0	0	0	11.8717	24.7568	50.5728	1	1.36	1.6	ss		1400			m		3.946	3.957	3.946		91.4		61.5957
Ca2ScNbO6	Ca	Sc	Nb	O	s	d	d	1.34	0.745	0.64	0.6925	0.105	0.925913	0.905637	2	3	5	2	Ca2	Sc3	Nb5	0	0	0	11.8717	24.7568	50.5728	1	1.36	1.6	ss		1400
Ca2ScReO6	Ca	Sc	Re	O	s	d	d	1.34	0.745	0.58	0.6625	0.165	0.939381	0.91881	2	3	5	2	Ca2	Sc3	Re5	0	0	2	11.8717	24.7568	51.9	1	1.36	1.9	ss	ampoule	1000			o		5.49	7.86	5.63				60.7356			rs
Ca2ScReO6	Ca	Sc	Re	O	s	d	d	1.34	0.745	0.58	0.6625	0.165	0.939381	0.91881	2	3	5	2	Ca2	Sc3	Re5	0	0	2	11.8717	24.7568	51.9	1	1.36	1.9						o		5.49	7.86	5.63				60.7356
Ca2ScSbO6	Ca	Sc	Sb	O	s	d	p	1.34	0.745	0.6	0.6725	0.145	0.934848	0.914377	2	3	5	2	Ca2	Sc3	Sb5	0	0	10	11.8717	24.7568	55	1	1.36	2.05			1400			~c		3.92						60.2363
Ca2ScTaO6	Ca	Sc	Ta	O	s	d	d	1.34	0.745	0.64	0.6925	0.105	0.925913	0.905637	2	3	5	2	Ca2	Sc3	Ta5	0	0	0	11.8717	24.7568	48.272	1	1.36	1.5						m	P21/n	5.51119	5.6407	7.87187		89.989		61.1781			rs	0.9
Ca2ScTaO6	Ca	Sc	Ta	O	s	d	d	1.34	0.745	0.64	0.6925	0.105	0.925913	0.905637	2	3	5	2	Ca2	Sc3	Ta5	0	0	0	11.8717	24.7568	48.272	1	1.36	1.5	ss	air	1400			m	P21/n	5.51119	5.6407	7.87189		89.989		61.1783		150.067	rs	0.9
Ca2ScTaO6	Ca	Sc	Ta	O	s	d	d	1.34	0.745	0.64	0.6925	0.105	0.925913	0.905637	2	3	5	2	Ca2	Sc3	Ta5	0	0	0	11.8717	24.7568	48.272	1	1.36	1.5	ss		1400			m		4.007	4	4.007		91.5167		64.2017
Ca2SmNbO6	Ca	Sm	Nb	O	s	f	d	1.34	0.958	0.64	0.799	0.318	0.88107	0.861776	2	3	5	2	Ca2	Sm3	Nb5	0		0	11.8717	23.56	50.5728	1	1.17	1.6			1400			o		5.586	5.85	8.08				66.0098
Ca2SmNbO6	Ca	Sm	Nb	O	s	f	d	1.34	0.958	0.64	0.799	0.318	0.88107	0.861776	2	3	5	2	Ca2	Sm3	Nb5	0		0	11.8717	23.56	50.5728	1	1.17	1.6	ss	air	1400			m		5.59	5.86	8.09		90.17		66.2515			rs
Ca2SmNbO6	Ca	Sm	Nb	O	s	f	d	1.34	0.958	0.64	0.799	0.318	0.88107	0.861776	2	3	5	2	Ca2	Sm3	Nb5	0		0	11.8717	23.56	50.5728	1	1.17	1.6	ss		1350			m	P21/n	5.591	5.863	8.1		90.25		66.3789			rs
Ca2SmRuO6	Ca	Sm	Ru	O	s	f	d	1.34	0.958	0.565	0.7615	0.393	0.896356	0.876727	2	3	5	2	Ca2	Sm3	Ru5	0		3	11.8717	23.56	59	1	1.17	2.2	ss	air	1200			m	P21/n	5.54	5.65	8.23072		90		64.4075			rs	1
Ca2SmRuO6	Ca	Sm	Ru	O	s	f	d	1.34	0.958	0.565	0.7615	0.393	0.896356	0.876727	2	3	5	2	Ca2	Sm3	Ru5	0		3	11.8717	23.56	59	1	1.17	2.2	ss
Ca2SmSbO6	Ca	Sm	Sb	O	s	f	p	1.34	0.958	0.6	0.779	0.358	0.889157	0.869686	2	3	5	2	Ca2	Sm3	Sb5	0		10	11.8717	23.56	55	1	1.17	2.05			1300			o		5.592	5.842	8.078				65.974
Ca2SmSbO6	Ca	Sm	Sb	O	s	f	p	1.34	0.958	0.6	0.779	0.358	0.889157	0.869686	2	3	5	2	Ca2	Sm3	Sb5	0		10	11.8717	23.56	55	1	1.17	2.05			1400			m		4.081	4.075	4.081		92.3		67.8127
Ca2SmTaO6	Ca	Sm	Ta	O	s	f	d	1.34	0.958	0.64	0.799	0.318	0.88107	0.861776	2	3	5	2	Ca2	Sm3	Ta5	0		0	11.8717	23.56	48.272	1	1.17	1.5	ss	air	1400			m		5.6	5.85	8.09		90.08		66.257			rs
Ca2SmTaO6	Ca	Sm	Ta	O	s	f	d	1.34	0.958	0.64	0.799	0.318	0.88107	0.861776	2	3	5	2	Ca2	Sm3	Ta5	0		0	11.8717	23.56	48.272	1	1.17	1.5			1300			o		5.593	5.861	8.093				66.3233
Ca2SmTaO6	Ca	Sm	Ta	O	s	f	d	1.34	0.958	0.64	0.799	0.318	0.88107	0.861776	2	3	5	2	Ca2	Sm3	Ta5	0		0	11.8717	23.56	48.272	1	1.17	1.5	ss		1400			m	P21/n	5.593	5.864	8.1		90.3		66.4137
Ca2TaBiO6	Ca	Ta	Bi	O	s	d	p	1.34	0.72	0.76	0.74	0.04	0.905361	0.885536	2	3	5	2	Ca2	Ta3	Bi5	0	2	10	11.8717	23.1	54.856	1	1.5	2.02			1300			o		5.527	5.763	7.977				63.5211
Ca2TbNbO6	Ca	Tb	Nb	O	s	f	d	1.34	0.923	0.64	0.7815	0.283	0.888138	0.86869	2	3	5	2	Ca2	Tb3	Nb5	0		0	11.8717	21.91	50.5728	1	0	1.6			1400			o		5.562	5.838	8.058				65.4127
Ca2TbNbO6	Ca	Tb	Nb	O	s	f	d	1.34	0.923	0.64	0.7815	0.283	0.888138	0.86869	2	3	5	2	Ca2	Tb3	Nb5	0		0	11.8717	21.91	50.5728	1	0	1.6	ss	air	1400			m		5.57	5.83	8.07		90.2		65.5141			rs
Ca2TbNbO6	Ca	Tb	Nb	O	s	f	d	1.34	0.923	0.64	0.7815	0.283	0.888138	0.86869	2	3	5	2	Ca2	Tb3	Nb5	0		0	11.8717	21.91	50.5728	1	0	1.6	ss		1350			m	P21/n	5.566	5.842	8.084		90.24		65.7154			rs
Ca2TbRuO6	Ca	Tb	Ru	O	s	f	d	1.34	0.923	0.565	0.744	0.358	0.903672	0.883883	2	3	5	2	Ca2	Tb3	Ru5	0		3	11.8717	21.91	59	1	0	2.2	ss	air	1200			m	P21/n	5.5	5.63	8.20244		90		63.4971			rs	1
Ca2TbRuO6	Ca	Tb	Ru	O	s	f	d	1.34	0.923	0.565	0.744	0.358	0.903672	0.883883	2	3	5	2	Ca2	Tb3	Ru5	0		3	11.8717	21.91	59	1	0	2.2	ss
Ca2TbSbO6	Ca	Tb	Sb	O	s	f	p	1.34	0.923	0.6	0.7615	0.323	0.896356	0.876727	2	3	5	2	Ca2	Tb3	Sb5	0		10	11.8717	21.91	55	1	0	2.05			1300			o		5.577	5.825	8.058				65.4431
Ca2TbSbO6	Ca	Tb	Sb	O	s	f	p	1.34	0.923	0.6	0.7615	0.323	0.896356	0.876727	2	3	5	2	Ca2	Tb3	Sb5	0		10	11.8717	21.91	55	1	0	2.05			1400			m		4.053	4.053	4.053		92.38		66.5204
Ca2TbTaO6	Ca	Tb	Ta	O	s	f	d	1.34	0.923	0.64	0.7815	0.283	0.888138	0.86869	2	3	5	2	Ca2	Tb3	Ta5	0		0	11.8717	21.91	48.272	1	0	1.5			1300			o		5.574	5.833	8.057				65.4896
Ca2TbTaO6	Ca	Tb	Ta	O	s	f	d	1.34	0.923	0.64	0.7815	0.283	0.888138	0.86869	2	3	5	2	Ca2	Tb3	Ta5	0		0	11.8717	21.91	48.272	1	0	1.5	ss	air	1400			m		5.57	5.83	8.07		90		65.5145			rs
Ca2TbTaO6	Ca	Tb	Ta	O	s	f	d	1.34	0.923	0.64	0.7815	0.283	0.888138	0.86869	2	3	5	2	Ca2	Tb3	Ta5	0		0	11.8717	21.91	48.272	1	0	1.5	ss		1400			m	P21/n	5.569	5.838	8.081		90.28		65.6812
Ca2TiRuO6	Ca	Ti	Ru	O	s	d	d	1.34	0.605	0.62	0.6125	0.015	0.962719	0.941638	2	4	4	0	Ca2	Ti4	Ru4	0	0	4	11.8717	43.2672	45	1	1.54	2.2	ss	air	1300			o	Pnma	5.47444	7.65963	5.38421				56.4429			d	0
Ca2TiSiO6	Ca	Ti	Si	O	s	d	p	1.34	0.605	0.4	0.5025	0.205	1.01838	0.996082	2	4	4	0	Ca2	Ti4	Si4	0	0		11.8717	43.2672	45.1418	1	1.54	1.9	HP		1200			c	Fm-3m	7.41						50.8586			rs
Ca2TmNbO6	Ca	Tm	Nb	O	s	f	d	1.34	0.88	0.64	0.76	0.24	0.896978	0.877336	2	3	5	2	Ca2	Tm3	Nb5	0		0	11.8717	23.68	50.5728	1	1.25	1.6	ss		1400			m		4.018	4.011	4.018		92		64.7154
Ca2TmNbO6	Ca	Tm	Nb	O	s	f	d	1.34	0.88	0.64	0.76	0.24	0.896978	0.877336	2	3	5	2	Ca2	Tm3	Nb5	0		0	11.8717	23.68	50.5728	1	1.25	1.6	ss		1350			m	P21/n	5.578	5.789	8.025		90		64.7839			rs
Ca2TmRuO6	Ca	Tm	Ru	O	s	f	d	1.34	0.88	0.565	0.7225	0.315	0.912826	0.892837	2	3	5	2	Ca2	Tm3	Ru5	0		3	11.8717	23.68	59	1	1.25	2.2	ss	air	1200			m	P21/n	5.53	5.6	8.10344		90.3		62.736			rs	1
Ca2TmRuO6	Ca	Tm	Ru	O	s	f	d	1.34	0.88	0.565	0.7225	0.315	0.912826	0.892837	2	3	5	2	Ca2	Tm3	Ru5	0		3	11.8717	23.68	59	1	1.25	2.2	ss
Ca2TmSbO6	Ca	Tm	Sb	O	s	f	p	1.34	0.88	0.6	0.74	0.28	0.905361	0.885536	2	3	5	2	Ca2	Tm3	Sb5	0		10	11.8717	23.68	55	1	1.25	2.05			1400			m		4.016	3.998	4.016		91.85		64.4472
Ca2TmTaO6	Ca	Tm	Ta	O	s	f	d	1.34	0.88	0.64	0.76	0.24	0.896978	0.877336	2	3	5	2	Ca2	Tm3	Ta5	0		0	11.8717	23.68	48.272	1	1.25	1.5	ss		1400			m	P21/n	5.584	5.784	8.027		90		64.8137
Ca2TmTaO6	Ca	Tm	Ta	O	s	f	d	1.34	0.88	0.64	0.76	0.24	0.896978	0.877336	2	3	5	2	Ca2	Tm3	Ta5	0		0	11.8717	23.68	48.272	1	1.25	1.5	ss		1400			m		4.024	4.015	4.024		91.3333		64.9956
Ca2VMoO6	Ca	V	Mo	O	s	d	d	1.34	0.64	0.61	0.625	0.03	0.956777	0.935825	2	3	5	2	Ca2	V3	Mo5	0	2	1	11.8717	29.3111	54.4167	1	1.63	2.16	liquid mix/ss	H2/Ar	1200			o	Pnma	5.46613	7.6822	5.40335				56.7242			d	0	dark violet
Ca2VNbO6	Ca	V	Nb	O	s	d	d	1.34	0.64	0.64	0.64	0	0.949741	0.928944	2	3	5	2	Ca2	V3	Nb5	0	2	0	11.8717	29.3111	50.5728	1	1.63	1.6	ss	inert	1050			o	Pbnm	5.44	5.51	7.77				58.2253					black
Ca2VTaO6	Ca	V	Ta	O	s	d	d	1.34	0.64	0.64	0.64	0	0.949741	0.928944	2	3	5	2	Ca2	V3	Ta5	0	2	0	11.8717	29.3111	48.272	1	1.63	1.5	ss	inert	1050			o	Pbnm	5.45	5.49	7.76				58.0458					black
Ca2YbNbO6	Ca	Yb	Nb	O	s	f	d	1.34	0.868	0.64	0.754	0.228	0.899477	0.87978	2	3	5	2	Ca2	Yb3	Nb5	0		0	11.8717	25.053	50.5728	1	0	1.6	ss	air	1400			o		5.57	5.76	8				64.1664			rs
Ca2YbNbO6	Ca	Yb	Nb	O	s	f	d	1.34	0.868	0.64	0.754	0.228	0.899477	0.87978	2	3	5	2	Ca2	Yb3	Nb5	0		0	11.8717	25.053	50.5728	1	0	1.6			1400			o		5.571	5.763	8.004				64.2435
Ca2YbNbO6	Ca	Yb	Nb	O	s	f	d	1.34	0.868	0.64	0.754	0.228	0.899477	0.87978	2	3	5	2	Ca2	Yb3	Nb5	0		0	11.8717	25.053	50.5728	1	0	1.6	ss		1350			m	P21/n	5.573	5.772	8.015		90		64.4553			rs
Ca2YbRuO6	Ca	Yb	Ru	O	s	f	d	1.34	0.868	0.565	0.7165	0.303	0.915413	0.895368	2	3	5	2	Ca2	Yb3	Ru5	0		3	11.8717	25.053	59	1	0	2.2	ss	air	1200			m	P21/n	5.52	5.6	8.07516		90.3		62.404			rs	1
Ca2YbRuO6	Ca	Yb	Ru	O	s	f	d	1.34	0.868	0.565	0.7165	0.303	0.915413	0.895368	2	3	5	2	Ca2	Yb3	Ru5	0		3	11.8717	25.053	59	1	0	2.2	ss
Ca2YbSbO6	Ca	Yb	Sb	O	s	f	p	1.34	0.868	0.6	0.734	0.268	0.907907	0.888025	2	3	5	2	Ca2	Yb3	Sb5	0		10	11.8717	25.053	55	1	0	2.05			1300			o		5.573	5.751	7.999				64.0926
Ca2YbSbO6	Ca	Yb	Sb	O	s	f	p	1.34	0.868	0.6	0.734	0.268	0.907907	0.888025	2	3	5	2	Ca2	Yb3	Sb5	0		10	11.8717	25.053	55	1	0	2.05			1400			m		4.011	4.003	4.011		91.65		64.374
Ca2YbTaO6	Ca	Yb	Ta	O	s	f	d	1.34	0.868	0.64	0.754	0.228	0.899477	0.87978	2	3	5	2	Ca2	Yb3	Ta5	0		0	11.8717	25.053	48.272	1	0	1.5			1300			o		5.574	5.759	8.007				64.2575
Ca2YbTaO6	Ca	Yb	Ta	O	s	f	d	1.34	0.868	0.64	0.754	0.228	0.899477	0.87978	2	3	5	2	Ca2	Yb3	Ta5	0		0	11.8717	25.053	48.272	1	0	1.5	ss	air	1400			o		5.57	5.77	8				64.2778			rs
Ca2YbTaO6	Ca	Yb	Ta	O	s	f	d	1.34	0.868	0.64	0.754	0.228	0.899477	0.87978	2	3	5	2	Ca2	Yb3	Ta5	0		0	11.8717	25.053	48.272	1	0	1.5	ss		1400			m	P21/n	5.58	5.776	8.017		90.12		64.597
Ca2YNbO6	Ca	Y	Nb	O	s	d	d	1.34	0.9	0.64	0.77	0.26	0.892845	0.873293	2	3	5	2	Ca2	Y3	Nb5	0	0	0	11.8717	20.5244	50.5728	1	1.22	1.6			1400			o		5.575	5.812	8.043				65.1521
Ca2YNbO6	Ca	Y	Nb	O	s	d	d	1.34	0.9	0.64	0.77	0.26	0.892845	0.873293	2	3	5	2	Ca2	Y3	Nb5	0	0	0	11.8717	20.5244	50.5728	1	1.22	1.6	ss	air	1400			o		5.58	5.81	8.04				65.1638			rs
Ca2YNbO6	Ca	Y	Nb	O	s	d	d	1.34	0.9	0.64	0.77	0.26	0.892845	0.873293	2	3	5	2	Ca2	Y3	Nb5	0	0	0	11.8717	20.5244	50.5728	1	1.22	1.6						m	P21/n	5.58148	5.80933	8.05178		90.04		65.269			rs	1
Ca2YNbO6	Ca	Y	Nb	O	s	d	d	1.34	0.9	0.64	0.77	0.26	0.892845	0.873293	2	3	5	2	Ca2	Y3	Nb5	0	0	0	11.8717	20.5244	50.5728	1	1.22	1.6	ss	air	1400			m	P21/n	5.58148	5.80933	8.05178		90.04		65.269		144.8	rs
Ca2YRuO6	Ca	Y	Ru	O	s	d	d	1.34	0.9	0.565	0.7325	0.335	0.908545	0.88865	2	3	5	2	Ca2	Y3	Ru5	0	0	3	11.8717	20.5244	59	1	1.22	2.2	ss	air	1200			o		5.485	5.726	7.897				62.0055			rs
Ca2YRuO6	Ca	Y	Ru	O	s	d	d	1.34	0.9	0.565	0.7325	0.335	0.908545	0.88865	2	3	5	2	Ca2	Y3	Ru5	0	0	3	11.8717	20.5244	59	1	1.22	2.2	ss	air	1200			m	P21/n	5.52	5.63	8.16001		90.3		63.3975			rs	1
Ca2YRuO6	Ca	Y	Ru	O	s	d	d	1.34	0.9	0.565	0.7325	0.335	0.908545	0.88865	2	3	5	2	Ca2	Y3	Ru5	0	0	3	11.8717	20.5244	59	1	1.22	2.2	ss	air	1100			m	P21/n	5.5239	5.777	7.9637		90.23		63.533			rs
Ca2YRuO6	Ca	Y	Ru	O	s	d	d	1.34	0.9	0.565	0.7325	0.335	0.908545	0.88865	2	3	5	2	Ca2	Y3	Ru5	0	0	3	11.8717	20.5244	59	1	1.22	2.2	ss
Ca2YSbO6	Ca	Y	Sb	O	s	d	p	1.34	0.9	0.6	0.75	0.3	0.90115	0.881417	2	3	5	2	Ca2	Y3	Sb5	0	0	10	11.8717	20.5244	55	1	1.22	2.05			1300			o		5.581	5.803	8.051				65.186
Ca2YSbO6	Ca	Y	Sb	O	s	d	p	1.34	0.9	0.6	0.75	0.3	0.90115	0.881417	2	3	5	2	Ca2	Y3	Sb5	0	0	10	11.8717	20.5244	55	1	1.22	2.05			1400			m		4.038	4.028	4.038		92.08		65.6351
Ca2YTaO6	Ca	Y	Ta	O	s	d	d	1.34	0.9	0.64	0.77	0.26	0.892845	0.873293	2	3	5	2	Ca2	Y3	Ta5	0	0	0	11.8717	20.5244	48.272	1	1.22	1.5	ss	air	1400			o		5.58	5.81	8.04				65.1638			rs
Ca2YTaO6	Ca	Y	Ta	O	s	d	d	1.34	0.9	0.64	0.77	0.26	0.892845	0.873293	2	3	5	2	Ca2	Y3	Ta5	0	0	0	11.8717	20.5244	48.272	1	1.22	1.5			1300			o		5.578	5.814	8.05				65.2664
Ca2YTaO6	Ca	Y	Ta	O	s	d	d	1.34	0.9	0.64	0.77	0.26	0.892845	0.873293	2	3	5	2	Ca2	Y3	Ta5	0	0	0	11.8717	20.5244	48.272	1	1.22	1.5	ss		1400			m	P21/n	5.59049	5.80831	8.0545		89.973		65.385			rs	1
Ca2ZnMoO6	Ca	Zn	Mo	O	s	d	d	1.34	0.74	0.59	0.665	0.15	0.938243	0.917698	2	2	6	4	Ca2	Zn2	Mo6	0	10	0	11.8717	17.9644	68.827	1	1.65	2.16	ss		1250			o	Pmm2	5.743	5.499	7.916				62.4983
Ca2ZnTeO6	Ca	Zn	Te	O	s	d	p	1.34	0.74	0.56	0.65	0.18	0.945109	0.924413	2	2	6	4	Ca2	Zn2	Te6	0	10	10	11.8717	17.9644	69.1	1	1.65	2.1			1350			m		3.96	3.94	3.96		90.4		61.784			rs?
Ca2ZnTeO6	Ca	Zn	Te	O	s	d	p	1.34	0.74	0.56	0.65	0.18	0.945109	0.924413	2	2	6	4	Ca2	Zn2	Te6	0	10	10	11.8717	17.9644	69.1	1	1.65	2.1	ss					m											rs?
Ca2ZnWO6	Ca	Zn	W	O	s	d	d	1.34	0.74	0.6	0.67	0.14	0.935977	0.915481	2	2	6	4	Ca2	Zn2	W6	0	10	0	11.8717	17.9644	64.77	1	1.65	2.36	ss		1200			o	Pmm2	5.75	5.519	7.939				62.9846
Ca2ZrHfO6	Ca	Zr	Hf	O	s	d	d	1.34	0.72	0.71	0.715	0.01	0.916063	0.896003	2	4	4	0	Ca2	Zr4	Hf4	0	0	0	11.8717	34.4184	33.37	1	1.33	1.3	ss		1600			o		5.577	5.74	7.992				63.9599
Ca2FeOsO6	Ca	Fe	Os	O	s	d	d	1.34	0.645	0.575	0.61	0.07	0.963917	0.942809	2	3	5	2	Ca2	Fe3	Os5	0	5	3	11.8717	30.651	55	1	1.83	2.2	HP		1500			m	P21/n	5.3931	5.5084	7.679		89.0211		57.0224		152.4	rs	0.9
Cd2CaTeO6	Cd	Ca	Te	O	d	s	p	1.31	1	0.56	0.78	0.44	0.879018	0.849826	2	2	6	4	Cd2	Ca2	Te6	10	0	10	16.9083	11.8717	69.1	1.69	1	2.1			1100			m		3.97	4.01	3.97		92.1		63.1588			rs?
Cd2CaTeO6	Cd	Ca	Te	O	d	s	p	1.31	1	0.56	0.78	0.44	0.879018	0.849826	2	2	6	4	Cd2	Ca2	Te6	10	0	10	16.9083	11.8717	69.1	1.69	1	2.1	ss					m											rs?
Cd2CdTeO6	Cd	Cd	Te	O	d	d	p	1.31	0.95	0.56	0.755	0.39	0.889215	0.859684	2	2	6	4	Cd2	Cd2	Te6	10	10	10	16.9083	16.9083	69.1	1.69	1.69	2.1			1050			m		3.91	3.96	3.91		91.5		60.5201			rs?
Cd2CdTeO6	Cd	Cd	Te	O	d	d	p	1.31	0.95	0.56	0.755	0.39	0.889215	0.859684	2	2	6	4	Cd2	Cd2	Te6	10	10	10	16.9083	16.9083	69.1	1.69	1.69	2.1	ss					m											rs?
Cd2CoTeO6	Cd	Co	Te	O	d	d	p	1.31	0.745	0.56	0.6525	0.185	0.933622	0.902616	2	2	6	4	Cd2	Co2	Te6	10	7	10	16.9083	17.0844	69.1	1.69	1.88	2.1	ss					m	P21/n							55.743		147	rs	0.8
Cd2CoTeO6	Cd	Co	Te	O	d	d	p	1.31	0.745	0.56	0.6525	0.185	0.933622	0.902616	2	2	6	4	Cd2	Co2	Te6	10	7	10	16.9083	17.0844	69.1	1.69	1.88	2.1			1100			m		3.87	3.89	3.87		91.6		58.2374			rs?
Cd2CoTeO6	Cd	Co	Te	O	d	d	p	1.31	0.745	0.56	0.6525	0.185	0.933622	0.902616	2	2	6	4	Cd2	Co2	Te6	10	7	10	16.9083	17.0844	69.1	1.69	1.88	2.1	ss					m											rs?
Cd2FeNbO6	Cd	Fe	Nb	O	d	d	d	1.31	0.645	0.64	0.6425	0.005	0.938193	0.907035	2	3	5	2	Cd2	Fe3	Nb5	10	5	0	16.9083	30.651	50.5728	1.69	1.83	1.6								3.853	3.88	3.858		91.3333		57.6601
Cd2MgTeO6	Cd	Mg	Te	O	d	s	p	1.31	0.72	0.56	0.64	0.16	0.939343	0.908147	2	2	6	4	Cd2	Mg2	Te6	10		10	16.9083	15.0353	69.1	1.69	1.31	2.1			1100			m		3.85	3.84	3.85		91.8		56.8903			rs?
Cd2MgTeO6	Cd	Mg	Te	O	d	s	p	1.31	0.72	0.56	0.64	0.16	0.939343	0.908147	2	2	6	4	Cd2	Mg2	Te6	10		10	16.9083	15.0353	69.1	1.69	1.31	2.1	ss					m											rs?
Cd2MnTeO6	Cd	Mn	Te	O	d	d	p	1.31	0.83	0.56	0.695	0.27	0.914682	0.884305	2	2	6	4	Cd2	Mn2	Te6	10	5	10	16.9083	15.64	69.1	1.69	1.55	2.1			1100			m		3.85	3.88	3.85		91.6		57.4889			rs?
Cd2MnTeO6	Cd	Mn	Te	O	d	d	p	1.31	0.83	0.56	0.695	0.27	0.914682	0.884305	2	2	6	4	Cd2	Mn2	Te6	10	5	10	16.9083	15.64	69.1	1.69	1.55	2.1	ss					m											rs?
Cd2ZnTeO6	Cd	Zn	Te	O	d	d	p	1.31	0.74	0.56	0.65	0.18	0.934761	0.903717	2	2	6	4	Cd2	Zn2	Te6	10	10	10	16.9083	17.9644	69.1	1.69	1.65	2.1			1050			m		3.91	3.98	3.91		91.6		60.8229			rs?
Cd2ZnTeO6	Cd	Zn	Te	O	d	d	p	1.31	0.74	0.56	0.65	0.18	0.934761	0.903717	2	2	6	4	Cd2	Zn2	Te6	10	10	10	16.9083	17.9644	69.1	1.69	1.65	2.1	ss					m											rs?
Dy2CoMnO6	Dy	Co	Mn	O	f	d	d		0.745	0.53	0.6375	0.215	0.485865	0	3	2	4	2	Dy3	Co2	Mn4		7	3	22.93	17.0844	51.2	1.22	1.88	1.55	ss	air	1400			o		5.261	5.592	7.497				55.1395
Dy2CoMnO6	Dy	Co	Mn	O	f	d	d		0.745	0.53	0.6375	0.215	0.485865	0	3	2	4	2	Dy3	Co2	Mn4		7	3	22.93	17.0844	51.2	1.22	1.88	1.55
Dy2CoPtO6	Dy	Co	Pt	O	f	d	d		0.745	0.625	0.685	0.12	0.474796	0	3	2	4	2	Dy3	Co2	Pt4		7	6	22.93	17.0844	43	1.22	1.88	2.28	ss		1000					5.2785	5.6888	7.5675				56.8098
Dy2CuMnO6	Dy	Cu	Mn	O	f	d	d		0.73	0.53	0.63	0.2	0.48766	0	3	2	4	2	Dy3	Cu2	Mn4		9	3	22.93	20.2924	51.2	1.22	1.9	1.55						o		5.2768	5.7059	7.3762				55.5223			d	0
Dy2CuTiO6	Dy	Cu	Ti	O	f	d	d		0.73	0.605	0.6675	0.125	0.478815	0	3	2	4	2	Dy3	Cu2	Ti4		9	0	22.93	20.2924	43.2672	1.22	1.9	1.54						h
Dy2CuTiO6	Dy	Cu	Ti	O	f	d	d		0.73	0.605	0.6675	0.125	0.478815	0	3	2	4	2	Dy3	Cu2	Ti4		9	0	22.93	20.2924	43.2672	1.22	1.9	1.54						h
Dy2NiMnO6	Dy	Ni	Mn	O	f	d	d		0.69	0.53	0.61	0.16	0.492512	0	3	2	4	2	Dy3	Ni2	Mn4		8	3	22.93	18.1688	51.2	1.22	1.91	1.55	ss	air	1300			m	P21/n	5.2477	5.5462	7.5059		90.232		54.614		146.9	rs	1
Dy2NiMnO6	Dy	Ni	Mn	O	f	d	d		0.69	0.53	0.61	0.16	0.492512	0	3	2	4	2	Dy3	Ni2	Mn4		8	3	22.93	18.1688	51.2	1.22	1.91	1.55	nitrates	O2	1300			m	P21/c?	5.24	5.55	7.49533				54.4948		141.5	rs?
Dy2NiRuO6	Dy	Ni	Ru	O	f	d	d		0.69	0.62	0.655	0.07	0.481727	0	3	2	4	2	Dy3	Ni2	Ru4		8	4	22.93	18.1688	45	1.22	1.91	2.2	ss	capsule	1400			m	P21/n	5.28	5.691	7.568		90		56.8517			rs
Er2CuMnO6	Er	Cu	Mn	O	f	d	d		0.73	0.53	0.63	0.2	0.48766	0	3	2	4	2	Er3	Cu2	Mn4		9	3	22.74	20.2924	51.2	1.24	1.9	1.55						o		5.2588	5.709	7.3661				55.2872			d	0
Er2CuTiO6	Er	Cu	Ti	O	f	d	d		0.73	0.605	0.6675	0.125	0.478815	0	3	2	4	2	Er3	Cu2	Ti4		9	0	22.74	20.2924	43.2672	1.24	1.9	1.54						h
Er2CuTiO6	Er	Cu	Ti	O	f	d	d		0.73	0.605	0.6675	0.125	0.478815	0	3	2	4	2	Er3	Cu2	Ti4		9	0	22.74	20.2924	43.2672	1.24	1.9	1.54						h
Er2NiMnO6	Er	Ni	Mn	O	f	d	d		0.69	0.53	0.61	0.16	0.492512	0	3	2	4	2	Er3	Ni2	Mn4		8	3	22.74	18.1688	51.2	1.24	1.91	1.55	nitrates	O2	1300			m	P21/c?	5.2	5.55	7.46705				53.8747		140.333	rs?
Er2NiRuO6	Er	Ni	Ru	O	f	d	d		0.69	0.62	0.655	0.07	0.481727	0	3	2	4	2	Er3	Ni2	Ru4		8	4	22.74	18.1688	45	1.24	1.91	2.2	ss	capsule	1400			m	P21/n	5.241	5.664	7.536		90		55.9266			rs
Eu2CoMnO6	Eu	Co	Mn	O	f	d	d		0.745	0.53	0.6375	0.215	0.485865	0	3	2	4	2	Eu3	Co2	Mn4		7	3	24.92	17.0844	51.2	0	1.88	1.55	ss	air	1400			o		5.356	5.528	7.586				56.1515
Eu2CoMnO6	Eu	Co	Mn	O	f	d	d		0.745	0.53	0.6375	0.215	0.485865	0	3	2	4	2	Eu3	Co2	Mn4		7	3	24.92	17.0844	51.2	0	1.88	1.55	nitrates	O2	1300			m	P21/c?	5.32	5.58	7.58018				56.2556		140.333	rs?
Eu2CoMnO6	Eu	Co	Mn	O	f	d	d		0.745	0.53	0.6375	0.215	0.485865	0	3	2	4	2	Eu3	Co2	Mn4		7	3	24.92	17.0844	51.2	0	1.88	1.55	nitrate decomp					o	Pnma	5.573	7.578	5.359				56.5806			rs?
Eu2CoMnO6	Eu	Co	Mn	O	f	d	d		0.745	0.53	0.6375	0.215	0.485865	0	3	2	4	2	Eu3	Co2	Mn4		7	3	24.92	17.0844	51.2	0	1.88	1.55	ss	air	1420
Eu2CoMnO6	Eu	Co	Mn	O	f	d	d		0.745	0.53	0.6375	0.215	0.485865	0	3	2	4	2	Eu3	Co2	Mn4		7	3	24.92	17.0844	51.2	0	1.88	1.55	ss	air	273
Eu2CoMnO6	Eu	Co	Mn	O	f	d	d		0.745	0.53	0.6375	0.215	0.485865	0	3	2	4	2	Eu3	Co2	Mn4		7	3	24.92	17.0844	51.2	0	1.88	1.55
Eu2CoPtO6	Eu	Co	Pt	O	f	d	d		0.745	0.625	0.685	0.12	0.474796	0	3	2	4	2	Eu3	Co2	Pt4		7	6	24.92	17.0844	43	0	1.88	2.28	ss		1000					5.3541	5.7078	7.6417				58.3828
Eu2CoRuO6	Eu	Co	Ru	O	f	d	d		0.745	0.62	0.6825	0.125	0.475366	0	3	2	4	2	Eu3	Co2	Ru4		7	4	24.92	17.0844	45	0	1.88	2.2	ss	air	1400			m	P21/n	5.34856	5.74709	7.6348		90.0048		58.6709		145.188	rs	0.814
Eu2CuMnO6	Eu	Cu	Mn	O	f	d	d		0.73	0.53	0.63	0.2	0.48766	0	3	2	4	2	Eu3	Cu2	Mn4		9	3	24.92	20.2924	51.2	0	1.9	1.55						o		5.3557	5.6745	7.4368				56.5028			d	0
Eu2CuTiO6	Eu	Cu	Ti	O	f	d	d		0.73	0.605	0.6675	0.125	0.478815	0	3	2	4	2	Eu3	Cu2	Ti4		9	0	24.92	20.2924	43.2672	0	1.9	1.54						o		5.388	5.7543	7.539				58.4351			d	0
Eu2CuTiO6	Eu	Cu	Ti	O	f	d	d		0.73	0.605	0.6675	0.125	0.478815	0	3	2	4	2	Eu3	Cu2	Ti4		9	0	24.92	20.2924	43.2672	0	1.9	1.54	ss	air	1100			o	Pnma	5.75444	7.54182	5.38684				58.4458			d	0
Eu2LiIrO6	Eu	Li	Ir	O	f	s	d		0.76	0.57	0.665	0.19	0.479394	0	3	1	5	4	Eu3	Li1	Ir5			4	24.92	5.39171	57	0	0.98	2.2	flux		700			m	P21/n	5.3549	5.7538	7.6129		90.782		58.6348		144.933	rs
Eu2LiRuO6	Eu	Li	Ru	O	f	s	d		0.76	0.565	0.6625	0.195	0.479976	0	3	1	5	4	Eu3	Li1	Ru5			3	24.92	5.39171	59	0	0.98	2.2	ss	air	980			m	P21/n	5.35163	5.71895	7.60795		90.615		58.2083		146.1	rs	1
Eu2MgIrO6	Eu	Mg	Ir	O	f	s	d		0.72	0.625	0.6725	0.095	0.47766	0	3	2	4	2	Eu3	Mg2	Ir4			5	24.92	15.0353	40	0	1.31	2.2	flux		700			m	P21/n	5.3919	5.6797	7.7258		90.059		59.1494			rs	1
Eu2MgPtO6	Eu	Mg	Pt	O	f	s	d		0.72	0.625	0.6725	0.095	0.47766	0	3	2	4	2	Eu3	Mg2	Pt4			6	24.92	15.0353	43	0	1.31	2.28	ss		1000					5.3937	5.6861	7.7272				59.2466
Eu2MnRhO6	Eu	Mn	Rh	O	f	d	d		0.83	0.6	0.715	0.23	0.468061	0	3	2	4	2	Eu3	Mn2	Rh4		5	5	24.92	15.64	42	0	1.55	2.28	ss	air	1050			o	Pnma	5.7441	7.5945	5.3401				58.2386		148	d	0
Eu2MnTiO6	Eu	Mn	Ti	O	f	d	d		0.83	0.605	0.7175	0.225	0.467509	0	3	2	4	2	Eu3	Mn2	Ti4		5	0	24.92	15.64	43.2672	0	1.55	1.54	ss	H2/Ar	273			m		5.71	7.77817	5.41				60.0691			rs?
Eu2NiMnO6	Eu	Ni	Mn	O	f	d	d		0.69	0.53	0.61	0.16	0.492512	0	3	2	4	2	Eu3	Ni2	Mn4		8	3	24.92	18.1688	51.2	0	1.91	1.55	nitrate decomp					o	Pnma	5.502	7.538	5.311				55.0672			rs?
Eu2NiMnO6	Eu	Ni	Mn	O	f	d	d		0.69	0.53	0.61	0.16	0.492512	0	3	2	4	2	Eu3	Ni2	Mn4		8	3	24.92	18.1688	51.2	0	1.91	1.55	nitrates	O2	1300			m	P21/c?	5.32	5.52	7.56604				55.5469		143.667	rs?
Eu2NiMnO6	Eu	Ni	Mn	O	f	d	d		0.69	0.53	0.61	0.16	0.492512	0	3	2	4	2	Eu3	Ni2	Mn4		8	3	24.92	18.1688	51.2	0	1.91	1.55	ss	air	1400			o		5.386	5.548	7.697				57.4995
Eu2NiPtO6	Eu	Ni	Pt	O	f	d	d		0.69	0.625	0.6575	0.065	0.481142	0	3	2	4	2	Eu3	Ni2	Pt4		8	6	24.92	18.1688	43	0	1.91	2.28	ss		1000					5.358	5.7103	7.6842				58.776
Eu2NiRuO6	Eu	Ni	Ru	O	f	d	d		0.69	0.62	0.655	0.07	0.481727	0	3	2	4	2	Eu3	Ni2	Ru4		8	4	24.92	18.1688	45	0	1.91	2.2	ss	capsule	1400			m	P21/n	5.344	5.694	7.637		90		58.0961			rs
Eu2ZnPtO6	Eu	Zn	Pt	O	f	d	d		0.74	0.625	0.6825	0.115	0.475366	0	3	2	4	2	Eu3	Zn2	Pt4		10	6	24.92	17.9644	43	0	1.65	2.28	ss		1000					5.3975	5.749	7.7181				59.8736
Gd2CoMnO6	Gd	Co	Mn	O	f	d	d		0.745	0.53	0.6375	0.215	0.485865	0	3	2	4	2	Gd3	Co2	Mn4		7	3	20.63	17.0844	51.2	1.2	1.88	1.55	ss	air	1300			o		5.58	7.542	5.29				55.6566
Gd2CoMnO6	Gd	Co	Mn	O	f	d	d		0.745	0.53	0.6375	0.215	0.485865	0	3	2	4	2	Gd3	Co2	Mn4		7	3	20.63	17.0844	51.2	1.2	1.88	1.55	ss	air	1400			o		5.303	5.578	7.524				55.6402
Gd2CoMnO6	Gd	Co	Mn	O	f	d	d		0.745	0.53	0.6375	0.215	0.485865	0	3	2	4	2	Gd3	Co2	Mn4		7	3	20.63	17.0844	51.2	1.2	1.88	1.55	nitrates	O2	1300			m	P21/c?	5.3	5.59	7.5519				55.935		139.667	rs?
Gd2CoMnO6	Gd	Co	Mn	O	f	d	d		0.745	0.53	0.6375	0.215	0.485865	0	3	2	4	2	Gd3	Co2	Mn4		7	3	20.63	17.0844	51.2	1.2	1.88	1.55	nitrate decomp					o	Pnma	5.588	7.556	5.343				56.3993			rs?
Gd2CoMnO6	Gd	Co	Mn	O	f	d	d		0.745	0.53	0.6375	0.215	0.485865	0	3	2	4	2	Gd3	Co2	Mn4		7	3	20.63	17.0844	51.2	1.2	1.88	1.55	ss	air	273
Gd2CoMnO6	Gd	Co	Mn	O	f	d	d		0.745	0.53	0.6375	0.215	0.485865	0	3	2	4	2	Gd3	Co2	Mn4		7	3	20.63	17.0844	51.2	1.2	1.88	1.55
Gd2CoPtO6	Gd	Co	Pt	O	f	d	d		0.745	0.625	0.685	0.12	0.474796	0	3	2	4	2	Gd3	Co2	Pt4		7	6	20.63	17.0844	43	1.2	1.88	2.28	ss		1000					5.3152	5.7027	7.6186				57.7318
Gd2CoRuO6	Gd	Co	Ru	O	f	d	d		0.745	0.62	0.6825	0.125	0.475366	0	3	2	4	2	Gd3	Co2	Ru4		7	4	20.63	17.0844	45	1.2	1.88	2.2	ss	air	1400			m	P21/n	5.324	5.74387	7.61279		90.0019		58.2005		144.557	rs	0.81
Gd2CuMnO6	Gd	Cu	Mn	O	f	d	d		0.73	0.53	0.63	0.2	0.48766	0	3	2	4	2	Gd3	Cu2	Mn4		9	3	20.63	20.2924	51.2	1.2	1.9	1.55						o		5.3299	5.6869	7.4105				56.1542			d	0
Gd2CuTiO6	Gd	Cu	Ti	O	f	d	d		0.73	0.605	0.6675	0.125	0.478815	0	3	2	4	2	Gd3	Cu2	Ti4		9	0	20.63	20.2924	43.2672	1.2	1.9	1.54	ss	air	1100			o	Pnma	5.75742	7.52298	5.36018				58.0413			d	0
Gd2CuTiO6	Gd	Cu	Ti	O	f	d	d		0.73	0.605	0.6675	0.125	0.478815	0	3	2	4	2	Gd3	Cu2	Ti4		9	0	20.63	20.2924	43.2672	1.2	1.9	1.54						o		5.3627	5.7593	7.5215				58.0761			d	0
Gd2LiRuO6	Gd	Li	Ru	O	f	s	d		0.76	0.565	0.6625	0.195	0.479976	0	3	1	5	4	Gd3	Li1	Ru5			3	20.63	5.39171	59	1.2	0.98	2.2	ss	air	980			m	P21/n	5.2336	5.7181	7.5811		90.704		56.7142		146.4	rs	1
Gd2MgIrO6	Gd	Mg	Ir	O	f	s	d		0.72	0.625	0.6725	0.095	0.47766	0	3	2	4	2	Gd3	Mg2	Ir4			5	20.63	15.0353	40	1.2	1.31	2.2	flux		700			m	P21/n	5.3654	5.687	7.7013		90.193		58.7472			rs	1
Gd2MgPtO6	Gd	Mg	Pt	O	f	s	d		0.72	0.625	0.6725	0.095	0.47766	0	3	2	4	2	Gd3	Mg2	Pt4			6	20.63	15.0353	43	1.2	1.31	2.28	ss		1000					5.3685	5.6825	7.7031				58.7487
Gd2MnRhO6	Gd	Mn	Rh	O	f	d	d		0.83	0.6	0.715	0.23	0.468061	0	3	2	4	2	Gd3	Mn2	Rh4		5	5	20.63	15.64	42	1.2	1.55	2.28	ss	air	1050			o	Pnma	5.7418	7.5712	5.3135				57.7475		147.667	d	0
Gd2MnTiO6	Gd	Mn	Ti	O	f	d	d		0.83	0.605	0.7175	0.225	0.467509	0	3	2	4	2	Gd3	Mn2	Ti4		5	0	20.63	15.64	43.2672	1.2	1.55	1.54	ss	H2/Ar	273			m		5.71	7.77817	5.4				59.9581			rs?
Gd2NiMnO6	Gd	Ni	Mn	O	f	d	d		0.69	0.53	0.61	0.16	0.492512	0	3	2	4	2	Gd3	Ni2	Mn4		8	3	20.63	18.1688	51.2	1.2	1.91	1.55	ss	air	1300			m	P21/n	5.2955	5.5418	7.563		90.126		55.487		149.5	rs	1
Gd2NiMnO6	Gd	Ni	Mn	O	f	d	d		0.69	0.53	0.61	0.16	0.492512	0	3	2	4	2	Gd3	Ni2	Mn4		8	3	20.63	18.1688	51.2	1.2	1.91	1.55	nitrate decomp					o	Pnma	5.51	7.522	5.292				54.8333			rs?
Gd2NiMnO6	Gd	Ni	Mn	O	f	d	d		0.69	0.53	0.61	0.16	0.492512	0	3	2	4	2	Gd3	Ni2	Mn4		8	3	20.63	18.1688	51.2	1.2	1.91	1.55	nitrates	O2	1300			m	P21/c?	5.29	5.55	7.5519				55.43		143.333	rs?
Gd2NiPtO6	Gd	Ni	Pt	O	f	d	d		0.69	0.625	0.6575	0.065	0.481142	0	3	2	4	2	Gd3	Ni2	Pt4		8	6	20.63	18.1688	43	1.2	1.91	2.28	ss		1000					5.3298	5.7133	7.6581				58.2987
Gd2NiRuO6	Gd	Ni	Ru	O	f	d	d		0.69	0.62	0.655	0.07	0.481727	0	3	2	4	2	Gd3	Ni2	Ru4		8	4	20.63	18.1688	45	1.2	1.91	2.2	ss	capsule	1400			m	P21/n	5.329	5.708	7.624		90		57.9766			rs
Gd2ZnPtO6	Gd	Zn	Pt	O	f	d	d		0.74	0.625	0.6825	0.115	0.475366	0	3	2	4	2	Gd3	Zn2	Pt4		10	6	20.63	17.9644	43	1.2	1.65	2.28	ss		1000					5.3712	5.7409	7.6935				59.3083
Ho2CoMnO6	Ho	Co	Mn	O	f	d	d		0.745	0.53	0.6375	0.215	0.485865	0	3	2	4	2	Ho3	Co2	Mn4		7	3	22.84	17.0844	51.2	1.23	1.88	1.55	nitrates	O2	1300			m	P21/c?	5.22	5.59	7.46705				54.4717		136.833	rs?
Ho2CoMnO6	Ho	Co	Mn	O	f	d	d		0.745	0.53	0.6375	0.215	0.485865	0	3	2	4	2	Ho3	Co2	Mn4		7	3	22.84	17.0844	51.2	1.23	1.88	1.55	ss	air	1400			o		5.266	5.586	7.474				54.9636
Ho2CoPtO6	Ho	Co	Pt	O	f	d	d		0.745	0.625	0.685	0.12	0.474796	0	3	2	4	2	Ho3	Co2	Pt4		7	6	22.84	17.0844	43	1.23	1.88	2.28	ss		1000					5.2477	5.6637	7.5269				55.9275
Ho2CuMnO6	Ho	Cu	Mn	O	f	d	d		0.73	0.53	0.63	0.2	0.48766	0	3	2	4	2	Ho3	Cu2	Mn4		9	3	22.84	20.2924	51.2	1.23	1.9	1.55						o		5.2568	5.713	7.3637				55.2868			d	0
Ho2CuTiO6	Ho	Cu	Ti	O	f	d	d		0.73	0.605	0.6675	0.125	0.478815	0	3	2	4	2	Ho3	Cu2	Ti4		9	0	22.84	20.2924	43.2672	1.23	1.9	1.54						h
Ho2CuTiO6	Ho	Cu	Ti	O	f	d	d		0.73	0.605	0.6675	0.125	0.478815	0	3	2	4	2	Ho3	Cu2	Ti4		9	0	22.84	20.2924	43.2672	1.23	1.9	1.54						h
Ho2CuTiO6	Ho	Cu	Ti	O	f	d	d		0.73	0.605	0.6675	0.125	0.478815	0	3	2	4	2	Ho3	Cu2	Ti4		9	0	22.84	20.2924	43.2672	1.23	1.9	1.54						h
Ho2NiMnO6	Ho	Ni	Mn	O	f	d	d		0.69	0.53	0.61	0.16	0.492512	0	3	2	4	2	Ho3	Ni2	Mn4		8	3	22.84	18.1688	51.2	1.23	1.91	1.55	ss	air	1300			m	P21/n	5.2277	5.547	7.4895		89.726		54.2946		146.5	rs	1
Ho2NiMnO6	Ho	Ni	Mn	O	f	d	d		0.69	0.53	0.61	0.16	0.492512	0	3	2	4	2	Ho3	Ni2	Mn4		8	3	22.84	18.1688	51.2	1.23	1.91	1.55	nitrates	O2	1300			m	P21/c?	5.22	5.55	7.48119				54.1844		141	rs?
Ho2NiMnO6	Ho	Ni	Mn	O	f	d	d		0.69	0.53	0.61	0.16	0.492512	0	3	2	4	2	Ho3	Ni2	Mn4		8	3	22.84	18.1688	51.2	1.23	1.91	1.55	ss	air	1400			o		5.26	5.588	7.493				55.0602
Ho2NiRuO6	Ho	Ni	Ru	O	f	d	d		0.69	0.62	0.655	0.07	0.481727	0	3	2	4	2	Ho3	Ni2	Ru4		8	4	22.84	18.1688	45	1.23	1.91	2.2	ss	capsule	1400			m	P21/n	5.255	5.687	7.547		90		56.3859			rs
La2CaTiO6	La	Ca	Ti	O	d	s	d	1.36	1	0.605	0.8025	0.395	0.886091	0.873249	3	2	4	2	La3	Ca2	Ti4	0	0	0	19.1773	11.8717	43.2672	1.1	1	1.54	ss		1100			m		4.028	4.008	4.028		91.3333		65.0113
La2CaZrO6	La	Ca	Zr	O	d	s	d	1.36	1	0.72	0.86	0.28	0.863546	0.851031	3	2	4	2	La3	Ca2	Zr4	0	0	0	19.1773	11.8717	34.4184	1.1	1	1.33						?		4.166						72.3032
La2CoFeO6	La	Co	Fe	O	d	d	d	1.36	0.61	0.645	0.6275	0.035	0.962572	0.948622	3	3	3	0	La3	Co3	Fe3	0	6	5	19.1773	33.5	30.651	1.1	1.88	1.83	ss	air	1400			r	R-3c	5.384			61.33			56.8278			d	0	black
La2CoFeO6	La	Co	Fe	O	d	d	d	1.36	0.61	0.645	0.6275	0.035	0.962572	0.948622	3	3	3	0	La3	Co3	Fe3	0	6	5	19.1773	33.5	30.651	1.1	1.88	1.83	ss	air	1500			r	R-3c	5.4923		13.2306				57.606		162.6	d	0
La2CoIrO6	La	Co	Ir	O	d	d	d	1.36	0.745	0.625	0.685	0.12	0.936026	0.922461	3	2	4	2	La3	Co2	Ir4	0	7	5	19.1773	17.0844	40	1.1	1.88	2.2	ss	air	1200			m	P21/n	5.5819	5.6576	7.9078		89.98		62.4324		152.5	rs	0.95
La2CoIrO6	La	Co	Ir	O	d	d	d	1.36	0.745	0.625	0.685	0.12	0.936026	0.922461	3	2	4	2	La3	Co2	Ir4	0	7	5	19.1773	17.0844	40	1.1	1.88	2.2	ss	air	1500			m	P21/n	5.578	5.719	8.085		91.52		64.4564			rs?
La2CoIrO6	La	Co	Ir	O	d	d	d	1.36	0.745	0.625	0.685	0.12	0.936026	0.922461	3	2	4	2	La3	Co2	Ir4	0	7	5	19.1773	17.0844	40	1.1	1.88	2.2	ss	air/O2	1300			o		5.6	5.6	7.92				62.0928			rs
La2CoIrO6	La	Co	Ir	O	d	d	d	1.36	0.745	0.625	0.685	0.12	0.936026	0.922461	3	2	4	2	La3	Co2	Ir4	0	7	5	19.1773	17.0844	40	1.1	1.88	2.2	ss	air	975			m	P21/n	5.5907	5.672	7.9189		89.99		62.778		152.6	rs	1
La2CoMnO6	La	Co	Mn	O	d	d	d	1.36	0.745	0.53	0.6375	0.215	0.957848	0.943966	3	2	4	2	La3	Co2	Mn4	0	7	3	19.1773	17.0844	51.2	1.1	1.88	1.55	sol-gel	O2	1350			m	P21/n	5.528	7.767	5.494		90.01		58.9726			rs		greenish-gray
La2CoMnO6	La	Co	Mn	O	d	d	d	1.36	0.745	0.53	0.6375	0.215	0.957848	0.943966	3	2	4	2	La3	Co2	Mn4	0	7	3	19.1773	17.0844	51.2	1.1	1.88	1.55	ss	O2	1400			m	P21/n	5.5175	5.4758	7.7597		89.99		58.6104			rs	0.48
La2CoMnO6	La	Co	Mn	O	d	d	d	1.36	0.745	0.53	0.6375	0.215	0.957848	0.943966	3	2	4	2	La3	Co2	Mn4	0	7	3	19.1773	17.0844	51.2	1.1	1.88	1.55	ss	air	-1500			o	Pbnm	5.5191	5.4768	7.7635				58.6668		163.233	d	0
La2CoMnO6	La	Co	Mn	O	d	d	d	1.36	0.745	0.53	0.6375	0.215	0.957848	0.943966	3	2	4	2	La3	Co2	Mn4	0	7	3	19.1773	17.0844	51.2	1.1	1.88	1.55	ss	O2	1400			m	P21/n	5.5208	5.4826	7.7667		89.93		58.7712			rs	0.9
La2CoMnO6	La	Co	Mn	O	d	d	d	1.36	0.745	0.53	0.6375	0.215	0.957848	0.943966	3	2	4	2	La3	Co2	Mn4	0	7	3	19.1773	17.0844	51.2	1.1	1.88	1.55	ss	air	1370			m	P21/n	5.5311	5.4818	7.7791		89.911		58.9663		160.367	rs	0.48
La2CoMnO6	La	Co	Mn	O	d	d	d	1.36	0.745	0.53	0.6375	0.215	0.957848	0.943966	3	2	4	2	La3	Co2	Mn4	0	7	3	19.1773	17.0844	51.2	1.1	1.88	1.55	sol-gel	air	790			m	P21/n	5.5104	5.5162	7.8063		89.352		59.3172		160.067	rs	0.81
La2CoMnO6	La	Co	Mn	O	d	d	d	1.36	0.745	0.53	0.6375	0.215	0.957848	0.943966	3	2	4	2	La3	Co2	Mn4	0	7	3	19.1773	17.0844	51.2	1.1	1.88	1.55	sol-gel		1200			m	P21/n
La2CoMnO6	La	Co	Mn	O	d	d	d	1.36	0.745	0.53	0.6375	0.215	0.957848	0.943966	3	2	4	2	La3	Co2	Mn4	0	7	3	19.1773	17.0844	51.2	1.1	1.88	1.55	ss	air	1450
La2CoMnO6	La	Co	Mn	O	d	d	d	1.36	0.745	0.53	0.6375	0.215	0.957848	0.943966	3	2	4	2	La3	Co2	Mn4	0	7	3	19.1773	17.0844	51.2	1.1	1.88	1.55	ss	air	1300			o	Pnma	5.5	7.2	5.4				53.46			rs?
La2CoMnO6	La	Co	Mn	O	d	d	d	1.36	0.745	0.53	0.6375	0.215	0.957848	0.943966	3	2	4	2	La3	Co2	Mn4	0	7	3	19.1773	17.0844	51.2	1.1	1.88	1.55	nitrate decomp					o	Pnma	5.426	7.778	5.518				58.2196			rs?
La2CoMnO6	La	Co	Mn	O	d	d	d	1.36	0.745	0.53	0.6375	0.215	0.957848	0.943966	3	2	4	2	La3	Co2	Mn4	0	7	3	19.1773	17.0844	51.2	1.1	1.88	1.55	nitrates	O2	1300			m	P21/c?	5.52	5.48	7.76403				58.7147		145	rs?
La2CoMnO6	La	Co	Mn	O	d	d	d	1.36	0.745	0.53	0.6375	0.215	0.957848	0.943966	3	2	4	2	La3	Co2	Mn4	0	7	3	19.1773	17.0844	51.2	1.1	1.88	1.55	ss		1100			c		3.89						58.8639
La2CoMnO6	La	Co	Mn	O	d	d	d	1.36	0.745	0.53	0.6375	0.215	0.957848	0.943966	3	2	4	2	La3	Co2	Mn4	0	7	3	19.1773	17.0844	51.2	1.1	1.88	1.55	nitrate decomp	air	1100			m	P21/n	5.52519	5.4876	7.77868		89.9495		58.9624			rs	0.9
La2CoMnO6	La	Co	Mn	O	d	d	d	1.36	0.745	0.53	0.6375	0.215	0.957848	0.943966	3	2	4	2	La3	Co2	Mn4	0	7	3	19.1773	17.0844	51.2	1.1	1.88	1.55	ss	air	1400			c		7.792						59.1367
La2CoMnO6	La	Co	Mn	O	d	d	d	1.36	0.745	0.53	0.6375	0.215	0.957848	0.943966	3	2	4	2	La3	Co2	Mn4	0	7	3	19.1773	17.0844	51.2	1.1	1.88	1.55	sol-gel	air	700
La2CoMnO6	La	Co	Mn	O	d	d	d	1.36	0.745	0.53	0.6375	0.215	0.957848	0.943966	3	2	4	2	La3	Co2	Mn4	0	7	3	19.1773	17.0844	51.2	1.1	1.88	1.55	sol-gel	air	1300
La2CoMnO6	La	Co	Mn	O	d	d	d	1.36	0.745	0.53	0.6375	0.215	0.957848	0.943966	3	2	4	2	La3	Co2	Mn4	0	7	3	19.1773	17.0844	51.2	1.1	1.88	1.55	ss	air	-1500			o	Pbnm										d?
La2CoMnO6	La	Co	Mn	O	d	d	d	1.36	0.745	0.53	0.6375	0.215	0.957848	0.943966	3	2	4	2	La3	Co2	Mn4	0	7	3	19.1773	17.0844	51.2	1.1	1.88	1.55
La2CoPtO6	La	Co	Pt	O	d	d	d	1.36	0.745	0.625	0.685	0.12	0.936026	0.922461	3	2	4	2	La3	Co2	Pt4	0	7	6	19.1773	17.0844	43	1.1	1.88	2.28	ss		930			m	P21/n	5.5722	5.6459	7.8906		90		62.0597		149.233	rs	0.828
La2CoRhO6	La	Co	Rh	O	d	d	d	1.36	0.61	0.665	0.6375	0.055	0.957848	0.943966	3	3	3	0	La3	Co3	Rh3	0	6	6	19.1773	33.5	31.06	1.1	1.88	2.28	ss	air	1250			o		5.529	5.538	7.822				59.8766			d	0	black
La2CoRuO6	La	Co	Ru	O	d	d	d	1.36	0.745	0.62	0.6825	0.125	0.93715	0.923568	3	2	4	2	La3	Co2	Ru4	0	7	4	19.1773	17.0844	45	1.1	1.88	2.2	ss	air	1200			m	P21/n	5.5724	5.6288	7.8843		89.99		61.8246		153.2	rs	0.9
La2CoRuO6	La	Co	Ru	O	d	d	d	1.36	0.745	0.62	0.6825	0.125	0.93715	0.923568	3	2	4	2	La3	Co2	Ru4	0	7	4	19.1773	17.0844	45	1.1	1.88	2.2	ss	air	1400			m	P21/n	5.57558	5.63998	7.8878		90.0002		62.0103		152.865	rs	0.962
La2CoRuO6	La	Co	Ru	O	d	d	d	1.36	0.745	0.62	0.6825	0.125	0.93715	0.923568	3	2	4	2	La3	Co2	Ru4	0	7	4	19.1773	17.0844	45	1.1	1.88	2.2	sol-gel	air	1150			m	P21/n	5.65	7.893	5.574		90.09		62.1437			rs
La2CoRuO6	La	Co	Ru	O	d	d	d	1.36	0.745	0.62	0.6825	0.125	0.93715	0.923568	3	2	4	2	La3	Co2	Ru4	0	7	4	19.1773	17.0844	45	1.1	1.88	2.2	ss	air	1150			m	P21/n	5.575	5.64	8.13173				63.9215			rs	0.85
La2CoRuO6	La	Co	Ru	O	d	d	d	1.36	0.745	0.62	0.6825	0.125	0.93715	0.923568	3	2	4	2	La3	Co2	Ru4	0	7	4	19.1773	17.0844	45	1.1	1.88	2.2																	d?
La2CoRuO6	La	Co	Ru	O	d	d	d	1.36	0.745	0.62	0.6825	0.125	0.93715	0.923568	3	2	4	2	La3	Co2	Ru4	0	7	4	19.1773	17.0844	45	1.1	1.88	2.2
La2CoTiO6	La	Co	Ti	O	d	d	d	1.36	0.745	0.605	0.675	0.14	0.940537	0.926906	3	2	4	2	La3	Co2	Ti4	0	7	0	19.1773	17.0844	43.2672	1.1	1.88	1.54	ss	vacuum	1175			m	P21/n	5.5703	5.5954	7.8797		89.955		61.3987		?	rs	0.782
La2CoTiO6	La	Co	Ti	O	d	d	d	1.36	0.745	0.605	0.675	0.14	0.940537	0.926906	3	2	4	2	La3	Co2	Ti4	0	7	0	19.1773	17.0844	43.2672	1.1	1.88	1.54	ss		1100			c		3.922						60.3285
La2CoTiO6	La	Co	Ti	O	d	d	d	1.36	0.745	0.605	0.675	0.14	0.940537	0.926906	3	2	4	2	La3	Co2	Ti4	0	7	0	19.1773	17.0844	43.2672	1.1	1.88	1.54	sol-gel	air	900			m	P21/n	5.5621	5.5667	7.8502		89.86		60.7654		156.533	rs	0.48
La2CoVO6	La	Co	V	O	d	d	d	1.36	0.745	0.58	0.6625	0.165	0.946237	0.932524	3	2	4	2	La3	Co2	V4	0	7	1	19.1773	17.0844	46.709	1.1	1.88	1.63	ss	vacuum	1175			o	Pnma	5.5402	7.8247	5.5429				60.0717		?	d	0
La2CoVO6	La	Co	V	O	d	d	d	1.36	0.745	0.58	0.6625	0.165	0.946237	0.932524	3	2	4	2	La3	Co2	V4	0	7	1	19.1773	17.0844	46.709	1.1	1.88	1.63	ss	vacuum	1020			o		5.5476	7.8297	5.5381				60.1383					black
La2CrCoO6	La	Cr	Co	O	d	d	d	1.36	0.615	0.61	0.6125	0.005	0.969746	0.955692	3	3	3	0	La3	Cr3	Co3	0	3	6	19.1773	30.959	33.5	1.1	1.66	1.88	sol-gel		850			r		5.46		13.16									greenish gray
La2CrFeO6	La	Cr	Fe	O	d	d	d	1.36	0.615	0.645	0.63	0.03	0.961387	0.947453	3	3	3	0	La3	Cr3	Fe3	0	3	5	19.1773	30.959	30.651	1.1	1.66	1.83	ss	N2	1350			o	Pbnm	5.5371	5.5189	7.808				59.6506			d	0
La2CrMnO6	La	Cr	Mn	O	d	d	d	1.36	0.615	0.645	0.63	0.03	0.961387	0.947453	3	3	3	0	La3	Cr3	Mn3	0	3	4	19.1773	30.959	33.668	1.1	1.66	1.55	ss	air	1350
La2CrMnO6	La	Cr	Mn	O	d	d	d	1.36	0.615	0.645	0.63	0.03	0.961387	0.947453	3	3	3	0	La3	Cr3	Mn3	0	3	4	19.1773	30.959	33.668	1.1	1.66	1.55	ss	air	273			o	Pbnm	5.5286	5.5112	7.8016				59.4272			d
La2CrMnO6	La	Cr	Mn	O	d	d	d	1.36	0.615	0.645	0.63	0.03	0.961387	0.947453	3	3	3	0	La3	Cr3	Mn3	0	3	4	19.1773	30.959	33.668	1.1	1.66	1.55	ss	air	1400			o	Pnma	5.51	7.805	5.529				59.4444
La2CrRhO6	La	Cr	Rh	O	d	d	d	1.36	0.615	0.665	0.64	0.05	0.956674	0.942809	3	3	3	0	La3	Cr3	Rh3	0	3	6	19.1773	30.959	31.06	1.1	1.66	2.28	ss	air	1400			o		5.552	5.565	7.851				60.6429			d	0	brown
La2CuIrO6	La	Cu	Ir	O	d	d	d	1.36	0.73	0.625	0.6775	0.105	0.939405	0.925791	3	2	4	2	La3	Cu2	Ir4	0	9	5	19.1773	20.2924	40	1.1	1.9	2.2	ss	air	1500			m	P21/n	5.795	5.6	7.73		87.33		62.6454			rs?
La2CuIrO6	La	Cu	Ir	O	d	d	d	1.36	0.73	0.625	0.6775	0.105	0.939405	0.925791	3	2	4	2	La3	Cu2	Ir4	0	9	5	19.1773	20.2924	40	1.1	1.9	2.2	ss	air/O2	1300			m		5.8	5.6	7.72		87		62.6005			rs
La2CuIrO6	La	Cu	Ir	O	d	d	d	1.36	0.73	0.625	0.6775	0.105	0.939405	0.925791	3	2	4	2	La3	Cu2	Ir4	0	9	5	19.1773	20.2924	40	1.1	1.9	2.2						m		5.603	5.788	7.726		91.4		62.6202			rs
La2CuIrO6	La	Cu	Ir	O	d	d	d	1.36	0.73	0.625	0.6775	0.105	0.939405	0.925791	3	2	4	2	La3	Cu2	Ir4	0	9	5	19.1773	20.2924	40	1.1	1.9	2.2	ss	air	1100			m		5.606	7.732	5.807		87.23		62.8534			rs
La2CuMnO6	La	Cu	Mn	O	d	d	d	1.36	0.73	0.53	0.63	0.2	0.961387	0.947453	3	2	4	2	La3	Cu2	Mn4	0	9	3	19.1773	20.2924	51.2	1.1	1.9	1.55	sol-gel	air	1000			o	Pbnm	5.485	5.5267	7.7708				58.8909		155.633	d	0
La2CuMnO6	La	Cu	Mn	O	d	d	d	1.36	0.73	0.53	0.63	0.2	0.961387	0.947453	3	2	4	2	La3	Cu2	Mn4	0	9	3	19.1773	20.2924	51.2	1.1	1.9	1.55						c		7.784						58.9547			rs
La2CuRhO6	La	Cu	Rh	O	d	d	d	1.36	0.73	0.6	0.665	0.13	0.945092	0.931395	3	2	4	2	La3	Cu2	Rh4	0	9	5	19.1773	20.2924	42	1.1	1.9	2.28	ss	O2	1300					5.5507	5.6776	7.8306				61.685			d	0
La2CuRhO6	La	Cu	Rh	O	d	d	d	1.36	0.73	0.6	0.665	0.13	0.945092	0.931395	3	2	4	2	La3	Cu2	Rh4	0	9	5	19.1773	20.2924	42	1.1	1.9	2.28	ss	O2	1300			o		5.552	5.709	7.844				62.1566			d	0	black
La2CuRuO6	La	Cu	Ru	O	d	d	d	1.36	0.73	0.62	0.675	0.11	0.940537	0.926906	3	2	4	2	La3	Cu2	Ru4	0	9	4	19.1773	20.2924	45	1.1	1.9	2.2	ss	air	1200			m	P21/n	5.5817	5.7487	7.7444		89.87		62.1245			rs	0.7
La2CuRuO6	La	Cu	Ru	O	d	d	d	1.36	0.73	0.62	0.675	0.11	0.940537	0.926906	3	2	4	2	La3	Cu2	Ru4	0	9	4	19.1773	20.2924	45	1.1	1.9	2.2	ss	air	1150			m	P21/n	5.5897	5.755	7.7584		90.15		62.3942			rs	0.6
La2CuSnO6	La	Cu	Sn	O	d	d	p	1.36	0.73	0.69	0.71	0.04	0.924936	0.911531	3	2	4	2	La3	Cu2	Sn4	0	9	10	19.1773	20.2924	40.735	1.1	1.9	1.96	ss	air	980			m	P21/m										l
La2CuSnO6	La	Cu	Sn	O	d	d	p	1.36	0.73	0.69	0.71	0.04	0.924936	0.911531	3	2	4	2	La3	Cu2	Sn4	0	9	10	19.1773	20.2924	40.735	1.1	1.9	1.96	ss	air	1000			m	P21/m	8.5032	7.8109	7.8131		91.143		64.8531		163	l
La2CuSnO6	La	Cu	Sn	O	d	d	p	1.36	0.73	0.69	0.71	0.04	0.924936	0.911531	3	2	4	2	La3	Cu2	Sn4	0	9	10	19.1773	20.2924	40.735	1.1	1.9	1.96						m	P21/m	8.506	7.811	7.814		91.4		64.8763			l
La2CuSnO6	La	Cu	Sn	O	d	d	p	1.36	0.73	0.69	0.71	0.04	0.924936	0.911531	3	2	4	2	La3	Cu2	Sn4	0	9	10	19.1773	20.2924	40.735	1.1	1.9	1.96	ss	air	980			m	P21/m	8.506	7.811	7.814		91.14		64.8828			l	1	dark brown
La2CuSnO6	La	Cu	Sn	O	d	d	p	1.36	0.73	0.69	0.71	0.04	0.924936	0.911531	3	2	4	2	La3	Cu2	Sn4	0	9	10	19.1773	20.2924	40.735	1.1	1.9	1.96						m	P21/m	8.505	7.815	7.815		91.1		64.9176			l
La2CuTiO6	La	Cu	Ti	O	d	d	d	1.36	0.73	0.605	0.6675	0.125	0.943949	0.930269	3	2	4	2	La3	Cu2	Ti4	0	9	0	19.1773	20.2924	43.2672	1.1	1.9	1.54	ss	air	1300			o	Pnma	5.6243	7.8445	5.5704				61.4413			d	0
La2CuTiO6	La	Cu	Ti	O	d	d	d	1.36	0.73	0.605	0.6675	0.125	0.943949	0.930269	3	2	4	2	La3	Cu2	Ti4	0	9	0	19.1773	20.2924	43.2672	1.1	1.9	1.54	ss	air	1100			c?		7.88						61.163
La2CuTiO6	La	Cu	Ti	O	d	d	d	1.36	0.73	0.605	0.6675	0.125	0.943949	0.930269	3	2	4	2	La3	Cu2	Ti4	0	9	0	19.1773	20.2924	43.2672	1.1	1.9	1.54	ss	air	1400			o	Pnma	5.6267	7.8417	5.5734				61.4786			d	0
La2CuTiO6	La	Cu	Ti	O	d	d	d	1.36	0.73	0.605	0.6675	0.125	0.943949	0.930269	3	2	4	2	La3	Cu2	Ti4	0	9	0	19.1773	20.2924	43.2672	1.1	1.9	1.54	ss	air	1000			c		7.872						60.9769
La2CuTiO6	La	Cu	Ti	O	d	d	d	1.36	0.73	0.605	0.6675	0.125	0.943949	0.930269	3	2	4	2	La3	Cu2	Ti4	0	9	0	19.1773	20.2924	43.2672	1.1	1.9	1.54	sol-gel	air	675			o		5.575	7.866	5.579				61.1639			d	0
La2CuTiO6	La	Cu	Ti	O	d	d	d	1.36	0.73	0.605	0.6675	0.125	0.943949	0.930269	3	2	4	2	La3	Cu2	Ti4	0	9	0	19.1773	20.2924	43.2672	1.1	1.9	1.54	ss	air	1100			o	Pnma	5.6136	7.8446	5.5659				61.2756			d	0
La2CuTiO6	La	Cu	Ti	O	d	d	d	1.36	0.73	0.605	0.6675	0.125	0.943949	0.930269	3	2	4	2	La3	Cu2	Ti4	0	9	0	19.1773	20.2924	43.2672	1.1	1.9	1.54	ss	air	1400			o	Pnma	5.6262	7.8396	5.5702				61.4214		155	d	0
La2CuTiO6	La	Cu	Ti	O	d	d	d	1.36	0.73	0.605	0.6675	0.125	0.943949	0.930269	3	2	4	2	La3	Cu2	Ti4	0	9	0	19.1773	20.2924	43.2672	1.1	1.9	1.54						o		5.586	5.616	7.842				61.5028			d	0
La2CuTiO6	La	Cu	Ti	O	d	d	d	1.36	0.73	0.605	0.6675	0.125	0.943949	0.930269	3	2	4	2	La3	Cu2	Ti4	0	9	0	19.1773	20.2924	43.2672	1.1	1.9	1.54	ss	air	960			o	Pbnm	5.587	5.616	7.842				61.5138			d	0
La2CuTiO6	La	Cu	Ti	O	d	d	d	1.36	0.73	0.605	0.6675	0.125	0.943949	0.930269	3	2	4	2	La3	Cu2	Ti4	0	9	0	19.1773	20.2924	43.2672	1.1	1.9	1.54	ss	air	1100			o	Pnma	5.616	7.842	5.587				61.5138			d	0
La2CuZrO6	La	Cu	Zr	O	d	d	d	1.36	0.73	0.72	0.725	0.01	0.918407	0.905097	3	2	4	2	La3	Cu2	Zr4	0	9	0	19.1773	20.2924	34.4184	1.1	1.9	1.33	HP		1100			m	P21/m	8.5683	7.8597	7.8557		91.512		66.1065		159	l
La2FeIrO6	La	Fe	Ir	O	d	d	d	1.36	0.645	0.68	0.6625	0.035	0.946237	0.932524	3	3	3	0	La3	Fe3	Ir3	0	5	6	19.1773	30.651	28	1.1	1.83	2.2	ss	air	1100			m	P21/n	5.573	5.572	7.896		89.69		61.2972			rs	0.64
La2FeMnO6	La	Fe	Mn	O	d	d	d	1.36	0.645	0.645	0.645	0	0.954335	0.940504	3	3	3	0	La3	Fe3	Mn3	0	5	4	19.1773	30.651	33.668	1.1	1.83	1.55	ss		1100			c		3.918						60.1441
La2FeMnO6	La	Fe	Mn	O	d	d	d	1.36	0.645	0.645	0.645	0	0.954335	0.940504	3	3	3	0	La3	Fe3	Mn3	0	5	4	19.1773	30.651	33.668	1.1	1.83	1.55	ss	air	273			o	Pbnm	5.5415	5.5618	7.8328				60.3531			d
La2FeMnO6	La	Fe	Mn	O	d	d	d	1.36	0.645	0.645	0.645	0	0.954335	0.940504	3	3	3	0	La3	Fe3	Mn3	0	5	4	19.1773	30.651	33.668	1.1	1.83	1.55	sol-gel	air				o											d	0
La2FeRhO6	La	Fe	Rh	O	d	d	d	1.36	0.645	0.665	0.655	0.02	0.949691	0.935927	3	3	3	0	La3	Fe3	Rh3	0	5	6	19.1773	30.651	31.06	1.1	1.83	2.28	ss	air	1300			o		5.572	5.599	7.874				61.4125			d	0	brown
La2FeRuO6	La	Fe	Ru	O	d	d	d	1.36	0.645	0.68	0.6625	0.035	0.946237	0.932524	3	3	3	0	La3	Fe3	Ru3	0	5	5	19.1773	30.651	28.47	1.1	1.83	2.2	sol-gel	N2	1100			o	Pbnm	5.574	5.61	7.898				61.7429			d	0
La2FeTiO6	La	Fe	Ti	O	d	d	d	1.36	0.78	0.605	0.6925	0.175	0.932671	0.919154	3	2	4	2	La3	Fe2	Ti4	0	6	0	19.1773	16.1992	43.2672	1.1	1.83	1.54	ss	air	1100			c?		7.82						59.7765
La2FeVO6	La	Fe	V	O	d	d	d	1.36	0.78	0.58	0.68	0.2	0.938276	0.924678	3	2	4	2	La3	Fe2	V4	0	6	1	19.1773	16.1992	46.709	1.1	1.83	1.63	ss	H2/Ar	273			o	Pnma	5.5627	5.5549	7.8536				60.6695
La2GaCoO6	La	Ga	Co	O	d	p	d	1.36	0.62	0.61	0.615	0.01	0.968543	0.954506	3	3	3	0	La3	Ga3	Co3	0	10	6	19.1773	30.7258	33.5	1.1	1.81	1.88	ss		1400			r	R-3c	5.469		13.196				56.9689			d	0
La2GaFeO6	La	Ga	Fe	O	d	p	d	1.36	0.62	0.645	0.6325	0.025	0.960204	0.946288	3	3	3	0	La3	Ga3	Fe3	0	10	5	19.1773	30.7258	30.651	1.1	1.81	1.83	ss	air	1450			o	Pnma	5.5278	7.8173	5.5395				59.8439			d	0
La2GaFeO6	La	Ga	Fe	O	d	p	d	1.36	0.62	0.645	0.6325	0.025	0.960204	0.946288	3	3	3	0	La3	Ga3	Fe3	0	10	5	19.1773	30.7258	30.651	1.1	1.81	1.83	ss		1400			o	Pnma	5.53	7.822	5.542				59.9307			d	0
La2GaMnO6	La	Ga	Mn	O	d	p	d	1.36	0.62	0.645	0.6325	0.025	0.960204	0.946288	3	3	3	0	La3	Ga3	Mn3	0	10	4	19.1773	30.7258	33.668	1.1	1.81	1.55	ss	air	1300			o	Pnma	5.51122	7.80515	5.52947				59.4638		159.087	d	0	black
La2GaMnO6	La	Ga	Mn	O	d	p	d	1.36	0.62	0.645	0.6325	0.025	0.960204	0.946288	3	3	3	0	La3	Ga3	Mn3	0	10	4	19.1773	30.7258	33.668	1.1	1.81	1.55	floating-zone							5.52	5.54	7.78				59.4797			d	0
La2GaMnO6	La	Ga	Mn	O	d	p	d	1.36	0.62	0.645	0.6325	0.025	0.960204	0.946288	3	3	3	0	La3	Ga3	Mn3	0	10	4	19.1773	30.7258	33.668	1.1	1.81	1.55	sol-gel	Ar	1300			o	Pbnm										d?
La2GaMnO6	La	Ga	Mn	O	d	p	d	1.36	0.62	0.645	0.6325	0.025	0.960204	0.946288	3	3	3	0	La3	Ga3	Mn3	0	10	4	19.1773	30.7258	33.668	1.1	1.81	1.55	ss		1400			o	Pnma	5.495	7.784	5.53				59.1338			d	0
La2GaMnO6	La	Ga	Mn	O	d	p	d	1.36	0.62	0.645	0.6325	0.025	0.960204	0.946288	3	3	3	0	La3	Ga3	Mn3	0	10	4	19.1773	30.7258	33.668	1.1	1.81	1.55	ss	Ar	1400			o	Pbnm	5.525	5.5391	7.7943				59.6333			d	0
La2GaNiO6	La	Ga	Ni	O	d	p	d	1.36	0.62	0.6	0.61	0.02	0.970953	0.956881	3	3	3	0	La3	Ga3	Ni3	0	10	7	19.1773	30.7258	35.187	1.1	1.81	1.91	ss		1400			r	R-3c	5.492		13.224				57.5709			d	0
La2GaRuO6	La	Ga	Ru	O	d	p	d	1.36	0.62	0.68	0.65	0.06	0.952007	0.93821	3	3	3	0	La3	Ga3	Ru3	0	10	5	19.1773	30.7258	28.47	1.1	1.81	2.2	ss	vacuum	1350			o	Pbnm	5.5522	5.5551	7.856				60.5757
La2LiFeO6	La	Li	Fe	O	d	s	d	1.36	0.76		0.76	0.76	0.903525	0.890431	3	1	5	4	La3	Li1	Fe5	0		3	19.1773	5.39171	75	1.1	0.98	1.83	HP	O2	900			r	R3-c	5.371			60.66			55.596			rs
La2LiIrO6	La	Li	Ir	O	d	s	d	1.36	0.76	0.57	0.665	0.19	0.945092	0.931395	3	1	5	4	La3	Li1	Ir5	0		4	19.1773	5.39171	57	1.1	0.98	2.2	flux		700			m	P21/n	5.5536	5.6355	7.8528		90.177		61.4426		154.2	rs
La2LiIrO6	La	Li	Ir	O	d	s	d	1.36	0.76	0.57	0.665	0.19	0.945092	0.931395	3	1	5	4	La3	Li1	Ir5	0		4	19.1773	5.39171	57	1.1	0.98	2.2	ss	air	850			o		5.634	5.555	7.867				61.5531			rs
La2LiIrO6	La	Li	Ir	O	d	s	d	1.36	0.76	0.57	0.665	0.19	0.945092	0.931395	3	1	5	4	La3	Li1	Ir5	0		4	19.1773	5.39171	57	1.1	0.98	2.2	ss	HP O2	800			o		5.635	5.556	7.869				61.5908			rs?		black
La2LiIrO6	La	Li	Ir	O	d	s	d	1.36	0.76	0.57	0.665	0.19	0.945092	0.931395	3	1	5	4	La3	Li1	Ir5	0		4	19.1773	5.39171	57	1.1	0.98	2.2	HP		800			o		5.63	5.58	7.87				61.8098			rs		black
La2LiIrO6	La	Li	Ir	O	d	s	d	1.36	0.76	0.57	0.665	0.19	0.945092	0.931395	3	1	5	4	La3	Li1	Ir5	0		4	19.1773	5.39171	57	1.1	0.98	2.2						o		5.63	5.58	7.87				61.8098			rs?
La2LiIrO6	La	Li	Ir	O	d	s	d	1.36	0.76	0.57	0.665	0.19	0.945092	0.931395	3	1	5	4	La3	Li1	Ir5	0		4	19.1773	5.39171	57	1.1	0.98	2.2	ss	HP O2	800														rs
La2LiMoO6	La	Li	Mo	O	d	s	d	1.36	0.76	0.61	0.685	0.15	0.936026	0.922461	3	1	5	4	La3	Li1	Mo5	0		1	19.1773	5.39171	54.4167	1.1	0.98	2.16	ss	vacuum	273			m	P21/n	5.59	5.6932	7.878		90.26		62.6787			rs
La2LiMoO6	La	Li	Mo	O	d	s	d	1.36	0.76	0.61	0.685	0.15	0.936026	0.922461	3	1	5	4	La3	Li1	Mo5	0		1	19.1773	5.39171	54.4167	1.1	0.98	2.16	ss	vacuum/Ar	800			o		5.69	5.594	7.879				62.6969			rs?		dark blue
La2LiMoO6	La	Li	Mo	O	d	s	d	1.36	0.76	0.61	0.685	0.15	0.936026	0.922461	3	1	5	4	La3	Li1	Mo5	0		1	19.1773	5.39171	54.4167	1.1	0.98	2.16	ss	Ar	1100			m	P21/n	5.5939	5.6924	7.8803		90.26		62.7319		151.737	rs	1
La2LiNbO6	La	Li	Nb	O	d	s	d	1.36	0.76	0.64	0.7	0.12	0.92934	0.915872	3	1	5	4	La3	Li1	Nb5	0		0	19.1773	5.39171	50.5728	1.1	0.98	1.6						o		5.635	5.761	7.946				64.4882			rs?
La2LiOsO6	La	Li	Os	O	d	s	d	1.36	0.76	0.575	0.6675	0.185	0.943949	0.930269	3	1	5	4	La3	Li1	Os5	0		3	19.1773	5.39171	55	1.1	0.98	2.2	flux		625			m	P21/n	5.5603	5.6564	7.8662		90.147		61.8503		153.533	rs		black
La2LiOsO6	La	Li	Os	O	d	s	d	1.36	0.76	0.575	0.6675	0.185	0.943949	0.930269	3	1	5	4	La3	Li1	Os5	0		3	19.1773	5.39171	55	1.1	0.98	2.2						o		5.558	5.654	7.889				61.9778			rs?
La2LiReO6	La	Li	Re	O	d	s	d	1.36	0.76	0.58	0.67	0.18	0.942809	0.929145	3	1	5	4	La3	Li1	Re5	0		2	19.1773	5.39171	51.9	1.1	0.98	1.9	ss	vacuum/Ar	800			o		5.577	5.663	7.876				62.186			rs?		dark brown
La2LiReO6	La	Li	Re	O	d	s	d	1.36	0.76	0.58	0.67	0.18	0.942809	0.929145	3	1	5	4	La3	Li1	Re5	0		2	19.1773	5.39171	51.9	1.1	0.98	1.9	ss	Ar	900			m	P21/n	5.58262	5.67582	7.88586		90.24		62.4672		152.607	rs		black
La2LiRuO6	La	Li	Ru	O	d	s	d	1.36	0.76	0.565	0.6625	0.195	0.946237	0.932524	3	1	5	4	La3	Li1	Ru5	0		3	19.1773	5.39171	59	1.1	0.98	2.2	ss	HP O2	800			m	P21/n	5.5497	5.6084	7.8386		90.003		60.994		155	rs	0.97
La2LiRuO6	La	Li	Ru	O	d	s	d	1.36	0.76	0.565	0.6625	0.195	0.946237	0.932524	3	1	5	4	La3	Li1	Ru5	0		3	19.1773	5.39171	59	1.1	0.98	2.2	ss	air	1000			m	P21/n	5.5555	5.5977	7.8454		90.02		60.9941		155.1	rs	1
La2LiRuO6	La	Li	Ru	O	d	s	d	1.36	0.76	0.565	0.6625	0.195	0.946237	0.932524	3	1	5	4	La3	Li1	Ru5	0		3	19.1773	5.39171	59	1.1	0.98	2.2						o		5.561	5.597	7.847				61.0593			rs?
La2LiRuO6	La	Li	Ru	O	d	s	d	1.36	0.76	0.565	0.6625	0.195	0.946237	0.932524	3	1	5	4	La3	Li1	Ru5	0		3	19.1773	5.39171	59	1.1	0.98	2.2	ss	air	900														rs
La2LiSbO6	La	Li	Sb	O	d	s	p	1.36	0.76	0.6	0.68	0.16	0.938276	0.924678	3	1	5	4	La3	Li1	Sb5	0		10	19.1773	5.39171	55	1.1	0.98	2.05	ss	air	273			m	P21/n	5.6226	5.7199	7.9689		89.796		64.071			rs
La2LiSbO6	La	Li	Sb	O	d	s	p	1.36	0.76	0.6	0.68	0.16	0.938276	0.924678	3	1	5	4	La3	Li1	Sb5	0		10	19.1773	5.39171	55	1.1	0.98	2.05	ss		1100			m		4.017	3.984	4.017		91.1333		64.2744
La2LiTaO6	La	Li	Ta	O	d	s	d	1.36	0.76	0.64	0.7	0.12	0.92934	0.915872	3	1	5	4	La3	Li1	Ta5	0		0	19.1773	5.39171	48.272	1.1	0.98	1.5	ss	air	850			m		5.619	5.778	7.952		89.6		64.542			rs?
La2LiVO6	La	Li	V	O	d	s	d	1.36	0.76	0.54	0.65	0.22	0.952007	0.93821	3	1	5	4	La3	Li1	V5	0		0	19.1773	5.39171	65.2816	1.1	0.98	1.63	HP	O2	900			c	Fm-3m	7.746						58.0955			rs		yellow-orange
La2LiVO6	La	Li	V	O	d	s	d	1.36	0.76	0.54	0.65	0.22	0.952007	0.93821	3	1	5	4	La3	Li1	V5	0		0	19.1773	5.39171	65.2816	1.1	0.98	1.63	HP		900			c	Fm-3m	7.746						58.0955			rs		yellow-orange
La2LiVO6	La	Li	V	O	d	s	d	1.36	0.76	0.54	0.65	0.22	0.952007	0.93821	3	1	5	4	La3	Li1	V5	0		0	19.1773	5.39171	65.2816	1.1	0.98	1.63	HP	O2	900			c	Fm-3m	7.746						58.0955			rs		yellow-orange
La2MgGeO6	La	Mg	Ge	O	d	s	p	1.36	0.72	0.53	0.625	0.19	0.96376	0.949793	3	2	4	2	La3	Mg2	Ge4	0		10	19.1773	15.0353	45.7155	1.1	1.31	2.01	ss	air	1400			o		5.521	5.453	7.679				57.796
La2MgGeO6	La	Mg	Ge	O	d	s	p	1.36	0.72	0.53	0.625	0.19	0.96376	0.949793	3	2	4	2	La3	Mg2	Ge4	0		10	19.1773	15.0353	45.7155	1.1	1.31	2.01	ss	air	1400			r	R3	5.5125		13.3295				58.4643			rs
La2MgHfO6	La	Mg	Hf	O	d	s	d	1.36	0.72	0.71	0.715	0.01	0.922749	0.909376	3	2	4	2	La3	Mg2	Hf4	0		0	19.1773	15.0353	33.37	1.1	1.31	1.3	ss		1100			c		4.02						64.9648
La2MgHfO6	La	Mg	Hf	O	d	s	d	1.36	0.72	0.71	0.715	0.01	0.922749	0.909376	3	2	4	2	La3	Mg2	Hf4	0		0	19.1773	15.0353	33.37	1.1	1.31	1.3	solution		1500			m		5.6672	5.7666	8.0648		89.95		65.8903			rs	0.1
La2MgIrO6	La	Mg	Ir	O	d	s	d	1.36	0.72	0.625	0.6725	0.095	0.941672	0.928024	3	2	4	2	La3	Mg2	Ir4	0		5	19.1773	15.0353	40	1.1	1.31	2.2	ss	air	1500			m	P21/n	5.604	5.629	7.911		90.32		62.387			rs?
La2MgIrO6	La	Mg	Ir	O	d	s	d	1.36	0.72	0.625	0.6725	0.095	0.941672	0.928024	3	2	4	2	La3	Mg2	Ir4	0		5	19.1773	15.0353	40	1.1	1.31	2.2	ss	air/O2	1300			o		5.59	5.59	7.91				61.7931			rs
La2MgIrO6	La	Mg	Ir	O	d	s	d	1.36	0.72	0.625	0.6725	0.095	0.941672	0.928024	3	2	4	2	La3	Mg2	Ir4	0		5	19.1773	15.0353	40	1.1	1.31	2.2	ss		1150			c		7.92						62.0991					black
La2MgIrO6	La	Mg	Ir	O	d	s	d	1.36	0.72	0.625	0.6725	0.095	0.941672	0.928024	3	2	4	2	La3	Mg2	Ir4	0		5	19.1773	15.0353	40	1.1	1.31	2.2	ss	air	1100			m	P21/n	5.5856	5.6246	7.907		90.03		62.1031			rs	1
La2MgIrO6	La	Mg	Ir	O	d	s	d	1.36	0.72	0.625	0.6725	0.095	0.941672	0.928024	3	2	4	2	La3	Mg2	Ir4	0		5	19.1773	15.0353	40	1.1	1.31	2.2	ss	HP O3	950			o		5.629	5.591	7.914				62.2668					black
La2MgIrO6	La	Mg	Ir	O	d	s	d	1.36	0.72	0.625	0.6725	0.095	0.941672	0.928024	3	2	4	2	La3	Mg2	Ir4	0		5	19.1773	15.0353	40	1.1	1.31	2.2	ss	air	1150			o		5.629	5.591	7.914				62.2668			rs	1
La2MgIrO6	La	Mg	Ir	O	d	s	d	1.36	0.72	0.625	0.6725	0.095	0.941672	0.928024	3	2	4	2	La3	Mg2	Ir4	0		5	19.1773	15.0353	40	1.1	1.31	2.2	ss	O2	950														rs
La2MgMnO6	La	Mg	Mn	O	d	s	d	1.36	0.72	0.53	0.625	0.19	0.96376	0.949793	3	2	4	2	La3	Mg2	Mn4	0		3	19.1773	15.0353	51.2	1.1	1.31	1.55	ss	air	273			r/m	R-3 / P21/c	5.5132 / 5.6656	5.2672	13.3391 / 7.8767		91.493		58.7439			rs
La2MgMnO6	La	Mg	Mn	O	d	s	d	1.36	0.72	0.53	0.625	0.19	0.96376	0.949793	3	2	4	2	La3	Mg2	Mn4	0		3	19.1773	15.0353	51.2	1.1	1.31	1.55	ss	O2	1500			r/m	R-3	5.5109		13.2861				58.2401			rs
La2MgMnO6	La	Mg	Mn	O	d	s	d	1.36	0.72	0.53	0.625	0.19	0.96376	0.949793	3	2	4	2	La3	Mg2	Mn4	0		3	19.1773	15.0353	51.2	1.1	1.31	1.55	ss		1100			c		3.882						58.5014
La2MgPtO6	La	Mg	Pt	O	d	s	d	1.36	0.72	0.625	0.6725	0.095	0.941672	0.928024	3	2	4	2	La3	Mg2	Pt4	0		6	19.1773	15.0353	43	1.1	1.31	2.28	ss		1100			m	P21/n	5.5919	5.6277	7.914		90		62.2625		145.767	rs	0.995
La2MgRhO6	La	Mg	Rh	O	d	s	d	1.36	0.72	0.6	0.66	0.12	0.947386	0.933656	3	2	4	2	La3	Mg2	Rh4	0		5	19.1773	15.0353	42	1.1	1.31	2.28	ss	O2	1100			m	P21/n	5.579	5.615	7.898		90.01		61.8534			rs
La2MgRuO6	La	Mg	Ru	O	d	s	d	1.36	0.72	0.62	0.67	0.1	0.942809	0.929145	3	2	4	2	La3	Mg2	Ru4	0		4	19.1773	15.0353	45	1.1	1.31	2.2	flux		1320			c		7.91						61.8642					black
La2MgRuO6	La	Mg	Ru	O	d	s	d	1.36	0.72	0.62	0.67	0.1	0.942809	0.929145	3	2	4	2	La3	Mg2	Ru4	0		4	19.1773	15.0353	45	1.1	1.31	2.2	sol-gel	air	1150			m	P21/n	5.606	7.898	5.592		90.08		61.8981			rs
La2MgRuO6	La	Mg	Ru	O	d	s	d	1.36	0.72	0.62	0.67	0.1	0.942809	0.929145	3	2	4	2	La3	Mg2	Ru4	0		4	19.1773	15.0353	45	1.1	1.31	2.2	ss	air	1150			m	P21/n	5.5839	5.5995	7.8946		90.037		61.7102		155.333	rs	0.97
La2MgRuO6	La	Mg	Ru	O	d	s	d	1.36	0.72	0.62	0.67	0.1	0.942809	0.929145	3	2	4	2	La3	Mg2	Ru4	0		4	19.1773	15.0353	45	1.1	1.31	2.2																	d?
La2MgRuO6	La	Mg	Ru	O	d	s	d	1.36	0.72	0.62	0.67	0.1	0.942809	0.929145	3	2	4	2	La3	Mg2	Ru4	0		4	19.1773	15.0353	45	1.1	1.31	2.2
La2MgSnO6	La	Mg	Sn	O	d	s	p	1.36	0.72	0.69	0.705	0.03	0.927133	0.913696	3	2	4	2	La3	Mg2	Sn4	0		10	19.1773	15.0353	40.735	1.1	1.31	1.96	ss		1100			c		3.996						63.8082
La2MgSnO6	La	Mg	Sn	O	d	s	p	1.36	0.72	0.69	0.705	0.03	0.927133	0.913696	3	2	4	2	La3	Mg2	Sn4	0		10	19.1773	15.0353	40.735	1.1	1.31	1.96	ss		1600			m	P21/n	5.6387	5.725	8.0219		90.085		64.7398			rs	0.92
La2MgTiO6	La	Mg	Ti	O	d	s	d	1.36	0.72	0.605	0.6625	0.115	0.946237	0.932524	3	2	4	2	La3	Mg2	Ti4	0		0	19.1773	15.0353	43.2672	1.1	1.31	1.54	ss		1100			c		3.922						60.3285
La2MgTiO6	La	Mg	Ti	O	d	s	d	1.36	0.72	0.605	0.6625	0.115	0.946237	0.932524	3	2	4	2	La3	Mg2	Ti4	0		0	19.1773	15.0353	43.2672	1.1	1.31	1.54	ss		1600
La2MgZrO6	La	Mg	Zr	O	d	s	d	1.36	0.72	0.72	0.72	0	0.920573	0.907231	3	2	4	2	La3	Mg2	Zr4	0		0	19.1773	15.0353	34.4184	1.1	1.31	1.33						?		4.05						66.4301
La2MnIrO6	La	Mn	Ir	O	d	d	d	1.36	0.645	0.68	0.6625	0.035	0.946237	0.932524	3	3	3	0	La3	Mn3	Ir3	0	4	6	19.1773	33.668	28	1.1	1.55	2.2	HP		1100			o		5.53	5.53	7.82				59.7857			rs
La2MnIrO6	La	Mn	Ir	O	d	d	d	1.36	0.645	0.68	0.6625	0.035	0.946237	0.932524	3	3	3	0	La3	Mn3	Ir3	0	4	6	19.1773	33.668	28	1.1	1.55	2.2	ss		1150			c		7.86						60.6985					black
La2MnRhO6	La	Mn	Rh	O	d	d	d	1.36	0.645	0.665	0.655	0.02	0.949691	0.935927	3	3	3	0	La3	Mn3	Rh3	0	4	6	19.1773	33.668	31.06	1.1	1.55	2.28	ss	air	1000			o	Pnma	5.589	7.83	5.546				60.6758		153.667	d	0
La2MnRhO6	La	Mn	Rh	O	d	d	d	1.36	0.645	0.665	0.655	0.02	0.949691	0.935927	3	3	3	0	La3	Mn3	Rh3	0	4	6	19.1773	33.668	31.06	1.1	1.55	2.28	ss	air	1000			o	Pnma	5.589	7.83	5.546				60.6758		153.667	d	0
La2MnRhO6	La	Mn	Rh	O	d	d	d	1.36	0.645	0.665	0.655	0.02	0.949691	0.935927	3	3	3	0	La3	Mn3	Rh3	0	4	6	19.1773	33.668	31.06	1.1	1.55	2.28	ss	O2	1100			o	Pnma	5.582	7.845	5.553				60.7926			d	0
La2MnRhO6	La	Mn	Rh	O	d	d	d	1.36	0.645	0.665	0.655	0.02	0.949691	0.935927	3	3	3	0	La3	Mn3	Rh3	0	4	6	19.1773	33.668	31.06	1.1	1.55	2.28	ss	O2	1300			o	Pbnm	5.552	5.5966	7.8502				60.981			d	0
La2MnRhO6	La	Mn	Rh	O	d	d	d	1.36	0.645	0.665	0.655	0.02	0.949691	0.935927	3	3	3	0	La3	Mn3	Rh3	0	4	6	19.1773	33.668	31.06	1.1	1.55	2.28	ss	air	1100			o		5.555	5.599	7.852				61.0541			d	0	black
La2MnRuO6	La	Mn	Ru	O	d	d	d	1.36	0.645	0.68	0.6625	0.035	0.946237	0.932524	3	3	3	0	La3	Mn3	Ru3	0	4	5	19.1773	33.668	28.47	1.1	1.55	2.2	sol-gel	Ar	1100			o	Pbnm	5.566	5.648	7.861				61.7811			d	0
La2MnRuO6	La	Mn	Ru	O	d	d	d	1.36	0.645	0.68	0.6625	0.035	0.946237	0.932524	3	3	3	0	La3	Mn3	Ru3	0	4	5	19.1773	33.668	28.47	1.1	1.55	2.2	ss	O2	1200			o	Pbnm										d	0
La2MnRuO6	La	Mn	Ru	O	d	d	d	1.36	0.645	0.68	0.6625	0.035	0.946237	0.932524	3	3	3	0	La3	Mn3	Ru3	0	4	5	19.1773	33.668	28.47	1.1	1.55	2.2	ss		1150			c		7.84						60.2363					black
La2MnRuO6	La	Mn	Ru	O	d	d	d	1.36	0.645	0.68	0.6625	0.035	0.946237	0.932524	3	3	3	0	La3	Mn3	Ru3	0	4	5	19.1773	33.668	28.47	1.1	1.55	2.2	ss	air	1200			o	Pnma	5.5593	7.8309	5.5484				60.3865		155	d	0	black
La2MnRuO6	La	Mn	Ru	O	d	d	d	1.36	0.645	0.68	0.6625	0.035	0.946237	0.932524	3	3	3	0	La3	Mn3	Ru3	0	4	5	19.1773	33.668	28.47	1.1	1.55	2.2	ss	Ar	1200			o	Pnma	5.6913	7.8355	5.55				61.8744		153.333	d	0	black
La2MnTiO6	La	Mn	Ti	O	d	d	d	1.36	0.83	0.605	0.7175	0.225	0.92166	0.908302	3	2	4	2	La3	Mn2	Ti4	0	5	0	19.1773	15.64	43.2672	1.1	1.55	1.54	ss	H2/Ar	273			o		5.71	7.94788	5.6				63.5354			d
La2MnVO6	La	Mn	V	O	d	d	d	1.36	0.83	0.58	0.705	0.25	0.927133	0.913696	3	2	4	2	La3	Mn2	V4	0	5	1	19.1773	15.64	46.709	1.1	1.55	1.63	arc melt	Ar				c	Fm-3m	7.9073						61.8009			rs	?
La2MnVO6	La	Mn	V	O	d	d	d	1.36	0.83	0.58	0.705	0.25	0.927133	0.913696	3	2	4	2	La3	Mn2	V4	0	5	1	19.1773	15.64	46.709	1.1	1.55	1.63	ss	H2/Ar	1125			o	Pnma	5.6158	7.8807	5.5633				61.553			d	0
La2NaIrO6	La	Na	Ir	O	d	s	d	1.36	1.02	0.57	0.795	0.45	0.889118	0.876233	3	1	5	4	La3	Na1	Ir5	0		4	19.1773	5.13908	57	1.1	0.93	2.2	flux		700			m	P21/n	5.5959	5.9499	8.0213		90.425		66.7656		145.633	rs
La2NaOsO6	La	Na	Os	O	d	s	d	1.36	1.02	0.575	0.7975	0.445	0.888107	0.875236	3	1	5	4	La3	Na1	Os5	0		3	19.1773	5.13908	55	1.1	0.93	2.2	flux		600			m	P21/n	5.6054	5.9445	8.0085		90.587		66.7099		145.32	rs	1	black
La2NaOsO6	La	Na	Os	O	d	s	d	1.36	1.02	0.575	0.7975	0.445	0.888107	0.875236	3	1	5	4	La3	Na1	Os5	0		3	19.1773	5.13908	55	1.1	0.93	2.2	ss	air	900			m	P21/n	5.6284	5.9248	8.0603		90.413		67.1953			rs	1
La2NaRuO6	La	Na	Ru	O	d	s	d	1.36	1.02	0.565	0.7925	0.455	0.890132	0.877232	3	1	5	4	La3	Na1	Ru5	0		3	19.1773	5.13908	59	1.1	0.93	2.2	flux		600			m	P21/n	5.5903	5.9241	7.999		90.495		66.2242		145.997	rs	1	black
La2NaRuO6	La	Na	Ru	O	d	s	d	1.36	1.02	0.565	0.7925	0.455	0.890132	0.877232	3	1	5	4	La3	Na1	Ru5	0		3	19.1773	5.13908	59	1.1	0.93	2.2	ss	air	900			m	P21/n	5.6084	5.9107	8.019		90.348		66.4554			rs	1
La2NaTaO6	La	Na	Ta	O	d	s	d	1.36	1.02	0.64	0.83	0.38	0.875164	0.86248	3	1	5	4	La3	Na1	Ta5	0		0	19.1773	5.13908	48.272	1.1	0.93	1.5	flux		600			m	P21/n	5.6904	5.9824	8.1423		90.865		69.2877		142.993	rs
La2NiCoO6	La	Ni	Co	O	d	d	d	1.36	0.6	0.61	0.605	0.01	0.973374	0.959267	3	3	3	0	La3	Ni3	Co3	0	7	6	19.1773	35.187	33.5	1.1	1.91	1.88	ss	air	1300			r	R-3c										d	0
La2NiCoO6	La	Ni	Co	O	d	d	d	1.36	0.69	0.53	0.61	0.16	0.970953	0.956881	3	2	4	2	La3	Ni2	Co4	0	8	5	19.1773	18.1688	51.27	1.1	1.91	1.88	ss	air	1400			r	R-3c	5.369			61.17			56.159			d	0	black
La2NiFeO6	La	Ni	Fe	O	d	d	d	1.36	0.69	0.585	0.6375	0.105	0.957848	0.943966	3	2	4	2	La3	Ni2	Fe4	0	8	4	19.1773	18.1688	54.91	1.1	1.91	1.83	ss	air	273			o/r	Pbnm/R3-c	5.5181/5.5175	5.4685/5.5175	7.7509/13.274				58.4723			d
La2NiFeO6	La	Ni	Fe	O	d	d	d	1.36	0.69	0.585	0.6375	0.105	0.957848	0.943966	3	2	4	2	La3	Ni2	Fe4	0	8	4	19.1773	18.1688	54.91	1.1	1.91	1.83	sol-gel	air	900			r/o											d	0
La2NiGeO6	La	Ni	Ge	O	d	d	p	1.36	0.69	0.53	0.61	0.16	0.970953	0.956881	3	2	4	2	La3	Ni2	Ge4	0	8	10	19.1773	18.1688	45.7155	1.1	1.91	2.01	ss	air	1650			te		5.516		7.601				57.8175					black
La2NiIrO6	La	Ni	Ir	O	d	d	d	1.36	0.69	0.625	0.6575	0.065	0.948537	0.93479	3	2	4	2	La3	Ni2	Ir4	0	8	5	19.1773	18.1688	40	1.1	1.91	2.2	ss	air	1500			m	P21/n	5.575	5.626	7.896		90.21		61.914			rs?
La2NiIrO6	La	Ni	Ir	O	d	d	d	1.36	0.69	0.625	0.6575	0.065	0.948537	0.93479	3	2	4	2	La3	Ni2	Ir4	0	8	5	19.1773	18.1688	40	1.1	1.91	2.2	ss	air/O2	1300			o		5.57	5.57	7.88				61.1191			rs
La2NiIrO6	La	Ni	Ir	O	d	d	d	1.36	0.69	0.625	0.6575	0.065	0.948537	0.93479	3	2	4	2	La3	Ni2	Ir4	0	8	5	19.1773	18.1688	40	1.1	1.91	2.2	flux		1300			c		7.9						61.6299					black
La2NiIrO6	La	Ni	Ir	O	d	d	d	1.36	0.69	0.625	0.6575	0.065	0.948537	0.93479	3	2	4	2	La3	Ni2	Ir4	0	8	5	19.1773	18.1688	40	1.1	1.91	2.2	ss	air	975			m	P21/n	5.5752	5.626	7.898		90.02		61.9323			rs	1
La2NiIrO6	La	Ni	Ir	O	d	d	d	1.36	0.69	0.625	0.6575	0.065	0.948537	0.93479	3	2	4	2	La3	Ni2	Ir4	0	8	5	19.1773	18.1688	40	1.1	1.91	2.2	ss	air	1200			~c		7.918						62.0521			rs
La2NiMnO6	La	Ni	Mn	O	d	d	d	1.36	0.69	0.53	0.61	0.16	0.970953	0.956881	3	2	4	2	La3	Ni2	Mn4	0	8	3	19.1773	18.1688	51.2	1.1	1.91	1.55	ss						P21/n & R-3	5.5148	5.4616	7.7415		89.899		58.1615		160.833	rs
La2NiMnO6	La	Ni	Mn	O	d	d	d	1.36	0.69	0.53	0.61	0.16	0.970953	0.956881	3	2	4	2	La3	Ni2	Mn4	0	8	3	19.1773	18.1688	51.2	1.1	1.91	1.55	ss	air	273			m	P21/n	5.5115	5.4581	7.7387		90.015		58.1995			rs	1
La2NiMnO6	La	Ni	Mn	O	d	d	d	1.36	0.69	0.53	0.61	0.16	0.970953	0.956881	3	2	4	2	La3	Ni2	Mn4	0	8	3	19.1773	18.1688	51.2	1.1	1.91	1.55	sol-gel	air	1300			m	P21/n	5.514	5.46	7.74		89.93		58.2559		162.567	rs
La2NiMnO6	La	Ni	Mn	O	d	d	d	1.36	0.69	0.53	0.61	0.16	0.970953	0.956881	3	2	4	2	La3	Ni2	Mn4	0	8	3	19.1773	18.1688	51.2	1.1	1.91	1.55	sol-gel	Ar	1350			m	P21/n	5.517	7.748	5.466		90.01		58.412			rs		gray-black
La2NiMnO6	La	Ni	Mn	O	d	d	d	1.36	0.69	0.53	0.61	0.16	0.970953	0.956881	3	2	4	2	La3	Ni2	Mn4	0	8	3	19.1773	18.1688	51.2	1.1	1.91	1.55	nitrate decomp	air	900														rs	0.9
La2NiMnO6	La	Ni	Mn	O	d	d	d	1.36	0.69	0.53	0.61	0.16	0.970953	0.956881	3	2	4	2	La3	Ni2	Mn4	0	8	3	19.1773	18.1688	51.2	1.1	1.91	1.55	ss	air	1000			m	P21/n	5.41	5.478	7.667		89.98		56.8048		153.8	rs	0.8
La2NiMnO6	La	Ni	Mn	O	d	d	d	1.36	0.69	0.53	0.61	0.16	0.970953	0.956881	3	2	4	2	La3	Ni2	Mn4	0	8	3	19.1773	18.1688	51.2	1.1	1.91	1.55	sol-gel	air	1300			r		5.428			60.9			57.6895
La2NiMnO6	La	Ni	Mn	O	d	d	d	1.36	0.69	0.53	0.61	0.16	0.970953	0.956881	3	2	4	2	La3	Ni2	Mn4	0	8	3	19.1773	18.1688	51.2	1.1	1.91	1.55	nitrate decomp					o	Pnma	5.439	7.737	5.493				57.7885			rs?
La2NiMnO6	La	Ni	Mn	O	d	d	d	1.36	0.69	0.53	0.61	0.16	0.970953	0.956881	3	2	4	2	La3	Ni2	Mn4	0	8	3	19.1773	18.1688	51.2	1.1	1.91	1.55	nitrates	O2	1300			m	P21/c?	5.5	5.45	7.73575				57.9698		149	rs?
La2NiMnO6	La	Ni	Mn	O	d	d	d	1.36	0.69	0.53	0.61	0.16	0.970953	0.956881	3	2	4	2	La3	Ni2	Mn4	0	8	3	19.1773	18.1688	51.2	1.1	1.91	1.55	ss	air	1400			r		5.446	5.507	7.735				57.9953
La2NiMnO6	La	Ni	Mn	O	d	d	d	1.36	0.69	0.53	0.61	0.16	0.970953	0.956881	3	2	4	2	La3	Ni2	Mn4	0	8	3	19.1773	18.1688	51.2	1.1	1.91	1.55	sol-gel	air/O2/Ar	1400			r/o	R-3 / P21/n	5.50 / 5.50	5.45	13.24 / 7.74				58.0016		162	rs	<1?
La2NiMnO6	La	Ni	Mn	O	d	d	d	1.36	0.69	0.53	0.61	0.16	0.970953	0.956881	3	2	4	2	La3	Ni2	Mn4	0	8	3	19.1773	18.1688	51.2	1.1	1.91	1.55	nitrate decomp	air	1100			m	P21/n	5.46704	5.51048	7.75124		90.1199		58.3784			rs	0.85
La2NiMnO6	La	Ni	Mn	O	d	d	d	1.36	0.69	0.53	0.61	0.16	0.970953	0.956881	3	2	4	2	La3	Ni2	Mn4	0	8	3	19.1773	18.1688	51.2	1.1	1.91	1.55	ss	air	1150			m	P21/n	5.5099	5.4562	7.7703		89.82		58.3996		160.4	rs	1
La2NiMnO6	La	Ni	Mn	O	d	d	d	1.36	0.69	0.53	0.61	0.16	0.970953	0.956881	3	2	4	2	La3	Ni2	Mn4	0	8	3	19.1773	18.1688	51.2	1.1	1.91	1.55	ss		1100			c		3.88						58.4111
La2NiMnO6	La	Ni	Mn	O	d	d	d	1.36	0.69	0.53	0.61	0.16	0.970953	0.956881	3	2	4	2	La3	Ni2	Mn4	0	8	3	19.1773	18.1688	51.2	1.1	1.91	1.55	sol-gel	air	400			o		5.5	5.65	7.78				60.4409
La2NiMnO6	La	Ni	Mn	O	d	d	d	1.36	0.69	0.53	0.61	0.16	0.970953	0.956881	3	2	4	2	La3	Ni2	Mn4	0	8	3	19.1773	18.1688	51.2	1.1	1.91	1.55	sol-gel	air or Ar	1000			m	P21/n or R-3c & Pbnm										rs	0.84
La2NiPtO6	La	Ni	Pt	O	d	d	d	1.36	0.69	0.625	0.6575	0.065	0.948537	0.93479	3	2	4	2	La3	Ni2	Pt4	0	8	6	19.1773	18.1688	43	1.1	1.91	2.28	ss		1100			m	P21/n	5.5741	5.6304	7.8973		90		61.963		148.533	rs	0.966
La2NiRhO6	La	Ni	Rh	O	d	d	d	1.36	0.69	0.6	0.645	0.09	0.954335	0.940504	3	2	4	2	La3	Ni2	Rh4	0	8	5	19.1773	18.1688	42	1.1	1.91	2.28	ss	O2	1275			o		5.546	5.541	7.845				60.27			d	0	black
La2NiRhO6	La	Ni	Rh	O	d	d	d	1.36	0.69	0.6	0.645	0.09	0.954335	0.940504	3	2	4	2	La3	Ni2	Rh4	0	8	5	19.1773	18.1688	42	1.1	1.91	2.28	ss	air	1100			o	Pnma	5.58	7.846	5.554				60.7895			d	0
La2NiRhO6	La	Ni	Rh	O	d	d	d	1.36	0.69	0.6	0.645	0.09	0.954335	0.940504	3	2	4	2	La3	Ni2	Rh4	0	8	5	19.1773	18.1688	42	1.1	1.91	2.28	ss	O2	1275			o	Pbnm	5.5444	5.5661	7.8383				60.4738			d	0	black
La2NiRuO6	La	Ni	Ru	O	d	d	d	1.36	0.69	0.62	0.655	0.07	0.949691	0.935927	3	2	4	2	La3	Ni2	Ru4	0	8	4	19.1773	18.1688	45	1.1	1.91	2.2	ss					m	P21/n	5.5643	5.5954	7.8705		89.99		61.261		154	rs
La2NiRuO6	La	Ni	Ru	O	d	d	d	1.36	0.69	0.62	0.655	0.07	0.949691	0.935927	3	2	4	2	La3	Ni2	Ru4	0	8	4	19.1773	18.1688	45	1.1	1.91	2.2	sol-gel	air	1150			m	P21/n	5.613	7.883	5.571		90.04		61.6254			rs
La2NiRuO6	La	Ni	Ru	O	d	d	d	1.36	0.69	0.62	0.655	0.07	0.949691	0.935927	3	2	4	2	La3	Ni2	Ru4	0	8	4	19.1773	18.1688	45	1.1	1.91	2.2	flux		1300			c		7.9						61.6299					black
La2NiRuO6	La	Ni	Ru	O	d	d	d	1.36	0.69	0.62	0.655	0.07	0.949691	0.935927	3	2	4	2	La3	Ni2	Ru4	0	8	4	19.1773	18.1688	45	1.1	1.91	2.2	ss	air	1150			o	Pbnm	5.5675	5.5952	7.8734				61.3166			d	0
La2NiRuO6	La	Ni	Ru	O	d	d	d	1.36	0.69	0.62	0.655	0.07	0.949691	0.935927	3	2	4	2	La3	Ni2	Ru4	0	8	4	19.1773	18.1688	45	1.1	1.91	2.2	ss	air	1150			m	P21/n	5.5633	5.6063	7.8728		89.99		61.3872		151.667	rs	0.9
La2NiRuO6	La	Ni	Ru	O	d	d	d	1.36	0.69	0.62	0.655	0.07	0.949691	0.935927	3	2	4	2	La3	Ni2	Ru4	0	8	4	19.1773	18.1688	45	1.1	1.91	2.2	ss	capsule	1400			m	P21/n	5.5688	5.5984	7.8764		90.18		61.3891			rs	1
La2NiRuO6	La	Ni	Ru	O	d	d	d	1.36	0.69	0.62	0.655	0.07	0.949691	0.935927	3	2	4	2	La3	Ni2	Ru4	0	8	4	19.1773	18.1688	45	1.1	1.91	2.2																	d?
La2NiRuO6	La	Ni	Ru	O	d	d	d	1.36	0.69	0.62	0.655	0.07	0.949691	0.935927	3	2	4	2	La3	Ni2	Ru4	0	8	4	19.1773	18.1688	45	1.1	1.91	2.2
La2NiSnO6	La	Ni	Sn	O	d	d	p	1.36	0.69	0.69	0.69	0	0.933787	0.920254	3	2	4	2	La3	Ni2	Sn4	0	8	10	19.1773	18.1688	40.735	1.1	1.91	1.96	ss		1500			r		7.985			89.6667			63.6407
La2NiTiO6	La	Ni	Ti	O	d	d	d	1.36	0.69	0.605	0.6475	0.085	0.95317	0.939356	3	2	4	2	La3	Ni2	Ti4	0	8	0	19.1773	18.1688	43.2672	1.1	1.91	1.54	ss	air	1100			c?		7.83						60.0061
La2NiTiO6	La	Ni	Ti	O	d	d	d	1.36	0.69	0.605	0.6475	0.085	0.95317	0.939356	3	2	4	2	La3	Ni2	Ti4	0	8	0	19.1773	18.1688	43.2672	1.1	1.91	1.54	sol-gel	air	800			o	Pbnm	5.517	5.55	7.856				60.1364		164.6	d	0
La2NiTiO6	La	Ni	Ti	O	d	d	d	1.36	0.69	0.605	0.6475	0.085	0.95317	0.939356	3	2	4	2	La3	Ni2	Ti4	0	8	0	19.1773	18.1688	43.2672	1.1	1.91	1.54	ss	air	273			m	P21/n	5.5502	5.5593	7.8419		90.003		60.4909			rs	0.84
La2NiTiO6	La	Ni	Ti	O	d	d	d	1.36	0.69	0.605	0.6475	0.085	0.95317	0.939356	3	2	4	2	La3	Ni2	Ti4	0	8	0	19.1773	18.1688	43.2672	1.1	1.91	1.54	ss	air	1000			c		7.812						59.5932
La2NiTiO6	La	Ni	Ti	O	d	d	d	1.36	0.69	0.605	0.6475	0.085	0.95317	0.939356	3	2	4	2	La3	Ni2	Ti4	0	8	0	19.1773	18.1688	43.2672	1.1	1.91	1.54	ss		1100			c		3.918						60.1441
La2NiTiO6	La	Ni	Ti	O	d	d	d	1.36	0.69	0.605	0.6475	0.085	0.95317	0.939356	3	2	4	2	La3	Ni2	Ti4	0	8	0	19.1773	18.1688	43.2672	1.1	1.91	1.54	sol-gel	air	900			m	P21/n	5.5545	5.5512	7.8341		90.08		60.3894		157.367	rs	0.72
La2NiTiO6	La	Ni	Ti	O	d	d	d	1.36	0.69	0.605	0.6475	0.085	0.95317	0.939356	3	2	4	2	La3	Ni2	Ti4	0	8	0	19.1773	18.1688	43.2672	1.1	1.91	1.54	ss	air	1650			c		7.856						60.6058					black
La2NiVO6	La	Ni	V	O	d	d	d	1.36	0.69	0.58	0.635	0.11	0.959024	0.945126	3	2	4	2	La3	Ni2	V4	0	8	1	19.1773	18.1688	46.709	1.1	1.91	1.63	ss + arc melt	vacuum	1175			o	Pnma	5.52182	7.80614	5.52584				59.5466		?	d	0
La2NiVO6	La	Ni	V	O	d	d	d	1.36	0.69	0.58	0.635	0.11	0.959024	0.945126	3	2	4	2	La3	Ni2	V4	0	8	1	19.1773	18.1688	46.709	1.1	1.91	1.63	ss	vacuum	1050			o		5.5309	7.8043	5.5153				59.5167					black
La2NiZrO6	La	Ni	Zr	O	d	d	d	1.36	0.69	0.72	0.705	0.03	0.927133	0.913696	3	2	4	2	La3	Ni2	Zr4	0	8	0	19.1773	18.1688	34.4184	1.1	1.91	1.33	ss		1500			r		7.994			89.55			63.8561
La2ScMnO6	La	Sc	Mn	O	d	d	d	1.36	0.745	0.645	0.695	0.1	0.931558	0.918057	3	3	3	0	La3	Sc3	Mn3	0	0	4	19.1773	24.7568	33.668	1.1	1.36	1.55	ss	Ar	1450			o	Pbnm	5.605	5.73	7.957				63.888			d	0	gray-black
La2ZnHfO6	La	Zn	Hf	O	d	d	d	1.36	0.74	0.71	0.725	0.03	0.918407	0.905097	3	2	4	2	La3	Zn2	Hf4	0	10	0	19.1773	17.9644	33.37	1.1	1.65	1.3	ss		1100			?		4						64
La2ZnIrO6	La	Zn	Ir	O	d	d	d	1.36	0.74	0.625	0.6825	0.115	0.93715	0.923568	3	2	4	2	La3	Zn2	Ir4	0	10	5	19.1773	17.9644	40	1.1	1.65	2.2	ss	air	1500			m	P21/n	5.595	5.683	7.937		90.01		63.092			rs
La2ZnIrO6	La	Zn	Ir	O	d	d	d	1.36	0.74	0.625	0.6825	0.115	0.93715	0.923568	3	2	4	2	La3	Zn2	Ir4	0	10	5	19.1773	17.9644	40	1.1	1.65	2.2	ss	HP O4	950			o		5.532	5.572	7.842				60.431					black
La2ZnIrO6	La	Zn	Ir	O	d	d	d	1.36	0.74	0.625	0.6825	0.115	0.93715	0.923568	3	2	4	2	La3	Zn2	Ir4	0	10	5	19.1773	17.9644	40	1.1	1.65	2.2	ss	air	1200			m	P21/n	5.5902	5.693	7.9335		90		63.1209			rs
La2ZnIrO6	La	Zn	Ir	O	d	d	d	1.36	0.74	0.625	0.6825	0.115	0.93715	0.923568	3	2	4	2	La3	Zn2	Ir4	0	10	5	19.1773	17.9644	40	1.1	1.65	2.2	ss	air	975			m	P21/n	5.5986	5.6869	7.9405		89.99		63.2038			rs	1
La2ZnIrO6	La	Zn	Ir	O	d	d	d	1.36	0.74	0.625	0.6825	0.115	0.93715	0.923568	3	2	4	2	La3	Zn2	Ir4	0	10	5	19.1773	17.9644	40	1.1	1.65	2.2	ss	air	1100			o		5.702	5.593	7.935				63.2643			rs	1
La2ZnMnO6	La	Zn	Mn	O	d	d	d	1.36	0.74	0.53	0.635	0.21	0.959024	0.945126	3	2	4	2	La3	Zn2	Mn4	0	10	3	19.1773	17.9644	51.2	1.1	1.65	1.55	sol-gel	air	800			m	P21/n	5.5407	5.512	7.8009		89.929		59.5605		158.45	rs	0.7	dark green
La2ZnPtO6	La	Zn	Pt	O	d	d	d	1.36	0.74	0.625	0.6825	0.115	0.93715	0.923568	3	2	4	2	La3	Zn2	Pt4	0	10	6	19.1773	17.9644	43	1.1	1.65	2.28	ss		1000			m	P21/n	5.5944	5.6879	7.9351		90		63.1245		145.867	rs	1
La2ZnRhO6	La	Zn	Rh	O	d	d	d	1.36	0.74	0.6	0.67	0.14	0.942809	0.929145	3	2	4	2	La3	Zn2	Rh4	0	10	5	19.1773	17.9644	42	1.1	1.65	2.28	ss	O2	1100			m	P21/n	5.584	5.659	7.914		90		62.5203			rs
La2ZnRuO6	La	Zn	Ru	O	d	d	d	1.36	0.74	0.62	0.68	0.12	0.938276	0.924678	3	2	4	2	La3	Zn2	Ru4	0	10	4	19.1773	17.9644	45	1.1	1.65	2.2	sol-gel	air	1025			m	P21/n	5.684	7.921	5.594		90.03		62.9646			rs
La2ZnRuO6	La	Zn	Ru	O	d	d	d	1.36	0.74	0.62	0.68	0.12	0.938276	0.924678	3	2	4	2	La3	Zn2	Ru4	0	10	4	19.1773	17.9644	45	1.1	1.65	2.2	ss	air	1050			m	P21/n	5.5963	5.6579	7.9223		90.014		62.7115		152.333	rs	0.97
La2ZnRuO6	La	Zn	Ru	O	d	d	d	1.36	0.74	0.62	0.68	0.12	0.938276	0.924678	3	2	4	2	La3	Zn2	Ru4	0	10	4	19.1773	17.9644	45	1.1	1.65	2.2	ss	air	1150			m	P21/n	5.5924	5.669	7.9184		90.02		62.7599			rs	1
La2ZnRuO6	La	Zn	Ru	O	d	d	d	1.36	0.74	0.62	0.68	0.12	0.938276	0.924678	3	2	4	2	La3	Zn2	Ru4	0	10	4	19.1773	17.9644	45	1.1	1.65	2.2	flux		1300			c		7.97						63.2827					black
La2ZnRuO6	La	Zn	Ru	O	d	d	d	1.36	0.74	0.62	0.68	0.12	0.938276	0.924678	3	2	4	2	La3	Zn2	Ru4	0	10	4	19.1773	17.9644	45	1.1	1.65	2.2																	d?
La2ZnRuO6	La	Zn	Ru	O	d	d	d	1.36	0.74	0.62	0.68	0.12	0.938276	0.924678	3	2	4	2	La3	Zn2	Ru4	0	10	4	19.1773	17.9644	45	1.1	1.65	2.2
La2ZnTiO6	La	Zn	Ti	O	d	d	d	1.36	0.74	0.605	0.6725	0.135	0.941672	0.928024	3	2	4	2	La3	Zn2	Ti4	0	10	0	19.1773	17.9644	43.2672	1.1	1.65	1.54	ss	air	1100			c?		7.89						61.3961
La2ZnTiO6	La	Zn	Ti	O	d	d	d	1.36	0.74	0.605	0.6725	0.135	0.941672	0.928024	3	2	4	2	La3	Zn2	Ti4	0	10	0	19.1773	17.9644	43.2672	1.1	1.65	1.54	ss	air	1000			c		7.876						61.0699
Lu2CoMnO6	Lu	Co	Mn	O	f	d	d		0.745	0.53	0.6375	0.215	0.485865	0	3	2	4	2	Lu3	Co2	Mn4	0	7	3	20.959	17.0844	51.2	1.27	1.88	1.55	sol-gel	air	1200			m	P21/n	5.1638	5.5467	7.4153		89.665		53.0964		143.367	rs	0.84
Lu2CoMnO6	Lu	Co	Mn	O	f	d	d		0.745	0.53	0.6375	0.215	0.485865	0	3	2	4	2	Lu3	Co2	Mn4	0	7	3	20.959	17.0844	51.2	1.27	1.88	1.55	nitrates	O2	1300			m	P21/c?	5.15	5.54	7.41048				52.8571		134	rs?
Lu2CuTiO6	Lu	Cu	Ti	O	f	d	d		0.73	0.605	0.6675	0.125	0.478815	0	3	2	4	2	Lu3	Cu2	Ti4	0	9	0	20.959	20.2924	43.2672	1.27	1.9	1.54						h
Lu2CuTiO6	Lu	Cu	Ti	O	f	d	d		0.73	0.605	0.6675	0.125	0.478815	0	3	2	4	2	Lu3	Cu2	Ti4	0	9	0	20.959	20.2924	43.2672	1.27	1.9	1.54						h
Lu2MnTiO6	Lu	Mn	Ti	O	f	d	d		0.83	0.605	0.7175	0.225	0.467509	0	3	2	4	2	Lu3	Mn2	Ti4	0	5	0	20.959	15.64	43.2672	1.27	1.55	1.54						h
Lu2NiMnO6	Lu	Ni	Mn	O	f	d	d		0.69	0.53	0.61	0.16	0.492512	0	3	2	4	2	Lu3	Ni2	Mn4	0	8	3	20.959	18.1688	51.2	1.27	1.91	1.55	nitrates	O2	1300			m	P21/c?	5.15	5.51	7.41048				52.5709		138	rs?
Mn2AlSbO6	Mn	Al	Sb	O	d	p	p		0.535	0.6	0.5675	0.065	0.503151	0	2	3	5	2	Mn2	Al3	Sb5	5		10	15.64	28.4476	55	1.55	1.61	2.05	HP		900
Mn2CrSbO6	Mn	Cr	Sb	O	d	d	p		0.615	0.6	0.6075	0.015	0.493126	0	2	3	5	2	Mn2	Cr3	Sb5	5	3	10	15.64	30.959	55	1.55	1.66	2.05	HP		900
Mn2FeSbO6	Mn	Fe	Sb	O	d	d	p		0.645	0.6	0.6225	0.045	0.489468	0	2	3	5	2	Mn2	Fe3	Sb5	5	5	10	15.64	30.651	55	1.55	1.83	2.05	HP		273			m	P21/n	5.2341	5.3894	7.6415		90.372		53.888			rs	1
Mn2FeSbO6	Mn	Fe	Sb	O	d	d	p		0.645	0.6	0.6225	0.045	0.489468	0	2	3	5	2	Mn2	Fe3	Sb5	5	5	10	15.64	30.651	55	1.55	1.83	2.05	HP		1000			m	P21/n	5.2431	5.3935	7.6358		89.693		53.9818		141.533	rs	1
Mn2FeSbO6	Mn	Fe	Sb	O	d	d	p		0.645	0.6	0.6225	0.045	0.489468	0	2	3	5	2	Mn2	Fe3	Sb5	5	5	10	15.64	30.651	55	1.55	1.83	2.05	HP		900			o		5.394	5.246	7.652				54.132
Mn2GaSbO6	Mn	Ga	Sb	O	d	p	p		0.62	0.6	0.61	0.02	0.492512	0	2	3	5	2	Mn2	Ga3	Sb5	5	10	10	15.64	30.7258	55	1.55	1.81	2.05	HP		900
Mn2VSbO6	Mn	V	Sb	O	d	d	p		0.64	0.6	0.62	0.04	0.490074	0	2	3	5	2	Mn2	V3	Sb5	5	2	10	15.64	29.3111	55	1.55	1.63	2.05	HP		900
Na2ZrTeO6	Na	Zr	Te	O	s	d	p	1.39	0.72	0.56	0.64	0.16	0.967073	0.963606	1	4	6	2	Na1	Zr4	Te6		0	10	5.13908	34.4184	69.1	0.93	1.33	2.1			700			m		5.49899	5.53952	7.8138		90.014		59.5055			rs	1
Nd2CoMnO6	Nd	Co	Mn	O	f	d	d	1.27	0.745	0.53	0.6375	0.215	0.926614	0.881498	3	2	4	2	Nd3	Co2	Mn4		7	3	22.05	17.0844	51.2	1.14	1.88	1.55	ss	air	1400			o		5.329	5.531	7.623				56.1714
Nd2CoMnO6	Nd	Co	Mn	O	f	d	d	1.27	0.745	0.53	0.6375	0.215	0.926614	0.881498	3	2	4	2	Nd3	Co2	Mn4		7	3	22.05	17.0844	51.2	1.14	1.88	1.55	nitrate decomp					o	Pnma	5.514	7.662	5.418				57.2253			rs?
Nd2CoMnO6	Nd	Co	Mn	O	f	d	d	1.27	0.745	0.53	0.6375	0.215	0.926614	0.881498	3	2	4	2	Nd3	Co2	Mn4		7	3	22.05	17.0844	51.2	1.14	1.88	1.55	nitrates	O2	1300			m	P21/c?	5.42	5.52	7.67918				57.4372		143	rs?
Nd2CoMnO6	Nd	Co	Mn	O	f	d	d	1.27	0.745	0.53	0.6375	0.215	0.926614	0.881498	3	2	4	2	Nd3	Co2	Mn4		7	3	22.05	17.0844	51.2	1.14	1.88	1.55	sol-gel	air	1350			o		5.426	5.546	7.714				58.0336
Nd2CoMnO6	Nd	Co	Mn	O	f	d	d	1.27	0.745	0.53	0.6375	0.215	0.926614	0.881498	3	2	4	2	Nd3	Co2	Mn4		7	3	22.05	17.0844	51.2	1.14	1.88	1.55	sol-gel	air	700			o		5.456	5.555	7.73				58.5704
Nd2CoMnO6	Nd	Co	Mn	O	f	d	d	1.27	0.745	0.53	0.6375	0.215	0.926614	0.881498	3	2	4	2	Nd3	Co2	Mn4		7	3	22.05	17.0844	51.2	1.14	1.88	1.55	ss	air	1420
Nd2CoMnO6	Nd	Co	Mn	O	f	d	d	1.27	0.745	0.53	0.6375	0.215	0.926614	0.881498	3	2	4	2	Nd3	Co2	Mn4		7	3	22.05	17.0844	51.2	1.14	1.88	1.55
Nd2CoPtO6	Nd	Co	Pt	O	f	d	d		0.745	0.625	0.685	0.12	0.474796	0	3	2	4	2	Nd3	Co2	Pt4		7	6	22.05	17.0844	43	1.14	1.88	2.28	ss		930			m	P21/n	5.4416	5.6975	7.7495		90		60.0654			rs	0.92
Nd2CoRuO6	Nd	Co	Ru	O	f	d	d	1.27	0.745	0.62	0.6825	0.125	0.906591	0.86245	3	2	4	2	Nd3	Co2	Ru4		7	4	22.05	17.0844	45	1.14	1.88	2.2	ss	air	1400			m	P21/n	5.44137	5.7186	7.7409		90.0059		60.2184		147.594	rs	0.86
Nd2CuIrO6	Nd	Cu	Ir	O	f	d	d	1.27	0.73	0.625	0.6775	0.105	0.908773	0.864525	3	2	4	2	Nd3	Cu2	Ir4		9	5	22.05	20.2924	40	1.14	1.9	2.2						m		5.5989	5.7741	7.74		91.6		62.5315			rs
Nd2CuMnO6	Nd	Cu	Mn	O	f	d	d	1.27	0.73	0.53	0.63	0.2	0.930037	0.884754	3	2	4	2	Nd3	Cu2	Mn4		9	3	22.05	20.2924	51.2	1.14	1.9	1.55						o		5.4414	5.5991	7.5716				57.6709			d	0
Nd2CuSnO6	Nd	Cu	Sn	O	f	d	p	1.27	0.73	0.69	0.71	0.04	0.894775	0.851209	3	2	4	2	Nd3	Cu2	Sn4		9	10	22.05	20.2924	40.735	1.14	1.9	1.96	HP		1200			m	P21/m	8.41	7.7132	7.74		92.011		62.7211		152	l
Nd2CuSnO6	Nd	Cu	Sn	O	f	d	p	1.27	0.73	0.69	0.71	0.04	0.894775	0.851209	3	2	4	2	Nd3	Cu2	Sn4		9	10	22.05	20.2924	40.735	1.14	1.9	1.96	HP					m	P21/m	8.413	7.717	7.744		92		62.8073			l
Nd2CuTiO6	Nd	Cu	Ti	O	f	d	d	1.27	0.73	0.605	0.6675	0.125	0.913168	0.868707	3	2	4	2	Nd3	Cu2	Ti4		9	0	22.05	20.2924	43.2672	1.14	1.9	1.54	ss	air	1300			o	Pbmn	5.4695	5.7242	7.6235				59.6701			d	0
Nd2CuTiO6	Nd	Cu	Ti	O	f	d	d	1.27	0.73	0.605	0.6675	0.125	0.913168	0.868707	3	2	4	2	Nd3	Cu2	Ti4		9	0	22.05	20.2924	43.2672	1.14	1.9	1.54						o		5.4619	5.7257	7.6257				59.62			d	0
Nd2CuTiO6	Nd	Cu	Ti	O	f	d	d	1.27	0.73	0.605	0.6675	0.125	0.913168	0.868707	3	2	4	2	Nd3	Cu2	Ti4		9	0	22.05	20.2924	43.2672	1.14	1.9	1.54	ss	air	1100			o	Pnma	5.7247	7.635	5.475				59.8254			d	0
Nd2GaMnO6	Nd	Ga	Mn	O	f	p	d	1.27	0.62	0.645	0.6325	0.025	0.928893	0.883666	3	3	3	0	Nd3	Ga3	Mn3		10	4	22.05	30.7258	33.668	1.14	1.81	1.55	ss	air	1400			o	Pnma	5.64577	7.65213	5.41943				58.5328		151.833	d	0	black
Nd2LiIrO6	Nd	Li	Ir	O	f	s	d	1.27	0.76	0.57	0.665	0.19	0.914274	0.869758	3	1	5	4	Nd3	Li1	Ir5			4	22.05	5.39171	57	1.14	0.98	2.2	flux		700			m	P21/n	5.429	5.7412	7.704		90.543		60.0287		148.267	rs
Nd2LiOsO6	Nd	Li	Os	O	f	s	d	1.27	0.76	0.575	0.6675	0.185	0.913168	0.868707	3	1	5	4	Nd3	Li1	Os5			3	22.05	5.39171	55	1.14	0.98	2.2	flux		600			m	P21/n	5.4345	5.7383	7.7193		90.496		60.1789		148.023	rs		black
Nd2LiRuO6	Nd	Li	Ru	O	f	s	d	1.27	0.76	0.565	0.6625	0.195	0.915382	0.870813	3	1	5	4	Nd3	Li1	Ru5			3	22.05	5.39171	59	1.14	0.98	2.2	ss	air	980			m	P21/n	5.4206	5.7023	7.6914		90.391		59.4337		149.2	rs	1
Nd2MgIrO6	Nd	Mg	Ir	O	f	s	d	1.27	0.72	0.625	0.6725	0.095	0.910965	0.866611	3	2	4	2	Nd3	Mg2	Ir4			5	22.05	15.0353	40	1.14	1.31	2.2	flux		700			m	P21/n	5.4787	5.6517	7.8125		90.021		60.4765			rs	1
Nd2MgPtO6	Nd	Mg	Pt	O	f	s	d		0.72	0.625	0.6725	0.095	0.47766	0	3	2	4	2	Nd3	Mg2	Pt4			6	22.05	15.0353	43	1.14	1.31	2.28	ss		1100					5.4752	5.6656	7.8107				60.5726
Nd2MgSnO6	Nd	Mg	Sn	O	f	s	p		0.72	0.69	0.705	0.03	0.470285	0	3	2	4	2	Nd3	Mg2	Sn4			10	22.05	15.0353	40.735	1.14	1.31	1.96	ss		1600			m	P21/n	5.5397	5.7304	7.9281		90.155		62.9186			rs	0.88
Nd2MgTiO6	Nd	Mg	Ti	O	f	s	d	1.27	0.72	0.605	0.6625	0.115	0.915382	0.870813	3	2	4	2	Nd3	Mg2	Ti4			0	22.05	15.0353	43.2672	1.14	1.31	1.54	ss	air	1400			m	P21/n	5.4661	5.5905	7.7768		90.01		59.4113			rs	0.92
Nd2MnRhO6	Nd	Mn	Rh	O	f	d	d	1.27	0.83	0.6	0.715	0.23	0.89266	0.849197	3	2	4	2	Nd3	Mn2	Rh4		5	5	22.05	15.64	42	1.14	1.55	2.28	ss	air	1050			o	Pnma	5.7327	7.6795	5.4197				59.6496		149.333	d	0
Nd2MnTiO6	Nd	Mn	Ti	O	f	d	d	1.27	0.83	0.605	0.7175	0.225	0.891606	0.848194	3	2	4	2	Nd3	Mn2	Ti4		5	0	22.05	15.64	43.2672	1.14	1.55	1.54	ss	H2/Ar	273			o		5.71	7.84889	5.5				61.6236		146.5	d
Nd2MnTiO6	Nd	Mn	Ti	O	f	d	d	1.27	0.83	0.605	0.7175	0.225	0.891606	0.848194	3	2	4	2	Nd3	Mn2	Ti4		5	0	22.05	15.64	43.2672	1.14	1.55	1.54	ss	H2/Ar	273			o	Pnma	5.7145	7.8589	5.5002				61.7531			d	0
Nd2NaIrO6	Nd	Na	Ir	O	f	s	d	1.27	1.02	0.57	0.795	0.45	0.860125	0.818247	3	1	5	4	Nd3	Na1	Ir5			4	22.05	5.13908	57	1.14	0.93	2.2	flux		700			m	P21/n	5.506	5.9228	7.9131		90.946		64.5046		141.767	rs
Nd2NaOsO6	Nd	Na	Os	O	f	s	d	1.27	1.02	0.575	0.7975	0.445	0.859147	0.817316	3	1	5	4	Nd3	Na1	Os5			3	22.05	5.13908	55	1.14	0.93	2.2	flux		600			m	P21/n	5.5162	5.9189	7.9293		90.987		64.713		141.833	rs	1	black
Nd2NaRuO6	Nd	Na	Ru	O	f	s	d	1.27	1.02	0.565	0.7925	0.455	0.861106	0.81918	3	1	5	4	Nd3	Na1	Ru5			3	22.05	5.13908	59	1.14	0.93	2.2	flux		600			m	P21/n	5.4944	5.9009	7.8971		90.883		64.0022		142.427	rs	1	black
Nd2NiMnO6	Nd	Ni	Mn	O	f	d	d	1.27	0.69	0.53	0.61	0.16	0.939291	0.893558	3	2	4	2	Nd3	Ni2	Mn4		8	3	22.05	18.1688	51.2	1.14	1.91	1.55	ss	air	1300			m	P21/n	5.4145	5.4842	7.6742		90.011		56.9698		157.9	rs	1
Nd2NiMnO6	Nd	Ni	Mn	O	f	d	d	1.27	0.69	0.53	0.61	0.16	0.939291	0.893558	3	2	4	2	Nd3	Ni2	Mn4		8	3	22.05	18.1688	51.2	1.14	1.91	1.55	sol-gel	air	900			m	P21/n										rs	0.768
Nd2NiMnO6	Nd	Ni	Mn	O	f	d	d	1.27	0.69	0.53	0.61	0.16	0.939291	0.893558	3	2	4	2	Nd3	Ni2	Mn4		8	3	22.05	18.1688	51.2	1.14	1.91	1.55	nitrate decomp					o	Pnma	5.468	7.685	5.378				56.498			rs?
Nd2NiMnO6	Nd	Ni	Mn	O	f	d	d	1.27	0.69	0.53	0.61	0.16	0.939291	0.893558	3	2	4	2	Nd3	Ni2	Mn4		8	3	22.05	18.1688	51.2	1.14	1.91	1.55	nitrates	O2	1300			m	P21/c?	5.4	5.47	7.66504				56.6025		145.667	rs?
Nd2NiMnO6	Nd	Ni	Mn	O	f	d	d	1.27	0.69	0.53	0.61	0.16	0.939291	0.893558	3	2	4	2	Nd3	Ni2	Mn4		8	3	22.05	18.1688	51.2	1.14	1.91	1.55	sol-gel	air/O2	1350			m	P21/n	5.41	7.676	5.481		90.03		56.9026			rs
Nd2NiMnO6	Nd	Ni	Mn	O	f	d	d	1.27	0.69	0.53	0.61	0.16	0.939291	0.893558	3	2	4	2	Nd3	Ni2	Mn4		8	3	22.05	18.1688	51.2	1.14	1.91	1.55	ss	air	1350			m	P21/n	5.4194	5.5004	7.6825		90.011		57.2517			rs	low?
Nd2NiMnO6	Nd	Ni	Mn	O	f	d	d	1.27	0.69	0.53	0.61	0.16	0.939291	0.893558	3	2	4	2	Nd3	Ni2	Mn4		8	3	22.05	18.1688	51.2	1.14	1.91	1.55	ss	air	1400			o		5.424	5.506	7.694				57.4445
Nd2NiMnO6	Nd	Ni	Mn	O	f	d	d	1.27	0.69	0.53	0.61	0.16	0.939291	0.893558	3	2	4	2	Nd3	Ni2	Mn4		8	3	22.05	18.1688	51.2	1.14	1.91	1.55	ss	air	1000			m	P21/n	5.514	5.478	7.777		90.01		58.7274		160.667	rs	0.2
Nd2NiMnO6	Nd	Ni	Mn	O	f	d	d	1.27	0.69	0.53	0.61	0.16	0.939291	0.893558	3	2	4	2	Nd3	Ni2	Mn4		8	3	22.05	18.1688	51.2	1.14	1.91	1.55	sol-gel	air	400
Nd2NiMnO6	Nd	Ni	Mn	O	f	d	d	1.27	0.69	0.53	0.61	0.16	0.939291	0.893558	3	2	4	2	Nd3	Ni2	Mn4		8	3	22.05	18.1688	51.2	1.14	1.91	1.55	sol-gel	air	1300
Nd2NiPtO6	Nd	Ni	Pt	O	f	d	d		0.69	0.625	0.6575	0.065	0.481142	0	3	2	4	2	Nd3	Ni2	Pt4		8	6	22.05	18.1688	43	1.14	1.91	2.28	ss		1100					5.4439	5.6752	7.7755				60.0564
Nd2NiRuO6	Nd	Ni	Ru	O	f	d	d	1.27	0.69	0.62	0.655	0.07	0.918723	0.873991	3	2	4	2	Nd3	Ni2	Ru4		8	4	22.05	18.1688	45	1.14	1.91	2.2	ss	capsule	1400			m	P21/n	5.432	5.677	7.732		90		59.6088			rs
Nd2ZnPtO6	Nd	Zn	Pt	O	f	d	d		0.74	0.625	0.6825	0.115	0.475366	0	3	2	4	2	Nd3	Zn2	Pt4		10	6	22.05	17.9644	43	1.14	1.65	2.28	ss		1000					5.4751	5.7221	7.8077				61.152
Pb2AlNbO6	Pb	Al	Nb	O	p	p	d	1.49	0.535	0.64	0.5875	0.105	1.0282	1.06022	2	3	5	2	Pb2	Al3	Nb5	10		0	15.0325	28.4476	50.5728	2.33	1.61	1.6	HP		1100					3.961						62.1462
Pb2CaReO6	Pb	Ca	Re	O	p	s	d	1.49	1	0.55	0.775	0.45	0.939558	0.968818	2	2	6	4	Pb2	Ca2	Re6	10	0	1	15.0325	11.8717	67	2.33	1	1.9	HP		550					4.12						69.9345
Pb2CaTeO6	Pb	Ca	Te	O	p	s	p	1.49	1	0.56	0.78	0.44	0.937403	0.966596	2	2	6	4	Pb2	Ca2	Te6	10	0	10	15.0325	11.8717	69.1	2.33	1	2.1			860					8.26	8.24	8.26		91.8333		70.2385
Pb2CaUO6	Pb	Ca	U	O	p	s	f	1.49	1	0.73	0.865	0.27	0.902225	0.930322	2	2	6	4	Pb2	Ca2	U6	10	0		15.0325	11.8717	62	2.33	1	1.38	ss	air	273			m	P21/n	6.0586	5.9739	8.5261		89.92		77.1472			rs
Pb2CdMoO6	Pb	Cd	Mo	O	p	d	d	1.49	0.95	0.59	0.77	0.36	0.941723	0.97105	2	2	6	4	Pb2	Cd2	Mo6	10	10	0	15.0325	16.9083	68.827	2.33	1.69	2.16	HP		900			m		4.172	4.124	4.172		91		71.7697			rs?
Pb2CdReO6	Pb	Cd	Re	O	p	d	d	1.49	0.95	0.55	0.75	0.4	0.950483	0.980083	2	2	6	4	Pb2	Cd2	Re6	10	10	1	15.0325	16.9083	67	2.33	1.69	1.9	HP		550					4.11						69.4265
Pb2CdTeO6	Pb	Cd	Te	O	p	d	p	1.49	0.95	0.56	0.755	0.39	0.948278	0.977809	2	2	6	4	Pb2	Cd2	Te6	10	10	10	15.0325	16.9083	69.1	2.33	1.69	2.1			860					8.24	8.28	8.24		92.5833		70.2026
Pb2CdUO6	Pb	Cd	U	O	p	d	f	1.49	0.95	0.73	0.84	0.22	0.912294	0.940705	2	2	6	4	Pb2	Cd2	U6	10	10		15.0325	16.9083	62	2.33	1.69	1.38	ss	air	273			m	P21/n	5.9889	6.0325	8.5138		89.9		76.8966			rs
Pb2CdWO6	Pb	Cd	W	O	p	d	d	1.49	0.95	0.6	0.775	0.35	0.939558	0.968818	2	2	6	4	Pb2	Cd2	W6	10	10	0	15.0325	16.9083	64.77	2.33	1.69	2.36	hot-pressing					o	Pmc21	5.8407	5.9436	8.176				70.957			rs
Pb2CoMoO6	Pb	Co	Mo	O	p	d	d	1.49	0.745	0.59	0.6675	0.155	0.98841	1.01919	2	2	6	4	Pb2	Co2	Mo6	10	7	0	15.0325	17.0844	68.827	2.33	1.88	2.16	HP		800			te		4.015		3.94				63.5137	0.98132		rs?
Pb2CoMoO6	Pb	Co	Mo	O	p	d	d	1.49	0.745	0.59	0.6675	0.155	0.98841	1.01919	2	2	6	4	Pb2	Co2	Mo6	10	7	0	15.0325	17.0844	68.827	2.33	1.88	2.16	HP		850			te		8.09		7.934				64.9082			rs
Pb2CoNbO6	Pb	Co	Nb	O	p	d	d	1.49	0.61	0.64	0.625	0.03	1.00915	1.04058	2	3	5	2	Pb2	Co3	Nb5	10	6	0	15.0325	33.5	50.5728	2.33	1.88	1.6								4.04						65.9393
Pb2CoNbO6	Pb	Co	Nb	O	p	d	d	1.49	0.61	0.64	0.625	0.03	1.00915	1.04058	2	3	5	2	Pb2	Co3	Nb5	10	6	0	15.0325	33.5	50.5728	2.33	1.88	1.6								8.08						65.9393
Pb2CoReO6	Pb	Co	Re	O	p	d	d	1.49	0.745	0.55	0.6475	0.195	0.998065	1.02915	2	2	6	4	Pb2	Co2	Re6	10	7	1	15.0325	17.0844	67	2.33	1.88	1.9	HP		600			?		7.97						63.2827			rs?
Pb2CoReO6	Pb	Co	Re	O	p	d	d	1.49	0.745	0.55	0.6475	0.195	0.998065	1.02915	2	2	6	4	Pb2	Co2	Re6	10	7	1	15.0325	17.0844	67	2.33	1.88	1.9								7.97						63.2827
Pb2CoReO6	Pb	Co	Re	O	p	d	d	1.49	0.745	0.55	0.6475	0.195	0.998065	1.02915	2	2	6	4	Pb2	Co2	Re6	10	7	1	15.0325	17.0844	67	2.33	1.88	1.9	HP		600					3.991						63.569
Pb2CoTaO6	Pb	Co	Ta	O	p	d	d	1.49	0.61	0.64	0.625	0.03	1.00915	1.04058	2	3	5	2	Pb2	Co3	Ta5	10	6	0	15.0325	33.5	48.272	2.33	1.88	1.5								4.03						65.4508
Pb2CoTeO6	Pb	Co	Te	O	p	d	p	1.49	0.745	0.56	0.6525	0.185	0.995634	1.02664	2	2	6	4	Pb2	Co2	Te6	10	7	10	15.0325	17.0844	69.1	2.33	1.88	2.1			820					8						64
Pb2CoTeO6	Pb	Co	Te	O	p	d	p	1.49	0.745	0.56	0.6525	0.185	0.995634	1.02664	2	2	6	4	Pb2	Co2	Te6	10	7	10	15.0325	17.0844	69.1	2.33	1.88	2.1	ss					m	P21/n							64		167	rs	1
Pb2CoTeO6	Pb	Co	Te	O	p	d	p	1.49	0.745	0.56	0.6525	0.185	0.995634	1.02664	2	2	6	4	Pb2	Co2	Te6	10	7	10	15.0325	17.0844	69.1	2.33	1.88	2.1	ss	O2	820			r	R-3	5.6782		13.8552				64.4783		170.7	rs	1
Pb2CoWO6	Pb	Co	W	O	p	d	d	1.49	0.745	0.6	0.6725	0.145	0.986026	1.01673	2	2	6	4	Pb2	Co2	W6	10	7	0	15.0325	17.0844	64.77	2.33	1.88	2.36								4.01	3.978	4.01		90.1833		63.9663
Pb2CoWO6	Pb	Co	W	O	p	d	d	1.49	0.745	0.6	0.6725	0.145	0.986026	1.01673	2	2	6	4	Pb2	Co2	W6	10	7	0	15.0325	17.0844	64.77	2.33	1.88	2.36	flux						I2/m(-1,s)	7.964	8.021	8.023	89.9	90	90	64.0625			rs
Pb2CoWO6	Pb	Co	W	O	p	d	d	1.49	0.745	0.6	0.6725	0.145	0.986026	1.01673	2	2	6	4	Pb2	Co2	W6	10	7	0	15.0325	17.0844	64.77	2.33	1.88	2.36	ss	PbO	273			m	I2/m(a0y)os	7.9602	5.6779	5.6967		90.047		64.3687			rs?
Pb2CoWO6	Pb	Co	W	O	p	d	d	1.49	0.745	0.6	0.6725	0.145	0.986026	1.01673	2	2	6	4	Pb2	Co2	W6	10	7	0	15.0325	17.0844	64.77	2.33	1.88	2.36	flux					o	P21cn?										rs
Pb2CrNbO6	Pb	Cr	Nb	O	p	d	d	1.49	0.615	0.64	0.6275	0.025	1.00791	1.0393	2	3	5	2	Pb2	Cr3	Nb5	10	3	0	15.0325	30.959	50.5728	2.33	1.66	1.6	flux		800					3.977						62.9023
Pb2CrTaO6	Pb	Cr	Ta	O	p	d	d	1.49	0.615	0.64	0.6275	0.025	1.00791	1.0393	2	3	5	2	Pb2	Cr3	Ta5	10	3	0	15.0325	30.959	48.272	2.33	1.66	1.5	flux		800					3.976						62.8549
Pb2CuWO6	Pb	Cu	W	O	p	d	d	1.49	0.73	0.6	0.665	0.13	0.989607	1.02043	2	2	6	4	Pb2	Cu2	W6	10	9	0	15.0325	20.2924	64.77	2.33	1.9	2.36	HP		800			te		3.85		4.04				59.8829	1.04935		rs?
Pb2DyNbO6	Pb	Dy	Nb	O	p	f	d	1.49	0.912	0.64	0.776	0.272	0.939126	0.968372	2	3	5	2	Pb2	Dy3	Nb5	10		0	15.0325	22.93	50.5728	2.33	1.22	1.6	HP		1400			m		4.191	4.13	4.191		90.71		72.5357
Pb2FeMoO6	Pb	Fe	Mo	O	p	d	d	1.49	0.78	0.59	0.685	0.19	0.980114	1.01064	2	2	6	4	Pb2	Fe2	Mo6	10	6	0	15.0325	16.1992	68.827	2.33	1.83	2.16	HP		800			c		7.976						63.4257
Pb2FeMoO6	Pb	Fe	Mo	O	p	d	d	1.49	0.78	0.59	0.685	0.19	0.980114	1.01064	2	2	6	4	Pb2	Fe2	Mo6	10	6	0	15.0325	16.1992	68.827	2.33	1.83	2.16	HP		1200			te	I4/mmm										d
Pb2FeNbO6	Pb	Fe	Nb	O	p	d	d	1.49	0.645	0.64	0.6425	0.005	1.00051	1.03167	2	3	5	2	Pb2	Fe3	Nb5	10	5	0	15.0325	30.651	50.5728	2.33	1.83	1.6	flux		800					4.011						64.5295
Pb2FeNbO6	Pb	Fe	Nb	O	p	d	d	1.49	0.645	0.64	0.6425	0.005	1.00051	1.03167	2	3	5	2	Pb2	Fe3	Nb5	10	5	0	15.0325	30.651	50.5728	2.33	1.83	1.6	ss	air	1100					4.013						64.626			d
Pb2FeNbO6	Pb	Fe	Nb	O	p	d	d	1.49	0.645	0.64	0.6425	0.005	1.00051	1.03167	2	3	5	2	Pb2	Fe3	Nb5	10	5	0	15.0325	30.651	50.5728	2.33	1.83	1.6								4.014			90.9			64.6744
Pb2FeNbO6	Pb	Fe	Nb	O	p	d	d	1.49	0.645	0.64	0.6425	0.005	1.00051	1.03167	2	3	5	2	Pb2	Fe3	Nb5	10	5	0	15.0325	30.651	50.5728	2.33	1.83	1.6	flux		1230			c		4.017						64.8195					dark brown
Pb2FeReO6	Pb	Fe	Re	O	p	d	d	1.49	0.645	0.58	0.6125	0.065	1.01542	1.04705	2	3	5	2	Pb2	Fe3	Re5	10	5	2	15.0325	30.651	51.9	2.33	1.83	1.9	HP		600					3.974						62.7601
Pb2FeReO6	Pb	Fe	Re	O	p	d	d	1.49	0.645	0.58	0.6125	0.065	1.01542	1.04705	2	3	5	2	Pb2	Fe3	Re5	10	5	2	15.0325	30.651	51.9	2.33	1.83	1.9	HP		1000			te	I4/m	5.618		7.9413				62.6607	0.999528		rs	0.794
Pb2FeReO6	Pb	Fe	Re	O	p	d	d	1.49	0.645	0.58	0.6125	0.065	1.01542	1.04705	2	3	5	2	Pb2	Fe3	Re5	10	5	2	15.0325	30.651	51.9	2.33	1.83	1.9	HP		600			?		7.94						62.5708			rs?
Pb2FeTaO6	Pb	Fe	Ta	O	p	d	d	1.49	0.645	0.64	0.6425	0.005	1.00051	1.03167	2	3	5	2	Pb2	Fe3	Ta5	10	5	0	15.0325	30.651	48.272	2.33	1.83	1.5								4						64
Pb2FeTaO6	Pb	Fe	Ta	O	p	d	d	1.49	0.645	0.64	0.6425	0.005	1.00051	1.03167	2	3	5	2	Pb2	Fe3	Ta5	10	5	0	15.0325	30.651	48.272	2.33	1.83	1.5	flux		800					4.006						64.2884
Pb2FeTaO6	Pb	Fe	Ta	O	p	d	d	1.49	0.645	0.64	0.6425	0.005	1.00051	1.03167	2	3	5	2	Pb2	Fe3	Ta5	10	5	0	15.0325	30.651	48.272	2.33	1.83	1.5	flux		1230			c		4.011						64.5295					dark brown
Pb2FeTiO6	Pb	Fe	Ti	O	p	d	d	1.49	0.585	0.605	0.595	0.02	1.02433	1.05623	2	4	4	0	Pb2	Fe4	Ti4	10	4	0	15.0325	54.91	43.2672	2.33	1.83	1.54	co-prec	air	700			te		3.928		4.036				62.2722	1.02749		d?
Pb2FeWO6	Pb	Fe	W	O	p	d	d	1.49	0.78	0.6	0.69	0.18	0.97777	1.00822	2	2	6	4	Pb2	Fe2	W6	10	6	0	15.0325	16.1992	64.77	2.33	1.83	2.36	HP		850			c		8.05						65.2075			rs
Pb2GaNbO6	Pb	Ga	Nb	O	p	p	d	1.49	0.62	0.64	0.63	0.02	1.00667	1.03802	2	3	5	2	Pb2	Ga3	Nb5	10	10	0	15.0325	30.7258	50.5728	2.33	1.81	1.6	HP		700					7.97						63.2827			rs
Pb2InNbO6	Pb	In	Nb	O	p	p	d	1.49	0.8	0.64	0.72	0.16	0.963933	0.993952	2	3	5	2	Pb2	In3	Nb5	10	10	0	15.0325	28.0441	50.5728	2.33	1.78	1.6	ss	air	1100					4.11						69.4265			d
Pb2LuNbO6	Pb	Lu	Nb	O	p	f	d	1.49	0.861	0.64	0.7505	0.221	0.950262	0.979855	2	3	5	2	Pb2	Lu3	Nb5	10	0	0	15.0325	20.959	50.5728	2.33	1.27	1.6	ss	air	1100														rs
Pb2MgMoO6	Pb	Mg	Mo	O	p	s	d	1.49	0.72	0.59	0.655	0.13	0.994423	1.02539	2	2	6	4	Pb2	Mg2	Mo6	10		0	15.0325	15.0353	68.827	2.33	1.31	2.16	HP		800			m		3.953	3.912	3.953		91.48		61.1093			rs?
Pb2MgReO6	Pb	Mg	Re	O	p	s	d	1.49	0.72	0.55	0.635	0.17	1.0042	1.03547	2	2	6	4	Pb2	Mg2	Re6	10		1	15.0325	15.0353	67	2.33	1.31	1.9	HP		600					3.9						59.319
Pb2MgReO6	Pb	Mg	Re	O	p	s	d	1.49	0.72	0.55	0.635	0.17	1.0042	1.03547	2	2	6	4	Pb2	Mg2	Re6	10		1	15.0325	15.0353	67	2.33	1.31	1.9	HP		600			?		7.97						63.2827			rs?
Pb2MgTeO6	Pb	Mg	Te	O	p	s	p	1.49	0.72	0.56	0.64	0.16	1.00173	1.03293	2	2	6	4	Pb2	Mg2	Te6	10		10	15.0325	15.0353	69.1	2.33	1.31	2.1			840					7.99						63.7603
Pb2MgTeO6	Pb	Mg	Te	O	p	s	p	1.49	0.72	0.56	0.64	0.16	1.00173	1.03293	2	2	6	4	Pb2	Mg2	Te6	10		10	15.0325	15.0353	69.1	2.33	1.31	2.1	ss	air?	273			c	Fm-3m	7.9936						63.8465			rs
Pb2MgTeO6	Pb	Mg	Te	O	p	s	p	1.49	0.72	0.56	0.64	0.16	1.00173	1.03293	2	2	6	4	Pb2	Mg2	Te6	10		10	15.0325	15.0353	69.1	2.33	1.31	2.1						c	Fm-3m	7.997						63.928			rs	1
Pb2MgUO6	Pb	Mg	U	O	p	s	f	1.49	0.72	0.73	0.725	0.01	0.961665	0.991613	2	2	6	4	Pb2	Mg2	U6	10			15.0325	15.0353	62	2.33	1.31	1.38	ss	air	273			m	P21/n	5.8461	5.8338	8.2492		90.064		70.3347			rs
Pb2MgWO6	Pb	Mg	W	O	p	s	d	1.49	0.72	0.6	0.66	0.12	0.992009	1.0229	2	2	6	4	Pb2	Mg2	W6	10		0	15.0325	15.0353	64.77	2.33	1.31	2.36	ss					o	Pmcn	7.944	5.6866	11.4059							rs
Pb2MgWO6	Pb	Mg	W	O	p	s	d	1.49	0.72	0.6	0.66	0.12	0.992009	1.0229	2	2	6	4	Pb2	Mg2	W6	10		0	15.0325	15.0353	64.77	2.33	1.31	2.36	ss?					o	Pmcn?	7.9446	5.687	11.407							rs	1
Pb2MnNbO6	Pb	Mn	Nb	O	p	d	d	1.49	0.645	0.64	0.6425	0.005	1.00051	1.03167	2	3	5	2	Pb2	Mn3	Nb5	10	4	0	15.0325	33.668	50.5728	2.33	1.55	1.6								4.006	4.006	4.006		90.0833		64.2884
Pb2MnNbO6	Pb	Mn	Nb	O	p	d	d	1.49	0.645	0.64	0.6425	0.005	1.00051	1.03167	2	3	5	2	Pb2	Mn3	Nb5	10	4	0	15.0325	33.668	50.5728	2.33	1.55	1.6	ss	air	273			c	Pm-3m	4.0085						64.4089			d
Pb2MnNbO6	Pb	Mn	Nb	O	p	d	d	1.49	0.645	0.64	0.6425	0.005	1.00051	1.03167	2	3	5	2	Pb2	Mn3	Nb5	10	4	0	15.0325	33.668	50.5728	2.33	1.55	1.6	flux		800					4.012						64.5777
Pb2MnReO6	Pb	Mn	Re	O	p	d	d	1.49	0.83	0.55	0.69	0.28	0.97777	1.00822	2	2	6	4	Pb2	Mn2	Re6	10	5	1	15.0325	15.64	67	2.33	1.55	1.9	ss	vacuum	550			m	P21/n	5.7054	5.7714	8.0415		90.14		66.1977		155.437	rs	0.72
Pb2MnReO6	Pb	Mn	Re	O	p	d	d	1.49	0.83	0.55	0.69	0.28	0.97777	1.00822	2	2	6	4	Pb2	Mn2	Re6	10	5	1	15.0325	15.64	67	2.33	1.55	1.9	ss	Ar	710			m	C2/m	18.2309	8.0359	5.7072		108.288					rs	1	black
Pb2MnReO6	Pb	Mn	Re	O	p	d	d	1.49	0.83	0.55	0.69	0.28	0.97777	1.00822	2	2	6	4	Pb2	Mn2	Re6	10	5	1	15.0325	15.64	67	2.33	1.55	1.9								8.086	8.024	8.086		90.55		65.5765
Pb2MnReO6	Pb	Mn	Re	O	p	d	d	1.49	0.83	0.55	0.69	0.28	0.97777	1.00822	2	2	6	4	Pb2	Mn2	Re6	10	5	1	15.0325	15.64	67	2.33	1.55	1.9	HP		600					4.04						65.9393
Pb2MnTaO6	Pb	Mn	Ta	O	p	d	d	1.49	0.645	0.64	0.6425	0.005	1.00051	1.03167	2	3	5	2	Pb2	Mn3	Ta5	10	4	0	15.0325	33.668	48.272	2.33	1.55	1.5	HP		1100					4.061						66.9729
Pb2MnTaO6	Pb	Mn	Ta	O	p	d	d	1.49	0.645	0.64	0.6425	0.005	1.00051	1.03167	2	3	5	2	Pb2	Mn3	Ta5	10	4	0	15.0325	33.668	48.272	2.33	1.55	1.5	flux		800					4.008						64.3848
Pb2MnTeO6	Pb	Mn	Te	O	p	d	p	1.49	0.83	0.56	0.695	0.27	0.975436	1.00581	2	2	6	4	Pb2	Mn2	Te6	10	5	10	15.0325	15.64	69.1	2.33	1.55	2.1			830					8.06						65.4508
Pb2MnTeO6	Pb	Mn	Te	O	p	d	p	1.49	0.83	0.56	0.695	0.27	0.975436	1.00581	2	2	6	4	Pb2	Mn2	Te6	10	5	10	15.0325	15.64	69.1	2.33	1.55	2.1	flux					c	P4-3m	4.045						66.1844			d	0
Pb2MnWO6	Pb	Mn	W	O	p	d	d	1.49	0.83	0.6	0.715	0.23	0.966212	0.996302	2	2	6	4	Pb2	Mn2	W6	10	5	0	15.0325	15.64	64.77	2.33	1.55	2.36	ss	Ar	820			o	Pnma	11.6455	8.0304	5.7874							rs	1	brown
Pb2MnWO6	Pb	Mn	W	O	p	d	d	1.49	0.83	0.6	0.715	0.23	0.966212	0.996302	2	2	6	4	Pb2	Mn2	W6	10	5	0	15.0325	15.64	64.77	2.33	1.55	2.36								4.063	4.033	4.063		90.2		66.5762
Pb2MnWO6	Pb	Mn	W	O	p	d	d	1.49	0.83	0.6	0.715	0.23	0.966212	0.996302	2	2	6	4	Pb2	Mn2	W6	10	5	0	15.0325	15.64	64.77	2.33	1.55	2.36	HP		850			te		8.222		7.91				66.8408			rs
Pb2NiMoO6	Pb	Ni	Mo	O	p	d	d	1.49	0.69	0.59	0.64	0.1	1.00173	1.03293	2	2	6	4	Pb2	Ni2	Mo6	10	8	0	15.0325	18.1688	68.827	2.33	1.91	2.16	HP		800					3.97						62.5708			rs?
Pb2NiReO6	Pb	Ni	Re	O	p	d	d	1.49	0.69	0.55	0.62	0.14	1.01165	1.04316	2	2	6	4	Pb2	Ni2	Re6	10	8	1	15.0325	18.1688	67	2.33	1.91	1.9	HP		1000			m	I2/m	5.6021	5.6238	7.9287		90.284		62.4478		171.333	rs	1
Pb2NiReO6	Pb	Ni	Re	O	p	d	d	1.49	0.69	0.55	0.62	0.14	1.01165	1.04316	2	2	6	4	Pb2	Ni2	Re6	10	8	1	15.0325	18.1688	67	2.33	1.91	1.9	HP		600					3.972						62.6654
Pb2NiReO6	Pb	Ni	Re	O	p	d	d	1.49	0.69	0.55	0.62	0.14	1.01165	1.04316	2	2	6	4	Pb2	Ni2	Re6	10	8	1	15.0325	18.1688	67	2.33	1.91	1.9	HP		600			?		7.95						62.8075			rs?
Pb2NiReO6	Pb	Ni	Re	O	p	d	d	1.49	0.69	0.55	0.62	0.14	1.01165	1.04316	2	2	6	4	Pb2	Ni2	Re6	10	8	1	15.0325	18.1688	67	2.33	1.91	1.9								7.95						62.8075
Pb2NiTeO6	Pb	Ni	Te	O	p	d	p	1.49	0.69	0.56	0.625	0.13	1.00915	1.04058	2	2	6	4	Pb2	Ni2	Te6	10	8	10	15.0325	18.1688	69.1	2.33	1.91	2.1			840					7.97						63.2827
Pb2NiUO6	Pb	Ni	U	O	p	d	f	1.49	0.69	0.73	0.71	0.04	0.968502	0.998663	2	2	6	4	Pb2	Ni2	U6	10	8		15.0325	18.1688	62	2.33	1.91	1.38	ss	air	1000			m	P21/n	5.777	5.781	8.225		89.77		68.6717			rs
Pb2NiWO6	Pb	Ni	W	O	p	d	d	1.49	0.69	0.6	0.645	0.09	0.999285	1.0304	2	2	6	4	Pb2	Ni2	W6	10	8	0	15.0325	18.1688	64.77	2.33	1.91	2.36								7.96						63.0448
Pb2NiWO6	Pb	Ni	W	O	p	d	d	1.49	0.69	0.6	0.645	0.09	0.999285	1.0304	2	2	6	4	Pb2	Ni2	W6	10	8	0	15.0325	18.1688	64.77	2.33	1.91	2.36	HP		750					7.962						63.0923			rs
Pb2NiWO6	Pb	Ni	W	O	p	d	d	1.49	0.69	0.6	0.645	0.09	0.999285	1.0304	2	2	6	4	Pb2	Ni2	W6	10	8	0	15.0325	18.1688	64.77	2.33	1.91	2.36	HP		800			c		7.977						63.4496			rs
Pb2ScNbO6	Pb	Sc	Nb	O	p	d	d	1.49	0.745	0.64	0.6925	0.105	0.976601	1.00701	2	3	5	2	Pb2	Sc3	Nb5	10	0	0	15.0325	24.7568	50.5728	2.33	1.36	1.6	flux		800					4.077						67.7676
Pb2ScNbO6	Pb	Sc	Nb	O	p	d	d	1.49	0.745	0.64	0.6925	0.105	0.976601	1.00701	2	3	5	2	Pb2	Sc3	Nb5	10	0	0	15.0325	24.7568	50.5728	2.33	1.36	1.6	ss	air	1100					4.078						67.8175			d
Pb2ScNbO6	Pb	Sc	Nb	O	p	d	d	1.49	0.745	0.64	0.6925	0.105	0.976601	1.00701	2	3	5	2	Pb2	Sc3	Nb5	10	0	0	15.0325	24.7568	50.5728	2.33	1.36	1.6	ss	air	1000			r	R3m	4.0828			89.915			68.0572			d	0
Pb2ScNbO6	Pb	Sc	Nb	O	p	d	d	1.49	0.745	0.64	0.6925	0.105	0.976601	1.00701	2	3	5	2	Pb2	Sc3	Nb5	10	0	0	15.0325	24.7568	50.5728	2.33	1.36	1.6	flux		1150			c		4.086						68.2174					dark blue/black
Pb2ScNbO6	Pb	Sc	Nb	O	p	d	d	1.49	0.745	0.64	0.6925	0.105	0.976601	1.00701	2	3	5	2	Pb2	Sc3	Nb5	10	0	0	15.0325	24.7568	50.5728	2.33	1.36	1.6	ss		273			r	R3m										d	0
Pb2ScNbO6	Pb	Sc	Nb	O	p	d	d	1.49	0.745	0.64	0.6925	0.105	0.976601	1.00701	2	3	5	2	Pb2	Sc3	Nb5	10	0	0	15.0325	24.7568	50.5728	2.33	1.36	1.6	ss		273			r	R3										rs	0.6
Pb2ScNbO6	Pb	Sc	Nb	O	p	d	d	1.49	0.745	0.64	0.6925	0.105	0.976601	1.00701	2	3	5	2	Pb2	Sc3	Nb5	10	0	0	15.0325	24.7568	50.5728	2.33	1.36	1.6	ss		273			r	R3										rs	0.85
Pb2ScSbO6	Pb	Sc	Sb	O	p	d	p	1.49	0.745	0.6	0.6725	0.145	0.986026	1.01673	2	3	5	2	Pb2	Sc3	Sb5	10	0	10	15.0325	24.7568	55	2.33	1.36	2.05	ss	air	950			c	Fm-3m	8.105						66.5532			rs	1	gray-green
Pb2ScTaO6	Pb	Sc	Ta	O	p	d	d	1.49	0.745	0.64	0.6925	0.105	0.976601	1.00701	2	3	5	2	Pb2	Sc3	Ta5	10	0	0	15.0325	24.7568	48.272	2.33	1.36	1.5	flux		1325			c		4.08						67.9173					dark brown
Pb2ScTaO6	Pb	Sc	Ta	O	p	d	d	1.49	0.745	0.64	0.6925	0.105	0.976601	1.00701	2	3	5	2	Pb2	Sc3	Ta5	10	0	0	15.0325	24.7568	48.272	2.33	1.36	1.5																	rs	0.52
Pb2SrUO6	Pb	Sr	U	O	p	s	f	1.49	1.18	0.73	0.955	0.45	0.867745	0.894768	2	2	6	4	Pb2	Sr2	U6	10	0		15.0325	11.0303	62	2.33	0.95	1.38	ss	air	273			m	P21/n	6.074	6.023	8.539		89.87		78.0969			rs
Pb2TmNbO6	Pb	Tm	Nb	O	p	f	d	1.49	0.88	0.64	0.76	0.24	0.946083	0.975545	2	3	5	2	Pb2	Tm3	Nb5	10		0	15.0325	23.68	50.5728	2.33	1.25	1.6	ss	air	1100														rs
Pb2TmSbO6	Pb	Tm	Sb	O	p	f	p	1.49	0.88	0.6	0.74	0.28	0.954925	0.984663	2	3	5	2	Pb2	Tm3	Sb5	10		10	15.0325	23.68	55	2.33	1.25	2.05	ss	air	900			m	C2/c	10.1523	5.8224	10.1379		108.729				160.2	rs		light yellowish
Pb2YbNbO6	Pb	Yb	Nb	O	p	f	d	1.49	0.868	0.64	0.754	0.228	0.948718	0.978263	2	3	5	2	Pb2	Yb3	Nb5	10		0	15.0325	25.053	50.5728	2.33	0	1.6	ss	air	1120			o	Pbnm	5.918	23.453	8.221							rs
Pb2YbNbO6	Pb	Yb	Nb	O	p	f	d	1.49	0.868	0.64	0.754	0.228	0.948718	0.978263	2	3	5	2	Pb2	Yb3	Nb5	10		0	15.0325	25.053	50.5728	2.33	0	1.6	ss	air	1100														rs
Pb2YbTaO6	Pb	Yb	Ta	O	p	f	d	1.49	0.868	0.64	0.754	0.228	0.948718	0.978263	2	3	5	2	Pb2	Yb3	Ta5	10		0	15.0325	25.053	48.272	2.33	0	1.5	ss	air	850					5.858	23.644	8.235							rs	1
Pb2ZnMoO6	Pb	Zn	Mo	O	p	d	d	1.49	0.74	0.59	0.665	0.15	0.989607	1.02043	2	2	6	4	Pb2	Zn2	Mo6	10	10	0	15.0325	17.9644	68.827	2.33	1.65	2.16	HP		1000			m		4.008	3.888	4.008		91		62.4476			rs?
Pb2ZnReO6	Pb	Zn	Re	O	p	d	d	1.49	0.74	0.55	0.645	0.19	0.999285	1.0304	2	2	6	4	Pb2	Zn2	Re6	10	10	1	15.0325	17.9644	67	2.33	1.65	1.9	HP		600					4.001						64.048
Pb2ZnTeO6	Pb	Zn	Te	O	p	d	p	1.49	0.74	0.56	0.65	0.18	0.996848	1.02789	2	2	6	4	Pb2	Zn2	Te6	10	10	10	15.0325	17.9644	69.1	2.33	1.65	2.1			820					8.01						64.2403
Pb2ZnUO6	Pb	Zn	U	O	p	d	f	1.49	0.74	0.73	0.735	0.01	0.957161	0.986969	2	2	6	4	Pb2	Zn2	U6	10	10		15.0325	17.9644	62	2.33	1.65	1.38	ss	air	1000			m	P21/n	5.834	5.842	8.267		89.95		70.4394			rs
Pb2ZnWO6	Pb	Zn	W	O	p	d	d	1.49	0.74	0.6	0.67	0.14	0.987217	1.01796	2	2	6	4	Pb2	Zn2	W6	10	10	0	15.0325	17.9644	64.77	2.33	1.65	2.36	HP		850			te		8.122		7.91				65.2248			rs
Pr2CoMnO6	Pr	Co	Mn	O	f	d	d		0.745	0.53	0.6375	0.215	0.485865	0	3	2	4	2	Pr3	Co2	Mn4		7	3	21.6237	17.0844	51.2	1.13	1.88	1.55	nitrate decomp					o	Pnma	5.49	7.695	5.442				57.4751			rs?
Pr2CoMnO6	Pr	Co	Mn	O	f	d	d		0.745	0.53	0.6375	0.215	0.485865	0	3	2	4	2	Pr3	Co2	Mn4		7	3	21.6237	17.0844	51.2	1.13	1.88	1.55	ss	air	1400			c		7.72						57.5125
Pr2CoMnO6	Pr	Co	Mn	O	f	d	d		0.745	0.53	0.6375	0.215	0.485865	0	3	2	4	2	Pr3	Co2	Mn4		7	3	21.6237	17.0844	51.2	1.13	1.88	1.55	nitrates	O2	1300			m	P21/c?	5.45	5.5	7.70746				57.7578		143.333	rs?
Pr2CoMnO6	Pr	Co	Mn	O	f	d	d		0.745	0.53	0.6375	0.215	0.485865	0	3	2	4	2	Pr3	Co2	Mn4		7	3	21.6237	17.0844	51.2	1.13	1.88	1.55	sol-gel	air	1350			o		5.47	5.513	7.743				58.3747
Pr2CoMnO6	Pr	Co	Mn	O	f	d	d		0.745	0.53	0.6375	0.215	0.485865	0	3	2	4	2	Pr3	Co2	Mn4		7	3	21.6237	17.0844	51.2	1.13	1.88	1.55	sol-gel	air	700			o		5.478	5.527	7.75				58.6615
Pr2CoMnO6	Pr	Co	Mn	O	f	d	d		0.745	0.53	0.6375	0.215	0.485865	0	3	2	4	2	Pr3	Co2	Mn4		7	3	21.6237	17.0844	51.2	1.13	1.88	1.55
Pr2CoPtO6	Pr	Co	Pt	O	f	d	d		0.745	0.625	0.685	0.12	0.474796	0	3	2	4	2	Pr3	Co2	Pt4		7	6	21.6237	17.0844	43	1.13	1.88	2.28	ss		930			m	P21/n	5.4833	5.7043	7.7842		90		60.8693			rs	0.9
Pr2CoRuO6	Pr	Co	Ru	O	f	d	d		0.745	0.62	0.6825	0.125	0.475366	0	3	2	4	2	Pr3	Co2	Ru4		7	4	21.6237	17.0844	45	1.13	1.88	2.2	ss	air	1400			m	P21/n	5.48355	5.69605	7.7841		90.0059		60.7833		148.11	rs	0.912
Pr2CuSnO6	Pr	Cu	Sn	O	f	d	p		0.73	0.69	0.71	0.04	0.46917	0	3	2	4	2	Pr3	Cu2	Sn4		9	10	21.6237	20.2924	40.735	1.13	1.9	1.96	HP		1000			m	P21/m	8.4412	7.7395	7.7625		91.716		63.3627		156	l
Pr2CuSnO6	Pr	Cu	Sn	O	f	d	p		0.73	0.69	0.71	0.04	0.46917	0	3	2	4	2	Pr3	Cu2	Sn4		9	10	21.6237	20.2924	40.735	1.13	1.9	1.96	HP					m	P21/m	8.442	7.74	7.763		91.7		63.3774			l
Pr2CuTiO6	Pr	Cu	Ti	O	f	d	d		0.73	0.605	0.6675	0.125	0.478815	0	3	2	4	2	Pr3	Cu2	Ti4		9	0	21.6237	20.2924	43.2672	1.13	1.9	1.54	ss	air	1300			o	Pbmn	5.4941	5.7003	7.6553				59.9372			d	0
Pr2LiIrO6	Pr	Li	Ir	O	f	s	d		0.76	0.57	0.665	0.19	0.479394	0	3	1	5	4	Pr3	Li1	Ir5			4	21.6237	5.39171	57	1.13	0.98	2.2	flux		700			m	P21/n	5.4593	5.7219	7.735		90.222		60.4052		149.433	rs
Pr2LiOsO6	Pr	Li	Os	O	f	s	d		0.76	0.575	0.6675	0.185	0.478815	0	3	1	5	4	Pr3	Li1	Os5			3	21.6237	5.39171	55	1.13	0.98	2.2	flux		600			m	P21/n	5.4611	5.7179	7.7328		90.407		60.3646		148.9	rs		black
Pr2LiRuO6	Pr	Li	Ru	O	f	s	d		0.76	0.565	0.6625	0.195	0.479976	0	3	1	5	4	Pr3	Li1	Ru5			3	21.6237	5.39171	59	1.13	0.98	2.2	ss	air	980			m	P21/n	5.458	5.6855	7.7258		90.285		59.935		150	rs	1
Pr2MgIrO6	Pr	Mg	Ir	O	f	s	d		0.72	0.625	0.6725	0.095	0.47766	0	3	2	4	2	Pr3	Mg2	Ir4			5	21.6237	15.0353	40	1.13	1.31	2.2	flux		700			m	P21/n	5.5017	5.6576	7.8306		90.006		60.9346			rs	1
Pr2MgPtO6	Pr	Mg	Pt	O	f	s	d		0.72	0.625	0.6725	0.095	0.47766	0	3	2	4	2	Pr3	Mg2	Pt4			6	21.6237	15.0353	43	1.13	1.31	2.28	ss		1100					5.5071	5.6584	7.8334				61.0249
Pr2MnRhO6	Pr	Mn	Rh	O	f	d	d		0.83	0.6	0.715	0.23	0.468061	0	3	2	4	2	Pr3	Mn2	Rh4		5	5	21.6237	15.64	42	1.13	1.55	2.28	ss	air	273			o	Pnma	5.6362	7.7531	5.4788				59.8532		150.333	d	0
Pr2MnTiO6	Pr	Mn	Ti	O	f	d	d		0.83	0.605	0.7175	0.225	0.467509	0	3	2	4	2	Pr3	Mn2	Ti4		5	0	21.6237	15.64	43.2672	1.13	1.55	1.54	ss	H2/Ar	273			o		5.71	7.94788	5.6				63.5354			d
Pr2NaIrO6	Pr	Na	Ir	O	f	s	d		1.02	0.57	0.795	0.45	0.451002	0	3	1	5	4	Pr3	Na1	Ir5			4	21.6237	5.13908	57	1.13	0.93	2.2	flux		700			m	P21/n	5.5322	5.9341	7.9412		90.793		65.1684		142.367	rs
Pr2NaOsO6	Pr	Na	Os	O	f	s	d		1.02	0.575	0.7975	0.445	0.450489	0	3	1	5	4	Pr3	Na1	Os5			3	21.6237	5.13908	55	1.13	0.93	2.2	flux		600			m	P21/n	5.5427	5.9289	7.9509		90.854		65.3136		142.253	rs	1	black
Pr2NaRuO6	Pr	Na	Ru	O	f	s	d		1.02	0.565	0.7925	0.455	0.451516	0	3	1	5	4	Pr3	Na1	Ru5			3	21.6237	5.13908	59	1.13	0.93	2.2	ss	air	900			m	P21/n	5.5173	5.9119	7.9039		90.786		64.4457		142.937	rs	1	black
Pr2NiMnO6	Pr	Ni	Mn	O	f	d	d		0.69	0.53	0.61	0.16	0.492512	0	3	2	4	2	Pr3	Ni2	Mn4		8	3	21.6237	18.1688	51.2	1.13	1.91	1.55	ss	air	1300			m	P21/n	5.4453	5.4701	7.6966		90.03		57.3134		158.6	rs	1
Pr2NiMnO6	Pr	Ni	Mn	O	f	d	d		0.69	0.53	0.61	0.16	0.492512	0	3	2	4	2	Pr3	Ni2	Mn4		8	3	21.6237	18.1688	51.2	1.13	1.91	1.55	nitrate decomp					o	Pnma	5.449	7.696	5.411				56.7283			rs?
Pr2NiMnO6	Pr	Ni	Mn	O	f	d	d		0.69	0.53	0.61	0.16	0.492512	0	3	2	4	2	Pr3	Ni2	Mn4		8	3	21.6237	18.1688	51.2	1.13	1.91	1.55	nitrates	O2	1300			m	P21/c?	5.45	5.46	7.69332				57.2325		146.667	rs?
Pr2NiMnO6	Pr	Ni	Mn	O	f	d	d		0.69	0.53	0.61	0.16	0.492512	0	3	2	4	2	Pr3	Ni2	Mn4		8	3	21.6237	18.1688	51.2	1.13	1.91	1.55	ss	air	1400			r		5.448	5.475	7.72				57.5677
Pr2NiPtO6	Pr	Ni	Pt	O	f	d	d		0.69	0.625	0.6575	0.065	0.481142	0	3	2	4	2	Pr3	Ni2	Pt4		8	6	21.6237	18.1688	43	1.13	1.91	2.28	ss		1100					5.4799	5.675	7.8058				60.687
Pr2ZnPtO6	Pr	Zn	Pt	O	f	d	d		0.74	0.625	0.6825	0.115	0.475366	0	3	2	4	2	Pr3	Zn2	Pt4		10	6	21.6237	17.9644	43	1.13	1.65	2.28	ss		1000					5.5059	5.7302	7.8295				61.755
Sm2CoMnO6	Sm	Co	Mn	O	f	d	d	1.24	0.745	0.53	0.6375	0.215	0.916202	0.860675	3	2	4	2	Sm3	Co2	Mn4		7	3	23.56	17.0844	51.2	1.17	1.88	1.55	nitrates	O2	1300			m	P21/c?	5.35	5.55	7.60847				56.4786		141	rs?
Sm2CoMnO6	Sm	Co	Mn	O	f	d	d	1.24	0.745	0.53	0.6375	0.215	0.916202	0.860675	3	2	4	2	Sm3	Co2	Mn4		7	3	23.56	17.0844	51.2	1.17	1.88	1.55	ss	air	1400			o		5.369	5.551	7.598				56.6114
Sm2CoMnO6	Sm	Co	Mn	O	f	d	d	1.24	0.745	0.53	0.6375	0.215	0.916202	0.860675	3	2	4	2	Sm3	Co2	Mn4		7	3	23.56	17.0844	51.2	1.17	1.88	1.55	nitrate decomp					o	Pnma	5.56	7.597	5.371				56.7168			rs?
Sm2CoMnO6	Sm	Co	Mn	O	f	d	d	1.24	0.745	0.53	0.6375	0.215	0.916202	0.860675	3	2	4	2	Sm3	Co2	Mn4		7	3	23.56	17.0844	51.2	1.17	1.88	1.55	sol-gel	air	1350			o		5.379	5.582	7.651				57.4314
Sm2CoMnO6	Sm	Co	Mn	O	f	d	d	1.24	0.745	0.53	0.6375	0.215	0.916202	0.860675	3	2	4	2	Sm3	Co2	Mn4		7	3	23.56	17.0844	51.2	1.17	1.88	1.55	sol-gel	air	700			o		5.387	5.59	7.672				57.7574
Sm2CoMnO6	Sm	Co	Mn	O	f	d	d	1.24	0.745	0.53	0.6375	0.215	0.916202	0.860675	3	2	4	2	Sm3	Co2	Mn4		7	3	23.56	17.0844	51.2	1.17	1.88	1.55
Sm2CoPtO6	Sm	Co	Pt	O	f	d	d		0.745	0.625	0.685	0.12	0.474796	0	3	2	4	2	Sm3	Co2	Pt4		7	6	23.56	17.0844	43	1.17	1.88	2.28	ss		1000					5.3865	5.7019	7.6751				58.9319
Sm2CoRuO6	Sm	Co	Ru	O	f	d	d	1.24	0.745	0.62	0.6825	0.125	0.896404	0.842077	3	2	4	2	Sm3	Co2	Ru4		7	4	23.56	17.0844	45	1.17	1.88	2.2	ss	air	1400			m	P21/n	5.37936	5.73972	7.67067		90.0002		59.2099		145.818	rs	0.826
Sm2CuMnO6	Sm	Cu	Mn	O	f	d	d	1.24	0.73	0.53	0.63	0.2	0.919587	0.863855	3	2	4	2	Sm3	Cu2	Mn4		9	3	23.56	20.2924	51.2	1.17	1.9	1.55						o		5.3853	5.6582	7.472				56.92			d	0
Sm2CuSnO6	Sm	Cu	Sn	O	f	d	p	1.24	0.73	0.69	0.71	0.04	0.884721	0.831102	3	2	4	2	Sm3	Cu2	Sn4		9	10	23.56	20.2924	40.735	1.17	1.9	1.96	HP					m	P21/m	8.51	7.815	7.817		91.2		64.9701			l
Sm2CuTiO6	Sm	Cu	Ti	O	f	d	d	1.24	0.73	0.605	0.6675	0.125	0.902908	0.848186	3	2	4	2	Sm3	Cu2	Ti4		9	0	23.56	20.2924	43.2672	1.17	1.9	1.54	ss	air	1100			o	Pnma	5.74812	7.56025	5.41621				58.8434			d	0
Sm2CuTiO6	Sm	Cu	Ti	O	f	d	d	1.24	0.73	0.605	0.6675	0.125	0.902908	0.848186	3	2	4	2	Sm3	Cu2	Ti4		9	0	23.56	20.2924	43.2672	1.17	1.9	1.54						o		5.4141	5.7469	7.5653				58.8472			d	0
Sm2LiIrO6	Sm	Li	Ir	O	f	s	d	1.24	0.76	0.57	0.665	0.19	0.904001	0.849213	3	1	5	4	Sm3	Li1	Ir5			4	23.56	5.39171	57	1.17	0.98	2.2	flux		700			m	P21/n	5.3736	5.748	7.6346		90.368		58.9521		146.133	rs
Sm2LiOsO6	Sm	Li	Os	O	f	s	d	1.24	0.76	0.575	0.6675	0.185	0.902908	0.848186	3	1	5	4	Sm3	Li1	Os5			3	23.56	5.39171	55	1.17	0.98	2.2	flux		600			m	P21/n	5.3836	5.7419	7.651		90.688		59.1228		145.9	rs		black
Sm2LiRuO6	Sm	Li	Ru	O	f	s	d	1.24	0.76	0.565	0.6625	0.195	0.905097	0.850242	3	1	5	4	Sm3	Li1	Ru5			3	23.56	5.39171	59	1.17	0.98	2.2	ss	air	980			m	P21/n	5.37395	5.72164	7.63042		90.561		58.6519		146.8	rs	1
Sm2MgIrO6	Sm	Mg	Ir	O	f	s	d	1.24	0.72	0.625	0.6725	0.095	0.90073	0.84614	3	2	4	2	Sm3	Mg2	Ir4			5	23.56	15.0353	40	1.17	1.31	2.2	flux		700			m	P21/n	5.4197	5.6715	7.7498		90.013		59.553			rs	1
Sm2MgPtO6	Sm	Mg	Pt	O	f	s	d		0.72	0.625	0.6725	0.095	0.47766	0	3	2	4	2	Sm3	Mg2	Pt4			6	23.56	15.0353	43	1.17	1.31	2.28	ss		1000					5.4206	5.6813	7.7518				59.6812
Sm2MnRhO6	Sm	Mn	Rh	O	f	d	d	1.24	0.83	0.6	0.715	0.23	0.88263	0.829137	3	2	4	2	Sm3	Mn2	Rh4		5	5	23.56	15.64	42	1.17	1.55	2.28	ss	air	1050			o	Pnma	5.7444	7.6059	5.3604				58.5508		148.667	d	0
Sm2MnTiO6	Sm	Mn	Ti	O	f	d	d		0.83	0.605	0.7175	0.225	0.467509	0	3	2	4	2	Sm3	Mn2	Ti4		5	0	23.56	15.64	43.2672	1.17	1.55	1.54	ss	H2/Ar	273			m		5.71	7.79232	5.45				60.6233			rs?
Sm2NaIrO6	Sm	Na	Ir	O	f	s	d	1.24	1.02	0.57	0.795	0.45	0.850461	0.798918	3	1	5	4	Sm3	Na1	Ir5			4	23.56	5.13908	57	1.17	0.93	2.2	flux		273			m	P21/n	5.4656	5.888	7.8714		91.097		63.3167		140.3	rs
Sm2NiMnO6	Sm	Ni	Mn	O	f	d	d	1.24	0.69	0.53	0.61	0.16	0.928737	0.87245	3	2	4	2	Sm3	Ni2	Mn4		8	3	23.56	18.1688	51.2	1.17	1.91	1.55	ss	air	1300			m	P21/n	5.3524	5.5119	7.6103		90.034		56.1296		152.3	rs	1
Sm2NiMnO6	Sm	Ni	Mn	O	f	d	d	1.24	0.69	0.53	0.61	0.16	0.928737	0.87245	3	2	4	2	Sm3	Ni2	Mn4		8	3	23.56	18.1688	51.2	1.17	1.91	1.55	nitrate decomp					o	Pnma	5.492	7.583	5.334				55.5347			rs?
Sm2NiMnO6	Sm	Ni	Mn	O	f	d	d	1.24	0.69	0.53	0.61	0.16	0.928737	0.87245	3	2	4	2	Sm3	Ni2	Mn4		8	3	23.56	18.1688	51.2	1.17	1.91	1.55	nitrates	O2	1300			m	P21/c?	5.35	5.51	7.60847				56.0716		144.333	rs?
Sm2NiPtO6	Sm	Ni	Pt	O	f	d	d		0.69	0.625	0.6575	0.065	0.481142	0	3	2	4	2	Sm3	Ni2	Pt4		8	6	23.56	18.1688	43	1.17	1.91	2.28	ss		1000					5.3778	5.6983	7.7022				59.0072
Sm2NiRuO6	Sm	Ni	Ru	O	f	d	d	1.24	0.69	0.62	0.655	0.07	0.9084	0.853345	3	2	4	2	Sm3	Ni2	Ru4		8	4	23.56	18.1688	45	1.17	1.91	2.2	ss	capsule	1400			m	P21/n	5.374	5.68	7.673		90		58.5533			rs
Sm2ZnPtO6	Sm	Zn	Pt	O	f	d	d		0.74	0.625	0.6825	0.115	0.475366	0	3	2	4	2	Sm3	Zn2	Pt4		10	6	23.56	17.9644	43	1.17	1.65	2.28	ss		1000					5.4177	5.7413	7.739				60.1797
Sr2AlNbO6	Sr	Al	Nb	O	s	p	d	1.44	0.535	0.64	0.5875	0.105	1.01041	1.02464	2	3	5	2	Sr2	Al3	Nb5	0		0	11.0303	28.4476	50.5728	0.95	1.61	1.6	ss	air	1400			c	Fm-3m	7.7789						58.8389			rs?
Sr2AlNbO6	Sr	Al	Nb	O	s	p	d	1.44	0.535	0.64	0.5875	0.105	1.01041	1.02464	2	3	5	2	Sr2	Al3	Nb5	0		0	11.0303	28.4476	50.5728	0.95	1.61	1.6	ss	air	1400			c		7.784						58.9547			rs
Sr2AlNbO6	Sr	Al	Nb	O	s	p	d	1.44	0.535	0.64	0.5875	0.105	1.01041	1.02464	2	3	5	2	Sr2	Al3	Nb5	0		0	11.0303	28.4476	50.5728	0.95	1.61	1.6			1400			c	Fm-3m	7.7849						58.9752			rs	0.94
Sr2AlNbO6	Sr	Al	Nb	O	s	p	d	1.44	0.535	0.64	0.5875	0.105	1.01041	1.02464	2	3	5	2	Sr2	Al3	Nb5	0		0	11.0303	28.4476	50.5728	0.95	1.61	1.6	flux	air	1500			c	Fm-3m	7.7861						59.0024			rs	0.88
Sr2AlNbO6	Sr	Al	Nb	O	s	p	d	1.44	0.535	0.64	0.5875	0.105	1.01041	1.02464	2	3	5	2	Sr2	Al3	Nb5	0		0	11.0303	28.4476	50.5728	0.95	1.61	1.6	ss	air	1400			c		7.795						59.205
Sr2AlNbO6	Sr	Al	Nb	O	s	p	d	1.44	0.535	0.64	0.5875	0.105	1.01041	1.02464	2	3	5	2	Sr2	Al3	Nb5	0		0	11.0303	28.4476	50.5728	0.95	1.61	1.6	flux		1400
Sr2AlSbO6	Sr	Al	Sb	O	s	p	p	1.44	0.535	0.6	0.5675	0.065	1.02068	1.03505	2	3	5	2	Sr2	Al3	Sb5	0		10	11.0303	28.4476	55	0.95	1.61	2.05			1400			c		3.876						58.2306
Sr2AlSbO6	Sr	Al	Sb	O	s	p	p	1.44	0.535	0.6	0.5675	0.065	1.02068	1.03505	2	3	5	2	Sr2	Al3	Sb5	0		10	11.0303	28.4476	55	0.95	1.61	2.05	ss	air	273			c	Fm-3m	7.7634						58.4879			rs	0.96	light gray
Sr2AlSbO6	Sr	Al	Sb	O	s	p	p	1.44	0.535	0.6	0.5675	0.065	1.02068	1.03505	2	3	5	2	Sr2	Al3	Sb5	0		10	11.0303	28.4476	55	0.95	1.61	2.05	sol-gel	O2	1100			c	Fm-3m	7.7662						58.5512			rs	0.82	light gray
Sr2AlTaO6	Sr	Al	Ta	O	s	p	d	1.44	0.535	0.64	0.5875	0.105	1.01041	1.02464	2	3	5	2	Sr2	Al3	Ta5	0		0	11.0303	28.4476	48.272	0.95	1.61	1.5			1600			c	Fm-3m	7.7841						58.957			rs	0.9
Sr2AlTaO6	Sr	Al	Ta	O	s	p	d	1.44	0.535	0.64	0.5875	0.105	1.01041	1.02464	2	3	5	2	Sr2	Al3	Ta5	0		0	11.0303	28.4476	48.272	0.95	1.61	1.5	ss	air	1400			c		7.786						59.0002			rs
Sr2AlTaO6	Sr	Al	Ta	O	s	p	d	1.44	0.535	0.64	0.5875	0.105	1.01041	1.02464	2	3	5	2	Sr2	Al3	Ta5	0		0	11.0303	28.4476	48.272	0.95	1.61	1.5	flux	air	1500			c	Fm-3m	7.79133						59.1214			rs	0.92
Sr2AlTaO6	Sr	Al	Ta	O	s	p	d	1.44	0.535	0.64	0.5875	0.105	1.01041	1.02464	2	3	5	2	Sr2	Al3	Ta5	0		0	11.0303	28.4476	48.272	0.95	1.61	1.5	ss	air	1400			c		7.795						59.205
Sr2AlTaO6	Sr	Al	Ta	O	s	p	d	1.44	0.535	0.64	0.5875	0.105	1.01041	1.02464	2	3	5	2	Sr2	Al3	Ta5	0		0	11.0303	28.4476	48.272	0.95	1.61	1.5	ss		1500
Sr2CaIrO6	Sr	Ca	Ir	O	s	s	d	1.44	1		1	1	0.836743	0.848528	2	2	6	4	Sr2	Ca2	Ir6	0	0	3	11.0303	11.8717	72	0.95	1	2.2	HP	KClO3	900			m	P21/n	5.78	5.83	8.2		90.2		69.0792			rs?
Sr2CaIrO6	Sr	Ca	Ir	O	s	s	d	1.44	1		1	1	0.836743	0.848528	2	2	6	4	Sr2	Ca2	Ir6	0	0	3	11.0303	11.8717	72	0.95	1	2.2	ss	HP O2	880			m		5.783	5.828	8.199		90.26		69.0827			rs?		black
Sr2CaIrO6	Sr	Ca	Ir	O	s	s	d	1.44	1		1	1	0.836743	0.848528	2	2	6	4	Sr2	Ca2	Ir6	0	0	3	11.0303	11.8717	72	0.95	1	2.2	HP	O2	880			m	P21/n	5.783	5.8283	8.1997		90.26		69.0921			rs?
Sr2CaMoO6	Sr	Ca	Mo	O	s	s	d	1.44	1	0.59	0.795	0.41	0.91489	0.927776	2	2	6	4	Sr2	Ca2	Mo6	0	0	0	11.0303	11.8717	68.827	0.95	1	2.16	ss		1000			m		5.74	8.168	5.845		90		68.5097
Sr2CaMoO6	Sr	Ca	Mo	O	s	s	d	1.44	1	0.59	0.795	0.41	0.91489	0.927776	2	2	6	4	Sr2	Ca2	Mo6	0	0	0	11.0303	11.8717	68.827	0.95	1	2.16	nitrate decomp	air	1100			o		5.753	5.841	8.186				68.7691			rs
Sr2CaMoO6	Sr	Ca	Mo	O	s	s	d	1.44	1	0.59	0.795	0.41	0.91489	0.927776	2	2	6	4	Sr2	Ca2	Mo6	0	0	0	11.0303	11.8717	68.827	0.95	1	2.16						m	P21/n	5.76151	5.84449	8.18437		89.802		68.8978			rs
Sr2CaMoO6	Sr	Ca	Mo	O	s	s	d	1.44	1	0.59	0.795	0.41	0.91489	0.927776	2	2	6	4	Sr2	Ca2	Mo6	0	0	0	11.0303	11.8717	68.827	0.95	1	2.16	ss	air	1200			m	P21/n	5.76228	5.8479	8.18707		90.194		68.97			rs		bright yellow
Sr2CaMoO6	Sr	Ca	Mo	O	s	s	d	1.44	1	0.59	0.795	0.41	0.91489	0.927776	2	2	6	4	Sr2	Ca2	Mo6	0	0	0	11.0303	11.8717	68.827	0.95	1	2.16	ss		1300														rs?
Sr2CaOsO6	Sr	Ca	Os	O	s	s	d	1.44	1	0.545	0.7725	0.455	0.924365	0.937384	2	2	6	4	Sr2	Ca2	Os6	0	0	2	11.0303	11.8717	70.1	0.95	1	2.2			1000			c		8.21						69.1735			rs
Sr2CaOsO6	Sr	Ca	Os	O	s	s	d	1.44	1	0.545	0.7725	0.455	0.924365	0.937384	2	2	6	4	Sr2	Ca2	Os6	0	0	2	11.0303	11.8717	70.1	0.95	1	2.2	ss	air	1000			c		8.227						69.604			rs
Sr2CaReO6	Sr	Ca	Re	O	s	s	d	1.44	1	0.55	0.775	0.45	0.923303	0.936307	2	2	6	4	Sr2	Ca2	Re6	0	0	1	11.0303	11.8717	67	0.95	1	1.9	ss	vacuum	1000			c		8.198						68.8706			rs
Sr2CaReO6	Sr	Ca	Re	O	s	s	d	1.44	1	0.55	0.775	0.45	0.923303	0.936307	2	2	6	4	Sr2	Ca2	Re6	0	0	1	11.0303	11.8717	67	0.95	1	1.9	ss	N2	1000			m		8.17	8.15	8.17		90.13		68.0003			rs?
Sr2CaReO6	Sr	Ca	Re	O	s	s	d	1.44	1	0.55	0.775	0.45	0.923303	0.936307	2	2	6	4	Sr2	Ca2	Re6	0	0	1	11.0303	11.8717	67	0.95	1	1.9	ss	vacuum	900			m	P21/n	5.7582	5.8346	8.1787		90.245		68.6939			rs	0.99
Sr2CaReO6	Sr	Ca	Re	O	s	s	d	1.44	1	0.55	0.775	0.45	0.923303	0.936307	2	2	6	4	Sr2	Ca2	Re6	0	0	1	11.0303	11.8717	67	0.95	1	1.9						o		5.76	8.21	5.85				69.161			rs
Sr2CaTeO6	Sr	Ca	Te	O	s	s	p	1.44	1	0.56	0.78	0.44	0.921185	0.934159	2	2	6	4	Sr2	Ca2	Te6	0	0	10	11.0303	11.8717	69.1	0.95	1	2.1			1300			c		4.1						68.921			rs?
Sr2CaTeO6	Sr	Ca	Te	O	s	s	p	1.44	1	0.56	0.78	0.44	0.921185	0.934159	2	2	6	4	Sr2	Ca2	Te6	0	0	10	11.0303	11.8717	69.1	0.95	1	2.1	ss	air	1200			m	P21/n	5.79919	5.83756	8.2175		90.194		69.5466			rs		pale yellow
Sr2CaTeO6	Sr	Ca	Te	O	s	s	p	1.44	1	0.56	0.78	0.44	0.921185	0.934159	2	2	6	4	Sr2	Ca2	Te6	0	0	10	11.0303	11.8717	69.1	0.95	1	2.1	ss					c											rs?
Sr2CaUO6	Sr	Ca	U	O	s	s	f	1.44	1	0.73	0.865	0.27	0.886615	0.899103	2	2	6	4	Sr2	Ca2	U6	0	0		11.0303	11.8717	62	0.95	1	1.38	ss	air	1000			o		6.06	8.46	5.93				76.0042			rs		yellow-orange
Sr2CaUO6	Sr	Ca	U	O	s	s	f	1.44	1	0.73	0.865	0.27	0.886615	0.899103	2	2	6	4	Sr2	Ca2	U6	0	0		11.0303	11.8717	62	0.95	1	1.38	ss	air	1100			m	P21/n	5.9377	6.0734	8.4563		90.14		76.2376			rs
Sr2CaWO6	Sr	Ca	W	O	s	s	d	1.44	1	0.6	0.8	0.4	0.912811	0.925667	2	2	6	4	Sr2	Ca2	W6	0	0	0	11.0303	11.8717	64.77	0.95	1	2.36						~c?		8.2						68.921			rs
Sr2CaWO6	Sr	Ca	W	O	s	s	d	1.44	1	0.6	0.8	0.4	0.912811	0.925667	2	2	6	4	Sr2	Ca2	W6	0	0	0	11.0303	11.8717	64.77	0.95	1	2.36	ss	air	1100			m	P21/n	5.7672	5.8506	8.1931		90.165		69.1117			rs?
Sr2CaWO6	Sr	Ca	W	O	s	s	d	1.44	1	0.6	0.8	0.4	0.912811	0.925667	2	2	6	4	Sr2	Ca2	W6	0	0	0	11.0303	11.8717	64.77	0.95	1	2.36						m	P21/n	5.76861	5.85008	8.19467		90.166		69.1357			rs
Sr2CaWO6	Sr	Ca	W	O	s	s	d	1.44	1	0.6	0.8	0.4	0.912811	0.925667	2	2	6	4	Sr2	Ca2	W6	0	0	0	11.0303	11.8717	64.77	0.95	1	2.36	ss	air	1400			o		5.78	8.22	5.86				69.6045			rs
Sr2CaWO6	Sr	Ca	W	O	s	s	d	1.44	1	0.6	0.8	0.4	0.912811	0.925667	2	2	6	4	Sr2	Ca2	W6	0	0	0	11.0303	11.8717	64.77	0.95	1	2.36	ss		1300														rs?
Sr2CdMoO6	Sr	Cd	Mo	O	s	d	d	1.44	0.95	0.59	0.77	0.36	0.92543	0.938464	2	2	6	4	Sr2	Cd2	Mo6	0	10	0	11.0303	16.9083	68.827	0.95	1.69	2.16	ss		900					4.09						68.4179
Sr2CdReO6	Sr	Cd	Re	O	s	d	d	1.44	0.95	0.55	0.75	0.4	0.934039	0.947194	2	2	6	4	Sr2	Cd2	Re6	0	10	1	11.0303	16.9083	67	0.95	1.69	1.9		vacuum	1000			o		5.73	8.16	5.81				67.9143			rs
Sr2CdTeO6	Sr	Cd	Te	O	s	d	p	1.44	0.95	0.56	0.755	0.39	0.931872	0.944997	2	2	6	4	Sr2	Cd2	Te6	0	10	10	11.0303	16.9083	69.1	0.95	1.69	2.1			1150			m		4.1	4.04	4.1		91.2		67.8975			rs?
Sr2CdTeO6	Sr	Cd	Te	O	s	d	p	1.44	0.95	0.56	0.755	0.39	0.931872	0.944997	2	2	6	4	Sr2	Cd2	Te6	0	10	10	11.0303	16.9083	69.1	0.95	1.69	2.1	ss					m											rs?
Sr2CdUO6	Sr	Cd	U	O	s	d	f	1.44	0.95	0.73	0.84	0.22	0.89651	0.909137	2	2	6	4	Sr2	Cd2	U6	0	10		11.0303	16.9083	62	0.95	1.69	1.38	ss	air	1000			o		6.03	8.42	5.91				75.0165			rs
Sr2CdWO6	Sr	Cd	W	O	s	d	d	1.44	0.95	0.6	0.775	0.35	0.923303	0.936307	2	2	6	4	Sr2	Cd2	W6	0	10	0	11.0303	16.9083	64.77	0.95	1.69	2.36	ss	air	273			m	P21/n	5.7463	5.8189	8.1465		90.071		68.0989			rs
Sr2CdWO6	Sr	Cd	W	O	s	d	d	1.44	0.95	0.6	0.775	0.35	0.923303	0.936307	2	2	6	4	Sr2	Cd2	W6	0	10	0	11.0303	16.9083	64.77	0.95	1.69	2.36						m	P21/n	5.7504	5.8173	8.1519		89.952		68.1739			rs
Sr2CeHfO6	Sr	Ce	Hf	O	s	f	d	1.44	0.87	0.71	0.79	0.16	0.916979	0.929894	2	4	4	0	Sr2	Ce4	Hf4	0	0	0	11.0303	36.906	33.37	0.95	1.12	1.3	ss		1600			m		4.197	4.197	4.21		90.25		74.1576
Sr2CeIrO6	Sr	Ce	Ir	O	s	f	d	1.44	0.87	0.625	0.7475	0.245	0.935126	0.948297	2	4	4	0	Sr2	Ce4	Ir4	0	0	5	11.0303	36.906	40	0.95	1.12	2.2	ss	air	1200			m	P21/n	5.8341	5.8436	8.2559		90.195		70.3649			rs	1
Sr2CeIrO6	Sr	Ce	Ir	O	s	f	d	1.44	0.87	0.625	0.7475	0.245	0.935126	0.948297	2	4	4	0	Sr2	Ce4	Ir4	0	0	5	11.0303	36.906	40	0.95	1.12	2.2	ss	air	1200			m	P21/n	5.835	5.846	8.26		90.21		70.4396			rs?
Sr2CeRuO6	Sr	Ce	Ru	O	s	f	d	1.44	1.01	0.565	0.7875	0.445	0.918027	0.930957	2	3	5	2	Sr2	Ce3	Ru5	0	0	3	11.0303	20.1974	59	0.95	1.12	2.2						h?
Sr2CeTaO6	Sr	Ce	Ta	O	s	f	d	1.44	0.87	0.68	0.775	0.19	0.923303	0.936307	2	4	4	0	Sr2	Ce4	Ta4	0	0	1	11.0303	36.906	35	0.95	1.12	1.5	ss	air	1370			m	P21/n	5.83	5.834	8.239		90.115		70.0565			rs
Sr2CeZrO6	Sr	Ce	Zr	O	s	f	d	1.44	0.87	0.72	0.795	0.15	0.91489	0.927776	2	4	4	0	Sr2	Ce4	Zr4	0	0	0	11.0303	36.906	34.4184	0.95	1.12	1.33	ss		1600			o		5.92	5.95	8.4				73.9704
Sr2CoIrO6	Sr	Co	Ir	O	s	d	d	1.44	0.61	0.57	0.59	0.04	1.00914	1.02335	2	3	5	2	Sr2	Co3	Ir5	0	6	4	11.0303	33.5	57	0.95	1.88	2.2	ss	air	1200			m	I2/m	5.5285	5.5508	7.8427		90.297		60.1676		166.3	rs	0.86
Sr2CoIrO6	Sr	Co	Ir	O	s	d	d	1.44	0.61	0.57	0.59	0.04	1.00914	1.02335	2	3	5	2	Sr2	Co3	Ir5	0	6	4	11.0303	33.5	57	0.95	1.88	2.2	ss	air	1100			m	I2/m	5.5642	5.5315	7.8462		90.05		60.3733			rs	0.736
Sr2CoMnO6	Sr	Co	Mn	O	s	d	d	1.44	0.53	0.53	0.53	0	1.04051	1.05516	2	4	4	0	Sr2	Co4	Mn4	0	5	3	11.0303	51.27	51.2	0.95	1.88	1.55						c		3.838						56.5347
Sr2CoMoO6	Sr	Co	Mo	O	s	d	d	1.44	0.745	0.59	0.6675	0.155	0.97131	0.98499	2	2	6	4	Sr2	Co2	Mo6	0	7	0	11.0303	17.0844	68.827	0.95	1.88	2.16	sol-gel	air	1150			te	I4/m	5.56503		7.9481				61.5373	1.00991	170.867	rs		black
Sr2CoMoO6	Sr	Co	Mo	O	s	d	d	1.44	0.745	0.59	0.6675	0.155	0.97131	0.98499	2	2	6	4	Sr2	Co2	Mo6	0	7	0	11.0303	17.0844	68.827	0.95	1.88	2.16	ss	air	273			te		7.85		7.932				61.0987	1.01045		rs?
Sr2CoMoO6	Sr	Co	Mo	O	s	d	d	1.44	0.745	0.59	0.6675	0.155	0.97131	0.98499	2	2	6	4	Sr2	Co2	Mo6	0	7	0	11.0303	17.0844	68.827	0.95	1.88	2.16	sol-gel	air	1250			te	I4/m	5.5726		7.9575				61.7778	1.00973	170.087	rs	0.942
Sr2CoMoO6	Sr	Co	Mo	O	s	d	d	1.44	0.745	0.59	0.6675	0.155	0.97131	0.98499	2	2	6	4	Sr2	Co2	Mo6	0	7	0	11.0303	17.0844	68.827	0.95	1.88	2.16	ss	vacuum	1200			te	I4/mmm	5.57313		7.9575				61.7896	1.00963		rs
Sr2CoMoO6	Sr	Co	Mo	O	s	d	d	1.44	0.745	0.59	0.6675	0.155	0.97131	0.98499	2	2	6	4	Sr2	Co2	Mo6	0	7	0	11.0303	17.0844	68.827	0.95	1.88	2.16	nitrate decomp	air	1150			te		5.562		7.941				61.4154	1.00955		rs
Sr2CoMoO6	Sr	Co	Mo	O	s	d	d	1.44	0.745	0.59	0.6675	0.155	0.97131	0.98499	2	2	6	4	Sr2	Co2	Mo6	0	7	0	11.0303	17.0844	68.827	0.95	1.88	2.16	ss	air	273			te	I4/m	5.5616		7.947				61.4529	1.01039		rs	0.99
Sr2CoMoO6	Sr	Co	Mo	O	s	d	d	1.44	0.745	0.59	0.6675	0.155	0.97131	0.98499	2	2	6	4	Sr2	Co2	Mo6	0	7	0	11.0303	17.0844	68.827	0.95	1.88	2.16	ss	Air	1200			te	I4/mmm	5.5657		7.9482				61.5529	1.0098		rs
Sr2CoMoO6	Sr	Co	Mo	O	s	d	d	1.44	0.745	0.59	0.6675	0.155	0.97131	0.98499	2	2	6	4	Sr2	Co2	Mo6	0	7	0	11.0303	17.0844	68.827	0.95	1.88	2.16	ss	air or Ar	1400			te		3.9367		3.9764				61.6247	1.01008		rs?		black
Sr2CoMoO6	Sr	Co	Mo	O	s	d	d	1.44	0.745	0.59	0.6675	0.155	0.97131	0.98499	2	2	6	4	Sr2	Co2	Mo6	0	7	0	11.0303	17.0844	68.827	0.95	1.88	2.16	sol-gel	air	1200			tr	I-1	5.5695	5.5688	7.95114	89.982	89.959	89.998	61.6525			rs	0.89
Sr2CoNbO6	Sr	Co	Nb	O	s	d	d	1.44	0.61	0.64	0.625	0.03	0.991695	1.00566	2	3	5	2	Sr2	Co3	Nb5	0	6	0	11.0303	33.5	50.5728	0.95	1.88	1.6	ss	air/O2	1300			c		3.93						60.6985			d	0
Sr2CoNbO6	Sr	Co	Nb	O	s	d	d	1.44	0.61	0.64	0.625	0.03	0.991695	1.00566	2	3	5	2	Sr2	Co3	Nb5	0	6	0	11.0303	33.5	50.5728	0.95	1.88	1.6	ss	air	1300			c		3.944						61.3495			d	0
Sr2CoNbO6	Sr	Co	Nb	O	s	d	d	1.44	0.61	0.64	0.625	0.03	0.991695	1.00566	2	3	5	2	Sr2	Co3	Nb5	0	6	0	11.0303	33.5	50.5728	0.95	1.88	1.6	ss	air	1290			te	I4/m	5.5851		7.9069				61.6607	1.00106	175.55	rs	0.28
Sr2CoOsO6	Sr	Co	Os	O	s	d	d	1.44	0.745	0.545	0.645	0.2	0.981997	0.995828	2	2	6	4	Sr2	Co2	Os6	0	7	2	11.0303	17.0844	70.1	0.95	1.88	2.2	ss	HP O2	1000			te	I4/m	5.54786		7.9565				61.2228			rs	1
Sr2CoOsO6	Sr	Co	Os	O	s	d	d	1.44	0.745	0.545	0.645	0.2	0.981997	0.995828	2	2	6	4	Sr2	Co2	Os6	0	7	2	11.0303	17.0844	70.1	0.95	1.88	2.2						te		7.86		7.92				61.1618	1.00763		rs?
Sr2CoReO6	Sr	Co	Re	O	s	d	d	1.44	0.745	0.55	0.6475	0.195	0.980798	0.994612	2	2	6	4	Sr2	Co2	Re6	0	7	1	11.0303	17.0844	67	0.95	1.88	1.9	ss	Ar/vacuum	1400			te	I4/m	5.56591		7.95083				61.5779	1.01009	170.853	rs	1
Sr2CoReO6	Sr	Co	Re	O	s	d	d	1.44	0.745	0.55	0.6475	0.195	0.980798	0.994612	2	2	6	4	Sr2	Co2	Re6	0	7	1	11.0303	17.0844	67	0.95	1.88	1.9	ss	Ar	1230			te	I4/m	5.5715		7.9594				61.7682	1.01017		rs	1
Sr2CoReO6	Sr	Co	Re	O	s	d	d	1.44	0.745	0.55	0.6475	0.195	0.980798	0.994612	2	2	6	4	Sr2	Co2	Re6	0	7	1	11.0303	17.0844	67	0.95	1.88	1.9	ss	N2	1000			te		7.87		7.93				61.395	1.00762		rs?
Sr2CoReO6	Sr	Co	Re	O	s	d	d	1.44	0.745	0.55	0.6475	0.195	0.980798	0.994612	2	2	6	4	Sr2	Co2	Re6	0	7	1	11.0303	17.0844	67	0.95	1.88	1.9								7.87		7.93				61.395
Sr2CoReO6	Sr	Co	Re	O	s	d	d	1.44	0.745	0.55	0.6475	0.195	0.980798	0.994612	2	2	6	4	Sr2	Co2	Re6	0	7	1	11.0303	17.0844	67	0.95	1.88	1.9	sol-gel	N2	1200			te	I4/m	5.5631		7.9516				61.5217	1.0107	170.647	rs	0.98	black
Sr2CoReO6	Sr	Co	Re	O	s	d	d	1.44	0.745	0.55	0.6475	0.195	0.980798	0.994612	2	2	6	4	Sr2	Co2	Re6	0	7	1	11.0303	17.0844	67	0.95	1.88	1.9		vacuum	1000			te		7.88		7.98				61.9392	1.01269		rs
Sr2CoRuO6	Sr	Co	Ru	O	s	d	d	1.44	0.745	0.4725	0.60875	0.2725	0.999718	1.0138	2	2	6	4	Sr2	Co2	Ru6	0	7	2	11.0303	17.0844	76	0.95	1.88	2.2	ss	air	1200			m	I2/c	5.5279	5.5396	7.8305		90.21		59.9467		169.1	d	0
Sr2CoRuO6	Sr	Co	Ru	O	s	d	d	1.44	0.745	0.4725	0.60875	0.2725	0.999718	1.0138	2	2	6	4	Sr2	Co2	Ru6	0	7	2	11.0303	17.0844	76	0.95	1.88	2.2	ss	air	1150			m	I2/c										d	0
Sr2CoRuO6	Sr	Co	Ru	O	s	d	d	1.44	0.745	0.4725	0.60875	0.2725	0.999718	1.0138	2	2	6	4	Sr2	Co2	Ru6	0	7	2	11.0303	17.0844	76	0.95	1.88	2.2	ss	air	1050			m	I2/c	5.52699	5.52319	7.84166		90.1714		59.8446			d	0
Sr2CoSbO6	Sr	Co	Sb	O	s	d	p	1.44	0.61	0.6	0.605	0.01	1.00159	1.01569	2	3	5	2	Sr2	Co3	Sb5	0	6	10	11.0303	33.5	55	0.95	1.88	2.05	ss	air	1200			m	P21/n	5.5822	5.6011	7.8981		89.839		61.7362		164	rs	0.5
Sr2CoSbO6	Sr	Co	Sb	O	s	d	p	1.44	0.61	0.6	0.605	0.01	1.00159	1.01569	2	3	5	2	Sr2	Co3	Sb5	0	6	10	11.0303	33.5	55	0.95	1.88	2.05	freeze-dry, ss	air + oxidation	1350			r	R-3m	5.5844			60.17			61.8092			rs	0.544
Sr2CoSbO6	Sr	Co	Sb	O	s	d	p	1.44	0.61	0.6	0.605	0.01	1.00159	1.01569	2	3	5	2	Sr2	Co3	Sb5	0	6	10	11.0303	33.5	55	0.95	1.88	2.05	ss	air/O2	1300			c		7.88						61.163			rs
Sr2CoSbO6	Sr	Co	Sb	O	s	d	p	1.44	0.61	0.6	0.605	0.01	1.00159	1.01569	2	3	5	2	Sr2	Co3	Sb5	0	6	10	11.0303	33.5	55	0.95	1.88	2.05	sol-gel	O2	1040			r	R-3c	5.58054			60.134			61.6311		169.26	d	0
Sr2CoSbO6	Sr	Co	Sb	O	s	d	p	1.44	0.61	0.6	0.605	0.01	1.00159	1.01569	2	3	5	2	Sr2	Co3	Sb5	0	6	10	11.0303	33.5	55	0.95	1.88	2.05	ss	air	273			r	R-3	5.6058		13.6758				62.0308			rs	0.6	dark blue
Sr2CoSbO6	Sr	Co	Sb	O	s	d	p	1.44	0.61	0.6	0.605	0.01	1.00159	1.01569	2	3	5	2	Sr2	Co3	Sb5	0	6	10	11.0303	33.5	55	0.95	1.88	2.05
Sr2CoTaO6	Sr	Co	Ta	O	s	d	d	1.44	0.61	0.64	0.625	0.03	0.991695	1.00566	2	3	5	2	Sr2	Co3	Ta5	0	6	0	11.0303	33.5	48.272	0.95	1.88	1.5	ss	air	1200			c		3.951						61.6767			d	0
Sr2CoTaO6	Sr	Co	Ta	O	s	d	d	1.44	0.61	0.64	0.625	0.03	0.991695	1.00566	2	3	5	2	Sr2	Co3	Ta5	0	6	0	11.0303	33.5	48.272	0.95	1.88	1.5	ss		1200			te		5.5865		7.9098				61.7142			d	0
Sr2CoTaO6	Sr	Co	Ta	O	s	d	d	1.44	0.61	0.64	0.625	0.03	0.991695	1.00566	2	3	5	2	Sr2	Co3	Ta5	0	6	0	11.0303	33.5	48.272	0.95	1.88	1.5						c	Fm-3m	7.928						62.2875			rs	0.1
Sr2CoTeO6	Sr	Co	Te	O	s	d	p	1.44	0.745	0.56	0.6525	0.185	0.978408	0.992189	2	2	6	4	Sr2	Co2	Te6	0	7	10	11.0303	17.0844	69.1	0.95	1.88	2.1	ss					m	P21/n							61.6299			rs
Sr2CoTeO6	Sr	Co	Te	O	s	d	p	1.44	0.745	0.56	0.6525	0.185	0.978408	0.992189	2	2	6	4	Sr2	Co2	Te6	0	7	10	11.0303	17.0844	69.1	0.95	1.88	2.1			1300			m		3.96	3.94	3.96		90.4		61.784			rs?
Sr2CoTeO6	Sr	Co	Te	O	s	d	p	1.44	0.745	0.56	0.6525	0.185	0.978408	0.992189	2	2	6	4	Sr2	Co2	Te6	0	7	10	11.0303	17.0844	69.1	0.95	1.88	2.1	ss	air	950			m	P21/n	5.6417	5.6063	7.9234		90.117		62.6523		165.667	rs	1	violet
Sr2CoTeO6	Sr	Co	Te	O	s	d	p	1.44	0.745	0.56	0.6525	0.185	0.978408	0.992189	2	2	6	4	Sr2	Co2	Te6	0	7	10	11.0303	17.0844	69.1	0.95	1.88	2.1	freeze-dry, ss	air	1000			m	P21/n	5.6437	5.6096	7.9271		90.059		62.7408		165.8	rs	1
Sr2CoTeO6	Sr	Co	Te	O	s	d	p	1.44	0.745	0.56	0.6525	0.185	0.978408	0.992189	2	2	6	4	Sr2	Co2	Te6	0	7	10	11.0303	17.0844	69.1	0.95	1.88	2.1	ss					m											rs?
Sr2CoTiO6	Sr	Co	Ti	O	s	d	d	1.44	0.53	0.605	0.5675	0.075	1.02068	1.03505	2	4	4	0	Sr2	Co4	Ti4	0	5	0	11.0303	51.27	43.2672	0.95	1.88	1.54	ss	O2	1350			te	I4/m	5.516		7.796				59.3008	0.999384		rs/d	0.07
Sr2CoUO6	Sr	Co	U	O	s	d	f	1.44	0.745	0.73	0.7375	0.015	0.939501	0.952733	2	2	6	4	Sr2	Co2	U6	0	7		11.0303	17.0844	62	0.95	1.88	1.38	ss	air	1000			c	Fm-3m	8.19						68.6692			rs
Sr2CoUO6	Sr	Co	U	O	s	d	f	1.44	0.745	0.73	0.7375	0.015	0.939501	0.952733	2	2	6	4	Sr2	Co2	U6	0	7		11.0303	17.0844	62	0.95	1.88	1.38	ss	air	1150			m	P21/n	5.7916	5.8034	8.179		90.1455		68.7258		157.2	rs	1	black
Sr2CoWO6	Sr	Co	W	O	s	d	d	1.44	0.745	0.6	0.6725	0.145	0.968967	0.982614	2	2	6	4	Sr2	Co2	W6	0	7	0	11.0303	17.0844	64.77	0.95	1.88	2.36	ss	air	1150			te	I4/m	5.58277		7.9774				62.1585	1.01041	170.347	rs	0.914	yellow
Sr2CoWO6	Sr	Co	W	O	s	d	d	1.44	0.745	0.6	0.6725	0.145	0.968967	0.982614	2	2	6	4	Sr2	Co2	W6	0	7	0	11.0303	17.0844	64.77	0.95	1.88	2.36	ss	air or Ar	1400			te		3.9502		3.9746				62.02	1.00618		rs?		dark brown
Sr2CoWO6	Sr	Co	W	O	s	d	d	1.44	0.745	0.6	0.6725	0.145	0.968967	0.982614	2	2	6	4	Sr2	Co2	W6	0	7	0	11.0303	17.0844	64.77	0.95	1.88	2.36	ss	vacuum	1250			te		7.89		7.98				62.0965	1.01141		rs
Sr2CoWO6	Sr	Co	W	O	s	d	d	1.44	0.745	0.6	0.6725	0.145	0.968967	0.982614	2	2	6	4	Sr2	Co2	W6	0	7	0	11.0303	17.0844	64.77	0.95	1.88	2.36	ss	air	1000			m	P21/n / I4/m	5.6206 / 5.5793	5.5942	7.9037 / 7.9796		90.035		62.1285		?	rs
Sr2CoWO6	Sr	Co	W	O	s	d	d	1.44	0.745	0.6	0.6725	0.145	0.968967	0.982614	2	2	6	4	Sr2	Co2	W6	0	7	0	11.0303	17.0844	64.77	0.95	1.88	2.36	ss	air	1100			te	I4/m	5.582		7.9774				62.1414	1.01055	168.4	rs	1
Sr2CoWO6	Sr	Co	W	O	s	d	d	1.44	0.745	0.6	0.6725	0.145	0.968967	0.982614	2	2	6	4	Sr2	Co2	W6	0	7	0	11.0303	17.0844	64.77	0.95	1.88	2.36	ss	air	1000			te	I4/m	5.5854		7.9837				62.2663	1.01073		rs
Sr2CoWO6	Sr	Co	W	O	s	d	d	1.44	0.745	0.6	0.6725	0.145	0.968967	0.982614	2	2	6	4	Sr2	Co2	W6	0	7	0	11.0303	17.0844	64.77	0.95	1.88	2.36																	rs?
Sr2CrMnO6	Sr	Cr	Mn	O	s	d	d	1.44	0.55	0.53	0.54	0.02	1.03515	1.04973	2	4	4	0	Sr2	Cr4	Mn4	0	2	3	11.0303	49.16	51.2	0.95	1.66	1.55						h
Sr2CrMoO6	Sr	Cr	Mo	O	s	d	d	1.44	0.615	0.61	0.6125	0.005	0.997855	1.01191	2	3	5	2	Sr2	Cr3	Mo5	0	3	1	11.0303	30.959	54.4167	0.95	1.66	2.16	ss	vacuum	1200			c	Fm-3m	7.8156						59.6756			rs
Sr2CrMoO6	Sr	Cr	Mo	O	s	d	d	1.44	0.615	0.61	0.6125	0.005	0.997855	1.01191	2	3	5	2	Sr2	Cr3	Mo5	0	3	1	11.0303	30.959	54.4167	0.95	1.66	2.16	floating-zone	Ar				te	I4/mmm	5.5688		7.9054				61.2896
Sr2CrMoO6	Sr	Cr	Mo	O	s	d	d	1.44	0.615	0.61	0.6125	0.005	0.997855	1.01191	2	3	5	2	Sr2	Cr3	Mo5	0	3	1	11.0303	30.959	54.4167	0.95	1.66	2.16	ss	H2/Ar	1200			c	Fm-3m										rs	0.65
Sr2CrMoO6	Sr	Cr	Mo	O	s	d	d	1.44	0.615	0.61	0.6125	0.005	0.997855	1.01191	2	3	5	2	Sr2	Cr3	Mo5	0	3	1	11.0303	30.959	54.4167	0.95	1.66	2.16	ss	H2/N2	1500			c	Fm-3m										rs	0.134
Sr2CrMoO6	Sr	Cr	Mo	O	s	d	d	1.44	0.615	0.61	0.6125	0.005	0.997855	1.01191	2	3	5	2	Sr2	Cr3	Mo5	0	3	1	11.0303	30.959	54.4167	0.95	1.66	2.16	ss	H2/Ar	1250														rs/d	0.66
Sr2CrMoO6	Sr	Cr	Mo	O	s	d	d	1.44	0.615	0.61	0.6125	0.005	0.997855	1.01191	2	3	5	2	Sr2	Cr3	Mo5	0	3	1	11.0303	30.959	54.4167	0.95	1.66	2.16	ss	vacuum	1000			c		7.82						59.7765			rs/d		black
Sr2CrMoO6	Sr	Cr	Mo	O	s	d	d	1.44	0.615	0.61	0.6125	0.005	0.997855	1.01191	2	3	5	2	Sr2	Cr3	Mo5	0	3	1	11.0303	30.959	54.4167	0.95	1.66	2.16
Sr2CrNbO6	Sr	Cr	Nb	O	s	d	d	1.44	0.615	0.64	0.6275	0.025	0.990473	1.00442	2	3	5	2	Sr2	Cr3	Nb5	0	3	0	11.0303	30.959	50.5728	0.95	1.66	1.6	ss	air	1200			c	Fm-3m	7.8761						61.0722			rs	0.52
Sr2CrNbO6	Sr	Cr	Nb	O	s	d	d	1.44	0.615	0.64	0.6275	0.025	0.990473	1.00442	2	3	5	2	Sr2	Cr3	Nb5	0	3	0	11.0303	30.959	50.5728	0.95	1.66	1.6	ss	air/O2	1300			c		7.87						60.9304			rs
Sr2CrNbO6	Sr	Cr	Nb	O	s	d	d	1.44	0.615	0.64	0.6275	0.025	0.990473	1.00442	2	3	5	2	Sr2	Cr3	Nb5	0	3	0	11.0303	30.959	50.5728	0.95	1.66	1.6	ss/solution	N2	1300			c	Fm-3m	7.8732						61.0048			rs/d	0.58	brown
Sr2CrNbO6	Sr	Cr	Nb	O	s	d	d	1.44	0.615	0.64	0.6275	0.025	0.990473	1.00442	2	3	5	2	Sr2	Cr3	Nb5	0	3	0	11.0303	30.959	50.5728	0.95	1.66	1.6	ss	air	1200			c	Fm-3m	7.8788						61.135			rs	0.84	green
Sr2CrNbO6	Sr	Cr	Nb	O	s	d	d	1.44	0.615	0.64	0.6275	0.025	0.990473	1.00442	2	3	5	2	Sr2	Cr3	Nb5	0	3	0	11.0303	30.959	50.5728	0.95	1.66	1.6	ss	air or Ar	1400			c		3.9421						61.2608					light green
Sr2CrOsO6	Sr	Cr	Os	O	s	d	d	1.44	0.615	0.575	0.595	0.04	1.00661	1.02079	2	3	5	2	Sr2	Cr3	Os5	0	3	3	11.0303	30.959	55	0.95	1.66	2.2	ss	vacuum	1000			r	R-3	5.5181		13.4995				59.3303			rs
Sr2CrOsO6	Sr	Cr	Os	O	s	d	d	1.44	0.615	0.575	0.595	0.04	1.00661	1.02079	2	3	5	2	Sr2	Cr3	Os5	0	3	3	11.0303	30.959	55	0.95	1.66	2.2		vacuum	1000			c		7.84						60.2363
Sr2CrReO6	Sr	Cr	Re	O	s	d	d	1.44	0.615	0.58	0.5975	0.035	1.00535	1.01951	2	3	5	2	Sr2	Cr3	Re5	0	3	2	11.0303	30.959	51.9	0.95	1.66	1.9	ss	vacuum/Ar	1400			te	I4/mmm	5.52		7.82				59.5696	1.00173		rs	0.84
Sr2CrReO6	Sr	Cr	Re	O	s	d	d	1.44	0.615	0.58	0.5975	0.035	1.00535	1.01951	2	3	5	2	Sr2	Cr3	Re5	0	3	2	11.0303	30.959	51.9	0.95	1.66	1.9	ss	Ar/vacuum	1400			te	I4/m	5.52718		7.80912				59.6416	0.999041	179.8	rs	0.766
Sr2CrReO6	Sr	Cr	Re	O	s	d	d	1.44	0.615	0.58	0.5975	0.035	1.00535	1.01951	2	3	5	2	Sr2	Cr3	Re5	0	3	2	11.0303	30.959	51.9	0.95	1.66	1.9	ss	ampoule	1000			c	Fm-3m	7.82						59.7765			rs
Sr2CrReO6	Sr	Cr	Re	O	s	d	d	1.44	0.615	0.58	0.5975	0.035	1.00535	1.01951	2	3	5	2	Sr2	Cr3	Re5	0	3	2	11.0303	30.959	51.9	0.95	1.66	1.9						c		7.82						59.7765			rs	?
Sr2CrReO6	Sr	Cr	Re	O	s	d	d	1.44	0.615	0.58	0.5975	0.035	1.00535	1.01951	2	3	5	2	Sr2	Cr3	Re5	0	3	2	11.0303	30.959	51.9	0.95	1.66	1.9	ss	vacuum	1000			te	P42/m	5.5319		7.8233				59.852	1		rs	0.84
Sr2CrReO6	Sr	Cr	Re	O	s	d	d	1.44	0.615	0.58	0.5975	0.035	1.00535	1.01951	2	3	5	2	Sr2	Cr3	Re5	0	3	2	11.0303	30.959	51.9	0.95	1.66	1.9
Sr2CrReO6	Sr	Cr	Re	O	s	d	d	1.44	0.615	0.58	0.5975	0.035	1.00535	1.01951	2	3	5	2	Sr2	Cr3	Re5	0	3	2	11.0303	30.959	51.9	0.95	1.66	1.9	ss	Ar	1000			c	Fm-3m										rs	0.9
Sr2CrRuO6	Sr	Cr	Ru	O	s	d	d	1.44	0.615	0.565	0.59	0.05	1.00914	1.02335	2	3	5	2	Sr2	Cr3	Ru5	0	3	3	11.0303	30.959	59	0.95	1.66	2.2	HP		1100			c	Pm-3m	3.88861						58.8008			d	0
Sr2CrSbO6	Sr	Cr	Sb	O	s	d	p	1.44	0.615	0.6	0.6075	0.015	1.00034	1.01443	2	3	5	2	Sr2	Cr3	Sb5	0	3	10	11.0303	30.959	55	0.95	1.66	2.05	ss	air	1150			m	P21/n	5.5762	5.35541	7.8474		89.982		58.5864		169.2	rs	0.94
Sr2CrSbO6	Sr	Cr	Sb	O	s	d	p	1.44	0.615	0.6	0.6075	0.015	1.00034	1.01443	2	3	5	2	Sr2	Cr3	Sb5	0	3	10	11.0303	30.959	55	0.95	1.66	2.05	sol-gel	O2/Ar	1200			m	I2/m	5.56995	5.55043	7.84095		90		60.602		169.693	rs	0.54
Sr2CrSbO6	Sr	Cr	Sb	O	s	d	p	1.44	0.615	0.6	0.6075	0.015	1.00034	1.01443	2	3	5	2	Sr2	Cr3	Sb5	0	3	10	11.0303	30.959	55	0.95	1.66	2.05	ss	air	1100			c		7.862						60.7448					brown
Sr2CrSbO6	Sr	Cr	Sb	O	s	d	p	1.44	0.615	0.6	0.6075	0.015	1.00034	1.01443	2	3	5	2	Sr2	Cr3	Sb5	0	3	10	11.0303	30.959	55	0.95	1.66	2.05	ss	air	273			m	I2/m	5.5574	5.5782	7.8506		90.06		60.8427		171.667	rs	0.99
Sr2CrSbO6	Sr	Cr	Sb	O	s	d	p	1.44	0.615	0.6	0.6075	0.015	1.00034	1.01443	2	3	5	2	Sr2	Cr3	Sb5	0	3	10	11.0303	30.959	55	0.95	1.66	2.05	ss	air/O2	1300			c		7.87						60.9304			rs
Sr2CrSbO6	Sr	Cr	Sb	O	s	d	p	1.44	0.615	0.6	0.6075	0.015	1.00034	1.01443	2	3	5	2	Sr2	Cr3	Sb5	0	3	10	11.0303	30.959	55	0.95	1.66	2.05			1400			c		3.938						61.0699
Sr2CrSbO6	Sr	Cr	Sb	O	s	d	p	1.44	0.615	0.6	0.6075	0.015	1.00034	1.01443	2	3	5	2	Sr2	Cr3	Sb5	0	3	10	11.0303	30.959	55	0.95	1.66	2.05
Sr2CrTaO6	Sr	Cr	Ta	O	s	d	d	1.44	0.615	0.64	0.6275	0.025	0.990473	1.00442	2	3	5	2	Sr2	Cr3	Ta5	0	3	0	11.0303	30.959	48.272	0.95	1.66	1.5	ss	air	1500			te	I4/m	5.5752		7.8808				61.2394	0.999528	175.2	rs	0.6
Sr2CrTaO6	Sr	Cr	Ta	O	s	d	d	1.44	0.615	0.64	0.6275	0.025	0.990473	1.00442	2	3	5	2	Sr2	Cr3	Ta5	0	3	0	11.0303	30.959	48.272	0.95	1.66	1.5	ss	N2	1350			c	Fm-3m	7.8837						61.2492			rs	0.328
Sr2CrTaO6	Sr	Cr	Ta	O	s	d	d	1.44	0.615	0.64	0.6275	0.025	0.990473	1.00442	2	3	5	2	Sr2	Cr3	Ta5	0	3	0	11.0303	30.959	48.272	0.95	1.66	1.5	ss	air	1200			c	Fm-3m	7.891						61.4195			rs	?
Sr2CrTaO6	Sr	Cr	Ta	O	s	d	d	1.44	0.615	0.64	0.6275	0.025	0.990473	1.00442	2	3	5	2	Sr2	Cr3	Ta5	0	3	0	11.0303	30.959	48.272	0.95	1.66	1.5						te	I4/m	5.58318		7.8927				61.5076	0.999606		rs	0.62
Sr2CrTaO6	Sr	Cr	Ta	O	s	d	d	1.44	0.615	0.64	0.6275	0.025	0.990473	1.00442	2	3	5	2	Sr2	Cr3	Ta5	0	3	0	11.0303	30.959	48.272	0.95	1.66	1.5	ss	air	1500			te	I4/m	5.58318		7.8927				61.5076	0.999606	169.533	rs	0.62
Sr2CrUO6	Sr	Cr	U	O	s	d	f	1.44	0.615	0.76	0.6875	0.145	0.962004	0.975553	2	3	5	2	Sr2	Cr3	U5	0	3		11.0303	30.959	46	0.95	1.66	1.38	ss	vacuum	1000			c	Fm-3m	8.09						66.1844			rs
Sr2CrWO6	Sr	Cr	W	O	s	d	d	1.44	0.615	0.62	0.6175	0.005	0.995382	1.0094	2	3	5	2	Sr2	Cr3	W5	0	3	1	11.0303	30.959	51.6	0.95	1.66	2.36	ss	H2/Ar	1550			c	Fm-3m	7.82						59.7765			rs	0.54
Sr2CrWO6	Sr	Cr	W	O	s	d	d	1.44	0.615	0.62	0.6175	0.005	0.995382	1.0094	2	3	5	2	Sr2	Cr3	W5	0	3	1	11.0303	30.959	51.6	0.95	1.66	2.36	ss	H2/Ar	1550			c	Fm-3m	7.821						59.7994			rs	?
Sr2CrWO6	Sr	Cr	W	O	s	d	d	1.44	0.615	0.62	0.6175	0.005	0.995382	1.0094	2	3	5	2	Sr2	Cr3	W5	0	3	1	11.0303	30.959	51.6	0.95	1.66	2.36	ss	H2/N2	1500			c	Fm-3m										rs	0.612
Sr2CrWO6	Sr	Cr	W	O	s	d	d	1.44	0.615	0.62	0.6175	0.005	0.995382	1.0094	2	3	5	2	Sr2	Cr3	W5	0	3	1	11.0303	30.959	51.6	0.95	1.66	2.36	ss	vacuum	1000			c		7.82						59.7765			rs	0.5	black
Sr2CrWO6	Sr	Cr	W	O	s	d	d	1.44	0.615	0.62	0.6175	0.005	0.995382	1.0094	2	3	5	2	Sr2	Cr3	W5	0	3	1	11.0303	30.959	51.6	0.95	1.66	2.36	ss	H2/N2	1580			c		7.832						60.0521			rs
Sr2CrWO6	Sr	Cr	W	O	s	d	d	1.44	0.615	0.62	0.6175	0.005	0.995382	1.0094	2	3	5	2	Sr2	Cr3	W5	0	3	1	11.0303	30.959	51.6	0.95	1.66	2.36	ss	H2/N2	1600			c		7.832						60.0521			rs
Sr2CrWO6	Sr	Cr	W	O	s	d	d	1.44	0.615	0.62	0.6175	0.005	0.995382	1.0094	2	3	5	2	Sr2	Cr3	W5	0	3	1	11.0303	30.959	51.6	0.95	1.66	2.36	ss	H2/N2	1300			c		7.832						60.0521			rs
Sr2CrWO6	Sr	Cr	W	O	s	d	d	1.44	0.615	0.62	0.6175	0.005	0.995382	1.0094	2	3	5	2	Sr2	Cr3	W5	0	3	1	11.0303	30.959	51.6	0.95	1.66	2.36
Sr2CuMoO6	Sr	Cu	Mo	O	s	d	d	1.44	0.73	0.59	0.66	0.14	0.974846	0.988576	2	2	6	4	Sr2	Cu2	Mo6	0	9	0	11.0303	20.2924	68.827	0.95	1.9	2.16	HP		900			te	I4/m	5.42583		8.37245				61.6205	1.09112	167.333	rs	1	dark red
Sr2CuOsO6	Sr	Cu	Os	O	s	d	d	1.44	0.73	0.545	0.6375	0.185	0.985611	0.999493	2	2	6	4	Sr2	Cu2	Os6	0	9	2	11.0303	20.2924	70.1	0.95	1.9	2.2	ss	vacuum/Ar	825			te	I4/m	5.38985		8.48635				61.6331	1.11334	165.4	rs	1
Sr2CuTeO6	Sr	Cu	Te	O	s	d	p	1.44	0.73	0.56	0.645	0.17	0.981997	0.995828	2	2	6	4	Sr2	Cu2	Te6	0	9	10	11.0303	20.2924	69.1	0.95	1.9	2.1						te	I4/m	5.418		8.449				62.0045	1.10268		rs
Sr2CuTeO6	Sr	Cu	Te	O	s	d	p	1.44	0.73	0.56	0.645	0.17	0.981997	0.995828	2	2	6	4	Sr2	Cu2	Te6	0	9	10	11.0303	20.2924	69.1	0.95	1.9	2.1	ss	air	1100			te	I4/m	5.4308		8.4664				62.4261	1.10235	166	rs	1
Sr2CuWO6	Sr	Cu	W	O	s	d	d	1.44	0.73	0.6	0.665	0.13	0.972486	0.986183	2	2	6	4	Sr2	Cu2	W6	0	9	0	11.0303	20.2924	64.77	0.95	1.9	2.36	ss	air	1200			te	I4/m	5.42693		8.4087				61.9124	1.09562		rs		green-yellow
Sr2CuWO6	Sr	Cu	W	O	s	d	d	1.44	0.73	0.6	0.665	0.13	0.972486	0.986183	2	2	6	4	Sr2	Cu2	W6	0	9	0	11.0303	20.2924	64.77	0.95	1.9	2.36	ss	air	1000			te	I4/m	5.42998		8.41459				62.0254	1.09577	167.333	rs	1	yellow
Sr2CuWO6	Sr	Cu	W	O	s	d	d	1.44	0.73	0.6	0.665	0.13	0.972486	0.986183	2	2	6	4	Sr2	Cu2	W6	0	9	0	11.0303	20.2924	64.77	0.95	1.9	2.36	ss	air	1100			te	I4/m	5.4169		8.3976				61.6023	1.0962		rs	1
Sr2CuWO6	Sr	Cu	W	O	s	d	d	1.44	0.73	0.6	0.665	0.13	0.972486	0.986183	2	2	6	4	Sr2	Cu2	W6	0	9	0	11.0303	20.2924	64.77	0.95	1.9	2.36	ss	air/O2	1300			te		7.66		8.4				61.6094	1.09661		rs
Sr2CuWO6	Sr	Cu	W	O	s	d	d	1.44	0.73	0.6	0.665	0.13	0.972486	0.986183	2	2	6	4	Sr2	Cu2	W6	0	9	0	11.0303	20.2924	64.77	0.95	1.9	2.36						te	I4/m	5.422		8.395				61.6992	1.09483		rs
Sr2CuWO6	Sr	Cu	W	O	s	d	d	1.44	0.73	0.6	0.665	0.13	0.972486	0.986183	2	2	6	4	Sr2	Cu2	W6	0	9	0	11.0303	20.2924	64.77	0.95	1.9	2.36	ss	air	1000			te	I4/m	5.429		8.4155				62.0097	1.09609	168.667	rs	1
Sr2CuWO6	Sr	Cu	W	O	s	d	d	1.44	0.73	0.6	0.665	0.13	0.972486	0.986183	2	2	6	4	Sr2	Cu2	W6	0	9	0	11.0303	20.2924	64.77	0.95	1.9	2.36	ss	air	1100			te	I4/m	5.4291		8.4154				62.0112	1.09605	165.467	rs	1
Sr2CuWO6	Sr	Cu	W	O	s	d	d	1.44	0.73	0.6	0.665	0.13	0.972486	0.986183	2	2	6	4	Sr2	Cu2	W6	0	9	0	11.0303	20.2924	64.77	0.95	1.9	2.36																	rs?
Sr2DyBiO6	Sr	Dy	Bi	O	s	f	p	1.44	0.912	0.76	0.836	0.152	0.898114	0.910764	2	3	5	2	Sr2	Dy3	Bi5	0		10	11.0303	22.93	54.856	0.95	1.22	2.02	ss	O2	800			m		4.203	4.201	4.203		90.95		74.2013
Sr2DyBiO6	Sr	Dy	Bi	O	s	f	p	1.44	0.912	0.76	0.836	0.152	0.898114	0.910764	2	3	5	2	Sr2	Dy3	Bi5	0		10	11.0303	22.93	54.856	0.95	1.22	2.02	ss	air	950			m	P21/n	5.9	5.996	8.406		90.09		74.3434			rs
Sr2DyIrO6	Sr	Dy	Ir	O	s	f	d	1.44	0.912	0.57	0.741	0.342	0.937965	0.951176	2	3	5	2	Sr2	Dy3	Ir5	0		4	11.0303	22.93	57	0.95	1.22	2.2	ss	air	1200			m	P21/n	5.79	5.811	8.201		90.26		68.9814			rs?
Sr2DyNbO6	Sr	Dy	Nb	O	s	f	d	1.44	0.912	0.64	0.776	0.272	0.922878	0.935877	2	3	5	2	Sr2	Dy3	Nb5	0		0	11.0303	22.93	50.5728	0.95	1.22	1.6	ss	air	1400			m		5.81	5.87	8.26		90.15		70.426			rs
Sr2DyReO6	Sr	Dy	Re	O	s	f	d	1.44	0.912	0.58	0.746	0.332	0.93578	0.94896	2	3	5	2	Sr2	Dy3	Re5	0		2	11.0303	22.93	51.9	0.95	1.22	1.9	ss	ampoule	1000			c	Fm-3m	8.21						69.1735			rs
Sr2DyReO6	Sr	Dy	Re	O	s	f	d	1.44	0.912	0.58	0.746	0.332	0.93578	0.94896	2	3	5	2	Sr2	Dy3	Re5	0		2	11.0303	22.93	51.9	0.95	1.22	1.9	ss	vacuum	1000			c	Fm-3m	8.21						69.1735			rs
Sr2DyRuO6	Sr	Dy	Ru	O	s	f	d	1.44	0.912	0.565	0.7385	0.347	0.939062	0.952288	2	3	5	2	Sr2	Dy3	Ru5	0		3	11.0303	22.93	59	0.95	1.22	2.2	ss	air	1200			m	P21/n	5.7777	5.7974	8.1821		90.27		68.5154		158	rs?
Sr2DyRuO6	Sr	Dy	Ru	O	s	f	d	1.44	0.912	0.565	0.7385	0.347	0.939062	0.952288	2	3	5	2	Sr2	Dy3	Ru5	0		3	11.0303	22.93	59	0.95	1.22	2.2	ss	air	1300			m	P21/n	?	?	?		?					rs
Sr2DySbO6	Sr	Dy	Sb	O	s	f	p	1.44	0.912	0.6	0.756	0.312	0.931439	0.944558	2	3	5	2	Sr2	Dy3	Sb5	0		10	11.0303	22.93	55	0.95	1.22	2.05			1400			~c		4.11						69.4265
Sr2DySbO6	Sr	Dy	Sb	O	s	f	p	1.44	0.912	0.6	0.756	0.312	0.931439	0.944558	2	3	5	2	Sr2	Dy3	Sb5	0		10	11.0303	22.93	55	0.95	1.22	2.05	ss	air				m		5.82	5.85	8.25		90.19		70.2216					white
Sr2DySbO6	Sr	Dy	Sb	O	s	f	p	1.44	0.912	0.6	0.756	0.312	0.931439	0.944558	2	3	5	2	Sr2	Dy3	Sb5	0		10	11.0303	22.93	55	0.95	1.22	2.05	ss	air	1400			m	P21/n	5.8224	5.8538	8.2507		90.186		70.3021		155.833	rs
Sr2DyTaO6	Sr	Dy	Ta	O	s	f	d	1.44	0.912	0.64	0.776	0.272	0.922878	0.935877	2	3	5	2	Sr2	Dy3	Ta5	0		0	11.0303	22.93	48.272	0.95	1.22	1.5	ss	air	1400			m		5.82	5.87	8.26		90.13		70.5472			rs
Sr2DyTaO6	Sr	Dy	Ta	O	s	f	d	1.44	0.912	0.64	0.776	0.272	0.922878	0.935877	2	3	5	2	Sr2	Dy3	Ta5	0		0	11.0303	22.93	48.272	0.95	1.22	1.5	ss	air	1300			m	P21/n	5.8209	5.8793	8.2624		90.167		70.6904			rs?
Sr2DyTaO6	Sr	Dy	Ta	O	s	f	d	1.44	0.912	0.64	0.776	0.272	0.922878	0.935877	2	3	5	2	Sr2	Dy3	Ta5	0		0	11.0303	22.93	48.272	0.95	1.22	1.5	ss	air	1500			m	P21/n	?	?	?		?					rs
Sr2DyUO6	Sr	Dy	U	O	s	f	f	1.44	0.912	0.76	0.836	0.152	0.898114	0.910764	2	3	5	2	Sr2	Dy3	U5	0			11.0303	22.93	46	0.95	1.22	1.38			1300			~c?		8.58						78.9536			rs
Sr2ErBiO6	Sr	Er	Bi	O	s	f	p	1.44	0.89	0.76	0.825	0.13	0.902554	0.915266	2	3	5	2	Sr2	Er3	Bi5	0		10	11.0303	22.74	54.856	0.95	1.24	2.02	ss	air	950			m	P21/n	5.878	5.958	8.364		90.09		73.2291			rs
Sr2ErBiO6	Sr	Er	Bi	O	s	f	p	1.44	0.89	0.76	0.825	0.13	0.902554	0.915266	2	3	5	2	Sr2	Er3	Bi5	0		10	11.0303	22.74	54.856	0.95	1.24	2.02	ss	O2	800			m		4.203	4.19	4.203		90.9167		74.0078
Sr2ErIrO6	Sr	Er	Ir	O	s	f	d	1.44	0.89	0.57	0.73	0.32	0.942809	0.956088	2	3	5	2	Sr2	Er3	Ir5	0		4	11.0303	22.74	57	0.95	1.24	2.2	ss	air	1200			m	P21/n	5.777	5.781	8.171		90.17		68.2211			rs?
Sr2ErMoO6	Sr	Er	Mo	O	s	f	d	1.44	0.89	0.61	0.75	0.28	0.934039	0.947194	2	3	5	2	Sr2	Er3	Mo5	0		1	11.0303	22.74	54.4167	0.95	1.24	2.16	ss	H2/N2	1250			m	P21/n	5.78711	5.80692	8.19		90.202		68.8064		156.9	rs	1
Sr2ErNbO6	Sr	Er	Nb	O	s	f	d	1.44	0.89	0.64	0.765	0.25	0.927567	0.940632	2	3	5	2	Sr2	Er3	Nb5	0		0	11.0303	22.74	50.5728	0.95	1.24	1.6	ss	air	1400			m		5.8	5.84	8.23		90.0667		69.6916			rs
Sr2ErReO6	Sr	Er	Re	O	s	f	d	1.44	0.89	0.58	0.735	0.31	0.940601	0.953849	2	3	5	2	Sr2	Er3	Re5	0		2	11.0303	22.74	51.9	0.95	1.24	1.9	ss	ampoule	1000			c	Fm-3m	8.181						68.443			rs
Sr2ErReO6	Sr	Er	Re	O	s	f	d	1.44	0.89	0.58	0.735	0.31	0.940601	0.953849	2	3	5	2	Sr2	Er3	Re5	0		2	11.0303	22.74	51.9	0.95	1.24	1.9	ss	vacuum	1000			c	Fm-3m	8.181						68.443			rs
Sr2ErRuO6	Sr	Er	Ru	O	s	f	d	1.44	0.89	0.565	0.7275	0.325	0.943917	0.957212	2	3	5	2	Sr2	Er3	Ru5	0		3	11.0303	22.74	59	0.95	1.24	2.2	ss	air	1240			m	P21/n	5.766	5.7722	8.1544		90.2099		67.8493		158.663	rs	1
Sr2ErRuO6	Sr	Er	Ru	O	s	f	d	1.44	0.89	0.565	0.7275	0.325	0.943917	0.957212	2	3	5	2	Sr2	Er3	Ru5	0		3	11.0303	22.74	59	0.95	1.24	2.2	ss	air	1200			m	P21/n	5.7611	5.7644	8.1449		90.18		67.6212		159	rs?
Sr2ErRuO6	Sr	Er	Ru	O	s	f	d	1.44	0.89	0.565	0.7275	0.325	0.943917	0.957212	2	3	5	2	Sr2	Er3	Ru5	0		3	11.0303	22.74	59	0.95	1.24	2.2	ss	air	1300			m	P21/n	5.7626	5.7681	8.1489		90.19		67.7155			rs	1
Sr2ErRuO6	Sr	Er	Ru	O	s	f	d	1.44	0.89	0.565	0.7275	0.325	0.943917	0.957212	2	3	5	2	Sr2	Er3	Ru5	0		3	11.0303	22.74	59	0.95	1.24	2.2	ss	air	1300			m	P21/n	?	?	?		?					rs
Sr2ErRuO6	Sr	Er	Ru	O	s	f	d	1.44	0.89	0.565	0.7275	0.325	0.943917	0.957212	2	3	5	2	Sr2	Er3	Ru5	0		3	11.0303	22.74	59	0.95	1.24	2.2	ss	air	1200
Sr2ErSbO6	Sr	Er	Sb	O	s	f	p	1.44	0.89	0.6	0.745	0.29	0.936216	0.949402	2	3	5	2	Sr2	Er3	Sb5	0		10	11.0303	22.74	55	0.95	1.24	2.05			1400			~c		4.11						69.4265
Sr2ErTaO6	Sr	Er	Ta	O	s	f	d	1.44	0.89	0.64	0.765	0.25	0.927567	0.940632	2	3	5	2	Sr2	Er3	Ta5	0		0	11.0303	22.74	48.272	0.95	1.24	1.5	ss	air	1400			m		5.8	5.84	8.23		90.07		69.6916			rs
Sr2ErTaO6	Sr	Er	Ta	O	s	f	d	1.44	0.89	0.64	0.765	0.25	0.927567	0.940632	2	3	5	2	Sr2	Er3	Ta5	0		0	11.0303	22.74	48.272	0.95	1.24	1.5	ss	air	1300			m	P21/n	5.8054	5.8528	8.2346		90.142		69.9483			rs?
Sr2ErTaO6	Sr	Er	Ta	O	s	f	d	1.44	0.89	0.64	0.765	0.25	0.927567	0.940632	2	3	5	2	Sr2	Er3	Ta5	0		0	11.0303	22.74	48.272	0.95	1.24	1.5	ss	air	1500			m	P21/n	?	?	?		?					rs
Sr2ErUO6	Sr	Er	U	O	s	f	f	1.44	0.89	0.76	0.825	0.13	0.902554	0.915266	2	3	5	2	Sr2	Er3	U5	0			11.0303	22.74	46	0.95	1.24	1.38			1300			~c?		8.55						78.1283			rs
Sr2EuBiO6	Sr	Eu	Bi	O	s	f	p	1.44	0.947	0.76	0.8535	0.187	0.89114	0.903691	2	3	5	2	Sr2	Eu3	Bi5	0		10	11.0303	24.92	54.856	0.95	0	2.02	ss	air	950			m	P21/n	5.913	6.04	8.448		90.1		75.429			rs
Sr2EuIrO6	Sr	Eu	Ir	O	s	f	d	1.44	0.947	0.57	0.7585	0.377	0.930361	0.943464	2	3	5	2	Sr2	Eu3	Ir5	0		4	11.0303	24.92	57	0.95	0	2.2	ss	air	1200			m	P21/n	5.821	5.858	8.252		90.32		70.346			rs?
Sr2EuNbO6	Sr	Eu	Nb	O	s	f	d	1.44	0.947	0.64	0.7935	0.307	0.915516	0.92841	2	3	5	2	Sr2	Eu3	Nb5	0		0	11.0303	24.92	50.5728	0.95	0	1.6	ss	air	1400			m		5.84	5.91	8.3		90.2		71.6169			rs
Sr2EuRuO6	Sr	Eu	Ru	O	s	f	d	1.44	0.947	0.565	0.756	0.382	0.931439	0.944558	2	3	5	2	Sr2	Eu3	Ru5	0		3	11.0303	24.92	59	0.95	0	2.2			1150			te		8.247		8.171				69.4668	0.990785		rs	0.84
Sr2EuRuO6	Sr	Eu	Ru	O	s	f	d	1.44	0.947	0.565	0.756	0.382	0.931439	0.944558	2	3	5	2	Sr2	Eu3	Ru5	0		3	11.0303	24.92	59	0.95	0	2.2	ss	air	1200			m	P21/n	5.8055	5.8455	8.2302		90.36		69.8237		155	rs?
Sr2EuRuO6	Sr	Eu	Ru	O	s	f	d	1.44	0.947	0.565	0.756	0.382	0.931439	0.944558	2	3	5	2	Sr2	Eu3	Ru5	0		3	11.0303	24.92	59	0.95	0	2.2	ss	air	1300			m	P21/n	?	?	?		?					rs
Sr2EuSbO6	Sr	Eu	Sb	O	s	f	p	1.44	0.947	0.6	0.7735	0.347	0.92394	0.936953	2	3	5	2	Sr2	Eu3	Sb5	0		10	11.0303	24.92	55	0.95	0	2.05	ss	air				m		5.84	5.9	8.3		90.25		71.4955					white
Sr2EuTaO6	Sr	Eu	Ta	O	s	f	d	1.44	0.947	0.64	0.7935	0.307	0.915516	0.92841	2	3	5	2	Sr2	Eu3	Ta5	0		0	11.0303	24.92	48.272	0.95	0	1.5	ss	air	1400			m		5.84	5.91	8.3		90.2		71.6169			rs
Sr2EuTaO6	Sr	Eu	Ta	O	s	f	d	1.44	0.947	0.64	0.7935	0.307	0.915516	0.92841	2	3	5	2	Sr2	Eu3	Ta5	0		0	11.0303	24.92	48.272	0.95	0	1.5	ss	air	1300			m	P21/n	5.845	5.9284	8.3106		90.206		71.9932			rs?
Sr2EuTaO6	Sr	Eu	Ta	O	s	f	d	1.44	0.947	0.64	0.7935	0.307	0.915516	0.92841	2	3	5	2	Sr2	Eu3	Ta5	0		0	11.0303	24.92	48.272	0.95	0	1.5	ss	air	1500			m	P21/n	?	?	?		?					rs
Sr2EuUO6	Sr	Eu	U	O	s	f	f	1.44	0.947	0.76	0.8535	0.187	0.89114	0.903691	2	3	5	2	Sr2	Eu3	U5	0			11.0303	24.92	46	0.95	0	1.38			1300			~c?		8.57						78.6778			rs
Sr2FeBiO6	Sr	Fe	Bi	O	s	d	p	1.44	0.645	0.76	0.7025	0.115	0.955141	0.968593	2	3	5	2	Sr2	Fe3	Bi5	0	5	10	11.0303	30.651	54.856	0.95	1.83	2.02	HP					c		8.063						65.5239			rs
Sr2FeBiO6	Sr	Fe	Bi	O	s	d	p	1.44	0.645	0.76	0.7025	0.115	0.955141	0.968593	2	3	5	2	Sr2	Fe3	Bi5	0	5	10	11.0303	30.651	54.856	0.95	1.83	2.02	HP	O2	1000			c	Fm-3m	8.063						65.5239			rs
Sr2FeCoO6	Sr	Fe	Co	O	s	d	d	1.44	0.585	0.53	0.5575	0.055	1.02589	1.04034	2	4	4	0	Sr2	Fe4	Co4	0	4	5	11.0303	54.91	51.27	0.95	1.83	1.88	ss	air/O2	1400			c		3.842						56.7116			d?
Sr2FeCoO6	Sr	Fe	Co	O	s	d	d	1.44	0.585	0.53	0.5575	0.055	1.02589	1.04034	2	4	4	0	Sr2	Fe4	Co4	0	4	5	11.0303	54.91	51.27	0.95	1.83	1.88	HP		1000			c	Pm-3m	3.83778						56.525			d	0
Sr2FeCoO6	Sr	Fe	Co	O	s	d	d	1.44	0.585	0.53	0.5575	0.055	1.02589	1.04034	2	4	4	0	Sr2	Fe4	Co4	0	4	5	11.0303	54.91	51.27	0.95	1.83	1.88	sol-gel					te	I4/m	5.4554		7.7319				57.528	1.00218	177.92	d	0
Sr2FeCoO6	Sr	Fe	Co	O	s	d	d	1.44	0.585	0.53	0.5575	0.055	1.02589	1.04034	2	4	4	0	Sr2	Fe4	Co4	0	4	5	11.0303	54.91	51.27	0.95	1.83	1.88	HP		600			c		3.83						56.1819			d?
Sr2FeCoO6	Sr	Fe	Co	O	s	d	d	1.44	0.585	0.53	0.5575	0.055	1.02589	1.04034	2	4	4	0	Sr2	Fe4	Co4	0	4	5	11.0303	54.91	51.27	0.95	1.83	1.88	nitrate	air + oxidation	1200			c		3.837						56.4905			d	0
Sr2FeCoO6	Sr	Fe	Co	O	s	d	d	1.44	0.585	0.53	0.5575	0.055	1.02589	1.04034	2	4	4	0	Sr2	Fe4	Co4	0	4	5	11.0303	54.91	51.27	0.95	1.83	1.88	sol-gel	air	1050			te	I4/m	5.4609		7.7113				57.4905	0.998501		d	0
Sr2FeIrO6	Sr	Fe	Ir	O	s	d	d	1.44	0.645	0.57	0.6075	0.075	1.00034	1.01443	2	3	5	2	Sr2	Fe3	Ir5	0	5	4	11.0303	30.651	57	0.95	1.83	2.2	ss	air	1150			tr	I-1	5.54996	5.57847	7.84165	89.99	90.059	90.079	60.6947		169.333	rs	0.856
Sr2FeMoO6	Sr	Fe	Mo	O	s	d	d	1.44	0.645	0.61	0.6275	0.035	0.990473	1.00442	2	3	5	2	Sr2	Fe3	Mo5	0	5	1	11.0303	30.651	54.4167	0.95	1.83	2.16																	rs
Sr2FeMoO6	Sr	Fe	Mo	O	s	d	d	1.44	0.645	0.61	0.6275	0.035	0.990473	1.00442	2	3	5	2	Sr2	Fe3	Mo5	0	5	1	11.0303	30.651	54.4167	0.95	1.83	2.16	floating-zone	Ar				te	I4/mmm	5.5447		7.8393				60.2523
Sr2FeMoO6	Sr	Fe	Mo	O	s	d	d	1.44	0.645	0.61	0.6275	0.035	0.990473	1.00442	2	3	5	2	Sr2	Fe3	Mo5	0	5	1	11.0303	30.651	54.4167	0.95	1.83	2.16	ss	vacuum	1100			te		7.87		7.895				61.124	1.00318		rs?
Sr2FeMoO6	Sr	Fe	Mo	O	s	d	d	1.44	0.645	0.61	0.6275	0.035	0.990473	1.00442	2	3	5	2	Sr2	Fe3	Mo5	0	5	1	11.0303	30.651	54.4167	0.95	1.83	2.16	ss	H2/N2	1000			te	I4/m	5.5686		7.8985				61.2318	1.00296		rs	0.714
Sr2FeMoO6	Sr	Fe	Mo	O	s	d	d	1.44	0.645	0.61	0.6275	0.035	0.990473	1.00442	2	3	5	2	Sr2	Fe3	Mo5	0	5	1	11.0303	30.651	54.4167	0.95	1.83	2.16	ss	N2	1250					5.56847		7.9				61.2404			rs?
Sr2FeMoO6	Sr	Fe	Mo	O	s	d	d	1.44	0.645	0.61	0.6275	0.035	0.990473	1.00442	2	3	5	2	Sr2	Fe3	Mo5	0	5	1	11.0303	30.651	54.4167	0.95	1.83	2.16	ss	H2/Ar	1300			te	I4/m	5.56968		7.89862				61.2564	1.00278		rs		dark blue
Sr2FeMoO6	Sr	Fe	Mo	O	s	d	d	1.44	0.645	0.61	0.6275	0.035	0.990473	1.00442	2	3	5	2	Sr2	Fe3	Mo5	0	5	1	11.0303	30.651	54.4167	0.95	1.83	2.16	fz	Ar				te	I4/mmm	5.577		7.887				61.3272	0.999991		rs	0.92
Sr2FeMoO6	Sr	Fe	Mo	O	s	d	d	1.44	0.645	0.61	0.6275	0.035	0.990473	1.00442	2	3	5	2	Sr2	Fe3	Mo5	0	5	1	11.0303	30.651	54.4167	0.95	1.83	2.16	ss	vacuum	1200			c	Fm-3m	7.8882						61.3541			rs
Sr2FeMoO6	Sr	Fe	Mo	O	s	d	d	1.44	0.645	0.61	0.6275	0.035	0.990473	1.00442	2	3	5	2	Sr2	Fe3	Mo5	0	5	1	11.0303	30.651	54.4167	0.95	1.83	2.16	ss	H2/Ar	1100			te	P4/mmm	5.573		7.905				61.379	1.00299		rs
Sr2FeMoO6	Sr	Fe	Mo	O	s	d	d	1.44	0.645	0.61	0.6275	0.035	0.990473	1.00442	2	3	5	2	Sr2	Fe3	Mo5	0	5	1	11.0303	30.651	54.4167	0.95	1.83	2.16	ss	H2/Ar	1225			te	I4/mmm	5.576		7.904				61.4373	1.00233		rs
Sr2FeMoO6	Sr	Fe	Mo	O	s	d	d	1.44	0.645	0.61	0.6275	0.035	0.990473	1.00442	2	3	5	2	Sr2	Fe3	Mo5	0	5	1	11.0303	30.651	54.4167	0.95	1.83	2.16	ss	H2/Ar	1225			te	I4/mmm	5.576		7.904				61.4373	1.00233		rs		blue-black
Sr2FeMoO6	Sr	Fe	Mo	O	s	d	d	1.44	0.645	0.61	0.6275	0.035	0.990473	1.00442	2	3	5	2	Sr2	Fe3	Mo5	0	5	1	11.0303	30.651	54.4167	0.95	1.83	2.16	ss	vacuum	1150			te	I4/m	5.577		7.9053				61.4695	1.00231		rs
Sr2FeMoO6	Sr	Fe	Mo	O	s	d	d	1.44	0.645	0.61	0.6275	0.035	0.990473	1.00442	2	3	5	2	Sr2	Fe3	Mo5	0	5	1	11.0303	30.651	54.4167	0.95	1.83	2.16	ss	H2/Ar	1400														rs	0.91
Sr2FeMoO6	Sr	Fe	Mo	O	s	d	d	1.44	0.645	0.61	0.6275	0.035	0.990473	1.00442	2	3	5	2	Sr2	Fe3	Mo5	0	5	1	11.0303	30.651	54.4167	0.95	1.83	2.16	ss	H2/Ar	1280			te	I4/mmm										rs
Sr2FeMoO6	Sr	Fe	Mo	O	s	d	d	1.44	0.645	0.61	0.6275	0.035	0.990473	1.00442	2	3	5	2	Sr2	Fe3	Mo5	0	5	1	11.0303	30.651	54.4167	0.95	1.83	2.16	floating-zone	Ar				te	I4/mmm										rs	0.9
Sr2FeMoO6	Sr	Fe	Mo	O	s	d	d	1.44	0.645	0.61	0.6275	0.035	0.990473	1.00442	2	3	5	2	Sr2	Fe3	Mo5	0	5	1	11.0303	30.651	54.4167	0.95	1.83	2.16	fz																rs	0.85
Sr2FeMoO6	Sr	Fe	Mo	O	s	d	d	1.44	0.645	0.61	0.6275	0.035	0.990473	1.00442	2	3	5	2	Sr2	Fe3	Mo5	0	5	1	11.0303	30.651	54.4167	0.95	1.83	2.16	ss	H2/Ar	1300			te	I4/m	5.57128		7.89461				61.2605	1.00198		rs		dark blue
Sr2FeMoO6	Sr	Fe	Mo	O	s	d	d	1.44	0.645	0.61	0.6275	0.035	0.990473	1.00442	2	3	5	2	Sr2	Fe3	Mo5	0	5	1	11.0303	30.651	54.4167	0.95	1.83	2.16	ss	H2/Ar	1200			te	I4/m	5.5741		7.90286				61.3866	1.00252	174.533	rs	0.9
Sr2FeMoO6	Sr	Fe	Mo	O	s	d	d	1.44	0.645	0.61	0.6275	0.035	0.990473	1.00442	2	3	5	2	Sr2	Fe3	Mo5	0	5	1	11.0303	30.651	54.4167	0.95	1.83	2.16	ss	H2/Ar	1300			te	I4/m	5.57116		7.89997				61.2995	1.00269		rs		dark blue
Sr2FeMoO6	Sr	Fe	Mo	O	s	d	d	1.44	0.645	0.61	0.6275	0.035	0.990473	1.00442	2	3	5	2	Sr2	Fe3	Mo5	0	5	1	11.0303	30.651	54.4167	0.95	1.83	2.16	ss	H2/N2	1000			te	I4/m	5.5686		7.8985				61.2318	1.00296	180	rs	0.85
Sr2FeMoO6	Sr	Fe	Mo	O	s	d	d	1.44	0.645	0.61	0.6275	0.035	0.990473	1.00442	2	3	5	2	Sr2	Fe3	Mo5	0	5	1	11.0303	30.651	54.4167	0.95	1.83	2.16						te	I4/m	5.56846		7.9004				61.2434	1.00323	174.133	rs	0.9
Sr2FeMoO6	Sr	Fe	Mo	O	s	d	d	1.44	0.645	0.61	0.6275	0.035	0.990473	1.00442	2	3	5	2	Sr2	Fe3	Mo5	0	5	1	11.0303	30.651	54.4167	0.95	1.83	2.16	sol-gel	H2/Ar	1200			te	I4/m	5.5686		7.9007				61.2488	1.00324		rs	0.94	black
Sr2FeMoO6	Sr	Fe	Mo	O	s	d	d	1.44	0.645	0.61	0.6275	0.035	0.990473	1.00442	2	3	5	2	Sr2	Fe3	Mo5	0	5	1	11.0303	30.651	54.4167	0.95	1.83	2.16	sol-gel	H2/Ar				te	I4/m	5.56863		7.9007				61.2495	1.00323		rs	0.94	black
Sr2FeMoO6	Sr	Fe	Mo	O	s	d	d	1.44	0.645	0.61	0.6275	0.035	0.990473	1.00442	2	3	5	2	Sr2	Fe3	Mo5	0	5	1	11.0303	30.651	54.4167	0.95	1.83	2.16	ss	H2/CO2	1200			te	I4/mmm	5.5693		7.9006				61.2634	1.0031		rs
Sr2FeMoO6	Sr	Fe	Mo	O	s	d	d	1.44	0.645	0.61	0.6275	0.035	0.990473	1.00442	2	3	5	2	Sr2	Fe3	Mo5	0	5	1	11.0303	30.651	54.4167	0.95	1.83	2.16	ss	H2/Ar	1000			te	I4/m	5.578		7.8846				61.3305	0.999508	173.147	rs	0.4
Sr2FeMoO6	Sr	Fe	Mo	O	s	d	d	1.44	0.645	0.61	0.6275	0.035	0.990473	1.00442	2	3	5	2	Sr2	Fe3	Mo5	0	5	1	11.0303	30.651	54.4167	0.95	1.83	2.16	ss	H2/Ar	1200			te	P42/m	5.5724		7.9006				61.3317	1.00254	173.667	rs	1
Sr2FeMoO6	Sr	Fe	Mo	O	s	d	d	1.44	0.645	0.61	0.6275	0.035	0.990473	1.00442	2	3	5	2	Sr2	Fe3	Mo5	0	5	1	11.0303	30.651	54.4167	0.95	1.83	2.16	ss	vacuum	1000			c		7.89						61.3961			rs		black
Sr2FeMoO6	Sr	Fe	Mo	O	s	d	d	1.44	0.645	0.61	0.6275	0.035	0.990473	1.00442	2	3	5	2	Sr2	Fe3	Mo5	0	5	1	11.0303	30.651	54.4167	0.95	1.83	2.16	sol-gel	H2/Ar	1000			tr	I-1	5.57694	5.57721	7.90522	89.96	90.051	90.0211	61.4705			rs	0.384
Sr2FeMoO6	Sr	Fe	Mo	O	s	d	d	1.44	0.645	0.61	0.6275	0.035	0.990473	1.00442	2	3	5	2	Sr2	Fe3	Mo5	0	5	1	11.0303	30.651	54.4167	0.95	1.83	2.16	sol-gel	H2/Ar	1100			te	I4/m										rs	0.9	black
Sr2FeMoO6	Sr	Fe	Mo	O	s	d	d	1.44	0.645	0.61	0.6275	0.035	0.990473	1.00442	2	3	5	2	Sr2	Fe3	Mo5	0	5	1	11.0303	30.651	54.4167	0.95	1.83	2.16																	rs?
Sr2FeMoO6	Sr	Fe	Mo	O	s	d	d	1.44	0.645	0.61	0.6275	0.035	0.990473	1.00442	2	3	5	2	Sr2	Fe3	Mo5	0	5	1	11.0303	30.651	54.4167	0.95	1.83	2.16	sol-gel	vacuum	1150														rs	0.95
Sr2FeMoO6	Sr	Fe	Mo	O	s	d	d	1.44	0.645	0.61	0.6275	0.035	0.990473	1.00442	2	3	5	2	Sr2	Fe3	Mo5	0	5	1	11.0303	30.651	54.4167	0.95	1.83	2.16																	rs?
Sr2FeMoO6	Sr	Fe	Mo	O	s	d	d	1.44	0.645	0.61	0.6275	0.035	0.990473	1.00442	2	3	5	2	Sr2	Fe3	Mo5	0	5	1	11.0303	30.651	54.4167	0.95	1.83	2.16	ss	vacuum	1150														rs	0.906
Sr2FeMoO6	Sr	Fe	Mo	O	s	d	d	1.44	0.645	0.61	0.6275	0.035	0.990473	1.00442	2	3	5	2	Sr2	Fe3	Mo5	0	5	1	11.0303	30.651	54.4167	0.95	1.83	2.16	sol-gel	H2/N2	850			te	I4/m										rs	0.18
Sr2FeMoO6	Sr	Fe	Mo	O	s	d	d	1.44	0.645	0.61	0.6275	0.035	0.990473	1.00442	2	3	5	2	Sr2	Fe3	Mo5	0	5	1	11.0303	30.651	54.4167	0.95	1.83	2.16	sol-gel	H2/N2	1050			te	I4/m										rs	0.68
Sr2FeNbO6	Sr	Fe	Nb	O	s	d	d	1.44	0.645	0.64	0.6425	0.005	0.983199	0.997047	2	3	5	2	Sr2	Fe3	Nb5	0	5	0	11.0303	30.651	50.5728	0.95	1.83	1.6	ss	air	1400			te	I4/m	5.6078		7.9658				62.626	1.00444		rs	0.36
Sr2FeNbO6	Sr	Fe	Nb	O	s	d	d	1.44	0.645	0.64	0.6425	0.005	0.983199	0.997047	2	3	5	2	Sr2	Fe3	Nb5	0	5	0	11.0303	30.651	50.5728	0.95	1.83	1.6	ss	air	1300			o		5.6115	5.6061	7.947				62.5004			d	0
Sr2FeNbO6	Sr	Fe	Nb	O	s	d	d	1.44	0.645	0.64	0.6425	0.005	0.983199	0.997047	2	3	5	2	Sr2	Fe3	Nb5	0	5	0	11.0303	30.651	50.5728	0.95	1.83	1.6	ss	air				te	I4/mcm	5.60328		7.965				62.5188	1.00514		d	0
Sr2FeNbO6	Sr	Fe	Nb	O	s	d	d	1.44	0.645	0.64	0.6425	0.005	0.983199	0.997047	2	3	5	2	Sr2	Fe3	Nb5	0	5	0	11.0303	30.651	50.5728	0.95	1.83	1.6	ss	air	1300			o	Pnma	5.6082	7.9642	5.6084				62.6246			d	0
Sr2FeNbO6	Sr	Fe	Nb	O	s	d	d	1.44	0.645	0.64	0.6425	0.005	0.983199	0.997047	2	3	5	2	Sr2	Fe3	Nb5	0	5	0	11.0303	30.651	50.5728	0.95	1.83	1.6	ss	air	1300			c		3.987						63.378			d	0
Sr2FeOsO6	Sr	Fe	Os	O	s	d	d	1.44	0.645	0.575	0.61	0.07	0.999096	1.01317	2	3	5	2	Sr2	Fe3	Os5	0	5	3	11.0303	30.651	55	0.95	1.83	2.2	ss	Ar	1000			te	I4/m	5.5485		7.8867				60.6997	1.00509	170.2	rs	0.88
Sr2FeOsO6	Sr	Fe	Os	O	s	d	d	1.44	0.645	0.575	0.61	0.07	0.999096	1.01317	2	3	5	2	Sr2	Fe3	Os5	0	5	3	11.0303	30.651	55	0.95	1.83	2.2	HP		1500			te	I4/m	5.5528		7.901				60.904	1.00613		rs	0.87
Sr2FeOsO6	Sr	Fe	Os	O	s	d	d	1.44	0.645	0.575	0.61	0.07	0.999096	1.01317	2	3	5	2	Sr2	Fe3	Os5	0	5	3	11.0303	30.651	55	0.95	1.83	2.2						c		7.85						60.4671			rs?
Sr2FeReO6	Sr	Fe	Re	O	s	d	d	1.44	0.645	0.58	0.6125	0.065	0.997855	1.01191	2	3	5	2	Sr2	Fe3	Re5	0	5	2	11.0303	30.651	51.9	0.95	1.83	1.9	ss	vacuum	900			te	I4/mmm	5.558		7.874				60.8097	1.00176		rs
Sr2FeReO6	Sr	Fe	Re	O	s	d	d	1.44	0.645	0.58	0.6125	0.065	0.997855	1.01191	2	3	5	2	Sr2	Fe3	Re5	0	5	2	11.0303	30.651	51.9	0.95	1.83	1.9	ss	vacuum	1100			te	I4/mmm	5.55		7.9				60.8349	1.00651		rs	0.95
Sr2FeReO6	Sr	Fe	Re	O	s	d	d	1.44	0.645	0.58	0.6125	0.065	0.997855	1.01191	2	3	5	2	Sr2	Fe3	Re5	0	5	2	11.0303	30.651	51.9	0.95	1.83	1.9	ss	vacuum	1100			te		7.861		7.904				61.0538	1.00547		rs
Sr2FeReO6	Sr	Fe	Re	O	s	d	d	1.44	0.645	0.58	0.6125	0.065	0.997855	1.01191	2	3	5	2	Sr2	Fe3	Re5	0	5	2	11.0303	30.651	51.9	0.95	1.83	1.9	ss	Ar/vacuum	1400			te	I4/m	5.56129		7.9008				61.0889	1.00457	173.48	rs	1
Sr2FeReO6	Sr	Fe	Re	O	s	d	d	1.44	0.645	0.58	0.6125	0.065	0.997855	1.01191	2	3	5	2	Sr2	Fe3	Re5	0	5	2	11.0303	30.651	51.9	0.95	1.83	1.9	ss	vacuum	1000			te											rs
Sr2FeReO6	Sr	Fe	Re	O	s	d	d	1.44	0.645	0.58	0.6125	0.065	0.997855	1.01191	2	3	5	2	Sr2	Fe3	Re5	0	5	2	11.0303	30.651	51.9	0.95	1.83	1.9	ss	vacuum	1200														rs	0.95
Sr2FeReO6	Sr	Fe	Re	O	s	d	d	1.44	0.645	0.58	0.6125	0.065	0.997855	1.01191	2	3	5	2	Sr2	Fe3	Re5	0	5	2	11.0303	30.651	51.9	0.95	1.83	1.9	ss	Ar	1000			te	I4/m	7.85		7.86				61	1.00127		rs
Sr2FeReO6	Sr	Fe	Re	O	s	d	d	1.44	0.645	0.58	0.6125	0.065	0.997855	1.01191	2	3	5	2	Sr2	Fe3	Re5	0	5	2	11.0303	30.651	51.9	0.95	1.83	1.9	ss	ampoule	1000			te		7.86		7.89				60.9301			rs
Sr2FeReO6	Sr	Fe	Re	O	s	d	d	1.44	0.645	0.58	0.6125	0.065	0.997855	1.01191	2	3	5	2	Sr2	Fe3	Re5	0	5	2	11.0303	30.651	51.9	0.95	1.83	1.9						te		7.86		7.89				60.9301	1.00382		rs?
Sr2FeReO6	Sr	Fe	Re	O	s	d	d	1.44	0.645	0.58	0.6125	0.065	0.997855	1.01191	2	3	5	2	Sr2	Fe3	Re5	0	5	2	11.0303	30.651	51.9	0.95	1.83	1.9	ss	N2	1000			te		7.86		7.89				60.9301	1.00382		rs?
Sr2FeReO6	Sr	Fe	Re	O	s	d	d	1.44	0.645	0.58	0.6125	0.065	0.997855	1.01191	2	3	5	2	Sr2	Fe3	Re5	0	5	2	11.0303	30.651	51.9	0.95	1.83	1.9	sol-gel	N2	1400			te	I4/m	5.5639		7.8845				61.0201	1.00203	174.54	rs	0.502	black
Sr2FeReO6	Sr	Fe	Re	O	s	d	d	1.44	0.645	0.58	0.6125	0.065	0.997855	1.01191	2	3	5	2	Sr2	Fe3	Re5	0	5	2	11.0303	30.651	51.9	0.95	1.83	1.9	sol-gel	N2				te	I4/m	5.5641		7.8851				61.0291	1.00207		rs	0.5	black
Sr2FeReO6	Sr	Fe	Re	O	s	d	d	1.44	0.645	0.58	0.6125	0.065	0.997855	1.01191	2	3	5	2	Sr2	Fe3	Re5	0	5	2	11.0303	30.651	51.9	0.95	1.83	1.9	ss	vacuum	1000			te	P42/m	5.5596		7.8981				61.0309	1.00453		rs	0.85
Sr2FeReO6	Sr	Fe	Re	O	s	d	d	1.44	0.645	0.58	0.6125	0.065	0.997855	1.01191	2	3	5	2	Sr2	Fe3	Re5	0	5	2	11.0303	30.651	51.9	0.95	1.83	1.9						c	Fm-3m	7.8752						61.0513			rs	0.97
Sr2FeReO6	Sr	Fe	Re	O	s	d	d	1.44	0.645	0.58	0.6125	0.065	0.997855	1.01191	2	3	5	2	Sr2	Fe3	Re5	0	5	2	11.0303	30.651	51.9	0.95	1.83	1.9						te	I4/mmm	5.561		7.9				61.0763	1.00452		rs	0.97
Sr2FeReO6	Sr	Fe	Re	O	s	d	d	1.44	0.645	0.58	0.6125	0.065	0.997855	1.01191	2	3	5	2	Sr2	Fe3	Re5	0	5	2	11.0303	30.651	51.9	0.95	1.83	1.9	ss	vacuum	1000			te		5.57		7.89				61.1966	1.00163		rs		black-blue
Sr2FeReO6	Sr	Fe	Re	O	s	d	d	1.44	0.645	0.58	0.6125	0.065	0.997855	1.01191	2	3	5	2	Sr2	Fe3	Re5	0	5	2	11.0303	30.651	51.9	0.95	1.83	1.9	ss																rs	0.98
Sr2FeReO6	Sr	Fe	Re	O	s	d	d	1.44	0.645	0.58	0.6125	0.065	0.997855	1.01191	2	3	5	2	Sr2	Fe3	Re5	0	5	2	11.0303	30.651	51.9	0.95	1.83	1.9																	rs?
Sr2FeReO6	Sr	Fe	Re	O	s	d	d	1.44	0.645	0.58	0.6125	0.065	0.997855	1.01191	2	3	5	2	Sr2	Fe3	Re5	0	5	2	11.0303	30.651	51.9	0.95	1.83	1.9	HP		1000			te	I4/m										rs	1	black
Sr2FeReO6	Sr	Fe	Re	O	s	d	d	1.44	0.645	0.58	0.6125	0.065	0.997855	1.01191	2	3	5	2	Sr2	Fe3	Re5	0	5	2	11.0303	30.651	51.9	0.95	1.83	1.9	ss	Ar	1000			te	I4/m										rs	1
Sr2FeRuO6	Sr	Fe	Ru	O	s	d	d	1.44	0.645	0.565	0.605	0.08	1.00159	1.01569	2	3	5	2	Sr2	Fe3	Ru5	0	5	3	11.0303	30.651	59	0.95	1.83	2.2	ss	air	1280			m	I2/c	5.508	5.474	7.861		90.127		59.2537			d	0
Sr2FeRuO6	Sr	Fe	Ru	O	s	d	d	1.44	0.645	0.565	0.605	0.08	1.00159	1.01569	2	3	5	2	Sr2	Fe3	Ru5	0	5	3	11.0303	30.651	59	0.95	1.83	2.2	ss	air	1300			m	I2/c	5.5379	5.5429	7.8772		90.11		60.4496		172	d	0
Sr2FeSbO6	Sr	Fe	Sb	O	s	d	p	1.44	0.645	0.6	0.6225	0.045	0.992921	1.00691	2	3	5	2	Sr2	Fe3	Sb5	0	5	10	11.0303	30.651	55	0.95	1.83	2.05	sol-gel	air	1100			m	P21/n	5.1635	5.5954	7.9001		89.99		57.0621			rs	0.72
Sr2FeSbO6	Sr	Fe	Sb	O	s	d	p	1.44	0.645	0.6	0.6225	0.045	0.992921	1.00691	2	3	5	2	Sr2	Fe3	Sb5	0	5	10	11.0303	30.651	55	0.95	1.83	2.05	ss	air/O2	1300			c		7.9						61.6299			rs
Sr2FeSbO6	Sr	Fe	Sb	O	s	d	p	1.44	0.645	0.6	0.6225	0.045	0.992921	1.00691	2	3	5	2	Sr2	Fe3	Sb5	0	5	10	11.0303	30.651	55	0.95	1.83	2.05			1400			c		3.951						61.6767
Sr2FeSbO6	Sr	Fe	Sb	O	s	d	p	1.44	0.645	0.6	0.6225	0.045	0.992921	1.00691	2	3	5	2	Sr2	Fe3	Sb5	0	5	10	11.0303	30.651	55	0.95	1.83	2.05	ss	air	1300			m		5.594	5.571	7.926		90.09		61.7517			rs	1
Sr2FeSbO6	Sr	Fe	Sb	O	s	d	p	1.44	0.645	0.6	0.6225	0.045	0.992921	1.00691	2	3	5	2	Sr2	Fe3	Sb5	0	5	10	11.0303	30.651	55	0.95	1.83	2.05	sol-gel	air	1200			m	I2/m	5.60759	5.58741	7.88845		90		61.79		169.033	rs	0.92
Sr2FeSbO6	Sr	Fe	Sb	O	s	d	p	1.44	0.645	0.6	0.6225	0.045	0.992921	1.00691	2	3	5	2	Sr2	Fe3	Sb5	0	5	10	11.0303	30.651	55	0.95	1.83	2.05	ss	O2	1000			c		7.9098						61.8595			rs	0.76
Sr2FeSbO6	Sr	Fe	Sb	O	s	d	p	1.44	0.645	0.6	0.6225	0.045	0.992921	1.00691	2	3	5	2	Sr2	Fe3	Sb5	0	5	10	11.0303	30.651	55	0.95	1.83	2.05	ss	air	1100			c		7.916						62.0051					pale green
Sr2FeSbO6	Sr	Fe	Sb	O	s	d	p	1.44	0.645	0.6	0.6225	0.045	0.992921	1.00691	2	3	5	2	Sr2	Fe3	Sb5	0	5	10	11.0303	30.651	55	0.95	1.83	2.05	ss	air	1150			m	P21/n	5.6136	5.5951	7.9014		90.002		62.0431			rs	0.78	black
Sr2FeSbO6	Sr	Fe	Sb	O	s	d	p	1.44	0.645	0.6	0.6225	0.045	0.992921	1.00691	2	3	5	2	Sr2	Fe3	Sb5	0	5	10	11.0303	30.651	55	0.95	1.83	2.05	ss	air	1500			m	I2/m	5.6163	5.5959	7.8994		89.99		62.0661			rs	0.78
Sr2FeSbO6	Sr	Fe	Sb	O	s	d	p	1.44	0.645	0.6	0.6225	0.045	0.992921	1.00691	2	3	5	2	Sr2	Fe3	Sb5	0	5	10	11.0303	30.651	55	0.95	1.83	2.05						m	P21/n	5.6132	5.5973	7.9036		90.01		62.0803		168.833	rs	0.59
[truncated: 607 more rows]
[truncated: 28 more columns]

## Sheet: Variable explanations
Formula	Double perovskite stoichiometry (A2BʹBʹʹO6)
A	A-site element
Bʹ	Bʹ-site element
Bʹʹ	Bʹʹ-site element
X	O
Ablock	Block in Periodic Table
Bʹblock	Block in Periodic Table
Bʹʹblock	Block in Periodic Table
rA	A-site ionic radius, according to Shannon
rBʹ	Bʹ-site ionic radius, according to Shannon
rBʹʹ	Bʹʹ-site ionic radius, according to Shannon
rBave	Average B-site ionic radius
rBdiff	B-site ionic radii difference
t	Goldschmidt's tolerance parameter, (rA+rO)/(SQRT(2)*(rBave+rO)
ff	fitness factor, (SQRT(2)*rA)/(rBave+rO)
cA	A-site ionic charge
cBʹ	Bʹ-site ionic charge
cBʹʹ	Bʹʹ-site ionic charge
cBdiff	B-site charge difference
A cation	Element and oxidation state
Bʹ cation	Element and oxidation state
Bʹʹ cation	Element and oxidation state
dA	A-site d electron configuration
dBʹ	Bʹ-site d electron configuration
dBʹʹ	Bʹʹ-site d electron configuration
EiA	A-site cation's ionization potential from current oxidation state
EiBʹ	Bʹ-site cation's ionization potential from current oxidation state
EiBʹʹ	Bʹʹ-site cation's ionization potential from current oxidation state
χA	A-site electronegativity
χBʹ	Bʹ-site electronegativity
χBʹʹ	Bʹʹ-site electronegativity
synthesis method (solid-state, sol-gel, HP, flux, floating-zone)
synthesis atmosphere
syn-T	Maximum synthesis temperature (°C)
Syn-t	Synthesis time at highest temperature
syn-p	Synthess pressure (Gpa)
sys	crystal system, such as c=cubic, m=monoclinic etc.
spg	Space group
a	Unit cell parameters
b	Unit cell parameters
c	Unit cell parameters
α	Unit cell parameters
β	Unit cell parameters
γ	Unit cell parameters
Vol	Unit cellvolume, normalized to single perovskite
c/a	a and c unit cell parameter relation, measure of distortion
Bʹ-O-Bʹʹ	B-site cations' bond angle
type of ordering (disordered, rock-salt, layered)	B-site cation long-range order type
S	B-site cationlong range order parameter, S=2g-1, where g is B-site cation's fractional occupancy
color	sample color
band-gap (eV)	sample band gap, usually optical band gap
metal, semiconductor, insulator, half-metal
n or p -type	Semiconductor type
activation energy
resistivity (Ohm*cm, 300 K)
resistivity (Ohm*cm, 800 K)
Seebeck (µV/K, 300 K)
Seebeck, max (µV/K)
Mag-class	Sample magnetism type
TC/TN	T Curie or Néel temperature
Tweiss
frustration factor
theta (K)
µeff	Effective magnetic moment (µB)
M-sat	Saturation magnetization (µB/f.u.)
Type of AFM (I, II, III)
AFM propagation vector
Cp	Heat capacity
mJ/mol·K2 (Cp/T=gamma+betaT^2)	Heat capacity coefficient
mJ/mol·K4	Heat capacity coefficient
0
reference
reference
Author(s)
